# Supplementary material for: Specialization of the chromatin remodeler RSC to mobilize partially-unwrapped nucleosomes
Source: eLife journal article supplement (doi:10.7554/elife.58130), 2020-06-04
Supplement: supp [file elife-58130-supp-v1.zip]

Archive with 29 entries (29 files):
- elife_poa_e58130_Transparent_Reporting_File.docx
- elife_poa_e58130_Figure_1_figure_supplement_1.ai
- elife_poa_e58130_Figure_1_figure_supplement_2.ai
- elife_poa_e58130_Figure_2_figure_supplement_1.ai
- elife_poa_e58130_Figure_2_figure_supplement_2.ai
- elife_poa_e58130_Figure_2_figure_supplement_3.ai
- elife_poa_e58130_Figure_3_figure_supplement_1.pdf
- elife_poa_e58130_Figure_3_figure_supplement_2.ai
- elife_poa_e58130_Figure_3_figure_supplement_3.ai
- elife_poa_e58130_Figure_3_figure_supplement_4.ai
- elife_poa_e58130_Figure_3_figure_supplement_5.ai
- elife_poa_e58130_Figure_4_figure_supplement_1.ai
- elife_poa_e58130_Figure_4_figure_supplement_2.ai
- elife_poa_e58130_Figure_4_figure_supplement_3.ai
- elife_poa_e58130_Figure_4_figure_supplement_4.ai
- elife_poa_e58130_Figure_4_figure_supplement_5.ai
- elife_poa_e58130_Figure_4_figure_supplement_6.ai
- elife_poa_e58130_Figure_5_figure_supplement_1.pdf
- elife_poa_e58130_Figure_5_figure_supplement_2.pdf
- elife_poa_e58130_Figure_5_figure_supplement_3.pdf
- elife_poa_e58130_Supplementary_file_1.xlsx
- elife_poa_e58130_Supplementary_file_2.xlsx
- elife_poa_e58130_Figure_2_source_data_1.zip
- elife_poa_e58130_Figure_3_source_data_1.zip
- elife_poa_e58130_Figure_4_source_data_1.zip
- elife_poa_e58130_Figure_5_source_data_1.zip
- elife_poa_e58130_Figure_5_source_data_2.xlsx
- elife_poa_e58130_Figure_5_source_data_3.xlsx
- elife_poa_e58130_Figure_5_figure_supplement_1_source_data_1.xlsx
