# Supplementary material for: Specialization of the chromatin remodeler RSC to mobilize partially-unwrapped nucleosomes
Source: eLife journal article supplement (doi:10.7554/elife.58130), 2020-06-04
Supplement: supp [file elife-58130-supp-v1.zip › elife_poa_e58130_Figure_3_figure_supplement_1.pdf]

H3 Tail (not shown)

H3 T3A  
H3 K14A

H3 T107A  
H3 K115A

H3  $\alpha$ -N helix

H3 R40A  
H3 K42A  
H3 G44A  
H3 V46A  
H3 R49A  
H3 R52A  
H3 K56Q

H2A CTD

H2A I112A  
H2A H113A  
H2A L116A  
H2A L117A  
H2A S121A

H2A D73A  
H2A E94A  
H4 Y88A

H2A N74A  
H2A R78A  
H2A L86A

H2A F26A  
H2A R30A

H2A Y51A  
H2B H112A  
H2B E116A

Lethal with *rsc1 $\Delta$*   
Lethal with *rsc2 $\Delta$*

**Figure 3- figure supplement 1.** Synthetic lethal mutations in each of the four histones H2A, H2B, H3, and H4 when combined with *rsc1 $\Delta$*  or *rsc2 $\Delta$*  mutations. Mutations that are specifically lethal in combination with *rsc1 $\Delta$*  are colored purple, mutations that are specifically lethal with *rsc2 $\Delta$*  are colored orange. PDB code 1ID3.
