# Supplementary material for: Specialization of the chromatin remodeler RSC to mobilize partially-unwrapped nucleosomes
Source: eLife journal article supplement (doi:10.7554/elife.58130), 2020-06-04
Supplement: supp [file elife-58130-supp-v1.zip › elife_poa_e58130_Figure_5_figure_supplement_1.pdf]

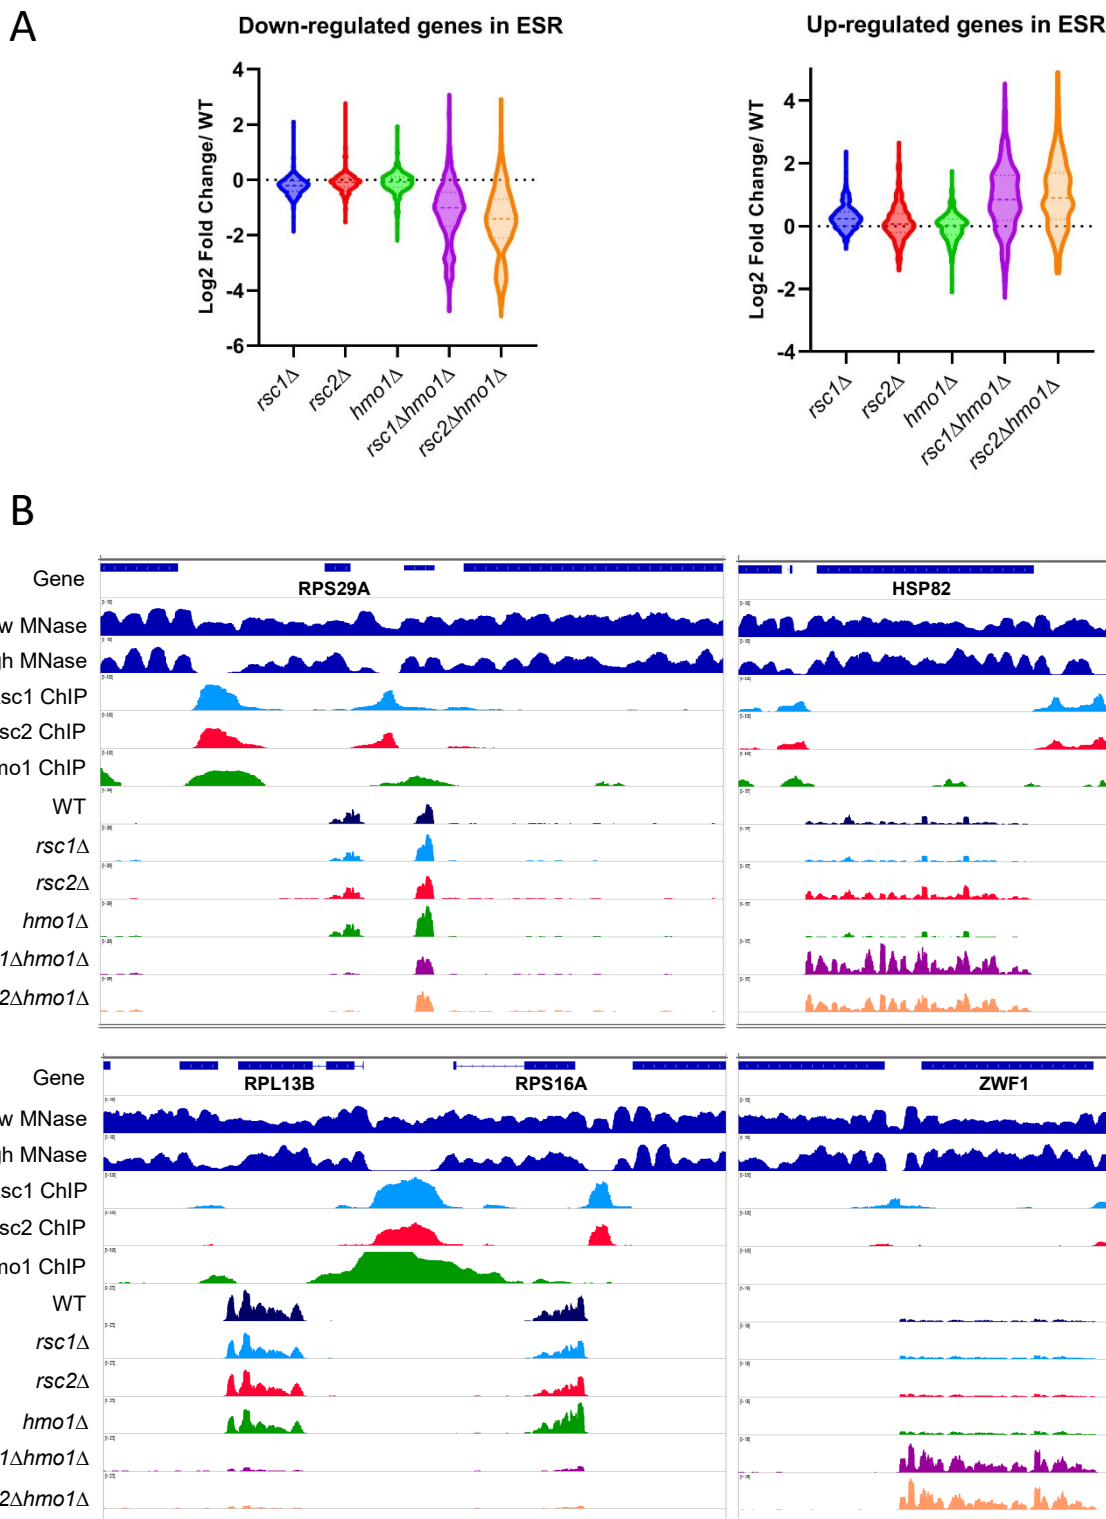

**Figure 5- figure supplement 1.** Gene expression changes in *rsc1Δ*, *rsc2Δ*, and *hmo1Δ* mutants.

(A) The effect of *rsc* deletions on genes involved in the environmental stress response (ESR). Violin plot showing expression changes (average of three biological replicates) in *rsc* mutants for genes that are up-regulated (255 genes) or down regulated (587 genes) in the ESR (Gasch et al, 2000). (B) Genome Snapshots. Shown for select genes are low- (GSM1891202) and high- (GSM1891207) MNase digested fragment coverage from Kubik et al, 2015, Rsc1 and Rsc2 ChIP Seq log2 fold enrichments, Hmo1 ChIP Seq log2 fold enrichment (GSM1509041) from Knight et al, 2014, RNASeq coverage (unstranded) from an average of three biological replicates of RNAseq for WT(YBC604), *rsc1Δ* (YBC774), *rsc2Δ* (YBC82), *hmo1Δ* (YBC3509), *rsc1Δ hmo1Δ* (YBC3514), *rsc2Δ hmo1Δ* (YBC3515). Figure 5- figure supplement 1- Source Data 1. List of ESR affected genes.
