# Supplementary material for: Specialization of the chromatin remodeler RSC to mobilize partially-unwrapped nucleosomes
Source: eLife journal article supplement (doi:10.7554/elife.58130), 2020-06-04
Supplement: supp [file elife-58130-supp-v1.zip › elife_poa_e58130_Figure_5_figure_supplement_1_source_data_1.xlsx]

## Sheet: ESR Gene list
ESR gene list used from Brion et al, 2016
Genes down in ESR	Genes up in ESR
YAL003W	YAL014C
YAL019W	YAL020C
YAL025C	YAL054C
YAL035W	YBL022C
YAL036C	YBL049W
YAL059W	YBL078C
YBL004W	YBL102W
YBL024W	YBR006W
YBL026W	YBR006W
YBL028C	YBR056W
YBL035C	YBR059C
YBL039C	YBR085C-A
YBL092W	YBR126C
YBR025C	YBR149W
YBR030W	YBR183W
YBR034C	YBR222C
YBR060C	YBR259W
YBR061C	YBR269C
YBR079C	YBR280C
YBR084C-A	YBR287W
YBR084W	YCL012C
YBR087W	YCR010C
YBR088C	YCR068W
YBR104W	YCR091W
YBR118W	YDL020C
YBR121C	YDL048C
YBR122C	YDL078C
YBR135W	YDL110C
YBR141C	YDL138W
YBR142W	YDL146W
YBR143C	YDL149W
YBR147W	YDL169C
YBR154C	YDL180W
YBR181C	YDL199C
YBR189W	YDL222C
YBR191W	YDL234C
YBR239C	YDL237W
YBR247C	YDL238C
YBR252W	YDR001C
YBR263W	YDR022C
YBR267W	YDR034C
YBR283C	YDR034C
YCL052C	YDR070C
YCL054W	YDR074W
YCL059C	YDR100W
YCL061C	YDR106W
YCR016W	YDR142C
YCR034W	YDR162C
YCR035C	YDR169C
YCR047C	YDR171W
YCR051W	YDR244W
YCR057C	YDR248C
YCR072C	YDR255C
YCR087C-A	YDR258C
YDL014W	YDR262W
YDL031W	YDR270W
YDL033C	YDR368W
YDL051W	YDR370C
YDL060W	YDR387C
YDL061C	YEL011W
YDL063C	YEL012W
YDL074C	YEL020C
YDL075W	YEL046C
YDL081C	YEL060C
YDL084W	YER010C
YDL111C	YER024W
YDL112W	YER046W
YDL116W	YER071C
YDL117W	YER130C
YDL136W	YFL033C
YDL143W	YFL042C
YDL148C	YFL046W
YDL150W	YFR017C
YDL153C	YFR049W
YDL166C	YGL006W
YDL167C	YGL095C
YDL175C	YGL104C
YDL201W	YGL124C
YDL208W	YGL146C
YDL213C	YGL156W
YDL217C	YGL180W
YDL218W	YGL219C
YDL229W	YGL224C
YDR002W	YGL227W
YDR012W	YGL248W
YDR023W	YGR008C
YDR025W	YGR019W
YDR037W	YGR031W
YDR045C	YGR038W
YDR060W	YGR046W
YDR064W	YGR136W
YDR075W	YGR194C
YDR083W	YGR205W
YDR087C	YGR232W
YDR091C	YGR244C
YDR101C	YGR250C
YDR110W	YGR263C
YDR120C	YGR268C
YDR156W	YHL021C
YDR161W	YHL021C
YDR165W	YHL022C
YDR172W	YHL032C
YDR184C	YHR050W
YDR190C	YHR104W
YDR191W	YHR112C
YDR194C	YHR137W
YDR195W	YHR138C
YDR198C	YHR150W
YDR211W	YHR161C
YDR228C	YHR171W
YDR252W	YHR198C
YDR280W	YHR202W
YDR299W	YIL017C
YDR321W	YIL024C
YDR324C	YIL037C
YDR337W	YIL045W
YDR339C	YIL055C
YDR346C	YIL057C
YDR361C	YIL077C
YDR365C	YIL107C
YDR382W	YIL146C
YDR382W	YIL158W
YDR395W	YIL161W
YDR398W	YIR007W
YDR404C	YIR019C
YDR412W	YIR038C
YDR429C	YJL020C
YDR432W	YJL042W
YDR441C	YJL048C
YDR447C	YJL053W
YDR449C	YJL055W
YDR450W	YJL057C
YDR454C	YJL058C
YDR496C	YJL059W
YDR500C	YJL066C
YDR501W	YJL084C
YDR515W	YJR008W
YEL026W	YJR019C
YEL054C	YJR052W
YEL055C	YJR062C
YEL056W	YJR096W
YER002W	YKL007W
YER006W	YKL034W
YER007C-A	YKL038W
YER025W	YKL047W
YER036C	YKL094W
YER043C	YKL094W
YER049W	YKL117W
YER055C	YKL124W
YER077C	YKL142W
YER082C	YKL151C
YER102W	YKL197C
YER107C	YKL198C
YER110C	YKR004C
YER117W	YKR009C
YER126C	YKR011C
YER127W	YKR049C
YER148W	YKR067W
YER149C	YLL019C
YER151C	YLL039C
YER156C	YLR001C
YER165W	YLR119W
YER172C	YLR149C
YER176W	YLR178C
YFL002C	YLR209C
YFL008W	YLR267W
YFL022C	YLR299W
YFL023W	YLR307C-A
YFL034C-A	YLR312C
YFL045C	YLR352W
YFR001W	YLR361C
YFR002W	YLR408C
YFR009W	YML029W
YFR013W	YML042W
YGL014W	YML128C
YGL029W	YMR025W
YGL030W	YMR053C
YGL043W	YMR054W
YGL050W	YMR070W
YGL063W	YMR105C
YGL078C	YMR106C
YGL097W	YMR107W
YGL099W	YMR110C
YGL103W	YMR111C
YGL105W	YMR114C
YGL111W	YMR140W
YGL120C	YMR155W
YGL122C	YMR170C
YGL123W	YMR171C
YGL135W	YMR191W
YGL171W	YMR196W
YGL172W	YMR197C
YGL189C	YMR216C
YGL195W	YMR250W
YGL201C	YMR253C
YGL211W	YMR261C
YGL226W	YMR280C
YGL232W	YMR291W
YGL234W	YMR297W
YGL245W	YMR298W
YGL246C	YMR311C
YGR001C	YNL006W
YGR027C	YNL008C
YGR034W	YNL009W
YGR061C	YNL015W
YGR081C	YNL115C
YGR083C	YNL159C
YGR085C	YNL165W
YGR090W	YNL168C
YGR094W	YNL274C
YGR103W	YNL291C
YGR119C	YNL305C
YGR123C	YNR006W
YGR128C	YOL053W
YGR145W	YOL140W
YGR148C	YOR020W-A
YGR150C	YOR030W
YGR159C	YOR035C
YGR162W	YOR052C
YGR173W	YOR094W
YGR187C	YOR155C
YGR195W	YOR173W
YGR200C	YOR178C
YGR208W	YOR220W
YGR214W	YOR289W
YGR245C	YOR320C
YGR264C	YOR374W
YGR271C-A	YOR389W
YGR280C	YPL006W
YGR283C	YPL045W
YGR285C	YPL054W
YHL001W	YPL060W
YHL011C	YPL070W
YHL013C	YPL084W
YHL016C	YPL096W
YHL033C	YPL100W
YHR003C	YPL110C
YHR010W	YPL123C
YHR013C	YPL139C
YHR019C	YPL154C
YHR020W	YPL159C
YHR021C	YPL186C
YHR032W	YPL188W
YHR033W	YPL201C
YHR052W	YPL224C
YHR062C	YPL229W
YHR064C	YPL248C
YHR065C	YPR022C
YHR065C	YPR026W
YHR066W	YPR091C
YHR068W	YPR097W
YHR069C	YPR098C
YHR072W-A	YPR151C
YHR081W	YPR160W
YHR085W	YPR184W
YHR088W
YHR089C
YHR091C
YHR128W
YHR141C
YHR143W-A
YHR144C
YHR148W
YHR165C
YHR167W
YHR169W
YHR170W
YHR193C
YHR196W
YHR197W
YHR203C
YIL018W
YIL019W
YIL020C
YIL021W
YIL026C
YIL035C
YIL052C
YIL064W
YIL078W
YIL091C
YIL096C
YIL103W
YIL104C
YIL110W
YIL127C
YIL133C
YIL148W
YIR001C
YIR012W
YIR026C
YJL004C
YJL006C
YJL008C
YJL010C
YJL011C
YJL014W
YJL033W
YJL041W
YJL050W
YJL061W
YJL069C
YJL074C
YJL087C
YJL109C
YJL122W
YJL136C
YJL148W
YJL183W
YJL190C
YJL208C
YJR002W
YJR003C
YJR007W
YJR014W
YJR032W
YJR041C
YJR042W
YJR063W
YJR070C
YJR123W
YJR124C
YJR132W
YJR133W
YKL009W
YKL014C
YKL021C
YKL056C
YKL078W
YKL082C
YKL099C
YKL106W
YKL110C
YKL113C
YKL143W
YKL144C
YKL149C
YKL172W
YKL180W
YKL181W
YKL183W
YKL191W
YKR024C
YKR025W
YKR026C
YKR056W
YKR079C
YKR081C
YKR092C
YLL011W
YLL018C
YLL034C
YLR002C
YLR003C
YLR004C
YLR009W
YLR017W
YLR020C
YLR051C
YLR059C
YLR060W
YLR063W
YLR073C
YLR074C
YLR075W
YLR084C
YLR106C
YLR129W
YLR139C
YLR146C
YLR150W
YLR167W
YLR172C
YLR175W
YLR176C
YLR186W
YLR192C
YLR195C
YLR196W
YLR197W
YLR221C
YLR222C
YLR239C
YLR243W
YLR244C
YLR276C
YLR285W
YLR287C
YLR291C
YLR313C
YLR325C
YLR336C
YLR340W
YLR372W
YLR384C
YLR397C
YLR401C
YLR409C
YLR413W
YLR432W
YLR435W
YLR439W
YML010W
YML014W
YML038C
YML063W
YML073C
YML074C
YML080W
YML093W
YML108W
YMR014W
YMR049C
YMR080C
YMR093W
YMR116C
YMR121C
YMR128W
YMR146C
YMR188C
YMR215W
YMR217W
YMR229C
YMR239C
YMR247C
YMR259C
YMR260C
YMR269W
YMR271C
YMR290C
YMR309C
YNL002C
YNL014W
YNL016W
YNL022C
YNL023C
YNL039W
YNL061W
YNL062C
YNL067W
YNL075W
YNL102W
YNL110C
YNL112W
YNL113W
YNL119W
YNL124W
YNL132W
YNL141W
YNL151C
YNL153C
YNL175C
YNL178W
YNL182C
YNL186W
YNL189W
YNL201C
YNL207W
YNL213C
YNL221C
YNL227C
YNL232W
YNL248C
YNL252C
YNL255C
YNL290W
YNL292W
YNL308C
YNL313C
YNL315C
YNR003C
YNR012W
YNR015W
YNR024W
YNR038W
YNR046W
YNR051C
YNR053C
YNR054C
YOL010W
YOL021C
YOL022C
YOL040C
YOL041C
YOL077C
YOL080C
YOL097C
YOL115W
YOL120C
YOL121C
YOL123W
YOL124C
YOL127W
YOL130W
YOL139C
YOL141W
YOL142W
YOL144W
YOR001W
YOR004W
YOR039W
YOR046C
YOR056C
YOR063W
YOR074C
YOR078W
YOR091W
YOR095C
YOR096W
YOR116C
YOR119C
YOR130C
YOR131C
YOR145C
YOR167C
YOR168W
YOR182C
YOR198C
YOR201C
YOR206W
YOR207C
YOR210W
YOR216C
YOR217W
YOR224C
YOR243C
YOR252W
YOR253W
YOR257W
YOR260W
YOR271C
YOR272W
YOR274W
YOR276W
YOR287C
YOR293W
YOR294W
YOR310C
YOR312C
YOR340C
YOR341W
YOR361C
YOR369C
YPL012W
YPL030W
YPL043W
YPL048W
YPL086C
YPL093W
YPL117C
YPL126W
YPL131W
YPL143W
YPL146C
YPL160W
YPL183C
YPL210C
YPL211W
YPL217C
YPL226W
YPL237W
YPL245W
YPL249C-A
YPL263C
YPL266W
YPR010C
YPR016C
YPR033C
YPR034W
YPR041W
YPR043W
YPR060C
YPR110C
YPR112C
YPR137W
YPR139C
YPR143W
YPR144C
YPR163C
YPR169W
YPR187W
YPR190C

## Sheet: Genes Up in ESR
log2 fold change/ WT
rsc1	rsc2	hmo1	rsc1hmo1	rsc2hmo1	rsc30	rsc1rsc30	rsc2rsc30
0.336546	-0.15292	0.300095	2.14897	2.62136	-0.12321	0.340621	0.783713
0.500256	-0.25452	-0.16867	1.69619	1.39521	0.082156	0.310025	0.589058
0.298042	-0.04152	0.494672	1.87768	1.25233	0.148981	0.173977	0.609318
0.349706	0.549085	0.273215	1.66584	1.44629	0.090138	0.224645	0.104493
0.565938	0.674092	0.107084	0.747883	1.88571	-1.02167	0.0788	-0.65388
0.379187	0.207964	-0.01916	0.562688	0.193592	0.437198	0.166518	0.802264
-0.2031	0.924619	0.071104	0.040938	0.722716	-1.24917	-1.14674	1.35959
0.61677	-0.34227	0.426837	1.9721	1.294	0.484232	0.808418	1.36998
0.109669	-0.55728	-0.41218	-0.10488	0.156847	-0.17209	-0.32009	-0.49974
-0.24517	0.151024	-0.101	-0.21349	-0.23412	-0.56036	-0.28572	-0.62686
0.801693	1.05741	0.734741	0.994034	0.599861	0.96385	0.74393	2.4368
0.352398	0.517254	0.089533	0.230199	-0.11537	-0.0889	0.316186	0.700783
1.01379	0.408269	0.727189	2.45996	2.38361	0.652752	1.18515	1.86304
0.426005	0.799122	-0.71232	0.48277	1.56422	-0.56741	-0.27124	0.708789
0.380547	-0.49283	-0.01931	0.803947	0.398035	0.093711	0.289044	0.448981
-0.21252	-1.27658	0.175591	0.445088	-0.40092	-1.21915	-1.12604	-1.74738
0.143574	-0.39417	-0.0685	0.329148	0.178469	-0.07311	0.064781	0.185896
-0.14136	0.395249	-0.64592	0.381052	0.646707	0.186638	-0.39913	0.422412
0.204432	0.327282	1.11818	1.32774	1.96867	1.3407	0.053507	1.73871
0.508953	0.107488	-0.32482	1.57298	2.31646	-0.56806	-0.26212	0.227244
1.47533	1.96485	-0.43828	2.4832	3.68884	0.127349	0.756291	2.60092
0.002166	0.188103	-0.42	-0.04787	0.222204	-0.33488	-0.16079	-0.99619
0.150273	-0.22372	0.238417	-0.81335	0.094625	-0.81796	-0.02039	0.233362
0.297661	0.347029	0.238051	1.03805	1.4723	-0.26922	0.278811	1.34806
-0.05016	-0.36345	0.83804	0.487908	0.390793	0.064874	0.429735	0.359098
0.380702	-0.22521	-0.45163	1.18601	0.761856	0.207233	0.098514	-0.0731
0.043612	0.515025	0.251884	0.624975	0.885981	0.274658	-0.11398	-0.04623
0.255251	-0.32531	0.300224	0.582242	0.155064	0.175066	-0.11452	0.161677
0.377785	-0.63109	0.221468	1.33464	0.777262	-0.12042	-0.28756	-0.07549
0.31698	-0.31448	0.008284	1.1464	0.859388	0.408311	0.279075	0.483718
0.254681	-0.27871	-0.05639	0.576326	0.623825	-0.40902	-0.05941	-0.34058
0.002881	-1.02982	0.207053	-0.32428	-0.48375	-0.21328	0.199025	0.038957
0.139286	-0.01596	-0.07351	-1.12061	-1.09768	0.286435	0.245469	-0.66216
0.235137	-0.36575	0.015848	0.761283	0.830815	-0.13487	-0.05966	0.275314
0.104605	-0.82189	0.131671	0.420976	0.106465	0.070622	0.008074	-0.19268
-0.38115	0.367738	-0.2356	-0.75437	-0.48694	-0.35175	-0.80378	-0.59944
0.724447	0.916419	-1.11916	1.72115	2.96079	-0.69536	0.250548	-0.29391
1.07215	0.177989	0.781287	2.62708	2.60746	-0.41869	0.510504	1.84188
0.115538	0.371143	0.099195	1.15685	1.6491	-0.28556	-0.61784	-1.1269
0.069403	0.102849	0.052618	1.01688	1.17864	-0.10368	-0.11164	-0.55915
0.017394	-0.25878	0.045108	-0.14638	-0.18941	0.129221	0.181652	-0.23039
0.190813	0.053258	-0.71532	-0.28324	0.230675	-0.19855	0.363852	-0.19572
0.000207	-0.0226	-0.01489	0.034083	0.40717	-0.28368	-0.15661	0.354457
-0.03792	-0.01553	0.088058	-0.39215	-0.23864	-0.01699	0.08333	-0.21905
0.455211	0.586669	-0.29787	2.12422	2.03972	0.409702	-0.10226	0.738627
0.082385	-1.06384	0.138632	0.360971	-0.04937	0.199333	-0.02625	-0.25396
-0.3564	-0.55495	0.17569	-0.55177	-0.70552	-0.48047	-0.97907	-0.4414
0.930557	0.48188	-0.39832	1.22043	1.94692	-0.66679	0.6268	0.169659
1.14735	0.487343	0.360363	1.21543	0.438866	-0.87164	0.894055	0.08
0.204617	-0.022	-2.1e-05	0.893984	0.639494	0.345439	0.326063	0.837129
1.06915	0.039881	0.157694	1.62657	1.16587	-1.06626	-0.64096	-0.12192
0.149656	0.322681	0.277126	1.62649	1.86359	0.333056	0.127732	1.03993
0.261234	-0.01442	0.186998	0.596062	1.06239	-0.59808	0.291863	-1.28552
0.797812	0.33627	-0.74332	1.62743	1.73788	-0.41847	-0.34593	0.99599
0.464392	0.599825	0.122347	2.49199	2.31925	-0.02995	-0.11115	0.762337
-0.4779	0.154959	-0.16869	-0.78202	-0.5276	0.01798	-0.23733	-0.53773
0.513282	-0.12458	-0.33581	1.61835	1.1198	0.45045	0.254577	-0.22517
0.456173	0.791199	-1.70572	1.2785	2.50397	-0.655	0.001242	-0.1885
0.613213	0.946698	0.956965	0.612246	0.563432	0.22896	-0.11573	1.926
-0.07433	0.132064	0.06756	1.04199	1.55886	-0.32319	-0.57293	-0.56984
-0.17122	-0.13068	0.023312	-0.27873	0.622829	-0.23521	-0.34039	-0.3471
0.901496	0.033258	-0.15274	1.18022	1.51852	0.499437	0.500256	0.764991
-0.05284	0.018664	0.031345	1.34412	1.25962	-0.23025	-0.1918	-0.19899
0.243296	0.311785	-0.56401	0.852326	0.781485	-0.89882	-0.55975	-0.55429
0.392525	-0.12278	-0.52348	0.315	0.198347	-0.89341	-0.26007	0.712302
0.153693	-0.00047	0.488182	1.56696	1.48638	0.242836	0.278443	0.463626
-0.24243	1.09517	-0.9522	0.534499	1.03262	-0.62803	-1.05963	-0.40108
0.859094	-0.12095	0.278782	1.63067	1.61779	-1.01851	0.074266	2.1231
0.094645	-0.69469	-0.20425	0.801984	0.484452	0.157483	-0.26094	-0.27366
0.223977	-0.29856	0.097805	-0.86416	-0.5689	-0.25428	0.120852	-0.45794
0.258598	-0.29363	-0.15138	1.4716	1.14994	-0.09902	-0.69794	0.004469
0.18028	0.172975	0.407128	0.632028	0.691321	-0.20987	-0.13484	0.335747
0.047614	-0.44031	-0.54761	-0.19044	-0.28753	-0.16327	-0.11265	-0.9053
-0.02686	0.239001	0.15807	0.553543	0.702841	-0.31845	-0.01854	0.221395
-0.08853	-0.01092	-0.28861	0.995422	0.533709	-0.1998	0.275913	-0.83255
-0.05352	-0.18884	-0.11278	1.65215	1.73624	-0.72115	-0.73059	-0.3619
0.130802	-0.05601	0.23497	0.414863	0.376789	0.320162	0.279104	0.211789
0.149785	-0.48462	-0.35971	-0.03772	0.083739	-0.23204	-0.64833	0.282412
0.286875	-0.61329	0.276517	0.544879	0.636598	0.012214	0.13295	-0.02806
0.451805	0.549943	-0.2632	1.68087	2.96196	-0.02992	0.208576	1.61271
0.067906	0.49439	-0.83324	0.582232	0.501882	0.010047	0.331065	1.85193
0.295642	-0.01416	-0.26387	1.43575	0.94659	0.173751	-0.0768	0.186019
0.713127	2.66179	1.16371	2.62772	2.07098	0.32128	0.484476	1.0291
0.490783	0.606144	0.543169	1.90982	1.93602	0.994128	1.29379	0.603045
0.830979	-0.13596	0.367133	3.47507	3.99919	-0.76297	-0.22771	0.705966
0.581556	-0.12957	-0.66678	1.44774	1.91582	0.24585	0.069985	0.721531
0.310595	0.165803	-0.37099	0.974462	2.20351	-0.31287	-1.19057	-0.7615
0.323044	0.671551	-0.3155	1.0593	1.51792	0.17499	-0.7052	0.587373
0.075757	0.460839	0.067421	0.216431	0.630542	0.729664	0.400177	0.601396
0.420767	0.291417	-0.29208	1.81752	1.34298	0.322009	0.280383	1.2106
0.24245	0.14769	0.149359	0.478292	0.613143	-0.18595	-0.03591	0.570657
0.231062	-0.64833	-0.12739	0.372022	0.23001	0.25205	0.536985	0.746244
0.3402	0.131872	0.21846	1.11479	1.36169	0.168781	0.377643	0.203731
0.089406	0.0385	-0.06986	0.753954	0.021521	0.510684	0.223026	0.162993
0.402007	-1.08991	0.093313	0.850819	-0.16917	0.139984	0.614764	-0.67937
0.274489	0.734739	-0.20206	0.489344	-0.07281	-0.53488	0.045376	1.23733
0.113127	0.657641	0.368942	0.079422	1.2752	-0.50999	0.196483	0.218494
0.525735	1.06571	0.171778	1.7179	1.36259	-0.06855	-0.3279	2.13112
0.339357	0.085705	0.247775	0.395488	0.662385	0.013645	0.24005	0.026251
0.339357	0.085705	0.247775	0.395488	0.662385	0.013645	0.24005	0.026251
-0.45811	0.292806	-0.30331	-1.68029	-1.27246	-0.89996	-0.74469	-1.99104
0.219581	0.013885	0.097126	1.85008	1.63379	0.00356	0.002834	0.977647
-0.14964	0.400874	-0.87381	0.169558	1.56598	-1.33267	-1.35931	-1.08301
0.245211	-0.38773	0.006272	-0.03329	0.649687	-0.46821	-0.20291	0.471967
1.31699	2.22614	-0.51157	3.08801	4.90795	0.512171	0.536272	3.93002
-0.32048	0.325809	-0.39632	1.06488	1.3407	-0.81412	-0.8596	-0.67857
0.26678	-0.15087	0.118933	0.697392	0.739754	-0.04032	-0.00651	0.08465
-0.01482	0.671192	0.135219	0.678866	1.17616	-0.24035	0.124167	0.168059
0.551852	-0.27679	0.288714	1.00218	0.906474	0.38639	0.467045	0.038768
-0.2244	-0.68452	-0.36379	-1.1522	-0.64666	-0.9442	-0.6017	-0.08788
0.352495	0.207532	0.125979	1.71564	1.33573	0.11814	0.116624	0.179883
0.085249	-0.75493	-0.24511	-0.24551	-0.05046	-0.18608	-0.05249	-0.42395
0.914394	-0.95677	-0.3209	0.134072	-0.56926	-0.56718	0.396616	-0.81679
-0.01932	-0.52518	0.060307	-0.00772	0.378495	0.217929	0.119327	0.036972
-0.45671	-0.27792	-0.63753	0.824323	1.57296	-1.01138	-1.52486	0.831977
0.533996	0.75965	0.053752	0.189508	0.307341	0.092635	-0.2872	1.14126
1.02284	-0.1892	-0.66351	2.2167	1.28804	0.063974	0.047239	1.48438
0.217587	1.03446	-0.81474	-1.26289	-0.20769	-1.54821	-1.07537	0.591831
-0.008	0.384162	-0.53116	1.58347	1.54214	0.288236	0.007854	0.706409
0.367733	0.02022	-1.03992	0.970438	0.790751	-0.53367	-0.28604	0.079712
0.415563	0.224399	-0.09119	0.974414	1.25546	-0.00423	-0.03079	0.157077
-0.72161	-0.53877	-0.56807	1.57655	2.89395	-0.91915	-0.87726	-1.01838
0.4439	0.704818	-0.09006	1.47922	0.659325	0.074552	0.183585	1.73017
-0.05034	-0.83886	-0.22204	-0.30077	-0.65666	-0.46978	-0.31475	-1.82891
0.68662	0.845073	-1.12292	0.96821	2.26546	0.435473	0.64535	1.78151
0.338178	0.300496	0.739975	2.70721	1.79136	0.195421	-0.04684	1.66858
0.16108	-0.2353	-0.11162	-0.32524	0.062692	-0.53746	-0.28949	-0.25996
0.493126	-0.13005	-0.22106	1.64475	1.8676	-0.38061	-0.65107	0.665931
0.121941	-0.20199	-0.05809	0.668382	0.810332	0.325202	0.065725	1.07658
-0.19578	0.342888	-0.56692	-2.27725	-1.50082	-0.30311	0.057869	-0.41682
0.117888	0.017049	0.332836	0.358553	-0.21437	0.237836	0.287303	-0.17035
0.982088	0.128837	0.212711	2.08128	2.00598	-0.02706	0.74562	1.41097
-0.08635	-0.37367	-0.13019	-0.22175	-0.12606	-0.58987	-0.27996	-0.54221
-0.26179	0.110291	-0.14939	1.0767	1.44754	-0.39464	-1.07727	-0.65187
1.03086	-0.26561	0.559932	0.487938	0.792192	0.132036	-0.11789	2.63124
0.419632	-0.08202	0.505648	1.41154	1.54662	0.255899	0.030152	1.15511
0.133985	0.355826	0.112491	0.638361	2.14065	-1.42071	-0.40079	-0.13944
-0.13732	-0.14206	0.054573	1.48951	1.06017	-0.03542	-0.14901	-0.16307
0.450105	1.37145	0.220603	2.16911	2.21867	-0.94479	-0.21482	1.9157
0.290065	0.404545	-0.33345	1.23329	1.32953	0.065227	-0.14585	0.320945
0.335413	-0.98055	-0.25867	-0.67995	-1.37664	0.239534	-0.04127	-0.84259
0.830979	-0.13596	0.367133	3.47507	3.99919	-0.76297	-0.22771	0.705966
0.791346	-1.13056	0.395239	0.359204	0.351376	-2.09476	-0.68812	-0.30101
0.176429	0.477301	0.159707	1.73838	2.22257	0.176541	-0.64696	0.741841
0.587667	0.540666	0.633042	1.03891	0.978409	1.27071	1.35686	1.86707
0.109836	-0.0897	0.146056	-1.06911	-0.36532	0.134488	-0.04106	0.946601
-0.26278	-0.12691	0.415449	0.57183	0.858698	-2.14693	-2.8975	-0.15476
0.239766	-0.48961	-0.12492	1.627	2.53081	0.129674	-0.71474	0.208295
0.393136	-0.20005	-0.34872	1.45276	1.57946	0.245705	0.399322	0.272038
0.825942	1.52291	0.591093	2.29	1.51955	-0.19759	-0.16316	1.79374
0.261593	0.516128	-0.16734	0.138997	0.540078	0.098984	0.126507	-0.29484
0.440521	0.456575	-0.07815	1.4411	1.73224	0.273063	0.37774	0.544924
-0.03767	0.208211	0.391497	0.565379	1.10607	-0.34434	-0.43144	0.954729
0.349432	-0.32533	0.386753	1.16833	0.882648	-0.2209	0.095345	0.853546
-0.17119	-0.59562	-0.19419	-0.27492	0.032332	-0.17252	-0.74428	-0.71317
-0.07349	-0.08825	-0.35694	1.98988	1.89412	-0.34913	-0.78596	0.664024
-0.27119	0.045742	-0.14909	-1.41904	-0.80282	-0.10886	-0.27292	-0.84475
0.211081	0.395186	-0.56318	1.28448	1.66971	-1.47035	-1.25562	0.468796
0.549202	0.701312	0.139724	2.84096	2.49864	-0.15655	-0.35711	1.22349
0.216795	0.305882	-0.14707	1.82133	2.10133	-0.2264	-0.45628	-0.22705
0.275573	0.273013	0.065178	-0.08475	0.151461	0.133397	0.070792	0.944438
0.443686	0.135859	-0.57719	1.24094	1.62947	-0.3918	0.423045	0.175648
1.16595	1.67772	-0.7894	4.54256	3.25898	0.182756	-0.06978	3.46378
2.17299	0.021729	1.75746	2.11312	3.0114	0.064249	0.31102	2.90778
0.382448	0.615643	-0.68583	1.70439	2.5681	0.168659	-0.12956	0.102876
-0.10979	0.049073	-0.89555	-1.35268	-1.11187	-0.73091	-0.42278	-1.02791
0.744326	0.175716	1.10209	0.154619	1.36853	-0.13084	0.001086	1.82113
0.803308	-0.32335	0.714606	1.52714	1.56563	0.283941	0.478078	1.74742
-0.07662	-0.29477	0.099916	0.754295	0.659632	-0.09199	-0.38881	0.338645
-0.02136	-0.57775	-0.01632	0.786525	0.530391	0.067919	-0.34677	-0.16724
-0.27397	0.137482	-0.38893	1.39055	1.41022	-1.03875	-0.74973	-1.65577
-0.02857	-0.42605	-0.38846	2.22708	1.66893	-0.93284	-0.57841	0.334279
0.083684	-0.10939	-0.51322	-0.9934	-0.71049	-0.42504	-0.22731	-1.32927
0.452436	0.084142	0.104551	-0.17795	0.104083	0.213426	0.342608	0.724928
0.21332	-0.05596	0.115594	1.13756	1.22558	0.087374	0.051066	0.706899
-0.16338	-0.2164	-0.18795	0.651771	0.73641	-0.97251	-0.90623	-0.55198
0.61868	0.144316	0.134001	1.93283	3.46338	-0.61509	0.094819	1.309
0.00388	-0.19567	0.154061	0.549255	0.723169	0.017277	-0.39233	-0.19104
0.439043	-1.41179	-0.11969	-0.25821	-0.96378	-0.45093	0.238092	-0.43342
0.034156	0.114129	-0.12998	-0.1336	-0.53956	0.07954	0.574085	-0.03252
0.874541	1.80136	0.262153	4.09735	4.3997	-0.34022	-1.0786	1.39844
0.155593	0.082768	0.284225	0.869416	0.871968	0.199441	0.361495	0.227626
0.262587	0.859651	0.034492	1.71411	2.23939	0.070818	0.120284	0.716153
0.461716	0.27347	0.235182	1.96587	1.83287	0.413429	0.378653	0.904732
-0.21474	-0.02357	-0.2083	-0.3264	-0.26208	0.000691	-0.21181	-0.14476
-0.07287	-0.06029	-0.20056	-0.42434	-0.22435	0.018047	-0.21076	-0.15147
-0.06404	-0.07113	0.128588	0.155927	0.831594	-0.35879	-0.66525	-0.5999
1.2525	1.07221	-0.36141	1.47342	2.35057	-0.18723	0.655715	0.123556
0.161838	0.342302	0.238467	0.513643	0.438134	-0.46584	-0.37688	-0.32154
0.249551	0.035843	0.019372	1.43232	1.65076	-0.04335	-0.16737	0.616877
0.081167	0.353814	-0.14798	1.36616	0.975206	-0.4365	-0.48679	-0.68342
0.89343	-0.80421	0.793956	1.44333	1.9167	-1.05761	-0.45695	0.978285
-0.39398	-0.20354	-0.27687	0.834779	1.02456	-0.82209	-0.77948	-1.27134
0.145772	0.356219	0.163289	0.666066	2.13809	-0.39794	-0.61142	0.869264
-0.02948	0.056697	-0.49102	-0.89379	-0.33489	-0.26044	-0.37617	-0.96183
0.224957	0.10704	-0.18448	0.778905	0.858302	-0.26292	-0.28553	1.19909
-0.07682	-0.02935	-0.75568	-1.02015	-0.81806	-0.95116	-0.40351	-1.07009
0.109404	0.963417	-0.06125	0.883616	1.62091	0.701609	0.760443	0.908539
0.194104	-0.51826	0.243319	0.265759	0.594742	0.033612	0.191462	-0.59905
0.069899	0.211144	0.206952	0.725718	0.69706	0.108947	-0.05359	-0.55528
0.136081	0.015465	-0.22857	-0.39607	-0.21001	-0.39158	0.197311	-1.50696
0.139688	0.101314	-0.19463	0.29451	0.542058	-0.8399	-0.18719	-1.2486
0.333857	-0.1458	0.04952	0.98792	0.758648	-0.13331	-0.05837	0.660246
0.084821	-0.68393	0.374481	0.040069	0.604368	-0.27541	-0.27799	0.006924
-0.03407	0.229977	-0.48055	0.856665	1.49905	-0.38738	-1.13695	-0.28842
0.552718	-0.03929	0.068243	1.842	1.26327	0.077132	0.026589	1.01498
-0.47308	-0.1388	-0.38271	-1.87048	-1.35347	-0.55646	-1.23072	-0.58855
0.521784	-0.07238	0.408924	1.07154	1.79647	-0.1512	-0.22784	0.949477
0.35284	0.023869	-0.02986	0.076952	0.035505	0.298961	0.102123	0.505709
0.052592	0.63042	-0.27072	-0.59273	0.029353	0.116554	-0.76372	0.943384
0.438797	0.388465	0.15545	1.17204	0.697851	0.508495	0.610427	1.02864
0.282624	0.626718	-0.24656	-0.04332	0.119035	-0.71134	0.017705	-0.3071
-0.18601	0.028158	0.02037	0.068031	0.087905	-0.02666	-0.14166	-0.44735
0.306199	0.221103	0.501987	1.61823	0.949774	0.180859	0.041288	0.884565
0.594039	0.685267	-0.57749	1.73871	2.05291	-0.4701	-0.75917	-0.19718
0.481914	0.065349	-0.26849	2.65055	0.897834	0.415803	0.465836	0.81363
0.232428	0.339554	0.334242	0.86066	1.2531	0.014501	-0.08887	0.439781
0.362658	0.00291	0.050817	0.277988	-0.05525	-0.22634	0.155637	-0.06964
0.52762	0.489075	0.067802	0.746945	1.32334	0.481201	0.436657	0.327996
0.467964	0.194986	-0.16124	0.452389	0.004168	0.741574	0.700697	0.811218
-0.03947	-0.03607	0.105871	1.72473	1.70549	-0.20485	-0.44622	-0.53107
0.24665	-0.01623	0.233179	1.76377	1.20363	0.314414	0.02832	0.887589
0.008582	-0.18201	0.264055	0.473471	0.62487	0.107874	-0.0081	0.20513
0.152249	-0.67834	-0.09229	0.575611	-0.28305	-0.08137	-0.06361	-0.39289
-0.165	-0.31021	0.328326	-0.11156	-0.164	-0.04618	-0.50473	0.036247
1.70025	1.90362	0.25657	3.78732	4.73736	0.311075	0.651447	4.10217
0.215945	1.41935	0.090167	1.88838	2.6919	-0.22189	-0.44906	0.345104
0.21804	0.331944	0.048604	0.438048	0.66692	0.182692	0.084817	0.198798
0.049374	0.269093	-0.45243	-0.90869	-0.43113	-0.46901	0.143166	-0.56932
-0.08703	1.03099	0.386117	1.30858	2.4704	0.068945	-0.16224	1.06935
0.311696	0.043852	-0.22391	2.16921	2.25247	-0.24128	-0.63483	2.39091
-0.20754	1.87075	0.102222	2.67747	3.19903	-0.67599	-1.41655	0.524343
0.103067	0.100946	0.28274	0.55964	1.0677	0.086507	-0.08507	0.657614
0.518047	0.565662	-0.20671	2.40579	2.53085	-0.25361	-0.55207	0.858397
0.295019	-0.10686	0.116708	0.588649	-0.10707	-0.01711	0.256963	0.640144
-0.10708	-0.36718	0.179969	-0.1189	0.281981	-0.38805	-0.54195	0.357361
0.225465	-0.1276	-0.0167	0.051958	-0.08515	-0.0263	0.160927	-0.42335
0.037212	0.935785	-0.06986	-0.02019	-0.0674	0.113309	-0.90807	0.402369
0.183931	-0.21772	-0.28054	-0.13765	0.354399	-0.51617	-0.01082	0.166912
-0.24495	0.647483	0.082888	1.37594	2.29721	-0.07551	-0.85114	-0.77833
1.04329	0.691188	-2.1025	2.07558	3.54638	-0.06789	0.21735	1.80026
0.797812	0.33627	-0.74332	1.62743	1.73788	-0.41847	-0.34593	0.99599
0.246581	1.21434	-0.39517	1.28027	2.11625	-0.12341	-0.46085	0.901322
0.964741	-0.39109	-0.02975	1.00813	0.556251	-1.04858	-0.19547	-0.18727
0.233052	0.024382	0.13962	1.05392	0.687877	0.181232	0.116551	0.240633
-0.0605	0.311595	0.574586	0.137028	1.17179	-0.41037	-1.03147	-0.16848
2.37859	1.33346	0.152283	3.22876	2.53279	1.2957	0.790017	4.81034
0.70489	0.134321	0.548061	2.36062	2.09391	0.176147	1.0473	1.38369
0.947513	1.09629	0.419518	2.28587	2.83637	0.941382	0.331138	2.86575
-0.0575	-0.08406	0.286457	0.553085	0.441732	0.333812	0.192883	0.206479
1.06916	0.1586	0.775389	2.7048	2.74758	-0.73459	-0.72175	2.68125
0.585003	-0.12564	-0.00284	1.11747	0.975718	0.677729	0.386223	0.656314
0.803308	-0.32335	0.714606	1.52714	1.56563	0.283941	0.478078	1.74742
0.989561	0.9077	0.360488	2.71336	2.14904	0.265088	0.413187	1.88085
-0.05874	-0.52692	0.205048	-0.40958	-0.20613	-0.19194	-0.11987	-0.0246

## Sheet: Genes down in ESR
log2 fold change/WT
rsc1	rsc2	hmo1	rsc1hmo1	rsc2hmo1	rsc30	rsc1rsc30	rsc2rsc30
-0.20182	-0.00565	0.418973	0.12973	-0.70195	0.143798	0.291099	-0.14291
-0.04114	-0.00579	0.386657	-0.76535	-1.444	0.095429	0.609829	0.440388
-0.13315	0.07588	0.183621	-0.38952	-0.58115	0.133563	0.173618	-0.34184
-0.2683	-0.31918	-0.37508	-1.04952	-1.35343	0.35368	0.233372	-0.55206
-0.5675	-0.19038	-0.43042	-1.828	-2.04737	0.376081	0.035349	-0.86807
0.181797	-0.07083	-0.08678	-0.28176	-0.51008	0.544826	1.01617	0.127021
-0.05085	-0.14594	-0.28442	-1.25354	-1.88896	0.086934	0.451253	0.292556
-0.39191	-0.23344	0.176196	-0.72988	-1.10372	-0.24321	-0.40517	-0.72308
-0.19292	-0.18665	0.046658	-1.24508	-1.64869	0.182047	0.394986	0.257134
-0.12623	-0.29546	-0.30619	-1.25744	-1.50525	0.319236	0.265898	-0.19399
-0.08429	-0.10344	0.049113	-0.50213	-0.95048	0.26367	0.329381	0.631721
-0.36631	-0.21922	-0.29426	-0.48998	-0.94014	0.33438	0.097009	-0.59558
0.070138	-0.04013	0.024979	-0.75892	-0.99999	0.31639	0.409207	0.288347
-0.58392	-0.30232	-0.33175	-3.52255	-4.00411	-0.12063	-0.30935	-0.8913
-0.35512	-0.02818	0.089354	-0.293	-0.19391	0.008099	-0.25076	-0.20458
0.066685	0.482672	-0.29387	-0.89139	-1.04353	0.659931	0.351033	0.280744
-0.41561	0.016072	-0.07485	-1.26415	-1.62478	-0.05413	-0.29627	-0.68035
-0.24721	-0.08909	-0.03699	-1.08292	-1.75381	0.338967	0.269166	-0.33226
-0.73476	-0.30852	-0.61202	-3.01568	-3.35553	-0.15587	-0.43383	-0.7229
-0.25332	0.081603	0.183608	-0.98246	-1.50191	0.467019	0.213588	0.172829
0.329775	0.068532	0.288464	-0.44094	-0.43712	0.527233	0.617734	0.409897
-0.28337	-0.30133	-0.33836	-2.07407	-2.95812	0.407342	0.279042	-0.10313
0.00983	-0.06338	0.23953	-0.14851	-0.00882	0.158254	0.300738	-0.18823
-0.27057	-0.09816	0.188271	-1.01605	-2.19346	0.305529	0.186583	0.131409
-0.82617	-0.47709	0.236524	-1.33836	-1.83622	-0.0065	-0.26316	-0.28687
-0.12636	0.138628	-0.43393	-1.35552	-1.66793	-0.07184	-0.14942	-0.64911
-0.53933	0.037455	-0.15602	-1.52646	-2.05382	0.140277	0.101199	-0.08431
-0.12648	0.208325	-0.23873	-0.8477	-1.41278	0.384851	0.211776	-0.04168
-0.53428	-0.43461	-0.76186	-3.04927	-3.63319	-0.29986	0.041334	-0.79783
-0.35888	0.111702	-0.33231	-1.33922	-1.33332	-0.02264	-0.20623	-1.55784
0.14972	0.002346	0.216423	0.851351	0.661739	0.385454	0.336389	0.67661
-0.21563	-0.15251	-0.08957	-0.62243	-0.99435	0.24231	0.155856	-0.70519
-0.20508	0.112637	-0.18993	-1.57414	-1.96718	0.109107	0.17759	-0.18916
-0.01234	0.096195	0.570895	0.638868	0.511733	0.15831	0.354687	-0.00383
-0.81456	-0.53305	-0.47487	-3.63677	-4.05252	-0.2142	-0.60606	-1.55853
-0.32411	-0.46086	-0.12704	-1.4751	-1.35721	-0.13228	-0.24222	-0.34252
-0.68731	-0.34771	-0.11215	-2.83641	-3.19489	-0.04687	0.133233	-0.26897
-0.39414	0.094764	0.11049	-0.35474	-0.95685	0.051759	0.023855	0.125843
-0.2264	-0.27447	-0.3399	-1.39564	-1.24858	-0.17164	-0.43665	-0.39823
-0.04248	-0.17426	0.24999	-0.73489	-1.2007	0.340588	0.447136	0.193132
-0.72413	-0.6444	-0.36458	-2.76271	-2.80998	-0.26916	-0.27425	-1.09277
-0.27685	-0.50533	0.345141	-0.96659	-0.91418	0.448148	0.510779	-0.71788
-0.0396	0.093008	-0.36578	-0.97334	-1.72603	0.263359	0.420669	-0.09573
-0.40845	0.272956	-0.10467	-0.25409	-0.31688	-0.18468	-0.10192	0.08637
-0.52807	0.230312	-0.3654	-3.20812	-3.25963	0.366298	-0.43204	-1.52934
-0.52319	-0.15658	-0.56738	-2.81153	-3.25002	-0.3182	-0.12918	-0.76867
-0.16834	-0.12788	-0.25368	-0.70951	-1.25068	0.317894	0.402378	-0.08745
-0.61422	-0.30226	-0.20775	-1.5639	-1.71903	-0.49919	-0.1191	-0.04043
0.236692	0.022267	0.102512	-0.03707	-0.69224	0.279497	0.851817	0.924942
-0.36516	-0.81848	-0.61895	-1.18671	-1.61136	-0.57396	0.010147	0.21768
-0.39822	-0.0608	-0.15649	-1.27283	-1.46014	0.01901	-0.02218	-1.07459
-0.13481	-1.52783	0.021183	-0.86916	-1.16145	0.39712	-0.05048	-0.64927
0.083127	0.529333	0.012076	0.249818	-0.4307	0.18795	0.354772	0.396024
-0.34901	0.119213	-0.36451	-1.40487	-1.31453	-0.2207	-0.4733	-1.31989
-0.06077	0.000724	0.333985	-0.48274	-1.13453	0.312566	0.426266	0.476135
-0.01894	0.24381	0.071259	-0.29825	-0.14296	0.365517	0.003035	-0.73983
-0.03125	-0.08531	0.054666	-1.02287	-1.83097	0.34907	0.520523	0.136871
-0.07876	-0.0104	0.249607	-0.14566	-0.60113	0.186584	0.309108	-0.02489
-0.08226	-0.20874	0.343852	-0.41131	-0.81392	0.514656	0.547052	-0.1334
-0.11423	0.014453	0.228606	0.210466	0.417624	0.147244	0.131013	-0.06813
-0.13795	-0.25694	0.081828	-0.97747	-1.96442	0.47805	0.345244	-0.05559
-0.48003	-0.12716	-0.06539	-2.71906	-3.32282	0.027719	-0.30316	-0.88428
-0.18006	-0.13632	0.203059	-0.43151	-0.9632	0.069145	0.179759	0.252556
-0.71675	-0.50522	-0.41084	-3.31656	-4.11069	-0.20751	-0.54362	-1.06706
-0.51519	-0.33028	-0.01004	-3.30437	-3.93566	0.041172	-0.1123	-1.00839
-0.31411	-0.15724	-0.43827	-1.69405	-2.09211	0.102907	0.041178	-0.03181
-0.05557	-0.24408	0.068163	-0.357	-1.00084	0.212257	0.298969	0.624484
-0.22331	-0.1945	0.194394	-1.39391	-2.26212	0.327594	0.318383	-0.22362
-0.59872	-0.17683	-0.71215	-2.92965	-3.49338	-0.08275	-0.16201	-0.86738
-0.22077	-0.05558	-0.09973	-0.33567	-0.44838	0.106482	-0.21189	-0.12781
-0.39457	-0.14875	0.412518	-0.7829	-1.08585	0.357714	0.206338	-0.45089
-0.25825	-0.22825	0.133658	-1.52231	-2.34403	0.278693	0.251448	0.112832
-0.69514	-0.35632	-0.49182	-2.78144	-3.35976	0.108485	-0.25809	-1.02211
-0.41575	-0.59296	-1.13943	-3.08396	-3.43878	-0.09532	-0.02252	-1.63864
-0.2777	0.093638	-0.27034	-1.58802	-1.58873	0.401232	0.529674	-0.25087
-0.28921	-0.33607	-0.14277	-0.68259	-1.15493	0.155254	0.008405	-1.08332
-0.35685	-0.14058	-0.35196	-0.98576	-0.76372	-0.13032	-0.21539	-1.08543
-0.42565	-0.39428	-0.17676	-2.82677	-3.1197	0.149998	-0.09096	-2.33296
-0.64666	-0.18708	0.040507	-1.02659	-0.6603	0.109976	-0.24658	-0.81688
-0.56732	-0.58414	-0.61961	-2.92619	-3.61423	-0.35261	-0.37197	-1.36691
-0.58953	-0.04511	-0.3231	-2.44447	-2.50637	-0.11387	-0.63479	-1.24239
-0.11315	0.023128	0.162068	-0.39024	-0.12085	0.12697	-0.11428	-0.15761
-0.32164	0.179553	-0.35049	-1.11494	-1.04705	0.151925	-0.23631	-0.26731
0.221139	-0.15735	0.378037	-0.67761	-0.88948	0.191226	0.670916	0.371308
-0.31614	0.211021	-0.07435	-0.24112	-0.58982	-0.04439	-0.09057	-0.31934
-0.50015	-0.15204	0.111248	-2.49876	-3.05562	0.088208	-0.03056	-0.50668
-0.10821	-0.56649	-0.04444	-2.97115	-3.66222	0.084955	0.358939	-0.57411
-0.58507	-0.23275	-1.11047	-3.56459	-3.78597	-0.11275	-0.30468	-1.12437
-0.08878	0.096599	0.243742	-0.6243	-1.34918	0.247461	0.324161	-0.02398
-0.17961	0.059128	-0.02082	-0.29506	-0.57443	0.133594	0.070919	0.118955
-0.20395	0.100904	-0.03082	-1.01068	-1.83337	0.036204	0.456221	-0.04163
-0.32997	-0.02177	-0.13805	-1.87084	-2.42867	0.348688	0.402484	-0.183
-0.37569	-0.19778	-0.06737	-1.59654	-2.46808	0.458274	0.21009	-0.6877
-0.49418	0.034644	0.102837	-1.23265	-1.90492	0.086744	-0.09482	-0.76491
-0.10446	-0.04409	-0.0032	-0.92563	-1.49294	0.191546	0.410139	-0.11814
-0.0237	0.089119	0.188327	-1.20316	-1.97824	0.393437	0.631806	0.021513
-0.78564	-0.36268	-1.1862	-3.98092	-3.6983	-0.26103	-0.4998	-1.14484
-0.18105	-0.01378	0.153794	-0.33657	-0.5191	0.233923	-0.05853	-0.49649
-0.31963	-0.01372	-0.29143	-1.54793	-2.31329	0.400953	0.051309	-0.22432
-0.12492	0.062098	0.373924	-0.99336	-1.86142	0.453433	0.555905	0.526745
-0.08424	-0.37108	0.470316	0.668584	0.738449	-0.17271	-0.47934	-0.38573
-0.4122	0.238656	0.086583	-0.55747	-0.81777	-0.64869	-0.25707	0.014693
-0.30076	0.192344	-0.20003	-0.99448	-0.6685	0.355197	-0.2666	-1.31633
-0.45418	-0.09147	-0.04094	-2.49563	-3.31107	0.077895	0.333476	-0.29677
-0.15009	-0.0658	-0.17202	-1.27032	-1.90438	0.233406	0.230234	0.053285
-0.15132	-0.25939	-0.25023	-1.8289	-2.39681	0.310497	0.372857	-0.36855
-0.56392	-0.25304	0.032182	-0.93266	-0.81189	-0.16031	-0.44614	-1.10807
-0.24979	-0.02184	-0.12028	-1.52841	-2.34082	0.295891	0.426344	-0.10969
-0.32656	0.221818	-0.06024	-1.0599	-1.26277	-0.13283	-0.12921	0.324575
0.202627	-0.0783	-0.15713	0.188287	0.030347	0.32968	0.487483	0.759304
-0.54355	-0.24001	-0.28551	-3.25627	-3.16468	-0.15837	-0.37256	-1.56992
-0.78743	-0.23939	-0.32771	-3.57348	-3.95858	-0.13654	-0.16702	-1.05978
-0.2493	-0.03189	-0.30745	-1.35317	-1.25418	-0.0068	-0.02263	-0.61989
-0.49781	-0.42644	-0.42483	-2.99199	-3.7366	-0.09783	-0.02143	-1.15483
-0.232	0.030725	0.049789	-1.07079	-1.66242	0.158319	0.249902	0.136692
-0.19842	-0.00162	0.281005	-1.1692	-2.04849	0.259417	0.503182	-0.20044
-0.49763	-0.28722	-0.29921	-2.97848	-3.42894	-0.01762	0.095953	-0.97672
0.198037	0.021965	0.009934	0.308387	-0.63771	0.013985	0.526277	0.745906
0.067948	-0.10094	-0.04744	-2.12087	-2.32261	0.405842	0.679295	-0.29413
-0.43165	-0.28298	0.033159	-2.29092	-3.10197	0.256128	-0.00334	-0.3898
-0.16032	-0.6673	0.128645	-0.68313	-0.98934	0.153368	0.183536	-0.90709
-0.11257	-0.4776	0.023997	-0.8634	-1.47686	0.421227	0.486287	-0.04174
0.050413	-0.084	0.154236	-0.69393	-1.43152	0.67505	0.808058	0.492945
-0.36383	0.03145	-0.15801	-1.12371	-0.76557	-0.08423	-0.36534	-1.1388
1.86769	-0.27035	1.85787	2.36768	2.65238	0.183157	-0.40386	2.9688
-0.14186	0.198111	0.076958	-1.5383	-1.69604	0.193858	0.337424	-0.27178
-0.26552	-0.16637	-0.01997	-1.7263	-1.82811	0.159011	-0.01276	-0.74304
-0.29179	-0.06222	0.054881	-0.88857	-1.61952	0.132221	0.126669	0.208053
0.129553	0.08367	-0.12762	-0.09169	-0.86117	0.071997	0.487285	0.649599
-0.37631	-0.0722	-0.18548	-0.98027	-1.76177	0.102437	0.193193	-0.03058
-0.26994	-0.17071	-0.11103	-1.73983	-2.41757	0.321031	0.343438	-0.04098
-0.22266	0.211917	-0.51229	-1.00512	-1.3138	0.121529	-0.1334	-0.70424
-0.04192	-0.00505	0.107637	-0.95587	-1.80593	0.685274	0.465923	0.022921
-0.60278	0.044302	-0.43714	-2.42987	-3.03111	-0.04557	-0.28519	-1.16535
-0.49313	0.034576	-0.34979	-1.00458	-1.22462	-0.1968	-0.48139	-0.71478
-0.67799	-0.6472	-0.41581	-1.23001	-1.39319	-0.10353	-0.29089	-1.43744
-0.36901	0.031191	0.0294	-0.26353	-0.14838	0.132727	-0.187	-0.2975
-0.78502	-0.53835	-0.52202	-3.873	-4.46297	-0.26816	-0.33486	-1.69927
-0.44531	-0.28019	-0.04666	-3.18635	-3.74626	0.055716	0.073958	-1.02618
-0.3674	0.129559	-0.34131	-1.41119	-1.07632	0.41843	-0.13162	0.089384
-0.28706	-0.07175	-0.66927	-1.68829	-2.07985	-0.17466	-0.16694	0.120894
-0.67344	-0.29872	-1.25812	-3.53829	-3.78659	-0.13817	-0.12989	-0.83319
0.29804	0.402835	0.787033	0.201692	-0.63771	0.885654	1.10007	0.488049
-0.39399	-0.31355	0.248351	0.292848	0.073269	-0.30963	-0.38116	0.19811
-0.07858	-0.19772	-0.17579	-0.08973	-0.71928	0.113456	0.264272	0.086943
-0.49057	-1.20101	-0.13992	-0.97539	-1.47397	-0.27351	-0.59516	-1.12976
-0.46054	0.080511	-0.18072	-2.07971	-2.04677	-0.03593	-0.1652	-0.9185
-0.31793	-0.70425	-0.12549	-0.59936	-0.76848	-0.25084	0.075323	0.076368
0.121983	-0.38534	-0.24533	-0.78996	-0.88286	0.401611	0.533929	0.32547
0.128204	0.298038	0.193483	-0.43328	-1.28206	0.443869	0.506422	0.28629
-0.2241	-0.01897	0.164942	-1.02806	-1.57251	0.394187	0.506238	0.056574
-0.03619	-0.48573	0.069669	-0.31773	-1.25179	0.158203	0.293736	0.412394
2.0844	0.270523	0.007614	2.55562	2.92979	-0.18509	0.177033	3.17389
0.801983	2.78991	1.54143	3.09638	2.44073	0.36851	0.54307	0.866681
-0.20013	0.166347	-0.2222	-1.92774	-2.34505	0.033671	0.12127	-0.644
0.11607	-0.52425	0.245384	0.033262	-0.75095	0.372419	0.603219	0.043083
0.074999	-0.20081	0.108417	-0.13486	-0.47317	0.122466	0.002797	0.789062
0.017499	-0.48946	0.149164	-0.54638	-0.89868	0.341912	0.427845	-0.3152
-0.95183	-0.00152	-0.46214	-2.04996	-2.35166	-0.29642	-1.04164	-0.61201
-0.1969	0.104054	0.08793	-0.82491	-0.41507	0.05701	0.126031	-0.18552
-0.61449	-0.41509	-1.09086	-3.44173	-3.88308	-0.09884	-0.15557	-0.97296
-0.41246	-0.16188	-0.1893	-2.00485	-2.13199	0.071382	-0.15872	-1.17395
-0.0665	-0.36739	-0.04772	-0.96246	-1.72876	0.082776	0.445621	0.041131
-0.66378	-0.47585	-0.68585	-2.4646	-2.93226	-0.39992	-0.26859	-0.58298
0.21155	-0.57923	0.146412	-0.96734	-0.34572	-0.50814	0.339385	0.15437
-0.08693	-0.27555	0.229337	-0.76919	-1.45503	0.474779	0.575141	0.112483
0.070216	-0.00282	-0.09901	-0.56571	-1.45957	0.306136	0.49905	0.543589
-0.09864	0.172347	-0.40001	-0.28929	-0.77592	-0.03622	0.127169	0.622919
-0.17981	0.029745	0.039004	-1.02822	-0.98913	0.130099	0.112487	-0.16062
-0.34782	-0.22904	0.022274	-0.75811	-0.61408	-0.19386	-0.40475	-0.04296
-0.23748	0.070772	-0.24829	-0.67395	-1.18984	0.294702	-0.27582	-0.87146
-0.3058	0.409122	-0.6533	-1.42336	-1.35907	-0.15493	-0.2014	-0.28052
-0.13758	0.028913	-0.24407	-0.85806	-1.44788	0.439936	0.272696	0.149768
-0.34688	-0.20185	0.095515	-0.18656	-0.10025	-0.05941	-0.1022	-0.48851
-0.65139	-0.04718	0.087323	-1.5014	-1.62419	-0.1065	0.07204	-0.08931
0.032915	-0.06163	0.129856	-0.39811	-1.03498	0.315698	0.698699	0.515881
-0.22981	0.122749	0.056541	-1.52899	-1.25045	0.169121	-0.00031	-0.72464
-0.16042	-1.02867	0.080716	-0.23166	-1.28442	0.150692	-0.00699	-0.4617
-0.37269	-0.32707	-0.37588	-0.98113	-1.43618	-0.04467	-0.02804	-0.47444
0.584087	0.684838	-0.17343	1.52828	1.25054	-0.5606	-0.0967	0.896397
-0.03164	-0.11041	0.096481	-1.20749	-1.98545	0.435339	0.497164	-0.00825
-0.07574	0.224806	0.19204	0.398515	0.70578	0.404104	0.094765	0.081246
-0.11129	-0.19798	0.482526	-1.28488	-2.17976	0.513133	0.487025	-0.05382
-0.12681	-0.03488	-0.39669	-1.04564	-1.02425	0.407971	0.410741	-0.50201
-0.21585	-0.00734	-0.35208	-1.50868	-1.51242	-0.05992	-0.25987	-0.64448
-0.08494	-0.05115	0.077302	-1.22784	-1.37267	0.350309	0.123116	0.154611
-0.06795	-0.20868	0.077891	-0.28468	-0.81439	0.352576	0.379048	-0.31369
-0.03474	-0.09948	-0.03973	-0.36054	-0.19654	0.172019	0.313496	-0.6411
-0.13909	-0.49536	-0.36596	-0.6665	-1.57372	0.129882	0.028418	-1.01149
-0.30057	0.086806	-0.07532	-0.97905	-1.31382	0.278901	0.103871	-0.15193
-0.19286	0.215302	0.138538	-0.43102	-0.48927	0.01243	-0.07452	-0.51483
-0.4701	-0.08906	-0.22477	-2.18389	-2.96704	0.304455	0.008156	-0.76302
-0.00013	-0.22437	0.087687	-0.62522	-1.2688	0.420518	0.5859	0.180957
-0.20693	-0.07546	0.104793	0.691907	0.504872	0.302098	0.204414	-0.03164
-0.13947	0.094961	-0.14009	-1.60226	-1.98662	0.021021	0.196967	-0.08825
-0.59606	-0.02355	-0.18117	-2.69445	-2.78175	0.331601	0.038265	-0.54774
0.025682	0.147725	0.56704	-0.24302	-0.84229	0.38353	0.554763	0.319483
-0.66289	-0.46803	-0.19043	-3.50371	-3.65676	0.093036	-0.15831	-1.08699
-0.32468	-0.11886	0.201104	-1.17473	-1.34236	0.195434	0.13815	-0.79761
-0.71734	-0.42356	-0.22916	-3.68885	-4.05801	-0.14507	-0.41134	-0.73682
-0.63322	-0.20003	-0.46081	-1.99117	-1.7559	0.340871	0.143799	-0.35734
-0.193	0.153086	-0.27875	-0.85108	-1.72401	0.365375	0.235855	-0.03302
-0.29901	-0.11056	-0.25107	-1.24351	-1.56658	0.399171	0.076816	-0.69526
-0.19306	-0.13304	-0.00797	0.02182	0.310155	0.08205	-0.21745	-0.41252
-0.60175	0.152177	-0.35816	-1.52581	-1.74521	0.313839	0.073957	-1.14725
-0.20666	-0.21287	-0.08724	-1.00997	-1.5288	0.249479	0.26332	-0.04729
-0.0348	-0.09992	0.079779	-0.12042	-0.46695	0.471276	0.404472	0.023297
-0.21095	0.006476	0.034901	-0.85582	-1.2673	0.038183	0.247076	0.229787
-0.54145	-0.0131	-0.24327	-1.41147	-1.35478	0.065104	-0.26226	-1.16076
-0.38659	0.120725	-0.49992	-2.82978	-2.97773	-0.08665	-0.00177	-0.64914
-0.01442	-0.08201	-0.04228	-1.6938	-2.30422	0.383015	0.68919	-0.00339
0.045601	-0.63549	0.255902	0.116302	-0.32763	0.186182	0.23724	-0.03853
0.017763	0.101884	-0.14258	-0.88858	-1.34421	0.337724	0.637928	0.156878
0.423019	-0.26676	0.01821	0.119082	0.364906	-0.11293	-0.3673	1.96574
-0.14111	-0.12446	0.099219	-0.68957	-1.06401	0.062959	0.281407	0.12212
-0.27445	-0.2531	-0.39155	-0.54251	-0.796	0.078003	-0.18184	0.170274
-0.24476	-0.07208	-0.23027	-1.77538	-1.92481	0.11488	-0.11977	-1.04658
-1.01801	-0.66901	-1.23397	-4.74177	-4.9332	-0.29398	-0.868	-1.9021
0.07057	0.210299	-0.6415	0.093645	0.016017	-0.55675	-0.4589	0.097403
-0.31421	0.117595	-0.06115	-0.81546	-1.51016	0.307543	0.324242	-0.11234
-0.21865	-0.31205	-0.20449	-2.83412	-3.26363	0.051192	0.346258	-0.49459
-0.27732	0.104112	-0.35261	-2.36872	-2.22529	-0.18366	-0.38807	-1.51836
-0.3515	-0.03539	-0.12793	-1.69904	-2.07484	-0.03778	-0.07551	-0.81864
-0.08134	-0.03396	-0.19919	-0.29789	-0.27321	0.143317	0.374492	0.544368
0.0115	-0.00985	-0.05759	-0.41166	-0.80156	0.253748	0.280244	0.285109
-0.84803	-0.43028	-1.59793	-2.65454	-3.03339	-0.94538	-1.27332	-0.85557
-0.03466	-0.06864	0.080017	0.209098	0.627987	-0.02209	-0.02297	0.250672
-0.08621	-0.11586	0.071971	-0.07012	-0.01306	-0.19858	0.15355	0.220749
-0.3237	-0.04788	-0.07881	-1.36884	-1.209	-0.10658	-0.2636	-1.18997
0.078468	-0.03135	0.249401	-0.31606	-1.18745	0.299018	0.630453	0.514436
-0.03912	-0.84264	-0.19352	0.092189	-0.55927	0.087789	0.252253	0.570098
-0.05043	-0.02321	-0.05894	-0.24654	-0.70012	0.12536	0.047096	0.293926
-0.46076	-0.00776	0.404693	0.290135	0.277932	-0.06531	-0.45926	-0.54616
-0.50509	-0.47499	-0.41497	-1.34371	-2.2932	-0.27194	-0.21377	-0.25654
-0.26687	0.008794	0.033685	-0.71853	-1.34398	0.0102	0.172495	0.120728
-0.24471	-0.06996	0.277642	-0.18697	-0.16732	-0.10414	0.071802	0.245768
-0.20955	-0.06601	-0.09276	-1.01639	-1.03115	0.233019	0.047773	-0.46992
-0.20561	-0.00163	0.095841	-1.21131	-2.05418	0.322819	0.295043	0.027565
-0.10402	-0.10903	-0.11605	-1.26584	-1.71795	0.303238	0.412027	-0.25768
-0.30896	-0.02394	-0.17071	-1.05839	-1.84145	0.165659	0.233074	-0.37972
-0.66405	-0.6803	-1.32578	-3.81938	-3.65202	-0.20058	-0.31804	-1.19802
0.220085	-0.04386	-0.04507	-1.0896	-1.73512	0.371701	0.84296	0.488713
-0.19074	-0.06628	0.108604	-0.43005	-1.427	0.521039	0.535267	-0.17641
-0.90811	-0.05325	-0.19947	-2.80997	-2.91084	-0.27406	-0.46317	-0.14197
-0.67741	-0.33853	-1.31764	-4.60491	-4.53912	-0.16235	-0.34276	-1.19087
-0.50519	-0.36609	-0.14955	-1.76681	-2.02914	0.210903	-0.25517	-1.86944
0.239684	-0.06074	0.373582	-0.79277	-1.55128	0.588766	0.814068	0.442981
0.128294	-0.21135	0.212949	-1.87643	-2.16216	0.632	0.905874	1.01484
-0.17432	0.102967	-0.27469	-0.91535	-1.57496	0.124259	0.226726	0.463543
0.079691	0.163772	0.465155	-0.11018	-0.51934	0.382424	0.645486	0.951392
0.490672	0.054493	-0.11668	0.271216	-0.1486	0.401264	0.837952	1.42833
-0.15081	0.118351	-0.15282	-1.44264	-1.97589	0.367814	0.329062	-0.22535
-0.75425	0.083798	-0.24137	-1.46567	-1.87491	-0.03658	-0.60039	-1.08624
-0.57952	-0.05277	-0.15159	-2.9701	-2.40829	0.145898	-0.1534	-2.11913
-0.17127	-0.72832	-1.08964	-2.76475	-3.86224	0.093996	0.31195	0.23422
-0.15003	-0.16728	0.010221	-0.93483	-0.97061	0.016132	0.196531	-0.10278
-0.31223	-0.16843	-0.56294	-2.6683	-3.00037	0.05435	0.373306	-1.04
0.065841	0.350001	-0.27332	-1.01273	-1.35635	0.143903	0.171299	0.406224
-0.40937	0.233303	-0.21908	-1.27269	-0.77917	0.055136	-0.15048	0.174811
-0.13895	-0.23768	-0.24936	-1.40006	-2.00747	0.100458	0.170284	-0.06927
-0.6826	-0.51	-1.02757	-3.49957	-4.40134	-0.11484	-0.25982	-1.17103
-0.37772	-0.24556	0.007063	-1.44456	-2.12636	0.194323	0.291981	-0.19398
0.134468	-0.24132	0.026024	-0.73803	-1.40702	0.616865	0.730674	0.57151
-0.08211	-0.46876	0.354627	-0.53527	-1.02749	0.117087	0.347676	0.215638
0.105811	-0.10942	-0.39271	-0.09484	-0.29214	0.011714	0.021887	0.324646
-0.00395	0.213966	-0.04893	-0.27386	-0.39747	-0.01631	-0.02685	-0.52846
-0.02	0.02291	0.203455	-0.41009	-0.39085	0.078364	0.273876	0.139194
-0.10102	0.264523	0.016942	-0.66971	-1.09732	0.07805	0.305404	0.006057
-0.71249	-0.73422	-0.16172	-3.21185	-4.29383	-0.05313	-0.25067	-1.06128
-0.20706	-0.07992	-0.07636	-0.37439	-0.47516	0.030861	-0.22313	-0.21928
0.306649	-0.35339	0.548051	1.12835	0.846532	-0.25054	0.23355	1.33251
-0.11415	-0.04358	0.074795	0.506508	0.075725	0.22012	0.068069	0.76969
0.271618	0.14909	-0.03964	-0.30368	-0.35786	0.350669	0.766929	0.360604
-0.0549	0.048239	0.086879	-1.14579	-1.19193	0.008123	0.354503	0.139771
-0.25257	0.035769	-0.22871	-1.27963	-1.42772	0.027491	-0.0465	-0.35805
-0.54624	-0.34472	-0.66908	-2.95585	-3.59217	-0.14606	-0.02902	-1.1525
0.139118	-0.09704	0.339808	0.223318	0.156927	0.405535	0.458777	0.323833
-0.09155	-0.01487	-0.14113	-1.52997	-1.3819	0.17267	0.114319	-1.47048
-1.31375	-1.52793	-0.9221	-2.17729	-2.73097	-3.43384	-2.20219	-1.96862
-0.06134	-0.58696	0.026463	-1.0926	-1.30834	0.213652	0.245421	-1.42262
-0.27645	-0.57768	-0.14349	-3.02751	-3.2583	-1.36015	-0.42906	-1.35922
-0.26809	0.249713	-0.04639	-0.41406	-0.63527	-0.02531	-0.27572	-0.53619
-0.29357	-0.35203	-0.23666	-1.58558	-2.24458	0.333022	0.177581	-0.71814
-0.08798	-0.79639	-0.27232	-0.04106	-0.40416	0.129966	0.387962	0.088972
-0.20965	-0.22184	-0.05565	-0.61015	-0.72718	0.130889	0.029513	-0.54163
0.090902	0.053129	0.182175	-0.66751	-0.95545	0.4862	0.755224	0.191459
0.018376	-0.01839	0.103534	-0.58717	-0.97787	0.331444	0.61759	0.243537
-0.76352	-0.48468	-0.29668	-2.88559	-3.35014	-0.20966	-0.54866	-0.80665
-0.27323	-0.02081	-0.20376	-1.1461	-1.72591	0.19182	0.291507	-0.36413
-0.27944	0.427836	-0.02073	-0.79119	-0.11246	-0.21813	-0.49369	-0.75391
0.04028	0.094328	0.193869	-0.58298	-1.12269	0.131766	0.33393	0.328707
-0.05761	-0.09553	0.165311	-0.24825	0.100333	0.124894	0.079949	-0.14057
-0.27924	-0.3343	-0.22657	-1.82753	-1.58831	0.192502	0.053868	-0.80066
-0.09899	0.121505	-0.31032	-0.90242	-2.15591	0.557651	0.309726	0.074021
-0.34398	0.092697	-0.27079	-0.78941	-1.25853	0.152058	-0.02042	-0.42245
0.149113	-0.15919	0.273041	0.80654	0.372254	-0.04934	0.211377	0.105636
-0.41238	-0.21919	-0.04786	-1.05816	-1.27842	-0.09137	0.034245	-0.02484
-0.22645	0.111775	-0.12944	-1.04175	-1.40443	0.2072	0.232573	-0.12353
0.069388	0.145959	0.23197	-0.59337	-1.00601	0.355709	0.512099	0.52761
-0.40835	-0.07767	-0.26307	-1.53755	-1.81994	-0.01271	-0.53985	-0.59875
-0.32605	0.094386	-0.18081	-1.63421	-2.28172	0.578559	0.154391	-0.18918
-0.91485	-0.48428	-0.22824	-2.40231	-2.12644	0.145583	-0.40976	-1.48096
-0.01058	0.098344	-0.27209	-0.96116	-1.4049	0.14564	0.268764	0.019963
-0.7451	-0.46653	-0.88616	-3.93169	-4.15294	-0.20318	-0.33682	-1.57476
-0.50206	0.031068	-0.2407	-0.81794	-1.1719	0.151571	0.199483	0.281265
-0.2588	0.092354	-0.09805	-0.06208	0.086324	-0.11767	-0.18944	-0.15556
-0.10352	0.138056	-0.20125	-0.91348	-1.23653	0.008678	-0.27735	-0.2476
-0.1246	0.116631	-0.13814	-1.03999	-0.6212	0.217412	-0.3815	-0.6232
-0.21567	0.131152	0.125518	-0.25851	-0.34119	-0.01154	-0.08372	-0.20606
-0.40242	-0.01103	0.023619	-0.62468	-0.84063	0.417194	-0.13374	0.171641
0.189619	-1.047	0.011603	0.016117	0.099617	-0.47312	-0.20496	0.451961
-0.58152	-0.3049	-1.21195	-3.57004	-3.50507	0.023696	-0.21181	-1.35106
-0.43271	-0.05363	-0.84482	-1.87711	-2.17599	-0.20171	-0.32601	-0.67866
0.181019	0.191963	0.315621	2.20581	1.52207	0.885345	0.645277	0.726637
-0.06852	-0.12588	-0.10223	-0.07302	-1.11356	0.49808	0.410798	0.099402
-0.4147	0.063728	-0.3986	-1.60038	-1.80227	0.093101	-0.47985	-0.85432
0.062937	-0.31855	0.002903	0.190439	0.185276	0.192427	-0.16583	-0.06131
-0.66782	-0.49704	-0.24204	-2.53079	-3.11448	-0.12329	-0.41876	-0.21603
-0.38726	-0.04638	-0.33461	-1.49357	-1.81621	-0.06088	-0.17227	-0.58918
-0.23756	0.058708	0.111096	-0.5741	-1.30149	0.377839	0.381146	0.285351
-0.20938	-0.12638	0.187475	-1.17505	-1.25937	0.222417	0.238325	0.098413
0.112535	0.330817	0.370288	0.326685	-0.61862	0.725332	0.602617	0.735959
-0.2594	0.168052	-0.08329	-1.04385	-1.41195	-0.07166	-0.08194	0.255466
-0.12229	-0.15995	0.282342	-0.70119	-1.05182	-0.11412	0.36073	0.050442
-0.42747	0.00953	-0.06155	-2.47876	-3.10447	0.322858	0.008656	-0.68879
-0.10822	0.054954	-0.01738	-1.04444	-1.60506	0.339632	0.336851	0.575021
0.130328	-0.36729	-0.33473	-0.39113	-1.00342	0.045413	0.014519	0.265908
-0.26876	-0.03454	-0.3453	-1.46974	-1.57047	-0.00564	-0.1376	-0.79149
-0.68434	-0.26248	-1.56765	-2.86313	-3.36541	0.146294	-0.15143	-0.8115
-0.18654	-0.23555	-0.27316	-0.8908	-0.55618	0.034766	-0.17287	-0.34432
-0.36568	0.11137	-0.64141	-1.6085	-2.42613	0.558163	-0.09395	-0.9953
-0.53811	-0.22507	-0.71046	-3.32292	-3.5581	0.000849	-0.22398	-0.68207
-0.49204	-0.24319	-1.15642	-3.50018	-3.84524	0.075944	-0.03467	-1.09128
-0.11501	-0.23584	-0.08061	-0.95294	-1.38005	-0.03627	-0.34012	-0.07306
-0.01789	0.22766	0.059686	-0.58295	-0.14567	-0.1238	-0.07868	0.102561
-0.35052	-0.01372	0.102747	-1.39395	-1.70127	0.152286	-0.01419	-0.79023
-0.38279	-0.36441	-0.23406	-2.77606	-3.51705	0.023449	0.365659	-0.82126
-0.30568	-0.1662	-0.52462	-2.71477	-3.4352	0.061086	0.077342	-0.49747
-0.6743	-0.31016	-1.35038	-4.08588	-4.26447	-0.14421	-0.29508	-1.16305
-0.14552	-0.02569	-0.30222	-0.93759	-0.86412	0.09723	0.416173	-0.43983
-0.43864	-0.16128	-0.16856	-1.82303	-2.0692	0.252079	-0.26122	-1.05232
-0.45179	0.043465	-0.11729	-1.89101	-2.25042	0.100531	-0.25824	-1.00498
-0.07145	0.084252	0.413678	1.10803	1.27676	0.666583	0.606283	0.190711
-0.25881	-0.05574	-0.11562	-1.92538	-1.71119	0.031025	0.065122	-0.60685
0.04129	-0.00184	-0.01376	-0.50992	-0.94783	0.051389	0.390118	0.166837
0.126283	0.932392	-0.46996	-0.07729	0.381524	-0.48474	0.1703	-0.58512
-0.23759	0.204049	-0.63036	-2.02009	-2.84708	0.073142	-0.34897	-2.09166
0.001002	0.265499	-0.13768	-1.43875	-2.10451	0.329521	0.404469	0.016501
-0.40729	-0.77149	-0.18388	-1.07796	-1.64828	0.382451	0.412505	-0.31013
-0.53456	-0.54647	-0.43272	-2.83063	-3.08414	-0.28185	-0.25049	-1.19644
-0.19036	-0.13091	0.171222	-0.60217	-1.36412	0.052978	0.309897	-0.16734
-0.35264	-0.36241	-0.2496	-0.86009	-1.58008	0.037969	-0.26467	-1.18672
-0.12323	0.042897	-0.05419	-0.49762	-0.18577	-0.0188	-0.00147	-0.60791
-0.34366	0.039227	-0.22273	-1.51897	-2.16749	0.333362	0.323993	0.180131
-0.15285	-0.05089	-0.19488	-1.19031	-1.56952	0.170414	0.087195	-0.08351
0.113231	0.000952	0.23579	-1.03246	-1.00874	0.163307	0.291638	-0.21508
-0.08278	-0.20295	0.202094	-0.69438	-0.85672	-0.08614	0.344208	0.399739
1.01384	-0.57473	0.372448	0.365234	0.739853	-0.12009	-0.42611	1.77047
-0.10821	-0.56649	-0.04444	-2.97115	-3.66222	0.084955	0.358939	-0.57411
0.111466	-0.00788	0.30955	0.153399	0.26378	0.135376	-0.07622	-0.15551
0.132954	-0.20477	-0.07085	-0.75491	-1.48403	0.349642	0.788316	0.015127
-0.28859	0.093872	0.038467	-0.23077	-0.60723	0.069661	-0.09276	0.003142
-0.20247	-0.25316	-0.22741	-1.19517	-1.70747	0.081102	0.353078	0.325477
-0.23347	-0.07954	-0.11753	-0.92632	-0.48396	-0.15796	-0.19532	-0.23241
-0.29439	0.213307	0.00522	-1.00287	-1.59582	0.347932	0.210269	-0.21521
-0.75274	-0.26777	-1.02327	-3.40563	-3.61757	-0.01644	-0.32493	-1.49857
-0.41257	0.007579	-0.3162	-2.02664	-2.32563	0.140978	-0.06102	-0.44487
-0.17073	-0.03078	0.111107	-0.21239	-0.6168	0.154502	-0.01671	-0.83198
-0.16255	-0.23183	0.468151	-0.14016	-0.40173	-0.0925	0.102809	-0.7694
0.034573	-0.41994	0.141907	0.210524	-0.51731	0.200476	0.345302	-0.18525
-0.80703	-0.63163	-0.17909	-1.8352	-2.53622	0.48349	-0.77965	0.738541
-0.66621	-0.49473	0.055196	-2.73656	-3.75411	0.148294	-0.25849	-0.72118
-0.04471	-0.01245	0.042303	-1.40685	-2.05591	0.080406	0.260879	0.2732
-0.57335	-0.32081	-0.22813	-3.29485	-3.88892	-0.03807	-0.1162	-1.04573
-0.5402	0.144131	-0.6048	-2.79518	-2.63341	0.026528	-0.22926	-0.48718
0.069479	-0.09881	-0.13569	-0.09389	-0.06054	-0.16301	-0.06678	-0.06108
-0.54395	-0.08831	-1.17023	-3.60196	-3.53789	0.007236	-0.00263	-0.85959
-0.33668	-0.06674	-0.08359	-1.69512	-1.40659	-0.20694	-0.301	-1.17498
-0.27001	-0.07085	-0.34344	-1.71794	-1.36099	-0.02738	-0.29545	0.115654
-0.14107	-0.82716	0.019582	-0.44449	-0.84754	-0.3922	-0.30961	-0.73785
0.045363	-0.17953	0.063299	-0.95644	-1.39036	0.404403	0.57652	0.364436
-0.36423	-0.27282	-0.38773	-0.51907	0.066244	-0.07725	-0.53458	-0.3694
-0.54204	-0.3008	-0.24464	-2.85305	-3.25334	0.172793	-0.22714	-0.81151
-0.01683	0.251395	-0.30026	0.071928	-0.35465	0.271311	0.700479	0.322529
-0.00421	-0.09753	-0.03539	-0.623	-1.2073	0.364056	0.507031	0.434805
0.419862	0.582766	0.432115	0.197179	0.121893	1.02443	1.21595	1.05283
-0.13754	-0.44519	0.016402	-1.6002	-2.26719	0.273509	0.446286	0.021729
-0.48936	0.112149	-0.82222	-2.54662	-2.45209	0.065386	-0.29888	-0.99077
-0.10527	0.22202	-0.12426	-1.79456	-1.86991	0.239967	0.229263	0.078578
-0.20299	-0.07574	-0.07297	-0.45509	-0.69216	0.166533	0.285398	0.354014
-1.33528	0.014794	-0.72787	-2.48365	-2.45954	-0.52157	-1.40666	-2.10298
-0.10946	-0.03215	-0.19419	-1.04232	-1.57269	0.072132	0.488912	0.260869
0.230401	0.063338	0.342417	0.631222	0.110446	0.647385	0.842468	0.432874
-0.4236	0.333401	-0.72005	-2.18191	-2.5178	0.089865	-0.3652	-1.32552
-0.45457	-0.1647	-0.26013	-1.38761	-1.70366	0.041409	0.045106	-0.7803
-0.02828	-0.1617	0.584907	-0.62858	-0.62484	1.15688	1.09406	0.889952
-0.02068	1.1704	0.233751	-0.50157	-0.39718	0.210814	0.610582	0.790439
-0.05928	0.836736	-0.04937	-0.44125	0.148079	-0.00951	-0.02477	-0.0664
-0.00595	-0.10959	0.13291	-1.31617	-2.0437	0.356412	0.455811	0.216053
0.068769	-0.4061	0.257001	-0.16445	-0.35236	0.34103	0.427103	0.173483
-0.64033	-0.17216	-1.18135	-3.64461	-3.6929	-0.07417	-0.00113	-0.65528
0.086294	0.132831	-0.0036	-0.02356	-0.7016	0.30055	0.427836	-0.25902
0.169652	-0.39207	0.207948	-0.40315	-0.2967	-0.09139	0.182034	-0.03292
-0.14427	0.045492	-0.10242	-0.8607	-0.59371	-0.06719	0.058858	0.192382
-0.08555	-0.10978	-0.06859	-0.98334	-1.76684	0.175277	0.1895	-0.14278
-0.26069	-0.1082	0.166914	-0.90265	-1.18715	0.310574	0.103816	-0.21674
-0.21943	0.013144	-0.12614	-0.79521	-1.1026	-0.1734	-0.0685	-1.00759
0.115126	0.118628	0.079886	0.502814	0.804678	-0.07025	0.050409	0.575486
-0.02156	-0.10777	0.051238	-0.63909	-1.25631	0.376179	0.696784	0.406496
-0.16167	-0.2218	0.178509	-1.78654	-2.37321	0.234152	0.385126	-0.06742
-0.07353	-0.2147	0.070032	-1.14741	-1.90766	0.491523	0.471248	-0.15026
0.481386	0.855933	-0.11861	1.3566	0.469577	-0.21161	-0.21962	1.84118
0.106779	0.26593	0.215925	-0.18536	0.239182	0.41474	0.419749	0.306131
-0.15582	-0.14348	0.063472	-0.98618	-1.64924	0.158056	0.279046	0.06153
-0.13837	-0.29951	-0.02763	-0.97068	-1.40831	0.079997	0.298504	-0.10487
0.230401	0.063338	0.342417	0.631222	0.110446	0.647385	0.842468	0.432874
0.516327	0.136333	0.066986	-0.30543	0.216394	0.296573	0.49722	0.101739
-0.27936	0.071841	-0.33276	-0.81123	-0.8818	-0.02046	-0.08721	-0.67279
-0.1579	-0.23744	0.120876	-1.00045	-1.5051	0.171072	0.406379	0.173637
-0.00601	-0.03697	0.282727	0.055126	-0.20219	0.052454	-0.21532	0.259319
0.211929	0.084316	0.362008	-0.32963	-0.99782	0.112404	0.444927	0.786008
-0.18042	-0.15738	-0.39698	-1.29448	-2.07715	0.32072	0.430838	-0.38173
-0.22083	0.094044	-0.27239	-0.9393	-0.91948	-0.0944	-0.14816	-0.83731
-0.61416	0.369629	-0.35913	-0.95095	-0.36193	-0.04896	-0.10329	0.392942
-0.19207	-0.10573	0.162546	-1.27234	-1.36765	0.077255	0.114623	-0.54116
0.605762	-0.51282	0.264288	0.141631	0.142869	0.009595	-0.11467	1.40912
0.011765	-0.42075	-0.17123	-0.60342	-1.05599	0.302981	0.382739	-0.18363
-0.22454	0.14811	0.069758	-0.34885	-0.51409	0.199118	0.211569	-0.95202
-0.34293	-0.03247	-0.29	-1.80359	-2.02554	0.248328	0.094086	-0.62048
-1.04199	-1.04119	-0.59062	-0.74638	-1.23707	-1.04491	-0.90677	-1.70375
-0.5895	-0.32357	-2.03039	-4.69027	-4.09446	-0.18044	-0.21125	-1.0209
-0.02345	0.025285	0.020326	-0.80964	-1.41602	0.606043	0.987353	0.270686
-0.17051	-0.08509	0.063787	-1.02167	-1.6477	0.101488	0.283614	0.136461
0.040143	-0.0737	0.560164	0.50409	0.68821	0.16021	0.191349	0.628965
-0.5542	-0.27604	-0.71162	-3.21176	-3.61033	-0.15889	-0.19352	-1.07934
-0.0353	-0.17096	-0.05788	-1.31521	-1.98783	0.326221	0.399415	-0.05032
-0.53265	-0.22865	-0.22152	-1.58449	-1.85581	0.266011	-0.22464	-0.58933
-0.20312	0.191208	-0.21043	-0.25662	-0.22078	-0.03983	-0.16975	-0.30722
-0.37673	-0.65408	0.408354	-3.35296	-3.87816	1.21805	1.07725	-1.09568
-0.33158	-0.49759	-0.37009	-1.3174	-1.61625	-0.02109	-0.0728	-0.36629
-1.00508	-0.32403	-0.64858	-3.27501	-3.56439	-0.17486	-0.59184	-1.40496
-0.64363	-0.11967	-0.25105	-1.61396	-2.05317	-0.08038	-0.29307	-0.05908
-0.07929	-0.11669	0.301282	0.550127	0.498391	0.198781	-0.03094	0.241956
-0.45446	-0.08956	-0.87863	-3.35696	-3.54965	0.055336	0.01758	-0.94825
-0.4131	-0.19104	-0.29375	-2.63915	-2.89475	0.162222	-0.06425	-1.08895
-0.57453	0.073266	-0.02141	-1.65349	-1.80198	0.008214	-0.29949	-1.88443
-0.39858	0.062769	0.065446	-0.85431	-1.11032	-0.12135	0.001186	0.356365
-0.32886	-0.10759	-0.29254	-2.73616	-2.38722	-0.13759	-0.02591	-1.53284
-0.31625	-0.69277	-0.16789	-0.81354	-1.1072	-0.44124	-0.41375	-0.68859
0.004511	-0.21512	0.158286	-1.38387	-1.36783	0.512139	0.770194	0.285453
-0.25799	-0.26248	-0.09318	-1.36787	-1.17872	-1.13107	-0.45825	-0.36829
-0.20039	-0.60785	0.158809	-0.7408	-2.04329	0.334671	0.498871	0.251109
-0.20605	-0.46154	-0.24652	-1.17494	-2.01377	0.257793	0.472755	0.05688
-0.14785	-0.20467	-0.34802	-1.38351	-1.2235	-0.64931	-0.51114	-1.23766
0.128815	0.622132	1.22926	0.770256	0.051091	0.80152	0.920864	0.801686
-0.05062	-0.2002	0.301606	-0.66428	-1.11173	0.400807	0.454287	0.274854
-0.15473	-0.07812	-0.2951	-0.65688	-1.69448	0.485394	0.28781	-0.00476
-0.28161	-0.12058	0.015972	-0.9686	-1.33811	0.049959	0.044068	-0.81218
0.755261	0.840065	0.961564	1.03374	0.418071	0.769644	1.53583	0.851318
-0.24255	-0.09566	0.431244	-1.24879	-1.8209	0.169318	0.243161	-0.36087
-0.13746	-0.03797	0.128386	-1.45326	-1.52468	0.513144	0.834819	0.46487
-0.1403	0.32737	-0.57588	-1.71654	-1.81454	0.270246	0.274187	-1.5912
-0.01557	0.135726	0.074553	-1.09901	-1.64993	0.399419	0.481365	0.395154
-0.16432	-0.0022	-0.34331	-1.76811	-2.53591	0.256534	0.304547	-0.35332
-0.27964	0.108767	0.121866	-0.655	-0.68832	0.290073	-0.02601	-0.4344
-0.04654	-0.14829	-0.17592	-1.2126	-1.71143	0.286754	0.330752	0.07799
-0.45075	-0.13186	-0.18669	-1.00386	-1.47109	0.061173	0.249231	-0.0542
-0.35073	0.229504	-0.2712	0.210282	0.791134	0.003631	-0.17251	0.414554
0.189224	-0.0646	0.5006	0.891954	0.489109	0.538522	0.442186	0.307421
-0.25904	-0.27484	-0.28909	-1.64359	-2.51188	0.332937	0.212532	-0.47669
-1.87214	-0.17248	0.021507	-1.17718	-0.8412	-1.78836	-2.36246	-1.47402
-0.08056	-0.45163	-0.09583	-1.14214	-1.78481	0.362509	0.533204	0.280941
-0.47681	-0.30407	0.084348	-2.99484	-3.3676	0.099148	-0.15846	-0.82077
-0.25195	-0.20293	-0.08167	-1.05434	-1.64934	0.187099	0.383801	0.049781
-0.0799	-0.08616	-0.335	-0.697	-1.17989	0.364996	0.196048	-0.08107
-0.43742	0.239641	-0.39386	-2.08481	-2.0969	0.11203	-0.00589	-0.087
-0.4216	-0.27596	-0.07369	-3.52648	-3.59696	0.053724	-0.12903	-1.17416
-0.73958	-1.12683	-0.28932	-0.50306	-1.08937	-1.34463	-0.74365	-1.12019
-0.61121	-0.0117	-0.48865	-3.19071	-3.45815	-0.02779	-0.21898	-0.656
-0.30465	0.124982	-0.04487	-1.6211	-2.2253	0.45412	0.143244	-0.24555
0.051203	0.159868	0.244669	-0.5619	-1.54601	0.470875	0.766188	0.063523
-0.526	-0.22538	-0.25409	-2.15377	-2.92743	0.192029	-0.08103	-0.55412
-0.19656	-0.51064	-0.31878	-3.71891	-3.46235	0.165379	-0.23472	-2.21786
-0.19179	0.216649	-0.19562	-1.94015	-1.7533	0.117499	-0.11495	-0.69233
-0.06793	0.161344	-0.13648	0.064331	0.425494	0.372169	-0.28653	0.748668
0.040424	0.002908	-0.14585	-1.2885	-1.87299	0.272814	0.595412	0.149319
-0.13534	-0.31658	-0.17158	-0.49767	-0.9408	-0.71096	-1.03054	-1.02157
-0.22888	-0.2047	0.052547	-0.76441	-1.09887	0.260308	0.17197	-0.71112
0.152466	0.253517	0.361262	0.084103	-0.31359	0.13834	-0.20935	0.132221
0.259812	-0.16007	-0.58474	-1.08043	-1.24353	0.261419	0.552093	-0.87654
-0.28361	0.325372	0.00904	-1.06953	-1.24106	0.362227	0.15086	0.306749
-0.31825	0.14585	0.115169	-0.49142	-0.64996	-0.16991	-0.61572	-0.34024
-0.15736	0.001658	-0.03623	-1.2291	-1.64767	0.469431	0.266894	0.148656
0.198314	-0.11296	0.099063	-0.50923	-1.512	0.558744	0.669393	0.362903
-0.44441	-0.16309	-0.45838	-2.72422	-3.16957	-0.06111	0.112451	-0.77211
-0.42651	-0.04148	-0.10226	-2.30977	-1.96839	0.031494	-0.20822	-0.94178
-0.54024	-0.48531	-0.04275	-2.97476	-3.81572	-0.03745	0.116438	-1.55515
-0.145	-0.04733	0.181804	-0.77259	-0.44631	0.16103	0.003614	-0.6376
-0.27239	0.202022	0.16661	-0.53974	-0.15701	-0.04416	-0.33074	-0.14104
-0.1623	0.155587	-0.11458	-1.19469	-1.45361	-0.12712	0.330293	-0.10691
0.033078	-0.02378	0.195848	-0.5042	-1.05048	0.388422	0.547032	0.266674
-0.09065	-0.24278	0.31252	-1.32648	-1.74649	0.306867	0.442638	0.246658
0.063591	0.162628	0.211061	0.481215	-0.25094	0.545356	0.566307	0.284842
2.11166	0.006768	1.94449	2.42386	2.22618	-0.24037	0.239359	0.716489
0.032502	-0.20179	-0.29317	-0.61535	-0.84823	-0.13349	0.013639	0.429948
-0.13121	0.335156	-0.06399	-0.64295	-0.92277	0.209647	-0.26391	-1.04031
-0.1367	-0.19205	0.251982	-1.3169	-2.07258	0.340008	0.502946	0.126394
-0.60712	-0.29484	-0.29043	-2.93502	-3.48864	-0.121	-0.29013	-1.6056
-0.13316	-0.21	-0.01244	-1.31121	-2.15064	0.20785	0.244141	-0.74214
-0.58288	-0.55874	-0.59405	-3.45335	-4.50576	-0.05774	-0.0324	-1.59996
-0.49661	-0.3043	-0.47017	-2.87677	-3.43034	-0.06113	0.106224	-1.07781
-0.25428	-0.2695	0.129253	-1.2696	-2.03171	0.250119	0.307845	0.058246
0.655345	0.880008	0.149998	0.573325	0.773545	0.43373	0.689932	-0.59783
0.181495	-0.12364	0.155312	0.009322	-0.11056	0.263334	0.431981	0.592649
-0.34717	-0.05156	-0.15169	-2.27935	-2.53969	0.048528	0.041806	-0.16898
-0.3805	-0.08163	-0.10148	-1.76696	-2.19389	0.246754	-0.0099	-0.84407
-0.08642	1.08183	0.098343	1.12797	2.14583	0.359115	0.322481	0.433492
-0.3194	-0.0374	0.039452	-1.19661	-1.59546	0.037342	-0.13663	-0.13393
-0.19552	-0.17065	-0.09191	-1.40821	-2.04883	0.208822	0.302796	0.190964
-0.06665	1.23965	-0.16826	0.229021	0.466656	0.189092	0.237705	0.352965
0.047831	-0.57951	0.236222	0.064379	-0.13228	-0.30445	-0.21747	-0.21642
0.061598	1.03862	0.262834	0.496851	1.08808	0.124355	0.160362	0.49447
0.016205	1.12309	0.579776	1.15118	1.69111	0.418178	0.374652	1.26672
-0.29458	0.827458	0.160445	-0.22557	0.224007	0.17753	0.026788	-0.1057
-0.60898	0.254076	0.188774	-0.50378	-0.70937	0.319095	0.122219	0.257292
-0.14721	0.841122	-0.00848	0.755989	0.877008	0.098543	-0.05505	0.439815
-0.14718	1.16559	-0.21703	-0.35597	0.10254	0.097066	0.250698	0.075757
-0.30571	0.003074	0.319508	-0.61042	-0.84299	0.408166	0.179557	-0.38139
0.111795	0.816909	0.043142	-0.84461	-1.02018	0.241414	0.563427	0.700162
-0.68116	-0.32339	-0.52725	-3.25067	-3.94177	-0.09765	-0.43672	-0.45612
-0.15692	0.994087	0.148511	-0.79164	-0.72755	0.181696	0.154896	-0.34509
-0.50375	-0.09893	-0.44796	-3.33789	-3.95824	-0.19106	-0.17373	-1.64806
-0.36479	-0.09342	-0.18771	-1.66164	-1.87637	0.047838	0.033021	-0.03282
-0.00689	-0.77111	-0.16561	-0.79185	-1.26075	0.392102	0.364823	0.023593
0.165338	-0.07582	0.543955	0.109549	0.392668	0.387969	0.675711	0.381995
-0.15109	0.043673	-0.51166	-1.56947	-1.76878	0.263443	0.10577	0.101668
-0.1973	-0.22217	-0.05861	-0.98192	-1.18116	0.082364	0.160536	-0.09976
-0.14793	-0.19177	0.197042	-1.00828	-1.61304	0.42226	0.488561	0.328657
0.279352	0.001966	0.603565	-0.63108	-1.79254	1.28288	1.06032	0.801117
-0.01541	-0.09951	-0.11535	-0.42327	-0.37482	0.188521	0.175446	0.803542
0.095517	0.108029	0.123543	0.169278	0.141612	0.336126	0.138476	1.10848
0.112622	0.161836	-0.35039	-0.88258	-0.14033	-0.30873	-0.19981	-0.06561
-0.01515	-0.04678	0.047013	-1.60021	-2.2021	0.431349	0.618101	0.413969
0.833181	0.208341	0.979394	1.74099	1.79138	0.512732	0.410426	1.12455
0.095055	-0.1934	0.303577	0.741886	0.363029	0.759327	0.550444	0.154668
-0.45032	-0.15986	-0.05092	-1.56154	-2.05959	0.270097	-0.22452	-0.65604
-0.48141	-0.09541	0.028995	-1.67375	-1.89021	0.094684	-0.11804	-0.30363
-0.12867	-0.27495	-0.12624	-1.25863	-2.06946	0.500956	0.512389	-0.08056
1.92835	-0.07216	0.65633	-0.41257	0.083232	0.192009	0.041181	0.797591
-0.32467	0.199404	-0.04659	-0.89857	-1.70543	0.471644	0.457776	0.427891
-0.29131	-0.00741	-0.28466	-2.10405	-1.97119	0.511594	-0.07255	-0.62559
0.144074	0.196152	0.231397	0.565376	0.196819	0.479403	0.46446	0.055798
0.268823	-0.05334	-0.0776	-0.76435	-0.82255	0.049033	0.157424	0.762438
-0.24449	-0.10235	-0.49058	-1.03508	-0.71145	-0.03433	-0.45554	-0.16952
-0.35452	-0.21173	-0.00222	-0.57251	-0.67782	0.203982	-0.11524	-0.32921
-0.70669	-0.56223	-0.66025	-3.54456	-4.26517	-0.082	-0.30653	-1.15748
0.029681	0.189565	0.165915	-0.21654	-0.21846	0.228997	-0.04218	0.096159
-0.16459	-0.20281	-0.03776	-1.20276	-1.55115	0.331947	0.223079	-0.6185
0.252496	0.164621	0.239563	0.29806	0.045327	0.319889	0.528562	0.000181
-0.56717	-0.15796	0.113305	-1.16088	-1.76015	0.205972	0.034622	-0.30636
-0.18529	-0.18964	-0.04983	-1.29121	-1.60555	0.101021	0.202191	-0.20974
-0.0027	0.011241	-0.18293	-1.12173	-1.5985	0.476758	0.531075	-0.11424
-0.56775	-0.37598	-0.53346	-2.76683	-3.28039	-0.02803	-0.28252	-1.31974
-0.73059	-0.4901	-0.4564	-3.57768	-3.96269	-0.20175	-0.48434	-0.84224
-0.42758	-0.07456	0.148942	-0.56138	-0.51603	-0.3249	-0.48337	-0.23735
-0.35424	0.239164	0.107304	-1.10699	-1.56378	0.111116	0.060722	0.315169
0.056828	0.005118	0.629658	0.167235	-0.02487	0.365589	0.591237	0.41427
-0.1815	-0.22429	-0.17951	-0.64706	-0.8433	0.19696	-0.03331	-0.77489
-0.43922	-0.28242	-0.26537	-2.83799	-3.3016	-0.06721	0.069729	-1.57465
-0.5535	-0.12258	-0.12581	-3.42343	-3.74763	0.013498	0.053156	-0.61089
0.212457	-0.18824	0.077822	0.251906	-0.3192	0.247631	0.294156	-0.09509
0.013556	-0.41145	-0.23122	-2.13722	-3.01032	0.266276	0.626684	0.191271
-0.55093	-0.32703	0.166524	-1.63217	-2.09729	-0.00984	-0.21632	-0.74086
-0.52679	-0.07859	-0.49701	-0.84629	-0.63208	-0.23021	-0.73506	-0.416
-0.05417	-0.2676	-0.36013	-0.63229	-0.88971	0.031372	-0.12206	-0.42397
0.775646	0.319827	0.998345	1.20822	1.27529	1.07745	1.36365	0.993428
-0.04182	-0.02219	-0.13508	-1.54944	-2.03327	0.578451	0.537553	0.067081
-0.02565	0.145955	0.122865	-0.66939	-0.98426	0.338172	0.563621	0.179323
-0.28108	-0.29421	-0.87806	-3.04105	-3.59596	0.033079	0.263613	-1.0474
-0.00496	-0.03254	0.169977	-0.52979	-0.75943	0.406281	0.217625	-1.01331
0.134055	0.149976	0.138749	-0.32745	-1.19664	0.527859	0.685857	0.670397
-1.08517	-0.75312	-2.19566	-2.54261	-3.09266	-1.1928	-1.65223	-1.25583
