# Supplementary material for: Specialization of the chromatin remodeler RSC to mobilize partially-unwrapped nucleosomes
Source: eLife journal article supplement (doi:10.7554/elife.58130), 2020-06-04
Supplement: supp [file elife-58130-supp-v1.zip › elife_poa_e58130_Figure_5_source_data_2.xlsx]

## Sheet: Promoter occupancy
Chromosome	Start0	End	Name	GeneName	Strand	Length	Rsc1	Rsc2	Rsc3	Hmo1
chrXVI	731855	732251	YPR102C	RPL11A	-	396	3.62273	2.91619	2.99048	0.720797
chrXVI	572361	572638	YPR008W	HAA1	+	277	2.39454	1.27888	1.7084	0.682223
chrXVI	566851	567140	YPR005C	HAL1	-	289	1.76101	1.32898	1.45146	2.37567
chrXVI	551749	551942	YPL004C	LSP1	-	193	1.8998	1.34899	1.6597	1.39473
chrXVI	520269	520583	YPL017C	IRC15	-	314	3.70767	2.80366	3.11358	-0.596198
chrXVI	481982	482189	YPL037C	EGD1	-	207	2.97395	2.46615	2.6025	-0.0356715
chrXV	901248	901641	YOR312C	RPL20B	-	393	2.28844	1.47252	1.90659	5.77251
chrXV	877794	878024	YOR298C-A	MBF1	-	230	2.43111	1.84853	1.81835	-0.161203
chrXV	832140	832369	snR8	SNR8	+	229	2.2654	1.41921	1.86818	0.695265
chrXV	779461	780057	YOR234C	RPL33B	-	596	2.79299	1.92724	2.10564	5.5474
chrXV	770525	770723	YOR230W	WTM1	+	198	0.465881	0.873839	0.965472	1.19474
chrXV	722678	722879	YOR204W	DED1	+	201	0.748436	0.388527	0.783951	-0.17222
chrXV	682202	682416	YOR186W	0	+	214	1.80375	1.24889	1.56437	0.684647
chrXV	480409	480613	YOR084W	LPX1	+	204	0.540438	0.176867	0.253145	0.00774951
chrXV	443610	444074	YOR062C	0	-	464	2.55558	1.67184	1.8844	0.857461
chrXV	377876	378137	YOR023C	AHC1	-	261	2.31176	1.77573	1.68203	0.453524
chrXV	347363	347640	YOR010C	TIR2	-	277	2.18648	1.51915	1.85503	1.12716
chrXV	253657	254218	YOL039W	RPP2A	+	561	2.69647	1.98434	2.20628	4.03375
chrXV	216216	216597	YOL060C	MAM3	-	381	3.00082	2.10268	2.14959	-0.350191
chrXV	58507	58779	YOL140W	ARG8	+	272	2.1086	1.64139	1.80025	0.0254382
chrXIV	479225	479532	YNL079C	TPM1	-	307	2.54294	2.04258	1.91686	0.300689
chrXIV	440865	441291	YNL097C-B	0	-	426	2.27668	1.68483	1.79353	4.2513
chrXIV	266660	266831	YNL199C	GCR2	-	171	1.36485	0.950401	1.05947	0.450423
chrXIV	63007	63395	YNL302C	RPS19B	-	388	2.95485	2.10824	2.33887	6.27814
chrXIII	912282	912444	YMR318C	ADH6	-	162	1.63653	0.930116	1.56901	0.366457
chrXIII	861028	861437	YMR296C	LCB1	-	409	3.23268	2.58613	2.534	1.29285
chrXIII	754261	754684	YMR242C	RPL20A	-	423	3.10573	2.22156	2.40861	5.28906
chrXIII	652023	652301	snR11	SNR11	+	278	1.69486	1.40504	1.48292	1.60371
chrXIII	605763	606021	YMR172W	HOT1	+	258	3.78665	2.83784	3.20993	0.738414
chrXIII	551261	551853	YMR143W	RPS16A	+	592	3.22745	2.20733	2.33722	5.05142
chrXIII	407576	407748	YMR069W	NAT4	+	172	3.39819	2.32778	2.976	-0.14199
chrXIII	26476	26846	YML121W	GTR1	+	370	1.44525	1.21372	1.41025	0.787793
chrXII	1012062	1012405	YLR437C	DIF1	-	343	4.08667	2.47908	2.99948	1.26897
chrXII	921537	921897	YLR399C	BDF1	-	360	3.08467	2.14941	2.24429	0.702733
chrXII	897787	898083	YLR388W	RPS29A	+	296	3.12255	2.30906	2.43065	2.26419
chrXII	645782	646149	YLR256W	HAP1	+	367	3.01775	2.07255	2.35319	1.52944
chrXII	514824	515085	YLR179C	0	-	261	3.30587	2.23694	2.4434	0.960949
chrXII	404182	404501	YLR130C	ZRT2	-	319	1.65084	1.06947	1.14658	0.512023
chrXII	264018	264189	YLR063W	BMT6	+	171	0.788293	0.603	0.681309	1.07259
chrXII	48669	48979	YLL045C	RPL8B	-	310	2.13405	1.95968	2.3568	1.45254
chrXI	618803	619038	YKR094C	RPL40B	-	235	3.34096	2.53946	2.81849	1.75375
chrXI	431355	431836	YKL006W	RPL14A	+	481	2.40201	1.81636	2.02109	5.60014
chrXI	335005	335278	YKL056C	TMA19	-	273	0.900605	1.41489	1.37486	0.455524
chrXI	226208	226417	YKL112W	ABF1	+	209	1.99375	1.47718	1.37753	0.501472
chrXI	127084	127340	YKL171W	NNK1	+	256	2.64492	1.87867	2.02165	-0.953431
chrX	662871	663383	YJR127C	RSF2	-	512	2.7235	2.00324	2.14081	1.08343
chrX	607928	608246	YJR094W-A	RPL43B	+	318	2.83672	1.87596	2.22908	0.750758
chrX	268466	268820	YJL088W	ARG3	+	354	3.41602	2.3759	2.66037	0.617221
chrX	154769	154951	YJL138C	TIF2	-	182	1.56107	1.0442	0.940369	0.263215
chrX	150563	150837	YJL141C	YAK1	-	274	2.16285	1.49244	1.43517	-0.0883672
chrX	139634	139828	snR128	SNR128	-	194	0.975529	0.395319	0.672431	0.963056
chrVIII	505607	506052	YHR203C	RPS4B	-	445	2.47206	1.74003	1.9696	5.09255
chrVIII	209334	209517	YHR050W-A	0	+	183	2.83374	2.10303	2.33994	0.295131
chrVIII	98118	98373	YHL007C	STE20	-	255	3.23283	2.10624	2.36968	0.185861
chrVIII	32730	32939	YHL035C	VMR1	-	209	0.702188	0.532895	0.668894	-1.03697
chrVII	904951	905208	YGR203W	YCH1	+	257	1.78935	1.84799	1.81545	2.12157
chrVII	883811	883981	YGR192C	TDH3	-	170	-0.393666	0.645243	-0.0585206	0.733609
chrVII	366044	366381	YGL076C	RPL7A	-	337	1.9963	1.17368	1.29577	1.62347
chrVII	180474	180637	YGL173C	XRN1	-	163	1.21256	0.683686	0.862349	-0.110623
chrVI	223833	224197	YFR032C-B	0	-	364	2.79387	1.92315	1.99453	2.32094
chrVI	221437	221817	RUF23	RUF23	+	380	2.06477	1.27568	1.32436	5.77751
chrV	492110	492329	YER159C	BUR6	-	219	2.41526	1.66186	1.82688	0.606389
chrV	431120	431453	snR52	SNR52	-	333	2.64864	1.67817	2.01278	0.474367
chrV	396295	396714	YER117W	RPL23B	+	419	2.5643	1.86	2.20538	5.57202
chrV	295056	295397	YER069W	ARG5,6	+	341	2.31832	1.66478	1.56384	1.09995
chrV	191905	192332	YER017C	AFG3	-	427	2.4528	2.13264	2.01651	1.01368
chrV	141038	141546	YEL007W	MIT1	+	508	2.37244	1.19591	1.49177	1.66402
chrV	140330	140750	YEL009C	GCN4	-	420	2.25475	1.66365	1.70111	1.26855
chrV	85037	85605	YEL034W	HYP2	+	568	2.8133	1.88293	1.82278	1.11238
chrV	53264	53532	YEL054C	RPL12A	-	268	2.15609	1.36871	1.55462	6.04575
chrIX	384197	384557	YIR017C	MET28	-	360	2.3729	1.56918	1.83446	1.05897
chrIX	254155	254721	YIL055C	0	-	566	3.02091	2.18223	2.22664	1.11757
chrIV	1490826	1491030	YDR527W	RBA50	+	204	1.53285	1.12432	0.927584	0.0261608
chrIV	1489060	1489317	YDR524C	AGE1	-	257	1.49929	1.61133	1.33274	3.82436
chrIV	1267206	1267390	YDR398W	UTP5	+	184	1.51667	1.23017	1.35781	-0.151624
chrIV	1013695	1014084	YDR276C	PMP3	-	389	3.00246	2.14575	2.4693	1.29187
chrIV	1011446	1011941	YDR275W	BSC2	+	495	2.80175	2.21107	2.25153	1.62275
chrIV	589498	589705	YDR071C	PAA1	-	207	1.89613	1.37418	1.53791	-0.382833
chrIV	491043	491449	YDR025W	RPS11A	+	406	2.48743	1.87108	2.02375	5.19768
chrIV	330848	331018	YDL070W	BDF2	+	170	2.22247	1.54674	1.87948	-0.289871
chrIV	221828	222238	YDL133C-A	RPL41B	-	410	2.4137	1.7457	1.87553	2.64054
chrIII	262678	262941	YCR084C	TUP1	-	263	3.53664	2.7758	2.94825	-0.31432
chrIII	90791	91148	YCL018W	LEU2	+	357	2.3994	1.38598	1.62016	0.0128255
chrIII	50300	50746	YCL042W	0	+	446	2.99286	2.21392	2.29232	0.0967747
chrII	613970	614411	YBR196C-A	0	-	441	1.53727	1.3728	1.2872	0.77464
chrII	595573	595947	YBR183W	YPC1	+	374	2.51384	1.89526	2.1753	1.90187
chrII	477164	477622	YBR118W	TEF2	+	458	2.31818	1.75235	1.65437	1.68815
chrII	336900	337171	YBR049C	REB1	-	271	2.6221	1.93026	2.1224	0.824875
chrII	332470	332780	YBR048W	RPS11B	+	310	3.31682	2.32796	2.74727	4.7742
chrII	297829	297998	YBR029C	CDS1	-	169	1.37586	1.24277	1.05288	-0.731275
chrII	135742	136031	YBL044W	0	+	289	3.21313	2.37176	2.62268	1.04377
chrII	89500	89914	YBL071C-B	0	-	414	2.51675	1.68834	1.94602	4.91681
chrI	192385	192559	YAR035C-A	0	-	174	1.54094	0.467345	1.29362	-0.287299
chrI	141644	142122	YAL005C	SSA1	-	478	2.34647	1.28558	1.61959	0.19485
chrXVI	309661	309815	YPL127C	HHO1	-	154	1.8548	1.2732	1.62874	-0.536651
chrVI	22906	23056	YFL054C	0	-	150	1.29368	0.412469	0.866221	-0.519232
chrXVI	203004	203210	YPL181W	CTI6	+	206	1.74751	1.07969	1.39731	0.714147
chrXVI	173703	173855	snR59	SNR59	+	152	0.218172	0.185607	0.478119	1.27356
chrXIII	252892	253128	YML008C	ERG6	-	236	0.126449	0.653936	0.625518	-0.301096
chrVIII	127485	127704	YHR011W	DIA4	+	219	0.150258	0.217057	0.0753219	1.53103
chrV	545094	545598	YER177W	BMH1	+	504	2.72318	1.78584	2.1048	1.43579
chrXV	656935	657140	YOR173W	DCS2	+	205	0.759388	0.582849	0.622815	-0.291583
chrII	392360	392734	YBR077C	SLM4	-	374	2.95464	2.08854	2.258	1.3749
chrXVI	529420	529575	YPL013C	MRPS16	-	155	1.27476	0.817955	1.13976	1.26783
chrXIII	886477	886936	YMR307W	GAS1	+	459	1.80186	1.21561	1.37205	0.789589
chrII	267398	267583	YBR014C	GRX7	-	185	1.14416	0.86328	0.924489	-0.28508
chrXVI	381427	381593	YPL088W	0	+	166	1.81131	1.32053	1.51858	1.01808
chrVII	951216	951537	YGR229C	SMI1	-	321	2.41139	1.52107	1.80684	0.888052
chrVI	95575	95800	YFL021W	GAT1	+	225	3.53731	2.71776	2.95223	1.04404
chrXII	730507	730763	YLR301W	HRI1	+	256	2.27843	1.53512	1.61693	0.526809
chrXII	722446	722602	YLR295C	ATP14	-	156	1.68354	1.24894	1.22002	0.209631
chrX	636842	636987	YJR112W	NNF1	+	145	1.38859	1.18307	1.46534	0.241922
chrIV	427004	427194	YDL015C	TSC13	-	190	-0.990234	1.17233	0.656068	1.7137
chrIII	223302	223466	YCR057C	PWP2	-	164	1.21281	0.886396	1.28369	-1.3703
chrXVI	105515	105676	YPL233W	NSL1	+	161	1.87105	1.39576	1.67784	0.57215
chrXII	241718	242163	YLR048W	RPS0B	+	445	2.22019	1.51531	1.78733	6.59515
chrXI	304113	304298	YKL071W	0	+	185	0.119382	0.0555238	0.354252	0.0104638
chrX	665078	665222	YJR129C	EFM3	-	144	0.689512	0.401687	0.535799	-0.396772
chrVII	546197	546341	YGR030C	POP6	-	144	1.39313	0.771367	1.11773	0.0839792
chrV	472531	472675	YER151C	UBP3	-	144	1.23281	0.469599	1.14446	0.441083
chrXVI	939025	939188	YPR199C	ARR1	-	163	0.883348	1.38729	1.20221	-0.532656
chrXII	789823	790257	YLR332W	MID2	+	434	2.58991	1.66467	1.70018	1.30393
chrX	157325	157651	YJL136C	RPS21B	-	326	2.58108	1.53905	1.6884	5.41881
chrVIII	292928	293145	YHR094C	HXT1	-	217	2.23947	1.39284	1.38785	0.607326
chrVII	534849	535100	YGR027C	RPS25A	-	251	3.30787	2.54281	2.69019	1.43993
chrVII	485247	485440	YGL006W-A	0	+	193	2.232	1.51034	1.91041	0.384659
chrIV	211146	211345	YDL140C	RPO21	-	199	1.84563	1.346	1.34049	-0.268523
chrII	718201	718351	YBR250W	SPO23	+	150	1.60279	1.46889	1.33084	0.160446
chrII	606038	606215	YBR191W	RPL21A	+	177	2.08792	1.29416	1.57624	6.32402
chrII	407255	407536	YBR082C	UBC4	-	281	2.62945	2.24828	2.37842	0.972985
chrXIV	661988	662153	YNR016C	ACC1	-	165	2.90543	2.05854	2.47539	2.05046
chrXII	22749	22897	YLL060C	GTT2	-	148	1.78825	1.04358	1.43414	-0.323269
chrXI	578898	579147	YKR074W	AIM29	+	249	3.29658	1.73232	2.35417	-0.208659
chrX	663530	663765	snR3	SNR3	+	235	1.79583	1.16071	1.3858	0.668402
chrX	134038	134184	YJL154C	VPS35	-	146	1.10269	1.43606	1.44651	0.0780192
chrIV	1105915	1106065	YDR319C	YFT2	-	150	-0.0995333	0.777613	0.715413	1.26717
chrII	564908	565198	YBR162W-A	YSY6	+	290	2.73371	2.06556	2.12232	-0.0897903
chrXV	426140	426465	YOR051C	ETT1	-	325	1.95005	1.44718	1.70176	1.49469
chrXII	80286	80444	YLL031C	GPI13	-	158	1.64447	0.857232	1.23939	0.182492
chrXI	34164	34312	YKL212W	SAC1	+	148	0.995797	0.538984	0.88843	-1.41197
chrX	651307	651870	YJR123W	RPS5	+	563	2.43871	1.71716	1.86393	5.15093
chrVII	346994	347135	YGL086W	MAD1	+	141	1.21523	0.706223	0.99564	1.18671
chrIV	1420929	1421087	YDR482C	CWC21	-	158	1.57471	1.23407	1.3999	1.05142
chrIV	769037	769214	YDR155C	CPR1	-	177	1.93069	1.15291	1.35418	1.9904
chrIV	591521	592028	YDR072C	IPT1	-	507	3.25389	2.37464	2.62657	1.81107
chrIII	279892	280061	YCR093W	CDC39	+	169	1.74809	1.32482	1.4029	-0.570008
chrXVI	883045	883190	YPR170W-B	0	+	145	1.49336	1.35114	1.39497	-0.442983
chrXIII	472751	472974	YMR102C	0	-	223	2.83284	2.2127	2.45522	3.54724
chrXI	153030	153214	YKL160W	ELF1	+	184	-1.64353	1.30561	1.14577	-0.308703
chrX	85446	85586	YJL181W	0	+	140	1.53049	0.853196	1.41157	-0.0703957
chrVIII	377798	377938	YHR138C	0	-	140	1.50423	1.42205	1.49615	0.225656
chrXVI	96268	96407	YPL241C	CIN2	-	139	1.3261	0.970927	0.919091	1.06311
chrXV	908842	909276	YOR317W	FAA1	+	434	2.35982	1.90076	1.89398	0.543812
chrXIV	241391	241600	YNL216W	RAP1	+	209	2.3789	1.83015	1.95259	-0.375036
chrXIV	154850	154989	YNL261W	ORC5	+	139	-0.736912	0.367248	0.411823	-0.841699
chrXII	675507	675646	YLR265C	NEJ1	-	139	0.588122	0.662601	0.511653	0.113912
chrXI	445139	445279	YKR003W	OSH6	+	140	2.13276	1.50069	1.84151	-0.20923
chrX	718018	718180	YJR152W	DAL5	+	162	0.808343	1.03061	1.03166	0.0241938
chrV	337667	337852	YER089C	PTC2	-	185	1.17476	0.847866	0.898128	1.25118
chrII	452156	452595	YBR106W	PHO88	+	439	3.80603	2.94213	3.24276	0.195435
chrII	291998	292191	YBR025C	OLA1	-	193	2.12396	1.42162	1.65518	0.00287461
chrXV	479245	479448	YOR083W	WHI5	+	203	2.75772	1.80865	2.55645	0.502008
chrXIII	625623	625785	YMR182W-A	0	+	162	1.40554	0.483672	1.3056	-0.307802
chrXI	554713	554871	YKR059W	TIF1	+	158	2.15644	1.82615	1.93371	0.611342
chrXI	325618	325764	YKL061W	BLI1	+	146	1.15396	0.647505	0.7011	-0.199977
chrVIII	452726	452884	YHR175W	CTR2	+	158	1.19507	0.727468	0.7085	0.331066
chrVII	428064	428539	YGL036W	0	+	475	2.96873	2.14283	2.41311	0.0886034
chrVI	146957	147103	YFL002C	SPB4	-	146	0.638118	0.321173	0.330694	-0.603345
chrIV	617254	617432	YDR086C	SSS1	-	178	1.99871	1.19158	1.46984	0.934291
chrIII	246660	246918	YCR073C	SSK22	-	258	2.96024	2.26555	2.06056	-0.79377
chrXVI	828191	828329	YPR148C	0	-	138	0.980273	0.644791	0.725433	-0.135903
chrXIV	635757	635894	YNR004W	SWM2	+	137	-0.189922	0.232078	0.270743	-0.478118
chrXIV	350707	350845	YNL147W	LSM7	+	138	1.82032	1.3103	1.64486	0.931056
chrXII	673932	674208	YLR264C-A	0	-	276	2.67946	2.17603	2.24847	0.496367
chrX	703110	703546	YJR145C	RPS4A	-	436	2.62323	1.68796	1.98272	5.63872
chrX	623336	623514	YJR104C	SOD1	-	178	2.48241	2.17739	2.01182	1.51424
chrX	572983	573120	YJR074W	MOG1	+	137	0.694055	0.8653	0.807077	-1.04857
chrVII	123358	123549	YGL200C	EMP24	-	191	2.06632	1.62017	1.89721	-0.748698
chrIV	1401328	1401713	YDR471W	RPL27B	+	385	2.6993	2.08857	2.35711	5.80874
chrXV	92907	93198	YOL121C	RPS19A	-	291	3.27402	2.05157	2.42154	0.894491
chrXIII	810862	811099	YMR272W-B	0	+	237	3.16647	1.99382	2.55436	0.687051
chrXIII	159022	159340	YML058W	SML1	+	318	3.22548	2.18862	2.45106	0.511558
chrXII	672849	673082	YLR264W	RPS28B	+	233	2.15411	1.6149	1.52317	0.265247
chrVIII	234708	234844	YHR069C	RRP4	-	136	0.797216	0.622631	0.815591	-0.894006
chrVIII	38603	38739	YHL032C	GUT1	-	136	0.955117	0.450321	0.859313	0.631179
chrVII	767294	767439	YGR140W	CBF2	+	145	1.62621	0.795059	1.20147	0.177732
chrVI	36635	36772	YFL049W	SWP82	+	137	1.24556	0.740592	1.02286	-0.115635
chrIV	1135496	1135741	YDR334W	SWR1	+	245	1.88042	1.09633	1.42629	0.57662
chrXIV	254165	254340	YNL208W	0	+	175	1.6084	1.08899	1.00973	0.270754
chrXIII	411340	411519	YMR071C	TVP18	-	179	1.73033	1.28011	1.29888	1.68409
chrXII	743927	744073	YLR306W	UBC12	+	146	1.37022	0.67649	1.02195	0.751729
chrXII	691352	691487	YLR273C	PIG1	-	135	1.3342	0.684474	1.10634	0.544116
chrX	294970	295151	YJL076W	NET1	+	181	1.66564	1.33383	1.49286	0.876966
chrV	84706	84890	YEL036C	ANP1	-	184	1.57347	0.907053	1.01735	1.33691
chrIV	310203	310411	YDL081C	RPP1A	-	208	1.3465	1.31176	1.21875	1.7197
chrXVI	565097	565239	YPR004C	AIM45	-	142	0.924668	0.582503	0.799387	-0.16669
chrXIII	223892	224299	YML026C	RPS18B	-	407	2.17969	1.53136	1.75203	5.4168
chrV	123039	123202	YEL017W	GTT3	+	163	0.623789	0.889954	1.06496	2.71096
chrIX	154932	155157	YIL111W	COX5B	+	225	0.923026	0.903743	1.04535	0.154849
chrIV	1355592	1355973	YDR447C	RPS17B	-	381	2.91504	2.1051	2.33199	2.46455
chrIII	137568	137765	YCR012W	PGK1	+	197	-0.341871	0.726363	0.26819	0.930751
chrII	256198	256340	YBR010W	HHT1	+	142	1.37431	1.20122	1.34766	0.50838
chrXV	898402	898579	YOR310C	NOP58	-	177	1.14131	0.74358	0.704319	0.120153
chrXIII	892390	892528	YMR308C	PSE1	-	138	0.0446754	0.297088	0.514065	-0.744399
chrXIII	623250	623383	YMR180C	CTL1	-	133	-1.15697	0.46406	0.509469	-1.22837
chrXIII	388663	388836	YMR058W	FET3	+	173	0.764527	0.519594	0.485502	1.27159
chrXIII	16856	17000	YML127W	RSC9	+	144	1.29213	0.701653	1.19638	0.513165
chrXII	809377	809711	YLR342W	FKS1	+	334	1.99538	0.843617	1.36255	1.19163
chrXII	522182	522607	YLR185W	RPL37A	+	425	2.50483	1.73154	1.91952	6.15881
chrXII	332182	332352	YLR096W	KIN2	+	170	1.93196	1.40605	1.49186	-0.967971
chrXII	278668	278820	YLR071C	RGR1	-	152	1.54642	1.09722	1.15799	-0.493021
chrXI	340579	340815	YKL052C	ASK1	-	236	2.58785	2.0346	2.23539	0.538114
chrXI	309922	310079	YKL068W	NUP100	+	157	1.69579	1.03083	1.38352	1.10587
chrXI	93771	93976	YKL186C	MTR2	-	205	2.7136	1.91885	1.99198	1.09219
chrX	335681	335814	YJL053W	PEP8	+	133	0.0208729	0.662556	0.345974	-0.324055
chrVIII	102042	102181	YHL003C	LAG1	-	139	1.6862	1.23212	1.3973	0.521017
chrVIII	11031	11165	YHL047C	ARN2	-	134	1.25023	0.389113	1.09116	1.78592
chrVII	1025920	1026092	YGR267C	FOL2	-	172	1.44331	1.04525	1.22613	0.74919
chrVII	640451	640727	YGR079W	0	+	276	3.1953	2.28052	2.6377	-0.056642
chrVII	528940	529076	YGR023W	MTL1	+	136	1.15217	0.787706	1.09558	1.00738
chrV	246694	246832	YER047C	SAP1	-	138	1.8408	0.962425	1.47147	0.233349
chrV	80202	80401	YEL038W	UTR4	+	199	1.9348	1.24164	1.5408	0.331447
chrIX	422907	423044	YIR037W	HYR1	+	137	1.09319	0.588066	0.950773	-0.433649
chrIV	1398835	1398968	YDR468C	TLG1	-	133	0.872571	0.671632	0.962913	2.7562
chrXVI	464126	464276	YPL049C	DIG1	-	150	2.06171	1.32673	1.77121	1.57873
chrXV	860884	861016	YOR291W	YPK9	+	132	1.0876	1.00509	1.48829	2.21169
chrXV	186810	186985	YOL076W	MDM20	+	175	2.05989	1.30437	1.52891	-0.954949
chrXIV	442486	442618	YNL097C	PHO23	-	132	1.31406	0.789259	1.10967	-0.149379
chrXIII	271570	271789	YMR001C-A	0	-	219	1.925	1.23116	1.24414	1.34675
chrXI	291194	291342	YKL077W	0	+	148	0.553324	0.53882	0.918368	1.06238
chrVIII	341557	341689	YHR116W	COX23	+	132	1.98409	1.57369	1.64644	-0.50153
chrIX	316291	316714	YIL018W	RPL2B	+	423	1.70483	1.55974	1.68954	5.6524
chrIV	831597	831774	YDR184C	ATC1	-	177	0.239038	0.870772	1.02067	0.574112
chrIV	130541	130850	YDL184C	RPL41A	-	309	3.27643	2.18475	2.66934	1.41379
chrII	478972	479269	YBR119W	MUD1	+	297	0.722611	0.0127455	0.137676	1.13933
chrXVI	462172	462326	YPL050C	MNN9	-	154	1.61219	1.20515	1.38839	0.390103
chrXVI	169440	169647	YPL202C	AFT2	-	207	2.42929	1.83025	2.17241	0.738783
chrXVI	85375	85518	YPL246C	RBD2	-	143	1.6535	1.14194	1.54106	-1.29352
chrXIV	258200	258376	YNL206C	RTT106	-	176	0.976831	0.628469	0.71351	-0.34679
chrXIII	628777	628976	YMR185W	RTP1	+	199	0.474062	0.398899	0.282677	0.486645
chrXIII	86807	87131	YML092C	PRE8	-	324	-0.083546	-0.378075	-0.58506	-0.455994
chrVIII	125995	126478	YHR010W	RPL27A	+	483	3.11158	2.22069	2.50704	4.91972
chrVII	361942	362079	YGL078C	DBP3	-	137	0.572569	0.410688	0.492618	1.62077
chrV	287233	287414	YER065C	ICL1	-	181	2.23851	1.2832	1.849	-0.510528
chrV	234705	234856	YER042W	MXR1	+	151	0.467932	0.452548	0.533497	-0.23657
chrV	213262	213393	YER030W	CHZ1	+	131	1.30901	0.962469	1.2177	-0.240718
chrIV	699563	699749	YDR124W	0	+	186	2.35491	1.68556	2.06235	0.810565
chrII	60843	61145	YBL087C	RPL23A	-	302	3.08029	2.01912	2.45055	0.96547
chrXV	721746	721894	YOR202W	HIS3	+	148	0.946896	0.634886	0.867897	-0.858008
chrXIV	444376	444716	YNL096C	RPS7B	-	340	3.32018	2.32082	2.53023	4.0211
chrXIII	751324	751566	YMR240C	CUS1	-	242	3.77691	3.08657	3.11419	-0.336461
chrXIII	558601	558854	YMR146C	TIF34	-	253	1.68691	1.18727	1.4702	0.223334
chrXII	902718	902851	YLR389C	STE23	-	133	1.94259	1.48804	1.6995	-0.263339
chrXII	179689	179974	YLR018C	POM34	-	285	0.431422	2.09776	0.972199	-0.744827
chrX	700702	700832	YJR144W	MGM101	+	130	0.853786	1.31773	1.38407	-0.384165
chrX	639037	639274	YJR113C	RSM7	-	237	1.77725	1.58385	1.62295	0.801695
chrX	548454	548604	YJR060W	CBF1	+	150	1.73597	1.01782	1.37443	0.407887
chrIV	733966	734106	YDR139C	RUB1	-	140	0.847656	0.521514	0.754211	-0.44273
chrIV	455052	455205	YDR004W	RAD57	+	153	2.109	1.61748	1.8636	-0.0964399
chrXVI	899743	899881	YPR181C	SEC23	-	138	1.45084	1.04364	0.979994	-0.574817
chrXV	1006937	1007161	YOR356W	CIR2	+	224	0.783393	0.52489	0.801821	1.09522
chrXV	712617	712768	YOR194C	TOA1	-	151	1.03854	0.637764	0.912859	-1.51834
chrXV	654009	654151	YOR171C	LCB4	-	142	1.48919	0.956946	1.4013	0.948554
chrXV	21578	21781	YOL158C	ENB1	-	203	1.53973	1.45476	1.61097	0.487856
chrXIII	701230	701392	YMR216C	SKY1	-	162	0.901962	0.887625	0.733112	0.341251
chrXIII	589703	589832	YMR164C	MSS11	-	129	1.02053	0.878409	1.09648	0.286745
chrXIII	169849	170063	YML053C	0	-	214	1.95022	1.35712	1.46	1.89359
chrXIII	46564	46765	YML111W	BUL2	+	201	1.60129	1.14058	1.26432	0.590464
chrXII	232085	232214	YLR043C	TRX1	-	129	0.992033	0.363512	0.631446	0.700712
chrVIII	267336	267483	YHR081W	LRP1	+	147	1.39045	0.873039	0.976163	0.515854
chrVII	726513	726923	YGR118W	RPS23A	+	410	2.28692	1.41845	1.57773	5.5315
chrVII	527428	527579	YGR021W	0	+	151	1.91467	1.27724	1.51484	1.2659
chrIV	1434357	1434674	YDR490C	PKH1	-	317	3.38645	2.78648	2.81094	-0.0620659
chrIV	103432	103569	YDL199C	0	-	137	1.3325	0.83238	1.11357	0.985499
chrIII	206694	206830	YCR043C	0	-	136	1.06314	0.942563	0.944822	-1.16006
chrII	786897	787026	YBR293W	VBA2	+	129	1.36933	1.29313	1.14496	-0.622399
chrI	36390	36519	YAL059W	ECM1	+	129	0.8709	1.07041	1.141	0.110784
chrXV	552930	553096	YOR122C	PFY1	-	166	1.62919	1.03275	1.21711	0.507088
chrXV	361212	361340	YOR016C	ERP4	-	128	1.17403	0.883253	1.13176	-0.271833
chrXIV	495043	495487	YNL069C	RPL16B	-	444	2.48733	1.64615	1.89297	5.21532
chrXIV	351469	351597	YNL146W	0	+	128	0.957524	1.02123	1.0703	0.500784
chrXIV	104099	104241	YNL284C	MRPL10	-	142	1.59217	1.05548	1.17162	-0.218615
chrXIII	701539	701677	YMR217W	GUA1	+	138	0.937299	0.192505	0.623179	0.460907
chrXIII	271936	272116	YMR002W	MIX17	+	180	1.851	1.42659	1.49078	-0.38461
chrXII	589006	589290	YLR226W	BUR2	+	284	2.52021	2.77876	2.62151	0.483525
chrXII	576423	576650	YLR220W	CCC1	+	227	3.34012	2.41275	2.68124	0.385696
chrXI	611277	611418	YKR091W	SRL3	+	141	0.924681	0.795518	0.842889	2.61861
chrXI	518092	518221	YKR041W	0	+	129	1.55249	0.665929	0.795149	0.170818
chrXI	362303	362459	YKL039W	PTM1	+	156	1.25476	1.08149	1.06113	0.127463
chrX	572168	572296	YJR072C	NPA3	-	128	1.27228	1.01259	0.95048	-1.68389
chrVIII	173018	173219	YHR031C	RRM3	-	201	1.37083	1.32747	1.57815	-0.989614
chrVII	738271	738419	YGR123C	PPT1	-	148	1.82062	1.07096	1.51975	0.275901
chrVII	397734	398223	YGL056C	SDS23	-	489	2.98173	2.29035	2.49546	1.6077
chrIV	1328584	1328752	YDR432W	NPL3	+	168	0.848933	1.33097	1.03396	-1.0209
chrIII	104403	104555	YCL010C	SGF29	-	152	1.86703	1.49918	1.58138	-0.110581
chrII	483550	483678	YBR121C	GRS1	-	128	1.35914	0.889914	0.721663	0.28387
chrXVI	324316	324484	YPL119C-A	0	-	168	-0.185896	0.0112631	0.0895583	-1.4893
chrXVI	153188	153409	YPL212C	PUS1	-	221	0.232518	1.30869	0.51138	-0.0523692
chrXV	949248	949462	YOR335C	ALA1	-	214	2.442	1.43556	1.5699	-0.0356757
chrXV	315531	315738	YOL006C	TOP1	-	207	1.08043	1.55895	1.64234	0.349542
chrXII	296266	296405	YLR083C	EMP70	-	139	1.18801	0.768719	0.739333	0.661722
chrXII	154012	154165	YLR001C	0	-	153	1.21578	0.911054	1.02641	0.255482
chrVII	107617	107916	YGL206C	CHC1	-	299	1.74639	2.06968	1.82945	0.0356746
chrVI	148889	149049	YFR001W	LOC1	+	160	-0.731566	0.362194	0.0290987	-0.109079
chrVI	56063	56268	YFL037W	TUB2	+	205	2.66347	1.68317	1.72183	0.355801
chrII	642671	642830	YBR208C	DUR1,2	-	159	2.54072	1.43947	1.78239	0.871787
chrII	549128	549264	YBR154C	RPB5	-	136	1.85702	0.644746	1.24373	0.285951
chrII	92225	92352	YBL068W	PRS4	+	127	0.967576	0.40652	0.612972	-0.926757
chrXVI	876682	876818	YPR166C	MRP2	-	136	1.54503	1.3804	1.71961	0.283829
chrXVI	361666	361801	YPL100W	ATG21	+	135	0.900024	0.587284	0.851939	-0.0494407
chrXV	642212	642340	YOR162C	YRR1	-	128	1.18453	1.27918	1.17783	1.97667
chrXV	528694	528820	YOR110W	TFC7	+	126	1.12845	0.751329	1.14376	0.113127
chrXIV	779191	779350	YNR074C	AIF1	-	159	-0.411433	0.0606786	0.175973	-0.222789
chrXIV	535025	535151	YNL050C	0	-	126	-1.55097	0.252054	0.222166	1.21859
chrXIV	398369	398510	YNL122C	0	-	141	0.759016	0.861366	0.988883	-0.328347
chrXIII	477822	477979	YMR105C	PGM2	-	157	1.84439	1.22894	1.59721	1.73176
chrXIII	451429	451575	YMR091C	NPL6	-	146	0.815506	0.887175	1.07846	-1.00779
chrXII	777898	778031	YLR321C	SFH1	-	133	1.40374	0.857903	1.20491	0.294571
chrXII	273953	274079	YLR069C	MEF1	-	126	0.981375	0.662531	0.978935	-1.08444
chrXI	49851	49998	YKL206C	ADD66	-	147	1.23388	0.780391	0.951729	-1.32092
chrX	257064	257198	YJL092W	SRS2	+	134	1.00561	0.590354	0.61124	0.0631433
chrVIII	222698	222842	YHR061C	GIC1	-	144	2.06826	1.04643	1.49346	0.287275
chrVII	911686	911815	YGR208W	SER2	+	129	0.659974	0.732567	0.736322	-0.275384
chrV	192681	192818	YER018C	SPC25	-	137	1.45445	1.13371	1.44646	0.00656861
chrIX	232463	232906	YIL069C	RPS24B	-	443	1.89795	1.43087	1.55527	5.06186
chrIX	117711	117914	YIL126W	STH1	+	203	2.10381	1.357	1.56569	-0.609533
chrIV	1189735	1189982	YDR357C	CNL1	-	247	1.80736	2.11771	1.97731	0.576881
chrIV	232383	232570	YDL128W	VCX1	+	187	1.90718	1.40634	1.55616	0.620392
chrIV	217219	217530	YDL136W	RPL35B	+	311	3.2551	2.32225	2.25864	1.69356
chrIII	272904	273055	YCR090C	0	-	151	-1.44437	0.485037	0.435174	-0.546167
chrIII	103405	103565	YCL011C	GBP2	-	160	0.545631	0.244113	0.446469	-0.973403
chrIII	101853	101986	YCL012C	0	-	133	1.01533	0.766153	1.03221	1.4117
chrII	117232	117383	YBL054W	TOD6	+	151	1.58386	0.846027	1.22753	0.700828
chrXVI	653815	654102	YPR043W	RPL43A	+	287	3.10559	1.99142	2.47127	1.26808
chrXVI	647114	647246	YPR037C	ERV2	-	132	0.991488	0.483633	0.788476	-0.35527
chrXVI	404218	404466	YPL082C	MOT1	-	248	2.90639	2.08899	2.28859	1.81021
chrXV	511261	511610	YOR098C	NUP1	-	349	3.35829	2.65352	2.40398	0.254299
chrXV	137851	137976	YOL097C	WRS1	-	125	0.821664	0.569191	0.649491	-1.04916
chrXIV	720774	720912	YNR052C	POP2	-	138	1.26733	0.601717	0.733354	1.74445
chrXIII	77053	77214	YML099C	ARG81	-	161	1.30034	0.940577	1.23966	-0.481645
chrXII	954777	954907	YLR417W	VPS36	+	130	1.19446	0.786844	1.17908	-0.424903
chrXII	937294	937452	YLR409C	UTP21	-	158	0.459391	0.75823	0.465176	1.79316
chrXII	502195	502324	YLR172C	DPH5	-	129	0.704289	0.247587	0.599788	0.804229
chrXII	130854	131034	YLL010C	PSR1	-	180	2.83461	2.10502	2.1345	-0.634054
chrXII	125006	125143	YLL013C	PUF3	-	137	1.69702	1.51857	1.55122	0.300355
chrXI	358180	358306	YKL042W	SPC42	+	126	2.22401	1.38261	1.59417	0.807151
chrX	312760	312885	YJL069C	UTP18	-	125	1.70403	1.49701	1.68964	-0.621712
chrVII	729778	729932	YGR119C	NUP57	-	154	1.44063	0.812151	0.884979	-0.00797403
chrVII	693171	693296	YGR101W	PCP1	+	125	1.03563	0.617867	0.940778	-0.724772
chrVII	643835	643974	YGR081C	SLX9	-	139	2.11581	1.43602	1.7761	0.0623669
chrVII	383249	383408	YGL063W	PUS2	+	159	1.89671	1.50103	1.64955	0.295387
chrVII	334683	334808	YGL093W	SPC105	+	125	0.860988	0.72717	1.04275	0.44544
chrVI	249938	250077	YFR050C	PRE4	-	139	0.649945	0.993292	1.04966	-0.765419
chrIV	229563	229809	YDL130W	RPP1B	+	246	3.31332	2.19297	2.47364	1.72081
chrII	410799	410981	YBR084W	MIS1	+	182	1.98787	1.26103	1.56631	0.153967
chrI	114655	114780	YAL020C	ATS1	-	125	1.36651	0.802684	1.26802	-0.391868
chrXVI	746866	746990	YPR110C	RPC40	-	124	-1.40687	0.601237	0.175506	0.285381
chrXVI	378475	378641	YPL090C	RPS6A	-	166	1.9224	1.446	1.56076	6.22292
chrXIV	701711	701840	YNR041C	COQ2	-	129	1.09449	0.903742	0.939257	-0.968638
chrXIV	323622	323746	YNL165W	0	+	124	1.771	1.42691	1.71131	-0.217961
chrXIII	510407	510534	YMR121C	RPL15B	-	127	1.55867	1.23796	1.20794	1.64956
chrXIII	70158	70442	YML101C	CUE4	-	284	2.82413	1.90798	2.28231	1.84317
chrXII	721508	721724	YLR293C	GSP1	-	216	2.33742	1.70516	1.71198	0.0439389
chrXII	482135	482288	YLR157C-C	0	-	153	2.39008	1.67394	1.86169	1.57284
chrXI	402142	402288	YKL020C	SPT23	-	146	1.41835	1.02812	1.15276	-0.558741
chrX	54212	54336	YJL201W	ECM25	+	124	1.66171	1.26657	1.02078	0.58085
chrVIII	170542	170672	YHR030C	SLT2	-	130	1.6016	1.33115	1.70678	4.07
chrVIII	36064	36338	YHL033C	RPL8A	-	274	-0.369252	1.11684	1.00323	-0.442729
chrVII	76540	76802	YGL225W	VRG4	+	262	2.72245	1.78683	2.07295	-0.642344
chrVI	251851	251998	YFR051C	RET2	-	147	1.78982	1.1717	1.62889	-0.293703
chrVI	90664	90935	YFL024C	EPL1	-	271	3.88599	3.04265	3.19301	-0.44709
chrV	342423	342820	YER092W	IES5	+	397	2.71077	1.94634	2.03766	0.723012
chrV	210334	210458	YER027C	GAL83	-	124	1.14704	0.785552	1.21041	-0.640895
chrV	196732	196889	YER021W	RPN3	+	157	0.97751	1.14499	1.49516	0.458017
chrIX	353720	353844	YIL001W	0	+	124	-0.271315	0.933134	0.784061	1.52871
chrIX	99493	99900	YIL133C	RPL16A	-	407	2.58235	2.00939	2.12088	5.51197
chrIV	341278	341542	YDL061C	RPS29B	-	264	3.76196	2.70481	3.09174	1.07653
chrIII	313632	313888	YCR107W	AAD3	+	256	-0.3917	-0.872701	-0.891338	-0.000679688
chrIII	172539	172690	YCR028C	FEN2	-	151	0.962977	0.834152	0.911956	-0.0890417
chrII	170428	170552	YBL026W	LSM2	+	124	1.22441	0.729039	1.08957	0.681339
chrXVI	150320	150538	YPL214C	THI6	-	218	0.822692	1.89223	1.76632	-0.358068
chrXV	413650	413800	YOR045W	TOM6	+	150	1.67661	1.39903	1.28675	-0.528487
chrXV	83104	83496	YOL125W	TRM13	+	392	3.32917	2.60596	2.66094	1.37951
chrXIV	755035	755158	YNR066C	0	-	123	0.836606	0.931215	0.955233	1.12696
chrXIV	138301	138475	YNL268W	LYP1	+	174	1.93207	1.19145	1.39677	-0.41528
chrXIV	135672	135828	YNL271C	BNI1	-	156	1.97252	1.35429	1.6313	0.208378
chrXIII	650925	651112	YMR194W	RPL36A	+	187	2.18739	1.4966	1.74654	2.68783
chrXIII	145975	146425	YML064C	TEM1	-	450	2.58142	1.91624	2.19555	5.68692
chrXII	1028367	1028778	YLR448W	RPL6B	+	411	2.86259	2.1703	2.30039	5.86216
chrXII	963583	963706	YLR420W	URA4	+	123	1.66754	1.06756	1.25954	0.942108
chrXII	924510	924919	YLR403W	SFP1	+	409	2.81011	2.04663	2.14408	0.20917
chrXI	314542	314677	YKL067W	YNK1	+	135	1.7548	1.58822	1.86534	0.195439
chrXI	282664	282821	YKL081W	TEF4	+	157	1.63159	1.00694	1.22093	-0.321213
chrX	79466	79627	YJL187C	SWE1	-	161	2.60671	1.71631	2.00284	-0.287643
chrVIII	488290	488555	YHR193C	EGD2	-	265	1.434	3.18274	2.97194	-0.615251
chrVIII	375066	375197	YHR136C	SPL2	-	131	0.989521	0.561002	0.64083	1.79567
chrVIII	103971	104221	YHL001W	RPL14B	+	250	3.04383	2.0325	2.29817	0.958123
chrVII	757470	757593	YGR134W	CAF130	+	123	0.825504	0.575284	0.760473	-0.942125
chrVII	514371	514494	YGR013W	SNU71	+	123	0.436993	0.471254	0.591267	-0.200829
chrVII	496595	496718	YGL001C	ERG26	-	123	0.231846	0.481592	0.501175	2.5312
chrVII	494277	494415	YGL003C	CDH1	-	138	1.17531	0.896315	0.911594	-0.500416
chrIV	1019127	1019250	YDR279W	RNH202	+	123	1.15996	0.989443	1.01408	-0.0791089
chrIV	867900	868046	YDR208W	MSS4	+	146	2.70648	1.79888	2.19727	0.122214
chrIV	433338	433474	YDL008W	APC11	+	136	1.08328	0.677153	0.912057	-0.352684
chrIII	211652	211814	YCR047C	BUD23	-	162	1.97393	1.39746	1.95665	0.0685938
chrIII	173509	173632	YCR028C-A	RIM1	-	123	0.729696	0.855824	0.884139	0.432767
chrII	269628	269765	YBR015C	MNN2	-	137	1.06409	0.559769	1.04178	0.0330723
chrII	216439	216570	YBL007C	SLA1	-	131	1.2117	0.857334	0.759122	-0.674263
chrII	90509	90649	YBL069W	AST1	+	140	1.46117	0.96493	1.099	-0.48795
chrI	69612	69900	YAL039C	CYC3	-	288	2.43031	1.34622	1.90976	0.3615
chrXVI	729596	729727	YPR098C	0	-	131	1.06464	0.903351	0.747827	1.62226
chrXVI	675717	675842	YPR060C	ARO7	-	125	-0.0844016	1.10891	1.28705	0.0088848
chrXVI	305075	305223	YPL129W	TAF14	+	148	1.4533	0.811561	0.801997	-0.0464676
chrXVI	302756	303071	YPL131W	RPL5	+	315	2.83049	1.74118	2.16542	1.55191
chrXVI	188641	188995	YPL189C-A	COA2	-	354	3.299	2.23202	2.52953	-0.410976
chrXVI	82392	82517	YPL248C	GAL4	-	125	0.360581	0.1879	0.194738	-1.16476
chrXV	894285	894417	YOR307C	SLY41	-	132	0.836814	0.731404	0.800973	0.32499
chrXV	586408	586621	YOR138C	RUP1	-	213	3.23451	2.4372	3.07983	2.46206
chrXV	333393	333534	YOR004W	UTP23	+	141	1.47673	0.822614	1.18471	0.58735
chrXIV	269961	270134	YNL197C	WHI3	-	173	1.83054	1.19505	1.56234	0.173471
chrXIII	438922	439135	YMR086W	SEG1	+	213	2.42763	1.74957	1.9674	1.96075
chrXIII	253275	253649	YML007C-A	0	-	374	3.13507	2.33448	2.55541	-0.0293021
chrXII	764206	764335	YLR314C	CDC3	-	129	2.35971	1.64368	1.95485	-0.817172
chrXII	485787	485938	YLR159C-A	0	-	151	2.12329	1.48397	1.73404	1.52852
chrXII	472555	472706	YLR156C-A	0	-	151	2.81713	1.94555	2.27783	1.65523
chrX	576678	576826	YJR076C	CDC11	-	148	1.20884	0.492249	0.637081	-0.180064
chrX	211683	211855	YJL110C	GZF3	-	172	1.54068	1.0817	1.08283	3.60992
chrX	189480	189671	YJL123C	MTC1	-	191	1.94462	1.27252	1.64026	-0.62483
chrVIII	369864	369986	YHR132W-A	IGO2	+	122	1.17384	0.757423	0.90128	-0.335423
chrVII	788221	788616	YGR148C	RPL24B	-	395	2.80448	1.97043	2.13972	6.15362
chrV	399260	399400	YER118C	SHO1	-	140	1.20307	0.848771	0.911236	-0.123836
chrV	302577	302712	YER072W	VTC1	+	135	1.79233	1.81487	1.46645	1.83149
chrIX	397105	397227	YIR021W	MRS1	+	122	0.994558	0.60697	1.15565	0.0287885
chrIV	1385828	1385986	YDR461C-A	0	-	158	1.8451	1.35163	1.23577	-0.0478013
chrIV	1319278	1319414	YDR423C	CAD1	-	136	0.773388	0.895363	0.771793	-0.193147
chrIV	945192	945321	YDR240C	SNU56	-	129	0.435013	1.08031	1.06961	-0.0293155
chrIV	657518	657724	YDR101C	ARX1	-	206	2.32467	1.43849	1.85486	0.42999
chrIV	286766	286990	YDL095W	PMT1	+	224	2.34611	1.69186	1.60937	-0.152155
chrIV	264184	264422	YDL111C	RRP42	-	238	1.35311	1.2175	1.29614	-0.318357
chrXVI	195644	195780	YPL186C	UIP4	-	136	0.825457	0.518007	0.797813	0.0447706
chrXV	956626	956747	YOR338W	0	+	121	1.27692	0.457022	1.01065	-0.0185017
chrXIV	643565	643686	YNR010W	CSE2	+	121	-0.0019314	0.733229	0.693649	-0.662064
chrXIV	86043	86177	YNL291C	MID1	-	134	1.03659	0.859503	0.974278	-0.480114
chrXII	1011323	1011470	YLR436C	ECM30	-	147	1.65066	0.851675	1.72922	0.00970408
chrXII	302035	302156	YLR085C	ARP6	-	121	1.11111	1.02932	1.07709	-0.401198
chrXII	262889	263132	YLR061W	RPL22A	+	243	2.65271	1.66593	1.99031	2.75194
chrXII	111650	111774	YLL018C	DPS1	-	124	0.84021	0.190529	0.397334	0.748605
chrXI	608473	608767	YKR090W	PXL1	+	294	1.51528	2.93086	2.59176	1.52754
chrXI	315858	315985	YKL065W-A	0	+	127	0.56159	0.651145	0.803585	0.351627
chrXI	296234	296355	YKL074C	MUD2	-	121	1.31559	0.859005	0.869897	0.420246
chrX	144947	145071	YJL145W	SFH5	+	124	1.26588	1.16244	1.47138	1.34331
chrX	63612	63734	YJL197W	UBP12	+	122	0.16029	0.428434	0.542264	-0.388882
chrVIII	284663	284796	YHR090C	YNG2	-	133	0.884267	0.874562	0.832285	-0.576479
chrVIII	272434	272586	YHR082C	KSP1	-	152	1.92564	1.32172	1.46854	0.439474
chrVIII	164785	164932	YHR027C	RPN1	-	147	1.13581	0.493881	0.633036	-0.066385
chrVII	756529	756650	YGR132C	PHB1	-	121	1.04485	0.717471	0.934411	-0.104911
chrVII	411336	411459	YGL048C	RPT6	-	123	0.898946	0.390996	0.701054	0.271765
chrV	101593	101781	YEL026W	SNU13	+	188	-0.177784	0.872934	0.214188	2.39571
chrIV	1476984	1477121	YDR517W	GRH1	+	137	1.87385	1.07927	1.48687	0.695698
chrIV	1294469	1294613	YDR411C	DFM1	-	144	1.70942	1.07202	1.36488	-0.502707
chrIV	1126090	1126243	YDR328C	SKP1	-	153	1.24259	0.77994	0.852986	-0.0912039
chrIV	1103577	1103699	YDR318W	MCM21	+	122	1.34416	1.33883	1.42501	0.865227
chrIV	562517	562645	YDR054C	CDC34	-	128	1.70472	1.22699	1.56909	0.532584
chrIV	215810	216005	YDL137W	ARF2	+	195	1.80814	1.35582	1.38903	0.350254
chrIV	174640	174798	YDL157C	0	-	158	1.07016	0.885756	0.999811	-0.614552
chrIV	93976	94116	YDL204W	RTN2	+	140	1.26038	1.07783	1.07652	-0.933377
chrIV	87289	87460	YDL208W	NHP2	+	171	1.64838	1.84513	1.60464	-0.659182
chrIII	23419	23540	YCL059C	KRR1	-	121	0.793195	0.498135	0.702837	-0.337421
chrII	592837	593188	YBR181C	RPS6B	-	351	3.16714	2.12127	2.38201	4.86899
chrXVI	432421	432541	YPL061W	ALD6	+	120	0.394192	0.397668	0.33748	0.0834775
chrXV	761314	761505	YOR224C	RPB8	-	191	0.32032	1.80402	1.4925	-1.26768
chrXV	649066	649238	YOR167C	RPS28A	-	172	2.38356	1.85318	1.89374	-0.667228
chrXV	631842	632085	YOR157C	PUP1	-	243	3.27695	2.4969	2.73097	-0.211409
chrXV	560730	560855	YOR126C	IAH1	-	125	1.40485	0.737932	1.04903	0.101096
chrXIV	499429	499629	YNL067W	RPL9B	+	200	1.98192	1.4301	1.4355	0.0450315
chrXIV	174603	174846	YNL251C	NRD1	-	243	2.88331	1.89434	2.03108	-0.01603
chrXIV	116584	116812	YNL277W-A	0	+	228	1.71383	0.875361	1.03383	1.35187
chrXIV	107515	107638	YNL282W	POP3	+	123	1.51671	0.986119	1.10283	-0.150858
chrXIII	637099	637291	YMR188C	MRPS17	-	192	2.04769	1.35286	1.43088	-0.527802
chrXIII	445251	445378	YMR088C	VBA1	-	127	1.18278	0.970034	1.07764	-0.180293
chrXIII	131674	131804	YML071C	COG8	-	130	1.51542	0.805375	1.14536	0.280166
chrXII	579080	579226	YLR221C	RSA3	-	146	0.740673	0.328638	0.456651	1.84115
chrXII	266970	267090	YLR065C	ENV10	-	120	0.751992	0.39365	0.678867	-0.7243
chrXII	49669	49837	YLL043W	FPS1	+	168	1.98493	1.2028	1.71293	0.698733
chrXI	207941	208097	YKL125W	RRN3	+	156	1.88383	0.981704	1.49968	-0.106724
chrXI	98364	98538	YKL183W	LOT5	+	174	0.85953	0.802624	1.0165	0.619485
chrX	578240	578375	YJR077C	MIR1	-	135	1.54822	0.85427	1.28981	-0.653037
chrX	554887	555130	YJR063W	RPA12	+	243	1.51131	2.38924	2.16284	0.671451
chrVII	953570	953690	YGR231C	PHB2	-	120	1.63589	1.45773	1.18191	0.121683
chrVII	871495	871659	YGR187C	HGH1	-	164	0.43153	0.364282	0.447505	0.194517
chrVII	364081	364283	YGL077C	HNM1	-	202	0.483897	0.728113	0.380146	0.336344
chrVII	197919	198053	YGL162W	SUT1	+	134	0.91396	0.710866	0.871772	0.0777806
chrV	270228	270596	YER056C-A	RPL34A	-	368	3.38027	2.5668	2.90106	6.07135
chrIX	160524	160655	YIL108W	0	+	131	1.09015	0.798655	0.657479	-0.281953
chrIV	1436718	1436840	YDR494W	RSM28	+	122	1.05681	1.06454	0.995231	0.929049
chrIV	854017	854147	YDR198C	RKM2	-	130	-0.395723	0.361985	0.4534	-0.738698
chrIV	811712	812082	YDR174W	HMO1	+	370	2.50962	1.75155	1.97909	4.56267
chrIV	683616	683756	YDR116C	MRPL1	-	140	0.0644271	0.894267	1.30207	-0.446779
chrIV	388909	389036	YDL036C	PUS9	-	127	0.991832	0.437936	0.736354	0.876866
chrIII	238723	238889	YCR069W	CPR4	+	166	1.80034	1.23743	1.44905	-0.14262
chrIII	107824	107944	YCL005W	LDB16	+	120	1.30874	1.07689	1.21957	-1.28669
chrII	742606	742745	YBR269C	SDH8	-	139	1.16344	0.88626	1.21961	-0.128386
chrII	492895	493032	YBR127C	VMA2	-	137	0.999755	0.927068	1.10397	0.249721
chrII	454622	454752	YBR107C	IML3	-	130	1.32072	0.66826	0.943683	-0.158697
chrII	191789	191917	YBL017C	PEP1	-	128	1.82641	1.22823	1.72823	0.490449
chrII	62712	62832	YBL086C	0	-	120	1.4168	0.360192	0.805012	-0.52555
chrXVI	919089	919270	YPR190C	RPC82	-	181	1.98195	1.38421	1.45547	-0.733685
chrXVI	497772	497959	YPL028W	ERG10	+	187	2.24733	1.85535	1.82857	1.8114
chrXVI	455016	455261	YPL055C	LGE1	-	245	3.40275	2.45353	2.77879	1.58248
chrXVI	264380	264505	YPL153C	RAD53	-	125	1.04172	0.630784	1.25649	-0.05048
chrXV	1028711	1029014	YOR369C	RPS12	-	303	2.95316	2.02998	2.27319	2.08077
chrXV	939466	939585	YOR329C	SCD5	-	119	0.696087	1.05422	1.05468	-0.252083
chrXV	868138	868257	YOR293C-A	0	-	119	1.36144	0.829509	0.948855	1.13884
chrXV	784677	784796	YOR239W	ABP140	+	119	1.05937	0.700149	1.01714	0.0934765
chrXV	111916	112035	YOL108C	INO4	-	119	1.12568	1.04599	1.07751	0.276673
chrXIV	145324	145471	YNL265C	IST1	-	147	0.654358	0.836269	0.707675	1.91071
chrXIII	901353	901628	YMR314W	PRE5	+	275	0.661012	3.03963	2.46916	-0.735179
chrXIII	540116	540547	YMR135C	GID8	-	431	3.29618	2.33085	2.61376	1.33215
chrXIII	370564	370703	YMR049C	ERB1	-	139	0.72584	0.820581	0.879176	-0.172755
chrXII	573806	573937	YLR219W	MSC3	+	131	1.73579	1.10014	1.61502	-0.559202
chrXII	322123	322247	YLR091W	GEP5	+	124	0.729702	0.681765	0.77836	-0.198915
chrX	598393	598622	YJR091C	JSN1	-	229	2.73783	2.00347	1.91956	0.227295
chrVIII	498909	499038	YHR200W	RPN10	+	129	0.975939	0.880054	0.731516	-0.637944
chrVIII	490442	490561	YHR195W	NVJ1	+	119	1.74574	1.15865	1.57057	-0.373007
chrVIII	328112	328240	YHR107C	CDC12	-	128	1.02454	0.712637	0.920895	-1.21917
chrVIII	117589	117769	YHR006W	STP2	+	180	1.11025	0.908342	1.01872	1.05655
chrVII	1038567	1038693	YGR271C-A	EFG1	-	126	0.905617	0.765539	0.834899	1.4273
chrVII	982175	982338	YGR245C	SDA1	-	163	-0.0576282	0.807607	1.09214	0.460613
chrVII	962129	962277	YGR235C	MIC26	-	148	1.20432	1.37059	1.20854	1.71968
chrVII	646897	647038	YGR083C	GCD2	-	141	0.391035	0.466735	0.737196	-0.922394
chrVI	106321	106785	YFL016C	MDJ1	-	464	3.04517	2.1899	2.52015	0.76252
chrV	394031	394188	YER114C	BOI2	-	157	1.95791	0.891832	1.15228	0.762678
chrV	148005	148124	YEL003W	GIM4	+	119	1.30461	0.768608	1.09623	0.826048
chrIX	216491	216622	YIL076W	SEC28	+	131	1.09699	0.783986	0.933676	0.790268
chrIV	1301302	1301559	YDR418W	RPL12B	+	257	2.98498	2.18956	2.30398	5.89514
chrIV	1108520	1108639	YDR320C-A	DAD4	-	119	1.54381	1.27533	1.55467	-0.490936
chrIV	1039579	1039698	YDR289C	RTT103	-	119	0.356368	0.586434	0.806436	-0.274866
chrIV	744041	744193	YDR143C	SAN1	-	152	-2.38879	0.983396	0.687418	-0.2439
chrIV	560783	560973	YDR052C	DBF4	-	190	1.30094	1.51654	1.20935	0.571236
chrIV	326235	326396	YDL074C	BRE1	-	161	1.4124	0.577657	0.959653	-0.57242
chrIV	221307	221447	YDL134C	PPH21	-	140	1.62026	0.949643	1.15707	0.722776
chrIII	178264	178533	YCR031C	RPS14A	-	269	3.0735	2.14388	2.44373	4.01542
chrII	618607	618779	YBR198C	TAF5	-	172	1.7484	1.4289	1.42394	0.354431
chrII	419279	419414	YBR085C-A	0	-	135	1.89396	1.43989	1.86775	0.535676
chrI	129080	129216	YAL014C	SYN8	-	136	1.27076	0.768824	1.17383	-1.25699
chrXVI	581265	581480	YPR010C	RPA135	-	215	1.51291	1.14608	1.13616	-1.15454
chrXVI	259413	259569	YPL155C	KIP2	-	156	1.79518	1.00696	1.4581	0.315257
chrXIV	723190	723367	YNR053C	NOG2	-	177	1.73995	1.35535	1.49466	-0.269455
chrXIV	585380	585510	YNL025C	SSN8	-	130	0.772969	0.983538	1.04232	-0.369138
chrXIV	439348	439473	YNL099C	OCA1	-	125	0.680088	1.07791	0.842937	1.25503
chrXIII	500067	500185	snR24	SNR24	-	118	0.0253178	-0.210478	-0.196922	0.881171
chrXIII	348301	348476	YMR038C	CCS1	-	175	-0.358725	1.31524	1.26041	-0.324415
chrXIII	321726	321870	YMR024W	MRPL3	+	144	0.940599	1.03133	1.05957	-0.0912639
chrXIII	67588	67728	YML103C	NUP188	-	140	1.42787	0.831364	1.13871	-0.37977
chrXIII	41868	42010	YML115C	VAN1	-	142	1.11145	0.630493	0.96463	-0.634817
chrXII	932568	932722	YLR407W	0	+	154	1.46409	0.892464	1.14816	0.901516
chrXII	720438	720556	YLR292C	SEC72	-	118	-0.5619	0.742085	0.541771	-0.0869864
chrXII	705007	705128	YLR283W	0	+	121	1.04124	0.720558	0.85769	0.0931066
chrXII	559286	559432	YLR208W	SEC13	+	146	1.48795	0.964368	1.31723	-0.709788
chrXII	208549	208689	YLR033W	RSC58	+	140	1.1023	0.560907	0.891991	0.189692
chrXII	202651	202908	YLR029C	RPL15A	-	257	2.07746	1.73425	1.67705	0.763344
chrXI	521766	521884	YKR044W	UIP5	+	118	0.794992	0.79781	0.949292	-0.76502
chrXI	489771	489889	YKR026C	GCN3	-	118	0.115064	1.10591	1.14664	0.0443839
chrXI	426007	426178	YKL009W	MRT4	+	171	1.71595	0.808253	1.19233	0.197448
chrXI	158327	158559	YKL156W	RPS27A	+	232	2.52063	1.73614	1.95024	1.70512
chrX	157991	158113	YJL134W	LCB3	+	122	0.92991	0.609184	0.493319	1.12701
chrX	129030	129170	YJL156C	SSY5	-	140	0.688029	0.688907	1.2464	-0.0984643
chrX	100946	101088	YJL171C	0	-	142	2.27301	1.53042	2.03582	-0.328415
chrVIII	393346	393489	YHR147C	MRPL6	-	143	1.46625	0.70452	1.0602	0.676604
chrVIII	283378	283541	YHR089C	GAR1	-	163	1.40134	1.23035	1.41362	0.444302
chrVIII	160555	160698	YHR026W	VMA16	+	143	1.01056	0.365262	0.692438	0.0770245
chrVII	939679	939873	snR7-S	SNR7-S	-	194	1.56845	1.53587	1.41041	0.248213
chrVII	648117	648235	YGR084C	MRP13	-	118	1.46509	0.613615	0.91211	0.402565
chrVII	228385	228733	YGL147C	RPL9A	-	348	2.23304	1.62584	1.72843	1.82727
chrVI	153201	153321	YFR003C	YPI1	-	120	1.1482	0.732524	0.903617	-1.1887
chrVI	74654	75043	YFL033C	RIM15	-	389	3.04062	2.12467	2.11906	-0.0980679
chrV	305912	306262	YER074W	RPS24A	+	350	2.99645	2.16773	2.40398	5.47556
chrIX	268454	268579	YIL046W	MET30	+	125	1.65274	1.00392	1.27468	-0.352776
chrIX	257158	257610	YIL052C	RPL34B	-	452	3.01516	2.18227	2.50663	5.34736
chrIV	998452	998598	YDR264C	AKR1	-	146	1.04554	0.696362	0.741351	-0.17866
chrIV	666836	666954	YDR105C	TMS1	-	118	1.12772	1.10422	1.25069	-0.0680864
chrIII	193067	193255	YCR036W	RBK1	+	188	1.38388	1.09331	1.14894	0.851146
chrII	774529	774661	YBR286W	APE3	+	132	0.0309235	0.738922	0.507118	-0.382992
chrII	559827	559959	YBR160W	CDC28	+	132	0.0162758	0.99836	0.716148	0.432881
chrII	321668	321786	YBR042C	CST26	-	118	0.391903	0.685914	0.712337	0.0324576
chrII	242601	242754	YBR002C	RER2	-	153	1.64025	1.16565	1.49131	-0.476797
chrII	10572	10700	YBL107C	MIX23	-	128	1.21447	0.862659	0.867227	0.820356
chrXVI	814139	814256	YPR139C	LOA1	-	117	1.12982	0.437892	0.795564	0.0746231
chrXVI	404613	404902	YPL081W	RPS9A	+	289	2.13705	1.40226	1.73245	1.18548
chrXVI	267613	267730	YPL151C	PRP46	-	117	1.0321	0.825998	0.855121	0.175619
chrXVI	165901	166050	YPL203W	TPK2	+	149	1.38995	0.708595	0.669705	-0.252368
chrXVI	163932	164074	YPL204W	HRR25	+	142	1.18715	0.835697	0.670277	-0.368061
chrXVI	76322	76456	YPL249C-A	RPL36B	-	134	2.73915	1.95169	2.26152	3.91869
chrXV	518906	519033	YOR106W	VAM3	+	127	1.00672	0.650664	0.710616	0.669155
chrXIV	485355	485514	YNL075W	IMP4	+	159	1.56343	0.939094	1.15649	1.16661
chrXIV	52475	52592	YNL310C	ZIM17	-	117	1.01146	0.788785	1.00254	-0.668202
chrXIII	851654	851820	YMR290C	HAS1	-	166	1.79027	1.39436	1.58484	0.554799
chrXIII	742798	742930	YMR236W	TAF9	+	132	1.84362	1.38631	1.45582	-0.779409
chrXIII	668266	668426	YMR203W	TOM40	+	160	1.67599	0.932445	0.826529	-0.82021
chrXIII	343582	343702	YMR036C	MIH1	-	120	1.43288	1.17897	1.45261	0.0774767
chrXII	1053205	1053354	YLR455W	PDP3	+	149	-0.460326	0.172985	-0.0222443	1.35325
chrXII	990588	990723	YLR429W	CRN1	+	135	-0.0104904	0.426	0.474918	0.595967
chrXII	282524	282847	YLR074C	BUD20	-	323	2.22645	1.54719	1.89688	2.3538
chrX	667210	667341	YJR130C	STR2	-	131	1.12596	1.07659	1.23464	0.336693
chrVIII	302034	302206	YHR098C	SFB3	-	172	1.72525	0.852451	1.19425	-0.0135244
chrVIII	276592	276727	YHR085W	IPI1	+	135	0.695084	0.603618	0.810765	1.55338
chrVIII	151314	151554	YHR022C-A	0	-	240	1.57429	0.926388	1.09464	1.49183
chrVII	1063192	1063350	YGR285C	ZUO1	-	158	-0.325672	0.591616	0.943382	-1.39274
chrVII	999209	999341	YGR253C	PUP2	-	132	1.28837	1.06938	1.14429	1.21696
chrVII	555489	555727	YGR034W	RPL26B	+	238	2.7247	1.54351	1.95515	2.03257
chrVII	306354	306504	YGL106W	MLC1	+	150	1.5201	1.17283	1.30236	0.189671
chrVI	64062	64208	YFL034C-B	MOB2	-	146	0.0757562	0.255853	0.288892	0.252347
chrV	522722	523084	YER168C	CCA1	-	362	3.51716	2.62343	2.6235	-0.662469
chrV	307466	307589	YER074W-A	YOS1	+	123	1.22973	0.829561	0.933578	1.09075
chrV	208566	208716	YER026C	CHO1	-	150	1.44857	1.01394	0.690459	0.058276
chrIX	139349	139612	YIL118W	RHO3	+	263	1.58826	1.38449	1.50463	1.27244
chrIX	83098	83257	YIL142W	CCT2	+	159	0.877706	0.290242	0.602759	-0.731292
chrIV	1213678	1213837	YDR368W	YPR1	+	159	0.815213	0.821865	0.940722	0.716596
chrIV	1206457	1206605	YDR365C	ESF1	-	148	1.64973	1.1518	1.12567	-0.944527
chrIV	1168871	1169049	YDR346C	SVF1	-	178	1.62937	0.915039	1.32376	-0.833435
chrIV	884282	884656	YDR211W	GCD6	+	374	3.13704	1.63484	2.02057	-0.71363
chrII	680119	680285	YBR230W-A	0	+	166	2.45051	1.87886	2.07087	2.03835
chrII	356638	356775	YBR058C-A	TSC3	-	137	1.15189	0.995445	0.622251	-0.0663912
chrXV	1036562	1036736	YOR372C	NDD1	-	174	1.88363	1.20416	1.53544	0.644097
chrXV	931235	931500	YOR327C	SNC2	-	265	2.6279	1.76236	2.06761	0.396417
chrXV	813760	813905	YOR259C	RPT4	-	145	1.35377	0.657897	1.1427	-0.0727138
chrXV	762155	762271	YOR226C	ISU2	-	116	1.367	1.03806	1.15312	0.619303
chrXV	108973	109105	YOL110W	SHR5	+	132	1.86281	1.24537	1.65017	0.735186
chrXIV	34279	34406	YNL322C	KRE1	-	127	1.63963	1.40106	1.46082	-0.471525
chrXIV	19366	19530	YNL330C	RPD3	-	164	0.759133	0.613298	0.583598	-1.4072
chrXIII	388335	388516	YMR056C	AAC1	-	181	3.29982	2.44268	2.78859	4.04409
chrXII	1006167	1006283	YLR433C	CNA1	-	116	-0.893136	0.541095	0.662698	-0.670947
chrXII	965624	965752	YLR421C	RPN13	-	128	1.26665	0.777394	0.856083	0.146927
chrXII	540596	540745	YLR193C	UPS1	-	149	1.68942	1.02015	1.2215	0.58905
chrXII	337349	337470	YLR097C	HRT3	-	121	0.038338	0.0672727	0.122535	-0.506621
chrXII	198133	198295	YLR027C	AAT2	-	162	2.05622	1.34561	1.68459	-0.465571
chrXII	166199	166352	YLR008C	PAM18	-	153	2.22276	1.37854	2.03305	-0.451896
chrXII	40447	40606	YLL050C	COF1	-	159	1.71766	1.41181	1.65614	0.0146748
chrXI	286391	286507	YKL079W	SMY1	+	116	-0.0198517	0.903099	1.02539	-0.291137
chrXI	80619	80735	YKL192C	ACP1	-	116	2.07466	1.65948	1.57082	-0.525768
chrX	411049	411195	YJL013C	MAD3	-	146	0.713882	0.126993	0.628366	0.326771
chrX	333172	333324	YJL055W	0	+	152	1.44101	1.10099	1.14776	-0.297753
chrX	285309	285425	YJL081C	ARP4	-	116	0.256146	0.290455	0.502332	-0.55797
chrX	239186	239302	YJL099W	CHS6	+	116	0.529517	0.477722	0.921212	0.0898672
chrVIII	439153	439269	YHR167W	THP2	+	116	1.36533	1.0262	1.32954	-0.503558
chrVIII	78392	78508	YHL013C	OTU2	-	116	1.14536	0.740226	0.912822	0.472397
chrVII	1026721	1026883	YGR270W	YTA7	+	162	1.68107	1.25716	1.2171	0.171654
chrVII	974018	974345	YGR240C	PFK1	-	327	-0.216148	0.973952	0.308238	-0.0728982
chrVII	936917	937042	YGR220C	MRPL9	-	125	0.915685	0.268853	0.744943	0.979896
chrVII	213822	213938	YGL155W	CDC43	+	116	-0.114224	0.641372	0.219881	-0.575067
chrVII	187339	187455	YGL168W	HUR1	+	116	-0.664188	0.345275	0.0606707	1.64643
chrVI	229227	229363	YFR037C	RSC8	-	136	0.922443	0.481799	0.635737	-0.973534
chrV	404434	404604	YER122C	GLO3	-	170	1.26542	1.16798	1.21709	0.657942
chrV	349466	349600	YER094C	PUP3	-	134	1.84279	1.44663	1.661	-0.186212
chrV	258103	258279	YER052C	HOM3	-	176	1.72849	1.39986	1.45985	0.987316
chrV	126422	126554	YEL016C	NPP2	-	132	1.30997	0.820552	1.21642	-0.0715803
chrV	116988	117136	YEL020W-A	TIM9	+	148	0.277624	-0.10045	0.212722	-0.0794365
chrIX	291816	291960	YIL033C	BCY1	-	144	1.99657	1.49749	1.74284	-0.312757
chrIV	1266939	1267059	YDR397C	NCB2	-	120	2.02924	1.75459	1.87483	-0.438958
chrIV	1236221	1236444	YDR381W	YRA1	+	223	1.93275	0.923734	1.38679	0.39073
chrIV	765341	765638	YDR152W	GIR2	+	297	2.77667	2.08995	2.09734	0.273658
chrII	539773	539893	YBR149W	ARA1	+	120	1.1144	1.03635	1.17369	0.524259
chrII	532267	532444	YBR143C	SUP45	-	177	2.25238	1.87904	1.78754	1.6472
chrII	182145	182278	YBL021C	HAP3	-	133	1.33476	0.876399	1.062	-1.11512
chrI	113420	113536	YAL021C	CCR4	-	116	0.865284	0.486229	0.82976	-0.620021
chrXVI	887893	888008	YPR173C	VPS4	-	115	1.08387	0.611742	0.835177	-0.791786
chrXVI	614588	614724	YPR025C	CCL1	-	136	1.1979	0.774575	1.18143	-0.571207
chrXVI	46559	46720	YPL263C	KEL3	-	161	1.07384	0.960031	1.09483	1.01925
chrXVI	38893	39031	YPL266W	DIM1	+	138	0.594141	0.883943	0.620432	0.553006
chrXV	888810	888931	YOR305W	RRG7	+	121	1.32324	0.70773	0.963335	-0.918296
chrXV	830778	830969	YOR270C	VPH1	-	191	1.34327	1.18416	0.94857	0.213052
chrXV	364170	364296	YOR018W	ROD1	+	126	1.43243	0.790914	1.2146	0.0861238
chrXIV	625904	626044	YNL003C	PET8	-	140	1.58745	1.06191	1.29643	-0.164157
chrXIV	456209	456391	YNL090W	RHO2	+	182	2.09439	1.44919	1.48454	-0.0125396
chrXIV	182688	182826	YNL248C	RPA49	-	138	1.6115	0.827641	1.21495	-0.573406
chrXIII	687320	687444	YMR209C	0	-	124	1.06794	0.608076	1.00677	-0.551995
chrXIII	501944	502098	YMR117C	SPC24	-	154	1.58629	0.870326	1.30675	-0.172204
chrXIII	453830	453960	YMR093W	UTP15	+	130	1.36535	1.07136	1.19021	-0.967777
chrXII	1041575	1041695	YLR452C	SST2	-	120	1.46565	0.9136	1.0768	0.224304
chrXII	781891	782013	YLR326W	0	+	122	1.14542	0.678817	0.882966	0.530442
chrXII	545821	546037	YLR197W	NOP56	+	216	0.6266	0.855201	0.794444	2.81374
chrXII	423501	423637	YLR139C	SLS1	-	136	1.17456	0.736633	0.91054	-0.364691
chrXII	253166	253617	YLR055C	SPT8	-	451	3.40315	2.55833	2.72167	0.999978
chrXII	68298	68413	YLL036C	PRP19	-	115	1.11173	0.576795	0.781405	-0.22385
chrXI	625669	625810	YKR095W-A	PCC1	+	141	0.990174	0.571548	0.989783	0.47785
chrXI	462815	463021	YKR011C	0	-	206	1.32276	0.892587	1.02745	0.307148
chrXI	256563	256678	YKL099C	UTP11	-	115	1.21369	0.712681	0.70311	-0.518552
chrXI	247782	247897	YKL103C	APE1	-	115	1.79726	1.43118	1.68209	1.22479
chrXI	130404	130525	YKL170W	MRPL38	+	121	1.07478	0.653746	0.667479	-0.530336
chrX	690636	690795	YJR139C	HOM6	-	159	1.91344	1.46323	1.41182	-0.655935
chrX	559205	559362	YJR065C	ARP3	-	157	1.43195	0.680224	1.04545	-0.128145
chrX	316531	316662	YJL063C	MRPL8	-	131	1.98658	2.06427	1.9384	-0.829249
chrX	272610	272725	YJL087C	TRL1	-	115	1.47856	0.871139	1.27745	0.0599478
chrX	191523	191638	YJL118W	0	+	115	1.94205	1.2422	1.40004	-0.539487
chrX	106128	106326	YJL166W	QCR8	+	198	1.38155	1.09068	1.10449	-0.0769414
chrVIII	382813	383162	YHR141C	RPL42B	-	349	2.68569	1.74601	2.08208	6.24827
chrVIII	302535	302660	YHR099W	TRA1	+	125	1.00319	0.386028	0.796824	-0.253672
chrVIII	34217	34338	YHL034C	SBP1	-	121	1.16527	0.318106	0.520988	0.127145
chrVII	409788	409903	YGL049C	TIF4632	-	115	1.29481	0.496115	0.956902	0.136055
chrV	484380	484499	YER156C	0	-	119	1.18405	0.5826	0.86482	-0.0335134
chrV	150096	150234	YEL002C	WBP1	-	138	0.785186	0.480378	0.533919	1.27995
chrV	73396	73575	YEL042W	GDA1	+	179	-1.85458	0.341153	-0.317527	-0.465467
chrV	33719	33980	YEL063C	CAN1	-	261	3.29385	2.37289	2.58022	0.735558
chrIX	415731	416002	YIR033W	MGA2	+	271	3.03058	2.6112	2.56603	-0.0913978
chrIX	292303	292440	YIL031W	ULP2	+	137	1.10002	0.577242	0.718485	1.88721
chrIX	241853	241993	YIL064W	EFM4	+	140	1.13167	0.728501	1.09508	0.905979
chrIX	68456	68647	YIL148W	RPL40A	+	191	2.87495	2.01168	2.2391	6.23555
chrIV	1229651	1229775	YDR378C	LSM6	-	124	0.97976	0.756657	0.619519	-0.289406
chrIV	971503	971637	YDR257C	RKM4	-	134	0.462439	0.422169	0.503281	1.12793
chrIV	870900	871015	YDR210W	0	+	115	1.40445	1.13327	1.15973	0.631678
chrIV	578394	578531	YDR063W	AIM7	+	137	0.335852	0.460586	0.200588	0.712316
chrIV	89891	90014	YDL206W	0	+	123	0.768898	0.7858	0.840475	0.37438
chrIII	22181	22296	YCL061C	MRC1	-	115	0.658517	0.648314	0.655852	0.0641948
chrII	444771	444929	YBR101C	FES1	-	158	2.25064	1.32249	1.91108	-0.468706
chrII	167898	168360	YBL028C	0	-	462	2.2571	1.68158	1.88437	5.58863
chrII	142930	143050	YBL040C	ERD2	-	120	1.00606	0.567042	0.687392	-0.146133
chrI	138451	138571	YAL007C	ERP2	-	120	1.61296	0.766113	0.928183	-0.213516
chrI	76230	76372	YAL035W	FUN12	+	142	1.77201	0.609834	1.46034	-1.07487
chrI	52668	52809	YAL049C	AIM2	-	141	0.396048	-0.0214965	0.0297943	-0.834243
chrXVI	643587	643779	YPR036W	VMA13	+	192	2.08607	1.44325	1.5863	-0.0557297
chrXVI	479041	479155	YPL040C	ISM1	-	114	1.08833	0.859478	1.08346	-0.470539
chrXVI	458557	458723	YPL052W	OAZ1	+	166	1.21683	1.26231	0.914537	0.572829
chrXVI	272969	273178	YPL148C	PPT2	-	209	1.01568	0.963873	1.01898	0.666393
chrXVI	135547	135743	YPL220W	RPL1A	+	196	2.44493	1.87911	2.081	0.0339561
chrXVI	102999	103113	YPL236C	ENV7	-	114	1.36782	1.08785	1.21785	0.710196
chrXV	733520	733687	YOR207C	RET1	-	167	1.87267	1.4417	1.42681	-0.371414
chrXV	570928	571052	YOR130C	ORT1	-	124	1.11071	0.590076	0.672035	-0.325405
chrXV	285480	285773	YOL021C	DIS3	-	293	1.9314	2.28955	2.10164	0.759291
chrXV	201852	201967	YOL068C	HST1	-	115	0.979576	0.600157	0.60357	-0.524409
chrXV	103965	104143	YOL113W	SKM1	+	178	0.976672	0.63344	0.806625	0.291929
chrXIV	498537	498744	YNL068C	FKH2	-	207	2.66781	1.86402	2.28582	1.49038
chrXIV	418584	418740	YNL110C	NOP15	-	156	1.76867	1.17763	1.31787	0.591542
chrXIV	187836	187991	YNL243W	SLA2	+	155	2.62729	1.76199	2.15197	-0.712713
chrXIII	756329	756537	YMR243C	ZRC1	-	208	2.80347	1.75205	2.02392	0.758842
chrXIII	627921	628112	YMR183C	SSO2	-	191	2.54748	1.8576	2.12167	1.01794
chrXIII	352201	352499	YMR041C	ARA2	-	298	3.98423	2.00986	2.5823	0.186369
chrXIII	247488	247615	YML011C	RAD33	-	127	0.963994	0.34401	0.59688	-0.816413
chrXIII	124224	124633	YML073C	RPL6A	-	409	2.3279	1.4905	1.73406	5.7167
chrXII	725469	725583	YLR298C	YHC1	-	114	0.827833	0.415008	0.433811	0.989679
chrXII	380648	380810	YLR116W	MSL5	+	162	0.591983	0.601863	0.684867	0.518131
chrXI	640351	640498	YKR100C	SKG1	-	147	1.7361	1.04695	1.35679	-0.941427
chrXI	626379	626505	YKR096W	ESL2	+	126	1.22166	0.708409	1.14156	0.154227
chrXI	576049	576204	YKR071C	DRE2	-	155	-0.720749	1.47891	1.12132	-0.648503
chrXI	513193	513337	YKR038C	KAE1	-	144	3.06421	1.75754	2.14355	-0.710708
chrXI	511838	511952	YKR037C	SPC34	-	114	1.11452	0.920598	0.877582	-0.240547
chrXI	448088	448219	YKR004C	ECM9	-	131	0.305937	0.861972	1.20019	-0.233603
chrXI	234262	234379	YKL108W	SLD2	+	117	0.0768744	0.507721	0.339197	0.128298
chrXI	201845	201964	YKL128C	PMU1	-	119	1.02006	0.721994	0.808482	-0.381848
chrX	570694	570830	YJR070C	LIA1	-	136	0.861657	0.790344	1.03246	0.862496
chrX	432243	432357	YJL004C	SYS1	-	114	1.25452	1.18847	1.00109	0.902797
chrVIII	386990	387172	YHR143W-A	RPC10	+	182	1.18238	0.853256	0.743398	0.122431
chrVII	965748	965890	YGR237C	0	-	142	1.44174	0.990904	1.25174	2.07072
chrVII	858097	858211	YGR181W	TIM13	+	114	0.999414	0.534918	0.795763	-0.128433
chrVII	834557	834683	YGR168C	0	-	126	0.638497	0.794167	0.727111	0.00579445
chrVII	559046	559171	YGR036C	CAX4	-	125	1.08172	0.774027	0.915302	0.0120056
chrVII	511078	511199	YGR009C	SEC9	-	121	1.04313	0.709121	0.974039	0.833536
chrVII	502742	502860	YGR004W	PEX31	+	118	1.26903	0.521119	0.865966	-0.00574237
chrVII	270819	270933	YGL126W	SCS3	+	114	1.00945	0.81486	1.09982	-0.600181
chrVII	269156	269288	YGL129C	RSM23	-	132	0.65015	0.882303	0.843776	-0.622841
chrV	512272	512443	YER166W	DNF1	+	171	0.803667	0.500876	0.61716	0.935543
chrV	483125	483288	YER155C	BEM2	-	163	1.57724	1.14237	1.36798	0.432092
chrV	13382	13574	YEL072W	RMD6	+	192	0.289507	1.44716	1.38753	-0.637286
chrIV	827403	827517	YDR181C	SAS4	-	114	1.19233	1.28733	1.64094	-0.217872
chrIV	645022	645136	YDR098C	GRX3	-	114	2.57226	1.21799	1.86229	-0.245281
chrIV	361384	361501	YDL054C	MCH1	-	117	1.54239	1.3312	1.3919	0.639292
chrIV	337323	337437	YDL064W	UBC9	+	114	0.684682	0.381512	0.570583	0.256975
chrIV	307847	308358	YDL082W	RPL13A	+	511	2.76336	2.50685	2.58127	5.47078
chrIV	202647	202769	YDL142C	CRD1	-	122	1.24986	0.780271	1.05951	-0.788907
chrIV	101119	101240	YDL200C	MGT1	-	121	0.7702	0.215886	0.418894	-0.274942
chrIII	242397	242561	YCR072C	RSA4	-	164	0.851396	1.36242	1.39427	-0.122327
chrIII	224273	224387	YCR060W	TAH1	+	114	1.21013	0.870339	1.00989	-1.20621
chrII	382967	383100	YBR073W	RDH54	+	133	1.68727	1.24773	1.60647	0.0890504
chrII	206980	207131	YBL010C	0	-	151	1.42306	1.05522	1.44258	-0.121397
chrI	99805	99929	YAL026C	DRS2	-	124	0.624075	0.421215	0.53896	-0.465435
chrI	48327	48501	YAL051W	OAF1	+	174	2.00194	1.04932	1.61097	-0.45391
chrXVI	411960	412178	YPL075W	GCR1	+	218	2.1741	1.46405	1.46701	0.821191
chrXVI	100252	100429	YPL237W	SUI3	+	177	1.75429	1.54316	1.5566	0.107168
chrXVI	67538	67651	YPL255W	BBP1	+	113	1.35452	0.376935	0.793193	-0.265689
chrXV	1073953	1074129	YOR389W	0	+	176	1.41972	0.512953	1.08249	-0.832699
chrXV	554657	554778	YOR123C	LEO1	-	121	0.652701	0.62953	0.52375	0.328944
chrXV	326476	326789	YOR001W	RRP6	+	313	-0.805715	-0.678683	-0.672551	0.654173
chrXIV	651762	652019	YNR013C	PHO91	-	257	2.35159	1.49839	1.55288	0.932816
chrXIV	412568	412709	YNL113W	RPC19	+	141	1.65342	1.5557	1.29358	0.380223
chrXIII	21752	21872	YML125C	PGA3	-	120	0.196275	0.738155	0.152792	-1.89472
chrXII	988198	988319	YLR427W	MAG2	+	121	0.787804	0.591213	0.776351	-0.408223
chrXII	871429	871612	YLR375W	STP3	+	183	2.27641	1.91121	2.01139	-0.0767366
chrXII	81119	81310	YLL029W	FRA1	+	191	2.34343	1.68968	2.19361	-0.122902
chrXI	273238	273351	YKL089W	MIF2	+	113	0.275099	0.755715	0.817502	0.253593
chrXI	242785	242898	YKL105C	SEG2	-	113	1.00142	0.452605	0.819066	0.0466522
chrXI	78693	78806	YKL194C	MST1	-	113	0.22461	0.696956	0.720732	-1.53131
chrX	617843	618139	YJR101W	RSM26	+	296	3.20491	1.94257	2.48483	0.508678
chrX	359741	359881	YJL044C	GYP6	-	140	1.41384	0.768811	1.15101	-0.40321
chrX	73466	73739	YJL192C	SOP4	-	273	3.3149	2.37131	2.46708	2.14797
chrVIII	314734	314852	YHR100C	GEP4	-	118	1.2397	1.06557	1.07454	-0.383441
chrVIII	241440	241579	YHR072W-A	NOP10	+	139	1.1331	1.3863	1.43268	2.39157
chrVIII	201393	201634	YHR047C	AAP1	-	241	2.28068	1.37143	1.71619	0.204664
chrVII	1017812	1017931	YGR262C	BUD32	-	119	1.23717	0.727955	0.906282	-1.50945
chrVII	1016792	1016905	YGR261C	APL6	-	113	0.931841	0.802645	0.913201	-0.894781
chrVII	787014	787140	YGR147C	NAT2	-	126	1.12689	0.71834	0.593581	0.419044
chrVII	671976	672147	YGR094W	VAS1	+	171	1.66802	1.12523	1.62034	1.00383
chrVII	522095	522221	YGR015C	0	-	126	1.02621	1.15244	1.22052	0.0173246
chrVII	200261	200388	YGL161C	YIP5	-	127	1.1174	0.806483	0.790929	0.4384
chrVI	81938	82051	YFL027C	GYP8	-	113	0.722109	0.898375	0.993775	0.528192
chrV	372069	372217	YER105C	NUP157	-	148	-2.10832	-0.131057	-0.131195	-1.80517
chrV	200896	201022	YER023W	PRO3	+	126	0.455984	0.3229	0.360478	-0.14526
chrIX	375207	375336	YIR010W	DSN1	+	129	1.05109	0.443036	0.801858	-1.17386
chrIV	1429061	1429464	YDR487C	RIB3	-	403	2.42187	1.74817	1.88682	1.98172
chrIV	1277381	1277562	YDR404C	RPB7	-	181	1.8772	1.5642	1.19775	0.175041
chrIV	977289	977420	YDR260C	SWM1	-	131	1.51853	1.14104	0.952158	0.486604
chrIV	842072	842263	YDR190C	RVB1	-	191	1.65862	1.12242	1.35018	0.49164
chrIV	452772	452968	YDR002W	YRB1	+	196	2.86031	1.69784	1.9103	-0.302541
chrIV	393972	394121	YDL033C	SLM3	-	149	1.35084	0.613549	1.15198	0.489241
chrIV	375332	375448	YDL044C	MTF2	-	116	0.750459	0.769466	0.795274	1.27437
chrIV	32092	32237	YDL236W	PHO13	+	145	0.978122	0.617565	0.71784	1.18854
chrII	782417	782552	YBR290W	BSD2	+	135	1.31827	1.14075	1.15578	-0.591272
chrII	653157	653281	YBR215W	HPC2	+	124	0.496253	0.962431	0.70191	-0.79134
chrXVI	676979	677121	YPR062W	FCY1	+	142	2.14591	1.40771	1.67459	-0.243848
chrXVI	230899	231051	YPL169C	MEX67	-	152	0.909584	0.634042	0.980151	1.25011
chrXVI	73946	74088	YPL252C	YAH1	-	142	1.55557	1.53422	1.67276	-0.870618
chrXVI	73074	73208	YPL253C	VIK1	-	134	2.13976	1.5659	1.90487	-0.383455
chrXV	921319	921458	YOR322C	LDB19	-	139	1.37743	0.875288	1.01616	-0.0163504
chrXV	853157	853307	YOR288C	MPD1	-	150	2.06114	1.26072	1.64393	0.262147
chrXV	807083	807244	YOR254C	SEC63	-	161	1.72243	1.16261	1.38738	0.193326
chrXV	747330	747474	YOR215C	AIM41	-	144	0.8922	0.494121	0.835294	-0.297057
chrXV	572941	573053	YOR131C	0	-	112	1.5319	0.958401	1.31806	-0.465693
chrXV	539531	539643	YOR115C	TRS33	-	112	0.544971	0.896863	0.675215	0.211302
chrXV	421722	421850	YOR048C	RAT1	-	128	1.08201	0.76867	1.0603	0.484863
chrXIV	668154	668308	YNR020C	ATP23	-	154	1.66908	1.4157	1.30048	-0.599869
chrXIV	586915	587050	YNL024C-A	KSH1	-	135	0.813626	0.718256	0.922641	-0.341841
chrXIV	378560	378692	YNL131W	TOM22	+	132	0.726745	0.702588	0.934632	0.198921
chrXIV	348595	348707	YNL151C	RPC31	-	112	1.76482	1.01136	1.41954	-0.701994
chrXIV	307186	307327	YNL176C	TDA7	-	141	1.37922	0.902543	1.23333	-0.0864411
chrXIV	251788	251989	YNL209W	SSB2	+	201	1.08871	1.64642	1.6047	1.16836
chrXIV	94995	95107	YNL286W	CUS2	+	112	0.0143098	0.262771	0.327805	0.347458
chrXIII	460587	460710	YMR097C	MTG1	-	123	0.525155	0.262819	0.351323	0.320475
chrXIII	397778	397890	YMR064W	AEP1	+	112	1.12135	0.865098	0.801077	-0.911712
chrXIII	382955	383072	YMR053C	STB2	-	117	1.32266	0.921465	1.12535	0.680758
chrXIII	366795	366930	YMR047C	NUP116	-	135	1.08598	0.917281	0.726589	0.0462
chrXIII	340947	341079	YMR034C	0	-	132	1.43347	0.867995	1.29281	-0.15199
chrXIII	97542	97654	YML086C	ALO1	-	112	0.937805	0.625766	0.944905	0.612157
chrXIII	79748	79860	YML097C	VPS9	-	112	1.55099	0.929173	1.14735	-0.809375
chrXIII	54590	54716	YML108W	0	+	126	0.695894	0.648198	0.823738	-0.748576
chrXII	855638	855803	YLR367W	RPS22B	+	165	2.17828	2.04091	2.08035	0.682111
chrXII	841131	841267	YLR357W	RSC2	+	136	1.80109	0.915068	1.5482	0.337278
chrXII	826585	826797	YLR347C	KAP95	-	212	2.11013	2.13904	2.06884	0.495983
chrXII	759056	759426	YLR312C	0	-	370	3.42036	2.57404	2.85695	0.867152
chrXII	645104	645283	YLR254C	NDL1	-	179	1.18248	0.811804	0.457649	-0.190986
chrXII	408219	408363	YLR133W	CKI1	+	144	0.853406	0.691948	0.770677	0.000515278
chrXII	265276	265388	YLR064W	PER33	+	112	0.852875	0.572187	0.7282	-0.80913
chrXI	547995	548131	YKR054C	DYN1	-	136	1.09254	0.708063	0.665524	-0.0853581
chrXI	179473	179618	YKL141W	SDH3	+	145	1.26722	0.939504	1.22304	-0.439465
chrX	594632	594783	YJR090C	GRR1	-	151	0.1445	0.322105	0.125016	2.435
chrX	247031	247152	YJL095W	BCK1	+	121	1.6434	1.03805	1.57269	0.257302
chrVIII	371634	371746	YHR134W	WSS1	+	112	1.07694	0.914093	1.20209	-0.544896
chrVIII	337854	337966	YHR114W	BZZ1	+	112	0.144341	0.521586	0.395905	0.790921
chrVIII	277765	277922	YHR086W	NAM8	+	157	0.83712	0.384834	0.808196	0.325055
chrVIII	115960	116245	YHR005C-A	TIM10	-	285	2.50917	1.46836	1.64627	0.301112
chrVII	1022410	1022575	YGR266W	0	+	165	1.40519	0.602979	1.22384	0.453206
chrVII	867575	867706	YGR185C	TYS1	-	131	1.34072	0.958676	0.730018	-1.44274
chrVII	827344	827465	YGR163W	GTR2	+	121	0.900869	0.616637	0.727305	0.761053
chrVII	676411	676523	YGR095C	RRP46	-	112	0.649141	0.673571	0.999008	0.920244
chrVII	491984	492096	YGL004C	RPN14	-	112	1.03818	0.598171	0.956518	2.22131
chrVII	254293	254521	YGL135W	RPL1B	+	228	3.21057	2.16225	2.64102	1.76674
chrVII	45273	45385	YGL242C	0	-	112	0.348437	0.681011	0.662593	1.05206
chrVI	233687	233925	YFR039C	OSW7	-	238	0.738605	2.37746	2.13033	0.934363
chrV	171899	172033	YER008C	SEC3	-	134	0.901516	0.435499	0.779505	0.610843
chrIX	363026	363159	YIR004W	DJP1	+	133	0.535834	0.810868	0.73941	-0.337904
chrIX	289059	289215	YIL035C	CKA1	-	156	1.99942	1.41397	1.47256	-0.372174
chrIV	1239134	1239361	YDR381C-A	0	-	227	1.66459	1.62088	1.29304	0.0144837
chrIV	940874	941034	YDR238C	SEC26	-	160	1.23166	0.581454	0.85128	0.165929
chrIV	363642	363853	YDL052C	SLC1	-	211	1.65251	1.33334	1.27293	0.294876
chrIV	148027	148139	YDL173W	PAR32	+	112	0.860512	0.697553	0.765706	0.524738
chrIII	207988	208100	YCR044C	PER1	-	112	1.1228	0.735612	1.24277	-0.998589
chrIII	199496	199635	YCR038C	BUD5	-	139	0.236742	0.0912468	0.124168	-1.03062
chrIII	65634	65761	YCL031C	RRP7	-	127	0.37197	0.709769	0.691979	-1.08552
chrII	686654	686780	YBR234C	ARC40	-	126	1.4373	0.544371	1.08174	-0.117005
chrII	581502	581632	YBR172C	SMY2	-	130	1.06378	0.623843	0.818408	-0.0898708
chrII	306033	306227	YBR034C	HMT1	-	194	0.682613	1.01205	1.12911	-0.615688
chrII	113479	113623	YBL056W	PTC3	+	144	1.71269	1.07801	1.34801	0.0406931
chrXVI	713079	713214	YPR088C	SRP54	-	135	0.961287	0.574353	0.624494	-0.98982
chrXVI	218425	218556	YPL175W	SPT14	+	131	1.03062	0.733658	0.804721	0.492061
chrXV	925219	925512	YOR326W	MYO2	+	293	3.25344	2.62484	2.63746	-0.868577
chrXV	800770	800881	YOR249C	APC5	-	111	0.575375	0.677041	0.636787	0.998994
chrXV	685545	685667	YOR188W	MSB1	+	122	1.65167	0.976706	1.35659	0.4299
chrXV	675698	675843	YOR181W	LAS17	+	145	0.968375	0.566116	0.834832	0.61515
chrXV	285920	286031	YOL020W	TAT2	+	111	1.16403	0.691167	0.565302	1.14737
chrXIV	730661	730780	YNR055C	HOL1	-	119	0.626055	0.732143	0.791818	0.490805
chrXIV	218756	218879	YNL230C	ELA1	-	123	1.12336	0.987433	0.995211	0.995272
chrXIV	146637	146748	YNL264C	PDR17	-	111	-0.434115	0.361534	0.247408	-0.886123
chrXIV	64628	64787	YNL301C	RPL18B	-	159	1.36094	0.948986	1.13757	0.800428
chrXIII	895516	895679	YMR309C	NIP1	-	163	1.8178	1.23703	1.18898	-0.0843472
chrXIII	818657	818768	YMR276W	DSK2	+	111	1.05953	0.787803	1.10956	-0.574056
chrXIII	789892	790063	YMR260C	TIF11	-	171	0.0367421	0.966675	0.75028	0.545284
chrXIII	739023	739140	YMR233W	TRI1	+	117	1.35348	1.01327	1.17363	0.198145
chrXIII	599204	599342	YMR168C	CEP3	-	138	1.32466	1.11103	0.952901	-0.382401
chrXIII	422220	422344	YMR077C	VPS20	-	124	1.32891	0.791023	0.945994	0.0438984
chrXIII	68055	68251	YML102W	CAC2	+	196	1.84376	1.29262	1.29781	-0.211196
chrXIII	58732	58843	YML105C	SEC65	-	111	-0.136602	0.748399	1.03331	-1.76199
chrXII	903431	903641	YLR390W-A	CCW14	+	210	2.81208	2.53901	2.30833	-0.0560714
chrXII	892907	893018	YLR384C	IKI3	-	111	0.790796	0.402834	0.245975	-0.562531
chrXII	857314	857466	YLR368W	MDM30	+	152	0.0719711	0.324741	0.377936	0.189155
chrXII	797258	797369	YLR335W	NUP2	+	111	2.9871	1.63722	1.93393	0.0176198
chrXII	498627	498849	YLR167W	RPS31	+	222	2.70085	1.77899	2.15858	2.11941
chrXII	201505	201617	YLR028C	ADE16	-	112	0.73365	1.06147	1.2586	1.25058
chrXII	196602	196814	YLR026C	SED5	-	212	1.3798	1.00328	1.2413	0.157394
chrXII	156396	156545	YLR002C	NOC3	-	149	1.32929	0.840368	1.26537	1.03832
chrXII	127319	127476	YLL011W	SOF1	+	157	1.92666	1.81174	1.58621	-0.800506
chrXI	599713	599824	YKR086W	PRP16	+	111	1.51174	0.969622	1.35713	-2.02231
chrX	90141	90604	YJL178C	ATG27	-	463	2.97548	2.20524	2.47207	4.62546
chrX	75372	75884	YJL189W	RPL39	+	512	3.00545	2.21546	2.53436	5.36348
chrVIII	242345	242457	YHR073W	OSH3	+	112	0.855307	0.739878	0.786179	-0.353116
chrVIII	195272	195395	YHR045W	0	+	123	1.51627	1.23462	1.46531	1.46372
chrVII	648993	649230	YGR085C	RPL11B	-	237	3.19228	2.23703	2.53523	2.60536
chrVII	389802	389918	YGL061C	DUO1	-	116	0.618621	0.544826	0.594672	0.732743
chrVII	196575	196703	YGL163C	RAD54	-	128	1.47398	0.90611	1.09184	0.0602289
chrVII	84317	84581	YGL219C	MDM34	-	264	1.94785	2.38993	2.20379	0.613114
chrV	432272	432407	YER133W	GLC7	+	135	1.70053	0.934733	1.49783	2.01075
chrV	131469	131627	YEL012W	UBC8	+	158	1.8901	1.33475	1.5	0.349479
chrIX	274955	275066	YIL043C	CBR1	-	111	0.542074	0.652231	0.618951	-0.999768
chrIV	1334007	1334122	YDR435C	PPM1	-	115	0.312728	0.494825	0.623376	-1.0881
chrIV	1067524	1067659	YDR302W	GPI11	+	135	1.46305	0.677811	1.2387	1.71385
chrIV	867607	867753	YDR207C	UME6	-	146	1.2399	0.904868	1.10719	0.469686
chrIV	539616	539760	YDR041W	RSM10	+	144	1.2374	0.83975	0.997138	0.978414
chrIV	423598	423709	YDL018C	ERP3	-	111	0.878477	0.704557	0.878327	-0.178899
chrIV	330531	330701	YDL072C	YET3	-	170	1.93806	1.45248	1.60185	1.08946
chrIV	70337	70448	YDL216C	RRI1	-	111	1.18779	0.476052	0.773094	0.799814
chrIII	210464	210580	YCR046C	IMG1	-	116	0.985119	0.989181	1.17627	-0.465826
chrIII	160472	160601	YCR023C	0	-	129	0.932566	0.933216	0.821398	0.513725
chrIII	131630	131748	YCR009C	RVS161	-	118	1.47487	0.999608	1.2578	0.762225
chrIII	111724	111835	YCL001W	RER1	+	111	1.1157	0.672395	0.868662	-0.107291
chrII	722447	722567	YBR252W	DUT1	+	120	0.00165415	1.21784	0.938924	-1.06581
chrII	604217	604455	YBR189W	RPS9B	+	238	2.87034	1.80404	2.06784	1.12259
chrII	318054	318186	YBR041W	FAT1	+	132	1.88691	1.66491	1.82426	-0.204747
chrXVI	639080	639190	YPR033C	HTS1	-	110	1.35135	1.11062	1.16058	-0.5962
chrXVI	563841	564013	YPR003C	0	-	172	1.27609	0.926197	1.25966	0.305438
chrXVI	423940	424050	YPL069C	BTS1	-	110	1.06101	0.670518	0.912509	0.166091
chrXVI	418159	418311	YPL072W	UBP16	+	152	-0.203812	0.962328	0.616336	-0.462484
chrXV	960273	960399	YOR340C	RPA43	-	126	1.72843	1.20364	1.19164	0.960491
chrXV	847199	847333	YOR281C	PLP2	-	134	1.3488	0.970902	1.1323	0.104113
chrXV	323033	323143	YOL003C	PFA4	-	110	1.00459	0.922815	0.975523	1.65526
chrXV	70109	70246	YOL135C	MED7	-	137	1.64518	1.23309	1.42936	-0.00635474
chrXIV	678549	678701	YNR029C	0	-	152	1.2771	1.27615	1.32503	-0.49588
chrXIV	665099	665283	YNR019W	ARE2	+	184	2.0284	1.36352	1.5904	0.305228
chrXIV	476677	476820	YNL081C	SWS2	-	143	0.885496	1.26885	0.991461	-0.762182
chrXIV	281605	282107	YNL190W	0	+	502	2.24197	1.96488	2.0491	1.21106
chrXIV	187579	187689	YNL244C	SUI1	-	110	2.6534	1.61796	1.96481	-0.48996
chrXIV	48077	48224	YNL313C	EMW1	-	147	2.37345	1.61759	1.56152	0.00402109
chrXIII	618289	618427	YMR178W	0	+	138	-0.057008	0.413204	0.441619	3.95538
chrXIII	517293	517451	YMR125W	STO1	+	158	0.489828	0.698054	0.903344	1.10819
chrXIII	504815	505107	YMR119W	ASI1	+	292	2.82983	1.93219	2.12124	0.0343113
chrXIII	251572	251742	YML009C	MRPL39	-	170	1.77701	1.14401	1.33635	0.188567
chrXIII	243968	244078	YML013W	UBX2	+	110	0.937158	0.519782	0.592087	-0.835978
chrXIII	228724	228850	YML023C	NSE5	-	126	1.59905	1.00031	1.36269	-0.0510857
chrXII	1014286	1014404	YLR438C-A	LSM3	-	118	2.14018	1.33855	1.63408	-0.31579
chrXII	712153	712263	YLR287C	0	-	110	0.854318	0.202296	0.537765	0.731121
chrXII	626370	626506	YLR244C	MAP1	-	136	0.93565	0.507119	0.721481	-0.944176
chrXII	624001	624111	YLR243W	GPN3	+	110	1.0186	0.614991	0.77095	-0.80359
chrXII	566338	566510	YLR212C	TUB4	-	172	0.94333	1.09048	1.13152	0.635357
chrXII	510217	510327	YLR176C	RFX1	-	110	0.960414	0.274866	0.630976	-0.434745
chrXII	399435	399593	YLR129W	DIP2	+	158	1.32994	0.88167	1.37197	0.230937
chrXII	66581	66708	YLL038C	ENT4	-	127	0.749945	0.796779	1.1256	-0.659592
chrXI	451260	451387	YKR006C	MRPL13	-	127	1.11325	0.608609	0.812446	-0.667424
chrXI	307124	307264	YKL069W	0	+	140	1.16908	0.748543	0.943393	0.222986
chrXI	200265	200391	YKL129C	MYO3	-	126	0.925649	0.626753	0.813334	-0.249908
chrXI	75618	75763	YKL196C	YKT6	-	145	1.49089	0.88411	0.991143	-1.52178
chrX	490917	491027	YJR032W	CPR7	+	110	1.22851	0.720208	1.04499	-1.36818
chrX	407353	407495	YJL014W	CCT3	+	142	1.02697	0.893694	0.436651	-0.517239
chrX	402512	402759	YJL020C	BBC1	-	247	0.213174	2.02729	1.17535	-0.813453
chrVIII	491712	491850	YHR196W	UTP9	+	138	0.780304	0.346983	0.540503	-0.879858
chrVIII	437067	437186	YHR165C	PRP8	-	119	1.00641	0.44615	0.438338	-0.955538
chrVIII	187716	187875	YHR039C-A	VMA10	-	159	1.89798	1.46421	1.63868	-0.255027
chrVII	1051767	1051952	YGR280C	PXR1	-	185	1.67969	1.11057	1.33245	-0.163992
chrVII	848468	848590	YGR175C	ERG1	-	122	0.761472	0.642782	0.344607	0.240561
chrVII	589514	589728	YGR047C	TFC4	-	214	2.62747	1.96117	2.32534	0.664511
chrVII	498068	498178	YGR001C	AML1	-	110	-0.0573673	0.411696	0.401411	0.239449
chrVII	448593	448733	YGL026C	TRP5	-	140	0.671566	0.446435	0.782082	-1.1246
chrVII	395845	395955	YGL057C	GEP7	-	110	0.962827	0.730541	1.02049	0.471891
chrVII	91302	91412	YGL212W	VAM7	+	110	0.736747	0.447538	0.641318	-1.46847
chrV	464931	465087	YER148W	SPT15	+	156	0.725662	0.438313	0.725734	1.39574
chrV	188110	188220	YER016W	BIM1	+	110	1.14411	0.903582	1.18286	-0.564664
chrV	166925	167035	YER007C-A	TMA20	-	110	-0.151886	0.677782	0.343605	0.829614
chrIX	155883	155993	YIL110W	HPM1	+	110	-0.265995	0.556647	0.621386	-1.03197
chrIV	1350040	1350186	YDR443C	SSN2	-	146	1.53298	0.656477	1.17286	0.452019
chrIV	1212643	1212766	YDR367W	KEI1	+	123	0.817641	0.910336	0.754151	1.84304
chrIV	1052308	1052430	YDR294C	DPL1	-	122	0.97091	0.7453	0.977249	0.976028
chrIV	926964	927148	YDR231C	COX20	-	184	2.27017	1.71122	1.94766	1.25726
chrIV	461407	461586	YDR006C	SOK1	-	179	3.09313	2.06652	2.53079	1.19744
chrIV	223837	223986	YDL132W	CDC53	+	149	0.967396	0.567143	0.829785	0.726162
chrIII	56628	56756	YCL038C	ATG22	-	128	1.05871	0.771008	0.70223	2.20138
chrII	779522	779632	YBR288C	APM3	-	110	0.868064	0.225744	0.80148	-0.372742
chrII	776322	776485	YBR287W	0	+	163	0.898924	0.712909	0.968953	-0.176007
chrII	611933	612043	YBR195C	MSI1	-	110	0.623637	0.451445	0.374355	0.766019
chrII	481025	481167	YBR120C	CBP6	-	142	1.3321	0.841688	1.19268	0.380573
chrII	426888	427103	YBR089C-A	NHP6B	-	215	2.79644	2.1859	2.2782	0.430137
chrII	258045	258201	YBR011C	IPP1	-	156	2.16566	1.54921	1.67398	-1.03473
chrXVI	870067	870216	YPR163C	TIF3	-	149	1.77302	1.14222	1.41406	1.08071
chrXVI	664773	664902	YPR051W	MAK3	+	129	1.11965	0.530471	0.787276	0.689308
chrXVI	554394	554530	YPL002C	SNF8	-	136	0.487049	0.480219	0.186478	-1.38703
chrXVI	514313	514436	YPL020C	ULP1	-	123	1.03396	0.973241	1.13415	0.946302
chrXVI	370712	370886	YPL093W	NOG1	+	174	2.02581	1.77233	1.56717	-0.50571
chrXVI	352418	352577	YPL106C	SSE1	-	159	0.00465032	1.09343	1.23062	1.09966
chrXVI	156254	156418	YPL210C	SRP72	-	164	0.60527	0.82891	0.880105	0.0111244
chrXVI	69088	69233	YPL254W	HFI1	+	145	0.979881	0.24445	0.283777	0.315573
chrXV	989468	989734	YOR349W	CIN1	+	266	2.32092	1.61458	1.98554	1.24262
chrXV	943442	943597	YOR330C	MIP1	-	155	2.74781	1.93326	2.30172	0.0204097
chrXV	922947	923056	YOR323C	PRO2	-	109	1.08962	0.222675	0.873798	-0.873496
chrXV	878171	878280	YOR299W	BUD7	+	109	0.950532	0.556141	0.588121	-0.523416
chrXV	633646	633755	YOR160W	MTR10	+	109	0.516772	0.798739	0.974194	0.83046
chrXV	609245	609381	YOR148C	SPP2	-	136	1.20777	0.667251	0.657932	-0.00619191
chrXV	490908	491099	YOR089C	VPS21	-	191	1.56979	1.12721	1.11878	0.207419
chrXV	444387	444632	YOR063W	RPL3	+	245	1.61341	1.07854	1.12391	0.616754
chrXV	342677	342853	YOR008C	SLG1	-	176	2.00452	1.33211	1.66764	0.814741
chrXV	273797	273929	YOL027C	MDM38	-	132	1.34036	0.916389	0.975695	-0.288458
chrXV	65422	65537	YOL138C	RTC1	-	115	1.11917	0.858548	1.22145	-0.63779
chrXIV	719080	719189	YNR051C	BRE5	-	109	1.40093	0.88961	0.894967	-0.511929
chrXIV	330890	331273	YNL162W	RPL42A	+	383	3.22788	2.36014	2.78938	6.13497
chrXIV	330180	330289	YNL162W-A	0	+	109	0.752223	0.437308	0.774328	1.20994
chrXIV	308677	308837	YNL175C	NOP13	-	160	1.65017	1.02513	1.37389	0.786799
chrXIV	292789	292943	YNL185C	MRPL19	-	154	0.119638	0.562994	0.652932	1.50843
chrXIII	779190	779346	YMR256C	COX7	-	156	2.05063	1.18398	1.9473	0.778312
chrXIII	475534	475680	YMR104C	YPK2	-	146	0.350352	0.443916	0.639232	1.85538
chrXIII	464878	464997	YMR099C	0	-	119	1.46726	1.08619	1.24035	-0.553618
chrXIII	413533	413698	YMR075W	RCO1	+	165	1.74784	1.42638	1.41232	0.627607
chrXIII	312072	312202	YMR019W	STB4	+	130	1.1162	0.665152	0.757594	0.92936
chrXIII	209077	209399	YML035C	AMD1	-	322	2.08697	1.35598	1.88389	0.962413
chrXIII	101651	101793	YML082W	0	+	142	1.33152	0.745815	1.11157	-0.170782
chrXII	818937	819247	YLR344W	RPL26A	+	310	2.8617	1.87955	2.06954	3.79642
chrXII	561779	561898	YLR209C	PNP1	-	119	1.16627	0.840448	1.24617	0.046458
chrXI	565934	566081	YKR065C	PAM17	-	147	0.563563	0.855346	0.674784	-1.30139
chrXI	374259	374385	YKL033W-A	0	+	126	0.274329	0.50274	0.786985	-0.0618325
chrXI	334043	334234	YKL057C	NUP120	-	191	-1.05301	0.779465	0.499774	-0.0496508
chrXI	176579	176692	YKL144C	RPC25	-	113	1.78641	1.16051	1.27393	-0.0288513
chrX	543903	544031	YJR057W	CDC8	+	128	1.0388	0.94251	0.909795	0.503777
chrX	442595	442812	YJR003C	0	-	217	1.46659	1.07054	1.47521	0.697276
chrX	424874	425006	YJL005W	CYR1	+	132	0.220233	0.0238788	0.193624	-0.122194
chrX	231135	231252	YJL102W	MEF2	+	117	1.50279	0.717762	1.276	0.4496
chrVIII	354620	354774	YHR123W	EPT1	+	154	1.33241	1.17791	1.07482	-0.252391
chrVIII	229099	229264	YHR065C	RRP3	-	165	-0.196119	1.46419	1.21067	0.192741
chrVIII	143652	143849	YHR020W	0	+	197	3.01974	2.13456	2.47947	-0.478798
chrVIII	48023	48197	YHL029C	OCA5	-	174	2.2811	1.66531	1.46921	0.847007
chrVII	401401	401510	YGL054C	ERV14	-	109	2.70801	1.82987	2.2082	-0.311764
chrVII	343124	343234	YGL091C	NBP35	-	110	0.610738	0.434875	0.463473	-0.328105
chrVII	314439	314568	YGL099W	LSG1	+	129	1.14016	1.05079	1.30869	0.484329
chrVII	311934	312144	YGL101W	0	+	210	1.33346	0.73683	0.989476	1.16576
chrVII	307187	307368	YGL105W	ARC1	+	181	0.915198	1.30455	1.11141	-0.689812
chrVII	304140	304265	YGL108C	0	-	125	0.340324	0.7722	0.978812	-1.09824
chrVII	120987	121117	YGL201C	MCM6	-	130	0.751032	0.357621	0.612566	0.107645
chrVII	38845	38974	YGL246C	RAI1	-	129	0.962929	0.821461	0.987043	-1.08246
chrVI	58315	58530	YFL036W	RPO41	+	215	2.3249	1.45141	1.5033	-0.569505
chrV	423169	423501	YER131W	RPS26B	+	332	3.43868	2.55345	2.87619	1.69185
chrV	332897	333060	YER087C-B	SBH1	-	163	0.601204	0.495582	0.537304	0.0743693
chrV	205043	205178	YER025W	GCD11	+	135	1.34877	0.867196	1.22068	-0.271494
chrV	162495	162666	YER006W	NUG1	+	171	1.62283	1.04902	1.50518	0.747777
chrV	106181	106332	YEL025C	0	-	151	1.60525	1.10042	1.27455	0.507399
chrIX	307991	308103	YIL026C	IRR1	-	112	1.0045	0.579243	0.750888	-0.637128
chrIX	273894	274023	YIL044C	AGE2	-	129	1.21622	1.17738	0.991713	-0.801443
chrIX	258366	258504	YIL051C	MMF1	-	138	1.69665	1.54823	1.64235	0.962607
chrIX	160268	160377	YIL109C	SEC24	-	109	1.23178	0.700142	0.792643	-0.11322
chrIV	1325345	1325482	YDR429C	TIF35	-	137	1.17881	0.605507	0.781855	-0.0515927
chrIV	1127638	1127764	YDR329C	PEX3	-	126	0.770698	0.595154	0.561279	-0.461057
chrIV	1059008	1059117	YDR298C	ATP5	-	109	1.61953	1.02531	1.18552	0.667373
chrIV	816604	816751	YDR177W	UBC1	+	147	1.14114	0.760245	0.771114	-0.903727
chrIV	265045	265203	YDL110C	TMA17	-	158	1.35833	0.802455	1.0006	-0.167839
chrIV	78244	78353	YDL212W	SHR3	+	109	1.35131	0.887367	1.03884	-0.324474
chrIII	106879	106988	YCL005W-A	VMA9	+	109	0.9657	0.904983	1.28448	-0.946369
chrIII	17005	17233	YCL063W	VAC17	+	228	2.46695	0.960088	1.36217	2.21866
chrII	558497	558622	YBR159W	IFA38	+	125	1.66734	1.12849	1.4517	-0.334506
chrII	315359	315480	YBR039W	ATP3	+	121	2.08	1.42354	1.78208	0.0155595
chrII	203145	203421	YBL011W	SCT1	+	276	2.67868	1.74802	2.27509	0.908803
chrI	158705	158836	YAR007C	RFA1	-	131	1.373	0.744259	1.02084	-0.777015
chrXVI	906775	906883	YPR185W	ATG13	+	108	0.408225	0.551133	0.641165	-1.17663
chrXVI	429666	429797	YPL063W	TIM50	+	131	0.539507	0.714182	0.779837	-0.534232
chrXVI	172823	173071	YPL199C	0	-	248	2.93222	1.97871	2.32491	1.26511
chrXVI	143239	143362	YPL217C	BMS1	-	123	1.0012	0.733473	1.0826	-0.0541431
chrXVI	79422	79544	YPL249C	GYP5	-	122	0.409093	0.521877	0.725067	0.506448
chrXVI	35043	35176	YPL268W	PLC1	+	133	0.267951	0.765032	0.639817	0.251614
chrXV	994907	995017	YOR350C	MNE1	-	110	0.294536	0.51381	0.768452	1.91493
chrXV	841129	841267	YOR276W	CAF20	+	138	1.49139	1.12466	1.45663	0.681787
chrXV	678854	679222	YOR182C	RPS30B	-	368	2.97009	2.21697	2.62585	1.32138
chrXV	644390	644501	YOR164C	GET4	-	111	1.2967	1.00614	1.12049	0.932164
chrXV	252720	252860	YOL041C	NOP12	-	140	1.64434	1.29782	1.13736	1.65098
chrXIV	417550	417774	YNL111C	CYB5	-	224	2.49817	1.9021	1.93666	0.0811018
chrXIV	342198	342359	YNL156C	NSG2	-	161	1.81548	1.36554	1.57361	0.253386
chrXIV	206763	206873	YNL236W	SIN4	+	110	0.869057	0.543295	0.74655	0.718111
chrXIII	863651	863769	YMR298W	LIP1	+	118	0.806613	1.11487	0.938519	-0.649316
chrXIII	788951	789075	YMR259C	TRM732	-	124	1.00715	0.447307	0.80439	0.117526
chrXIII	706945	707053	YMR218C	TRS130	-	108	0.980533	0.60418	1.1099	0.395087
chrXIII	693202	693310	YMR212C	EFR3	-	108	0.787476	0.750024	0.992843	-0.391285
chrXIII	121382	121503	YML074C	FPR3	-	121	0.790893	0.381112	0.799101	-0.080162
chrXIII	108564	108672	YML080W	DUS1	+	108	0.314763	0.190426	0.136106	-1.13706
chrXIII	23733	23909	YML124C	TUB3	-	176	1.74085	1.22182	1.30327	0.105341
chrXII	1027969	1028077	YLR447C	VMA6	-	108	1.61819	1.08278	1.0997	0.776128
chrXII	866897	867135	YLR372W	ELO3	+	238	1.92052	1.38541	1.74987	-0.0689567
chrXII	820289	820398	YLR345W	0	+	109	1.14062	0.785878	0.701397	1.23136
chrXII	796404	796662	YLR333C	RPS25B	-	258	2.61866	1.70956	1.76089	3.24941
chrXII	626978	627086	YLR246W	ERF2	+	108	0.790131	0.410693	0.816428	-0.432246
chrXII	543734	543870	YLR196W	PWP1	+	136	0.799379	0.601069	0.979997	1.65295
chrXII	495268	495376	YLR165C	PUS5	-	108	0.10047	0.220391	0.392383	0.873752
chrXII	23354	23464	YLL058W	0	+	110	1.27917	1.05888	0.970024	0.18466
chrXI	592592	592745	YKR082W	NUP133	+	153	1.02597	0.953135	0.937611	-0.720788
chrXI	551370	551593	YKR057W	RPS21A	+	223	-0.383745	1.61103	0.847558	-0.425353
chrXI	524015	524133	YKR045C	0	-	118	0.984672	0.919519	0.966654	-0.763088
chrXI	430694	430802	YKL006C-A	SFT1	-	108	1.40387	1.08151	1.02128	0.701961
chrXI	261952	262094	YKL095W	YJU2	+	142	1.63728	1.15962	1.63799	-0.0600676
chrXI	225939	226061	YKL113C	RAD27	-	122	1.4882	1.11165	1.07294	0.783568
chrXI	213059	213179	YKL122C	SRP21	-	120	1.16245	0.749711	1.01837	-0.795444
chrX	581665	581773	YJR080C	AIM24	-	108	1.35049	1.21888	1.47473	-1.35014
chrX	513868	513992	YJR041C	URB2	-	124	0.773848	0.615344	0.65244	-0.344606
chrX	419619	419742	YJL010C	NOP9	-	123	0.909123	0.335546	0.486757	0.0804748
chrX	393693	393884	YJL025W	RRN7	+	191	-0.0619513	0.617731	0.101261	0.851551
chrVIII	560090	560198	YHR219W	0	+	108	0	0	0	0
chrVIII	364269	364377	YHR129C	ARP1	-	108	0.857219	0.544091	0.677745	-0.100638
chrVIII	54670	54779	YHL025W	SNF6	+	109	2.25208	1.53463	1.79999	0.230684
chrVII	913331	913464	YGR209C	TRX2	-	133	1.06224	0.798433	0.955512	0.578317
chrVII	894380	894613	YGR198W	YPP1	+	233	1.88601	1.46537	1.78434	0.298855
chrVII	637645	637753	YGR076C	MRPL25	-	108	0.525181	0.446276	0.647258	-0.185742
chrVII	547317	547596	YGR031C-A	NAG1	-	279	2.91663	2.1861	2.3497	0.962064
chrVII	505904	506012	YGR005C	TFG2	-	108	1.19999	0.907404	1.07702	0.0657278
chrV	502938	503046	YER162C	RAD4	-	108	0.585337	0.481939	0.435167	-0.452715
chrV	254475	254625	YER051W	JHD1	+	150	0.973183	0.899517	0.913097	-0.368777
chrV	194612	194781	YER019C-A	SBH2	-	169	1.70163	1.29743	1.6269	-0.0485083
chrV	177627	177745	YER012W	PRE1	+	118	1.47463	0.616204	0.98945	-0.322852
chrIX	171567	171675	YIL103W	DPH1	+	108	-0.199622	0.474982	0.489623	2.04153
chrIX	96470	96592	YIL135C	VHS2	-	122	1.34204	0.942197	0.683574	-0.339825
chrIX	77366	77504	YIL145C	PAN6	-	138	0.593519	0.208584	0.610191	0.584845
chrIV	1485309	1485417	YDR522C	SPS2	-	108	-0.939477	0.365332	0.506531	1.39444
chrIV	1222474	1222642	YDR372C	VPS74	-	168	0.855804	1.03055	0.918377	1.2498
chrIV	1204246	1204354	YDR364C	CDC40	-	108	-0.712548	0.0448944	0.246617	0.644119
chrIV	1183047	1183219	YDR353W	TRR1	+	172	1.46057	0.946151	1.21924	0.139352
chrIV	886994	887135	YDR212W	TCP1	+	141	0.778396	1.0504	1.05163	1.49399
chrIV	808117	808246	YDR172W	SUP35	+	129	0.812317	0.40853	0.546685	0.538047
chrIV	628620	628768	YDR091C	RLI1	-	148	1.85704	0.936738	1.34929	-0.538976
chrIV	545994	546396	YDR044W	HEM13	+	402	2.44137	1.74067	1.90027	1.45744
chrIV	190667	190855	YDL147W	RPN5	+	188	2.00916	1.58908	1.774	0.286519
chrII	589226	589385	YBR179C	FZO1	-	159	2.22671	1.43693	1.68123	0.162226
chrII	299934	300103	YBR031W	RPL4A	+	169	0.790174	1.13956	1.01275	-0.461725
chrI	108683	108867	YAL023C	PMT2	-	184	1.0941	0.650442	0.386902	-0.242327
chrI	92531	92834	YAL029C	MYO4	-	303	1.3186	2.25853	2.15741	1.57978
chrXVI	866517	866664	YPR161C	SGV1	-	147	1.43111	0.950299	0.867793	0.0400558
chrXVI	818113	818269	YPR143W	RRP15	+	156	0.253507	0.94993	0.862404	0.816836
chrXVI	348335	348442	YPL108W	0	+	107	0.8807	0.525526	0.725369	0.486944
chrXVI	326366	326520	YPL118W	MRP51	+	154	0.285896	0.543012	0.874444	0.658443
chrXVI	254546	254672	YPL157W	TGS1	+	126	1.51432	0.927614	1.32595	0.51401
chrXV	574837	574999	YOR133W	EFT1	+	162	1.34094	1.33685	1.63	-0.373723
chrXV	453547	453654	YOR067C	ALG8	-	107	0.472435	0.722663	0.831491	-0.864666
chrXV	405456	405581	YOR038C	HIR2	-	125	1.94132	1.63753	1.81106	0.269505
chrXV	338695	338843	YOR006C	TSR3	-	148	-0.286543	1.04372	0.922334	-0.80041
chrXV	87255	87448	YOL123W	HRP1	+	193	2.60602	1.35201	1.86301	0.737221
chrXIV	579347	579454	YNL027W	CRZ1	+	107	0.911643	0.522006	0.853518	-0.252518
chrXIV	339415	339528	YNL159C	ASI2	-	113	1.60123	1.11734	1.20693	-0.67093
chrXIV	283898	284032	YNL189W	SRP1	+	134	1.70106	1.06963	1.08275	0.101703
chrXIV	55952	56087	YNL308C	KRI1	-	135	0.615913	0.833205	0.203895	-0.368484
chrXIV	37482	37600	YNL320W	0	+	118	0.722359	0.313454	0.370868	-1.25115
chrXIII	749768	749880	YMR239C	RNT1	-	112	0.885386	0.432475	0.516088	-0.0726304
chrXIII	684024	684139	YMR207C	HFA1	-	115	1.06204	0.261695	0.769148	-0.200449
chrXIII	230825	230932	YML021C	UNG1	-	107	0.781811	0.862327	0.87845	-0.200246
chrXIII	135277	135423	YML069W	POB3	+	146	0.872817	0.535727	0.553234	-0.514957
chrXII	1057174	1057288	YLR459W	GAB1	+	114	0.557237	0.478947	0.813386	0.166109
chrXII	934271	934394	YLR408C	BLS1	-	123	0.633367	0.172521	0.486716	0.682102
chrXII	929629	929767	YLR405W	DUS4	+	138	0.786578	0.660743	0.748863	0.0361449
chrXI	461375	461520	YKR010C	TOF2	-	145	-1.64221	0.946334	0.62019	1.72527
chrXI	255508	255647	YKL100C	0	-	139	1.61003	1.32158	1.85818	-0.0178921
chrXI	245596	245854	YKL104C	GFA1	-	258	2.18335	1.20999	1.49044	0.466513
chrXI	122337	122444	YKL173W	SNU114	+	107	0.865711	0.544922	0.95295	-0.9546
chrX	528532	528645	YJR050W	ISY1	+	113	1.03948	0.618262	0.813527	0.425829
chrX	302928	303043	YJL073W	JEM1	+	115	1.31335	0.878167	1.27986	0.0594287
chrX	278155	278300	YJL084C	ALY2	-	145	1.49025	0.874976	1.36954	-0.140307
chrX	146856	147041	YJL143W	TIM17	+	185	1.60601	1.07652	1.28065	-0.92906
chrX	47471	47631	YJL207C	LAA1	-	160	1.58266	0.779814	1.09516	1.33344
chrX	37753	37895	YJL209W	CBP1	+	142	1.26649	0.641238	1.08997	-0.989365
chrVIII	517333	517466	YHR208W	BAT1	+	133	1.57414	1.06175	1.28515	0.204541
chrVIII	129325	129438	YHR012W	VPS29	+	113	0.854104	0.845445	0.839083	1.2185
chrVII	1082747	1082883	YGR295C	COS6	-	136	1.3888	0.5229	0.973477	-0.12132
chrVII	1058810	1058997	YGR282C	BGL2	-	187	-0.684111	1.35254	1.10852	-1.02762
chrVII	887874	887981	YGR194C	XKS1	-	107	1.10834	0.498828	0.991181	-0.295045
chrVII	885860	885967	YGR193C	PDX1	-	107	1.28796	0.646015	0.738188	1.42634
chrVII	807796	807999	YGR159C	NSR1	-	203	2.25735	1.48617	1.67484	0.147045
chrVII	605597	605730	YGR057C	LST7	-	133	1.49687	1.00687	1.264	-0.253844
chrVII	601441	601589	YGR056W	RSC1	+	148	1.44533	1.01897	1.13029	1.14851
chrVII	499933	500066	YGR002C	SWC4	-	133	0.694774	0.18717	0.388856	-0.147858
chrVII	392037	392159	YGL059W	PKP2	+	122	1.11506	0.68866	1.00653	0.590434
chrVII	226151	226308	YGL148W	ARO2	+	157	1.37747	0.908762	1.39728	0.0201694
chrVII	81265	81404	YGL222C	EDC1	-	139	1.49496	1.23557	1.22316	-0.651904
chrVI	241489	241596	YFR044C	DUG1	-	107	0.842058	0.496478	0.717914	-0.587346
chrVI	44495	44650	YFL045C	SEC53	-	155	-0.0568097	0.651377	0.540848	-0.122019
chrV	60935	61071	YEL050C	RML2	-	136	1.61611	1.57678	1.8682	0.33834
chrIX	276352	276478	YIL042C	PKP1	-	126	1.46137	1.28507	1.34963	-0.943854
chrIX	102351	102602	YIL131C	FKH1	-	251	1.60802	2.65309	2.27363	1.3008
chrIV	1388582	1388731	YDR464W	SPP41	+	149	-2.68542	0.72029	0.0913255	0.311158
chrIV	1090158	1090325	YDR313C	PIB1	-	167	1.53089	0.876483	1.10766	-0.338123
chrIV	967879	968040	YDR255C	RMD5	-	161	1.14726	0.863463	1.15972	-0.311926
chrIV	579144	579403	YDR064W	RPS13	+	259	2.63465	1.87836	2.03806	1.43239
chrIV	565739	565862	YDR056C	0	-	123	1.10627	0.998163	1.07032	-0.182701
chrIV	458258	458381	YDR005C	MAF1	-	123	1.8517	0.893555	1.51581	0.764954
chrIV	421778	421914	YDL019C	OSH2	-	136	1.65145	0.915916	1.5582	0.990888
chrIV	340255	340375	YDL063C	SYO1	-	120	0.0314125	0.368517	0.431417	0.555821
chrIV	238743	238869	YDL126C	CDC48	-	126	1.36999	0.874549	1.12718	0.142239
chrIV	126475	126662	YDL185W	VMA1	+	187	1.58915	0.925288	1.22396	-0.957308
chrIV	125194	125301	YDL188C	PPH22	-	107	1.58388	0.750537	1.18473	-0.314927
chrIV	56734	56967	YDL224C	WHI4	-	233	1.68068	1.27114	0.56668	1.16072
chrIV	1666	1783	YDL248W	COS7	+	117	1.51191	0.473724	0.858397	-0.553395
chrIII	155125	155258	YCR020W-B	HTL1	+	133	1.53163	1.14021	1.46323	1.76454
chrII	811497	811614	YBR302C	COS2	-	117	1.56358	0.31664	0.893597	-0.405661
chrII	684810	684923	YBR233W-A	DAD3	+	113	0.47655	1.15038	1.20647	-0.654296
chrII	555620	556144	YBR157C	ICS2	-	524	2.15484	1.56689	1.75756	1.38276
chrII	544540	544834	YBR150C	TBS1	-	294	3.3663	2.28676	2.4689	0.436431
chrII	465981	466088	YBR112C	CYC8	-	107	1.69129	0.805494	1.29114	1.54942
chrII	447418	447525	YBR102C	EXO84	-	107	1.05428	0.635591	0.859132	0.999442
chrII	326167	326274	YBR044C	TCM62	-	107	1.99091	1.29311	1.64351	-0.280028
chrII	273774	273920	YBR017C	KAP104	-	146	1.26762	0.709195	0.846442	-0.566693
chrII	237549	237656	YBL001C	ECM15	-	107	1.34419	0.873448	1.07549	0.0208047
chrII	84321	84496	YBL076C	ILS1	-	175	1.37702	0.428767	0.789009	0.416714
chrII	39000	39107	YBL098W	BNA4	+	107	1.05533	0.47005	0.92164	0.599965
chrI	169050	169179	YAR014C	BUD14	-	129	1.32167	0.729971	0.944781	-1.13462
chrXVI	826644	826750	YPR147C	0	-	106	0.572775	0.362906	0.630794	0.00876604
chrXVI	692509	692623	YPR073C	LTP1	-	114	0.239989	0.327719	0.271037	1.34178
chrXVI	607373	607508	YPR022C	0	-	135	0.316235	0.640238	0.813773	-0.621053
chrXVI	593189	593353	YPR016C	TIF6	-	164	0.929173	1.02279	0.819088	0.218351
chrXVI	52720	52892	YPL259C	APM1	-	172	1.2471	1.91558	1.54373	0.94747
chrXVI	24734	24942	YPL273W	SAM4	+	208	1.78649	1.0403	1.37499	0.939402
chrXV	896445	896576	YOR308C	SNU66	-	131	0.17036	0.553553	0.250346	1.81914
chrXV	866668	867025	YOR293W	RPS10A	+	357	2.95694	1.98317	2.36207	5.52779
chrXV	220597	220712	YOL057W	0	+	115	1.24063	0.845617	1.2356	-0.781679
chrXV	154802	154908	YOL088C	MPD2	-	106	0.154126	0.801391	0.760223	-1.24579
chrXV	126721	126828	YOL102C	TPT1	-	107	1.50938	1.21438	1.53502	0.210327
chrXV	101278	101399	YOL115W	PAP2	+	121	0.805242	0.696514	0.927321	0.640409
chrXIV	724362	724468	YNR054C	ESF2	-	106	1.28943	1.1213	1.06512	0.256487
chrXIV	722125	722291	snR191	SNR191	-	166	-0.257631	-0.380375	-0.0248964	1.41212
chrXIV	488209	488342	YNL074C	MLF3	-	133	1.57619	0.932838	1.48678	-0.602067
chrXIV	318868	318974	YNL168C	FMP41	-	106	0.782774	0.718383	0.937887	0.135149
chrXIV	80461	80567	YNL293W	MSB3	+	106	0.790314	0.786639	0.736797	0.465341
chrXIV	76634	76766	YNL297C	MON2	-	132	0.845127	0.730395	0.682567	-0.390686
chrXIV	8181	8310	YNL336W	COS1	+	129	1.77233	0.478451	0.999437	-0.437975
chrXIII	564227	564359	YMR153W	NUP53	+	132	0.721789	0.530695	0.614857	-0.628458
chrXIII	159925	160070	YML057W	CMP2	+	145	2.16107	1.4333	1.88241	0.271934
chrXIII	20520	20626	YML126C	ERG13	-	106	1.1975	0.59406	0.762302	0.364977
chrXII	1022328	1022448	YLR443W	ECM7	+	120	1.09105	0.576243	0.904372	-0.233433
chrXII	787452	787604	YLR330W	CHS5	+	152	1.39101	0.960247	0.964008	-0.30157
chrXII	677758	677873	YLR266C	PDR8	-	115	0.97549	0.745828	0.90096	0.516046
chrXII	609586	609716	YLR234W	TOP3	+	130	1.21278	0.768591	1.11129	-0.138968
chrXII	552078	552215	YLR203C	MSS51	-	137	1.98134	1.45094	1.4784	-0.71901
chrXI	483232	483339	YKR022C	NTR2	-	107	1.37289	1.07557	1.38247	-0.634588
chrXI	346838	346967	YKL049C	CSE4	-	129	0.608638	0.634628	0.580572	0.17636
chrXI	248391	248523	YKL101W	HSL1	+	132	2.20396	1.3115	1.84935	0.153684
chrXI	230242	230394	YKL110C	KTI12	-	152	1.00628	1.03886	1.33973	0.820278
chrXI	173973	174100	YKL145W	RPT1	+	127	1.14082	0.716542	1.01916	0.700575
chrXI	108833	109204	YKL180W	RPL17A	+	371	2.55928	1.7343	2.01043	5.85181
chrX	165394	165503	YJL131C	AIM23	-	109	0.83948	0.340917	0.499007	1.07827
chrX	130826	130964	YJL155C	FBP26	-	138	-0.197875	0.663409	0.543903	-0.649612
chrX	71226	71343	YJL193W	0	+	117	0.949679	0.489207	0.569605	0.0750692
chrVIII	374446	374612	YHR135C	YCK1	-	166	1.36418	0.916027	1.16679	0.460948
chrVIII	336192	336298	YHR112C	0	-	106	1.20001	1.01087	1.21502	-0.0557925
chrVII	452157	452295	YGL023C	PIB2	-	138	1.63853	1.09307	1.34757	-1.22527
chrVII	321544	321709	YGL097W	SRM1	+	165	2.36431	1.38514	1.85065	-0.418605
chrVII	208705	208891	YGL157W	ARI1	+	186	2.15196	1.66402	1.91413	0.0216253
chrVII	58923	59063	YGL233W	SEC15	+	140	0.615143	0.771734	0.601666	-1.02594
chrVI	149823	149979	YFR002W	NIC96	+	156	1.06022	0.298424	0.710513	-0.20663
chrV	474848	474987	YER154W	OXA1	+	139	1.39392	1.04947	1.37504	0.791612
chrV	242173	242479	YER046W	SPO73	+	306	1.92603	1.43037	1.43869	1.4965
chrV	43098	43204	YEL058W	PCM1	+	106	0.780517	0.399015	0.537249	-0.961481
chrIX	169827	169949	YIL105C	SLM1	-	122	1.5984	0.878044	1.35489	-0.321377
chrIV	1369504	1369642	YDR457W	TOM1	+	138	0.593857	0.730903	0.684803	1.27657
chrIV	693280	693417	YDR120C	TRM1	-	137	1.45023	0.724693	1.13177	0.00920657
chrIV	370963	371145	YDL046W	NPC2	+	182	0.283407	0.582574	0.236639	-0.199644
chrIV	199791	199928	YDL144C	0	-	137	1.36329	1.07805	1.08493	-0.668918
chrIV	164112	164218	YDL166C	FAP7	-	106	0.535575	0.833679	0.943677	-0.757311
chrIV	99357	99477	YDL201W	TRM8	+	120	0.00612333	0.554173	0.517298	-1.05494
chrIII	190356	190531	YCR034W	ELO2	+	175	1.34769	0.803584	0.958485	-0.604699
chrII	741140	741258	YBR268W	MRPL37	+	118	1.77427	1.55246	1.60633	-0.194868
chrII	721194	721306	YBR251W	MRPS5	+	112	1.31673	1.48604	1.43259	1.64264
chrII	623280	623418	YBR201W	DER1	+	138	1.66434	1.4805	1.69813	0.502465
chrII	311512	311730	YBR037C	SCO1	-	218	0.730524	2.36969	2.11774	0.937757
chrII	107523	107629	YBL061C	SKT5	-	106	1.22191	0.524135	0.758208	0.390988
chrII	96175	96322	YBL067C	UBP13	-	147	0.93168	0.51023	0.881329	-0.0614034
chrII	69587	69694	YBL084C	CDC27	-	107	1.16022	0.258892	0.892214	-0.465995
chrXVI	767547	767689	YPR118W	MRI1	+	142	1.54203	0.991898	1.34542	0.0844408
chrXVI	261226	261364	YPL154C	PEP4	-	138	1.80383	1.06567	1.37249	-0.0493333
chrXVI	211939	212086	YPL178W	CBC2	+	147	-0.26313	1.31513	0.974903	-0.0363789
chrXVI	187858	188031	YPL190C	NAB3	-	173	1.87411	1.42278	1.7409	1.31364
chrXV	848288	848408	YOR284W	HUA2	+	120	-0.613922	0.774992	0.65045	-0.03055
chrXV	672465	672592	YOR179C	SYC1	-	127	0.762193	0.833304	1.13518	-0.104305
chrXV	628025	628144	YOR155C	ISN1	-	119	0.608369	0.249603	0.551732	1.26778
chrXV	611828	611941	YOR150W	MRPL23	+	113	1.08317	0.749141	0.767679	-0.261777
chrXV	550313	550431	YOR119C	RIO1	-	118	2.71326	2.01469	2.31454	0.609559
chrXV	373514	373660	YOR021C	SFM1	-	146	1.6823	1.42039	1.59279	3.55914
chrXV	198786	198894	YOL069W	NUF2	+	108	0.641593	0.416281	0.438676	-0.887574
chrXV	142626	142744	YOL094C	RFC4	-	118	0.4219	0.956395	1.38771	0.0608475
chrXIV	711455	711574	YNR048W	0	+	119	0.457277	0.664887	0.723333	0.867445
chrXIV	670234	670339	YNR022C	MRPL50	-	105	0.924788	0.686541	0.769882	-1.48846
chrXIV	640218	640326	YNR008W	LRO1	+	108	0.659869	0.667093	0.832374	0.512693
chrXIV	636791	636934	YNR006W	VPS27	+	143	1.27379	0.836267	1.06455	-0.157315
chrXIV	326513	326635	YNL164C	IBD2	-	122	0.843084	0.803897	0.806357	-0.050827
chrXIV	198130	198344	YNL241C	ZWF1	-	214	3.03918	1.89904	2.29962	1.31726
chrXIII	872698	872949	YMR302C	YME2	-	251	2.97416	2.44056	2.19683	-0.314288
chrXIII	731242	731368	YMR229C	RRP5	-	126	1.66688	1.03463	1.24975	-0.0203937
chrXIII	671394	671501	YMR204C	INP1	-	107	-1.18297	0.0826318	-0.245693	0.537757
chrXIII	659266	659438	YMR197C	VTI1	-	172	1.34648	1.30504	1.20577	-0.0985593
chrXIII	347002	347162	YMR037C	MSN2	-	160	1.33702	1.04367	1.37272	1.49413
chrXIII	337594	337734	YMR033W	ARP9	+	140	0.646989	0.746373	0.620409	1.80157
chrXIII	214003	214125	YML031W	NDC1	+	122	1.73003	1.17545	1.24842	-0.595511
chrXIII	205477	205582	YML037C	0	-	105	0.396448	0.61847	0.545732	-0.414321
chrXIII	99473	99620	YML085C	TUB1	-	147	1.53358	1.16077	1.75504	0.400663
chrXII	914943	915059	YLR397C	AFG2	-	116	0.778121	0.270266	0.529914	1.04749
chrXII	489445	489552	YLR162W	0	+	107	3.63672	2.83822	2.84566	1.9968
chrXII	384592	384702	YLR117C	CLF1	-	110	0.64104	0.668502	0.608998	-0.0971127
chrXII	222203	222308	YLR036C	0	-	105	1.3749	0.793382	1.01844	0.715206
chrXI	556345	556450	YKR060W	UTP30	+	105	-0.605848	1.08467	0.837071	-0.122552
chrXI	475968	476073	YKR018C	0	-	105	0.757826	0.793215	0.959402	-0.941833
chrXI	442809	442960	YKR001C	VPS1	-	151	1.52984	0.697048	1.2703	-0.235116
chrXI	437553	437658	YKL003C	MRP17	-	105	0.986362	0.597053	0.923722	0.0932543
chrXI	418089	418203	YKL013C	ARC19	-	114	1.33481	0.937335	0.897577	-0.853097
chrXI	339535	339672	YKL053C-A	MDM35	-	137	1.15108	0.794847	1.09411	0.681464
chrXI	282412	282517	YKL082C	RRP14	-	105	1.49967	0.89499	1.45627	-0.20257
chrXI	171613	171718	YKL146W	AVT3	+	105	1.28488	0.578394	0.99909	-0.0939657
chrXI	63563	63701	YKL203C	TOR2	-	138	0.533872	0.55912	0.520951	1.00998
chrX	678736	678841	YJR136C	TTI2	-	105	-0.167669	0.82668	0.460071	-0.332742
chrX	434726	434835	YJL002C	OST1	-	109	1.6995	1.09427	1.42412	-0.29467
chrX	207622	207800	YJL111W	CCT7	+	178	0.958551	0.687464	0.548713	0.128463
chrX	186746	186870	YJL125C	GCD14	-	124	-0.0989806	0.728374	0.973932	0.837997
chrX	120022	120258	YJL159W	HSP150	+	236	2.35892	1.6141	1.66306	1.93429
chrVIII	516523	516639	YHR207C	SET5	-	116	0.279361	0.871664	0.575767	-1.31314
chrVIII	332109	332242	YHR110W	ERP5	+	133	1.34525	0.942861	1.30973	0.838683
chrVIII	249719	249825	YHR075C	PPE1	-	106	0.871199	0.730108	0.870222	0.546463
chrVIII	180096	180205	YHR036W	BRL1	+	109	1.13571	0.963917	1.2017	0.205312
chrVIII	131514	131619	YHR013C	ARD1	-	105	1.74949	1.05864	1.54513	1.21645
chrVII	1046596	1046701	YGR278W	CWC22	+	105	0.63458	0.773567	0.948384	0.337876
chrVII	910290	910395	YGR206W	MVB12	+	105	-0.0967667	0.465924	0.218243	0.774848
chrVII	880030	880170	YGR191W	HIP1	+	140	1.52389	0.8379	1.06478	0.73675
chrVII	843646	843768	YGR172C	YIP1	-	122	1.28173	0.808062	1.15583	-0.567339
chrVII	699871	700061	YGR106C	VOA1	-	190	1.71972	1.7108	1.4637	-0.149828
chrVII	617871	618011	YGR063C	SPT4	-	140	0.994792	0.979714	0.986759	-0.840614
chrVII	490599	490704	YGL005C	COG7	-	105	0.688242	0.423059	0.407114	-0.0475133
chrVII	393739	393897	YGL058W	RAD6	+	158	1.94749	1.33192	1.57885	0.592061
chrVII	249627	249802	YGL137W	SEC27	+	175	1.38779	1.0863	1.12129	-0.0481617
chrVII	124287	124455	YGL197W	MDS3	+	168	2.25694	1.55645	2.12674	-0.204139
chrV	536102	536225	YER172C	BRR2	-	123	-0.283602	0.492715	0.0302919	0.961276
chrV	437869	437977	YER134C	0	-	108	0.936645	0.597945	0.664856	-0.0446731
chrV	414277	414428	YER126C	NSA2	-	151	1.81087	1.17546	1.45497	-0.11767
chrV	237218	237398	YER043C	SAH1	-	180	2.92353	1.82005	2.18419	-0.131241
chrV	58178	58301	YEL051W	VMA8	+	123	1.11739	0.759406	1.05175	0.565311
chrV	39681	39836	YEL061C	CIN8	-	155	0.945864	0.483151	0.498035	-0.775358
chrIX	406020	406125	YIR026C	YVH1	-	105	0.638752	0.628571	0.92179	-0.924876
chrIX	378297	378432	YIR012W	SQT1	+	135	1.68948	0.741124	0.90271	-0.891238
chrIX	350117	350256	YIL002W-A	0	+	139	1.2843	0.5674	1.00379	-0.247551
chrIX	267939	268150	YIL046W-A	0	+	211	1.91964	1.30359	1.333	0.041719
chrIX	231172	231282	YIL070C	MAM33	-	110	1.15251	0.93164	0.913418	0.512627
chrIX	222644	222818	YIL074C	SER33	-	174	1.88951	1.45122	1.58853	0.722316
chrIX	89761	89891	YIL138C	TPM2	-	130	-0.584304	0.731688	0.528574	0.0577831
chrIV	1258509	1258617	YDR392W	SPT3	+	108	1.15376	0.746652	0.915137	-0.397834
chrIV	1243007	1243137	YDR385W	EFT2	+	130	1.52539	1.15024	1.28773	1.57851
chrIV	614078	614183	YDR084C	TVP23	-	105	1.13978	0.843036	1.10079	0.16499
chrIV	497461	497605	YDR027C	VPS54	-	144	0.698069	0.197731	0.275312	0.879179
chrIV	489244	489449	YDR023W	SES1	+	205	1.34157	1.0991	1.06035	0.115591
chrIV	68792	68936	YDL217C	TIM22	-	144	0.680301	0.278518	0.447661	0.560928
chrIV	42384	42628	YDL231C	BRE4	-	244	2.24898	2.8655	2.68988	-0.308898
chrIII	58785	58949	YCL036W	GFD2	+	164	2.29002	1.61671	1.92197	-0.957934
chrIII	46961	47109	YCL045C	EMC1	-	148	0.950086	0.684473	0.740389	-0.674636
chrII	615901	616024	YBR197C	0	-	123	1.74693	0.930794	1.58067	-0.340376
chrII	398325	398490	YBR079C	RPG1	-	165	0.997627	0.215233	0.934991	-0.351661
chrII	339442	339565	YBR052C	RFS1	-	123	1.33388	1.15291	1.196	0.0954699
chrII	101237	101433	YBL064C	PRX1	-	196	3.02432	2.11696	2.52061	-0.618355
chrII	75042	75168	YBL079W	NUP170	+	126	0.587792	0.188537	0.158832	-0.886735
chrII	17985	18126	YBL105C	PKC1	-	141	1.8035	0.890059	1.41016	-0.467161
chrI	110478	110588	YAL022C	FUN26	-	110	-0.486007	-0.00332909	-0.257625	-1.36509
chrXVI	821483	821710	snR45	SNR45	+	227	1.40397	1.68204	1.92128	1.07521
chrXVI	656623	656738	YPR045C	THP3	-	115	1.12416	0.767461	0.67302	-1.07465
chrXVI	506468	506592	YPL022W	RAD1	+	124	1.36796	0.999132	1.10318	0.0584839
chrXVI	493338	493464	YPL030W	TRM44	+	126	1.11697	0.987329	0.94537	-0.338968
chrXVI	415558	415705	YPL074W	YTA6	+	147	1.19167	0.706565	0.948204	0.141767
chrXVI	328939	329347	YPL117C	IDI1	-	408	0.0566664	1.67077	1.68659	0.756246
chrXVI	198885	198989	YPL183W-A	RTC6	+	104	1.16136	0.779965	1.06982	-0.372571
chrXV	842221	842381	snR5	SNR5	+	160	2.07472	1.38829	1.94196	0.191632
chrXV	738125	738252	YOR210W	RPB10	+	127	1.51138	0.85677	1.03227	-0.85496
chrXV	533834	533948	YOR113W	AZF1	+	114	1.32133	0.74876	0.989109	-0.522898
chrXV	415978	416089	YOR046C	DBP5	-	111	0.589286	0.770285	0.817539	2.54596
chrXV	238432	238542	YOL049W	GSH2	+	110	0.731438	0.502049	0.726195	-0.185527
chrXIV	694858	694962	YNR036C	MRPS12	-	104	1.01386	1.26277	1.21729	-0.852006
chrXIV	627203	627379	YNL002C	RLP7	-	176	1.09466	0.908484	1.05733	1.90909
chrXIV	581748	581878	YNL026W	SAM50	+	130	-0.170922	0.548758	0.498643	-0.9051
chrXIV	514988	515110	YNL059C	ARP5	-	122	0.720995	0.651113	0.546677	-0.65618
chrXIV	490146	490269	YNL072W	RNH201	+	123	0.934707	0.787333	0.710841	-0.939541
chrXIV	473195	473317	YNL082W	PMS1	+	122	0.379914	0.925202	0.699732	1.50135
chrXIV	394453	394628	YNL123W	NMA111	+	175	-1.17387	0.296923	0.439858	-1.03252
chrXIV	387020	387140	YNL126W	SPC98	+	120	0.916483	0.504833	0.851625	0.785158
chrXIV	224523	224652	YNL225C	CNM67	-	129	1.11341	0.916354	1.00478	-0.0399566
chrXIV	164419	164535	YNL257C	SIP3	-	116	0.931964	0.959595	0.956957	0.121551
chrXIII	820004	820125	YMR277W	FCP1	+	121	0.928302	0.568007	0.855477	-0.580377
chrXIII	815367	815471	YMR274C	RCE1	-	104	-1.20099	0.266515	0.333487	-1.17812
chrXIII	522043	522147	YMR126C	DLT1	-	104	1.13545	0.751309	0.929178	0.800188
chrXIII	480258	480362	YMR106C	YKU80	-	104	1.3042	0.764371	0.89544	1.23918
chrXIII	406136	406261	YMR068W	AVO2	+	125	1.7803	1.28073	1.42928	-0.229743
chrXIII	104233	104337	YML081C-A	ATP18	-	104	1.41247	1.21078	1.02915	0.176733
chrXII	877417	877600	YLR378C	SEC61	-	183	2.16123	1.68045	1.83981	-0.148745
chrXII	719523	719627	YLR291C	GCD7	-	104	1.00501	0.745572	0.922821	-0.467085
chrXII	668984	669114	YLR262C	YPT6	-	130	1.4086	0.938185	1.15117	2.13916
chrXII	468911	469036	YLR154C-H	0	-	125	2.98909	1.95446	2.58329	2.00496
chrXII	225273	225410	YLR038C	COX12	-	137	1.3399	0.90372	1.22809	-0.195395
chrXII	184963	185068	YLR022C	SDO1	-	105	-0.82869	0.79361	0.827099	0.346015
chrXII	157795	157917	YLR003C	CMS1	-	122	0.989606	0.793832	0.857903	-0.0954754
chrXII	131483	131654	YLL009C	COX17	-	171	0.984398	0.899063	0.819194	0.536198
chrXI	604276	604386	YKR087C	OMA1	-	110	0.960258	0.649005	0.886709	-0.0374891
chrXI	361897	362018	YKL040C	NFU1	-	121	1.36009	1.16024	0.986456	-0.720251
chrXI	338896	339094	YKL054C	DEF1	-	198	2.71888	2.61734	2.39268	0.515125
chrXI	99624	100098	YKL182W	FAS1	+	474	2.7475	2.13894	2.01484	1.2173
chrX	436611	436721	YJR001W	AVT1	+	110	1.30459	0.66452	0.769528	-0.725815
chrX	143032	143136	YJL146W	IDS2	+	104	1.16085	1.07459	1.35112	-0.654042
chrVIII	501183	501287	YHR201C	PPX1	-	104	0.48142	0.655407	0.824546	0.236647
chrVIII	273652	273834	YHR084W	STE12	+	182	1.60978	1.19683	1.34969	0.594988
chrVIII	75062	75347	YHL016C	DUR3	-	285	2.97939	2.44697	2.85447	2.32022
chrVII	892271	892422	YGR196C	FYV8	-	151	0.959105	0.815175	0.864479	0.770128
chrVII	753991	754137	YGR131W	FHN1	+	146	1.82884	1.30535	1.6398	0.221058
chrVII	698438	698542	YGR105W	VMA21	+	104	0.69744	1.14814	0.93424	-1.78775
chrVII	639576	639680	YGR077C	PEX8	-	104	0.919988	0.9674	1.21457	-0.59185
chrVII	310621	310899	YGL103W	RPL28	+	278	3.45005	2.3125	2.52001	1.63317
chrVII	140230	140352	YGL194C-A	0	-	122	0.14401	0.276157	0.310546	-0.764757
chrVI	155938	156106	YFR006W	0	+	168	1.76845	0.96189	1.28745	0.224154
chrVI	104507	104611	YFL017C	GNA1	-	104	0.455355	0.676169	0.33808	-1.47324
chrV	318583	318687	YER078C	ICP55	-	104	1.30103	1.25666	1.39401	-0.0231788
chrIX	348553	348657	YIL004C	BET1	-	104	0.957007	0.588113	0.732528	-1.01508
chrIX	290139	290243	YIL034C	CAP2	-	104	-0.157589	0.556374	0.559939	-1.34452
chrIX	237837	237951	YIL067C	0	-	114	-0.680915	0.64679	0.629122	-0.974332
chrIV	1473082	1473192	YDR515W	SLF1	+	110	1.07041	0.481225	0.908744	0.367831
chrIV	1405933	1406037	YDR473C	PRP3	-	104	1.07248	0.827241	0.981553	0.368174
chrIV	1130846	1130950	YDR332W	IRC3	+	104	-0.199279	0.466698	0.503863	-0.63566
chrIV	664980	665084	YDR104C	SPO71	-	104	0.463583	0.443733	0.739283	-0.142856
chrIV	596839	596953	YDR075W	PPH3	+	114	0.468103	0.535558	0.37	-1.10374
chrIV	439396	439551	YDL006W	PTC1	+	155	1.06508	0.834029	1.00207	0.735362
chrIV	283231	283335	YDL100C	GET3	-	104	0.964653	0.490912	0.884696	-0.611862
chrIV	272228	272332	YDL105W	NSE4	+	104	1.09524	1.14007	1.01868	0.8232
chrIV	98186	98403	YDL202W	MRPL11	+	217	1.01056	2.30631	1.88953	0.0482512
chrII	770629	770825	YBR283C	SSH1	-	196	3.01117	2.55774	2.58427	0.184776
chrII	736102	736206	YBR263W	SHM1	+	104	0.938377	0.870471	0.953713	-1.01596
chrII	683158	683281	YBR231C	SWC5	-	123	1.59503	1.36702	1.72326	-0.0811268
chrII	586246	586501	YBR177C	EHT1	-	255	2.40162	1.89139	2.09632	0.358024
chrII	296097	296231	YBR028C	YPK3	-	134	-1.32269	0.479152	-0.368899	0.0424604
chrII	217182	217314	YBL006C	LDB7	-	132	2.62074	2.03453	2.50004	0.349694
chrI	61106	61257	YAL042W	ERV46	+	151	1.60601	1.26342	1.03771	-0.866168
chrI	58503	58627	YAL044C	GCV3	-	124	0.518014	0.179297	0.318367	-0.273557
chrXVI	639337	639457	YPR034W	ARP7	+	120	1.69752	1.1979	1.46459	0.320719
chrXVI	427767	427870	YPL065W	VPS28	+	103	1.41637	0.889783	1.26853	0.801754
chrXVI	408840	409011	YPL078C	ATP4	-	171	1.71365	1.23942	1.40756	-0.438401
chrXVI	281625	282044	YPL143W	RPL33A	+	419	2.81097	2.24612	2.41945	5.68152
chrXVI	280275	280420	YPL144W	POC4	+	145	1.62723	1.22084	1.35946	0.77541
chrXVI	277596	277757	YPL146C	NOP53	-	161	1.74293	1.21084	1.17752	2.28969
chrXV	850110	850230	YOR286W	RDL2	+	120	1.35027	0.772792	1.07646	0.120533
chrXV	375886	375989	YOR022C	0	-	103	0.381157	0.517011	0.737913	-1.24956
chrXV	265198	265323	YOL032W	OPI10	+	125	-0.326612	0.575379	0.451489	1.2637
chrXV	181500	181621	YOL080C	REX4	-	121	1.78824	1.11149	1.26001	-0.670002
chrXV	47653	47771	YOL148C	SPT20	-	118	1.05348	0.743319	0.86229	-0.171308
chrXIV	672267	672370	YNR024W	MPP6	+	103	1.17138	0.629981	0.786882	-0.600989
chrXIV	510285	510459	YNL062C	GCD10	-	174	1.31603	0.683958	0.662733	-0.517689
chrXIV	372275	372435	YNL135C	FPR1	-	160	1.95896	1.51103	1.68538	0.449078
chrXIV	297715	297832	YNL182C	IPI3	-	117	1.39311	0.722346	1.14594	-0.0725239
chrXIV	185267	185412	YNL246W	VPS75	+	145	0.687169	0.392568	0.743734	-0.961394
chrXIII	696557	696708	YMR215W	GAS3	+	151	1.09538	0.815078	1.26079	-0.716137
chrXIII	387076	387193	YMR055C	BUB2	-	117	1.31815	0.741194	1.16147	0.986562
chrXIII	243083	243186	YML015C	TAF11	-	103	0.987104	0.750072	0.81502	-0.981969
chrXIII	233296	233411	YML019W	OST6	+	115	0.633689	0.780308	0.585083	-0.386813
chrXIII	225646	225835	YML024W	RPS17A	+	189	2.67606	2.02102	2.0887	6.56965
chrXIII	51430	51547	YML109W	ZDS2	+	117	1.01794	0.71392	1.04374	0.174995
chrXII	805185	805316	YLR337C	VRP1	-	131	1.06124	0.407834	0.746619	0.229518
chrXII	363898	364040	YLR106C	MDN1	-	142	-0.528256	0.488431	0.535293	1.8531
chrXII	194242	194354	YLR025W	SNF7	+	112	1.27027	0.917843	0.902814	-0.720441
chrXI	605461	605579	YKR088C	TVP38	-	118	0.419618	0.184605	0.201081	-0.12248
chrXI	487451	487707	YKR025W	RPC37	+	256	0.581421	2.69855	2.40142	-0.847814
chrXI	403950	404053	YKL018W	SWD2	+	103	0.782531	0.524039	0.848423	-1.47277
chrXI	134177	134313	YKL167C	MRP49	-	136	1.13207	0.986671	0.799169	0.56782
chrX	383621	383783	YJL033W	HCA4	+	162	1.09939	0.877636	0.99273	4.64151
chrX	345784	345911	YJL049W	0	+	127	0.296717	0.234677	0.278994	0.257827
chrX	319817	319951	YJL061W	NUP82	+	134	0.974249	0.790988	0.793623	-0.785563
chrX	140149	140349	YJL148W	RPA34	+	200	2.4884	1.72549	1.75114	0.764556
chrX	109650	109753	YJL165C	HAL5	-	103	1.52938	1.04463	1.26789	-0.371583
chrX	104548	104651	YJL168C	SET2	-	103	1.19759	0.894871	0.581951	-0.696683
chrX	11342	11452	YJL222W	VTH2	+	110	0.650789	0.187591	0.599038	-1.42503
chrVIII	497302	497413	YHR198C	AIM18	-	111	0.920324	0.512423	0.775733	-0.560937
chrVIII	345667	345770	YHR119W	SET1	+	103	1.00517	0.787684	0.949596	-0.935101
chrVIII	261873	262010	YHR079C	IRE1	-	137	1.17109	1.02742	0.997769	1.13351
chrVIII	108492	108641	YHR002W	LEU5	+	149	1.35653	0.951332	1.10909	-0.0555174
chrVII	836752	837048	YGR169C-A	LSO2	-	296	2.50987	2.48988	2.31444	-0.595307
chrVII	141808	141911	YGL194C	HOS2	-	103	0.881677	0.36659	0.576038	0.486598
chrVII	36760	36899	YGL247W	BRR6	+	139	0.715782	0.258253	0.551922	-0.0812137
chrVII	35384	35487	YGL248W	PDE1	+	103	1.22914	1.09576	1.13298	0.91121
chrVI	252304	252448	YFR052W	RPN12	+	144	1.52354	1.00844	0.805817	-0.545326
chrVI	16515	16636	YFL056C	AAD6	-	121	0.749865	0.309093	0.752774	0.723683
chrV	467560	467672	YER149C	PEA2	-	112	1.70104	1.26226	1.2922	-0.135929
chrV	326015	326170	YER082C	UTP7	-	155	0.802813	1.1735	1.42573	-0.761448
chrV	238164	238303	YER044C	ERG28	-	139	1.83773	1.27017	1.51753	1.76067
chrV	159172	159295	YER003C	PMI40	-	123	1.62314	1.18508	1.51614	0.0326317
chrV	68972	69407	YEL044W	IES6	+	435	2.80179	1.83963	2.10964	0.681791
chrV	31307	31415	YEL064C	AVT2	-	108	0.864294	0.595816	0.959471	0.660393
chrIX	244518	244653	YIL062C	ARC15	-	135	1.76337	1.23569	1.58622	-0.519252
chrIX	220782	220925	YIL075C	RPN2	-	143	1.45473	0.739981	0.77424	-0.223522
chrIX	193263	193406	YIL090W	ICE2	+	143	1.57582	0.959398	1.29335	0.182045
chrIX	11349	11469	YIL173W	VTH1	+	120	0.428801	0.20651	0.562203	-1.66678
chrIV	1428158	1428261	YDR486C	VPS60	-	103	0.468283	0.644332	0.789891	-0.738658
chrIV	1226591	1226702	YDR375C	BCS1	-	111	1.08141	0.787105	0.688054	0.000393692
chrIV	1198859	1198975	YDR363W	ESC2	+	116	2.70837	1.14409	1.51628	0.292827
chrIV	1125140	1125282	YDR326C	YSP2	-	142	0.934845	0.505755	0.425869	-0.443276
chrIV	1072627	1072740	YDR304C	CPR5	-	113	0.602722	0.748637	0.740953	-0.29699
chrIV	1002259	1002409	YDR266C	HEL2	-	150	0.932273	0.569922	0.790624	0.735536
chrIV	838171	838322	YDR189W	SLY1	+	151	1.21002	0.66943	1.16434	0.352999
chrIV	685713	685820	YDR117C	TMA64	-	107	1.03894	0.885522	0.887087	0.0371589
chrIV	575897	576056	YDR062W	LCB2	+	159	1.86364	1.46339	1.56541	0.710381
chrIV	478815	478948	YDR016C	DAD1	-	133	1.24162	0.842099	1.15376	0.0649624
chrIV	432095	432262	YDL010W	GRX6	+	167	2.48754	1.93957	2.43588	0.415598
chrIV	392352	392455	YDL035C	GPR1	-	103	0.876583	0.720156	0.8876	0.079465
chrIV	376550	376661	YDL043C	PRP11	-	111	0.296523	0.741084	0.806093	0.270522
chrIV	321715	321904	YDL076C	RXT3	-	189	2.77018	2.02295	2.28738	5.02556
chrIV	198482	198608	YDL145C	COP1	-	126	1.35444	1.30383	1.10844	-1.04971
chrIV	183082	183206	YDL153C	SAS10	-	124	1.63597	1.096	1.48903	0.432684
chrIV	121812	121946	YDL189W	RBS1	+	134	1.07412	0.729843	0.682645	-0.235863
chrIII	142568	142699	snR33	SNR33	-	131	1.99406	1.31603	1.36417	-1.10927
chrIII	127782	127990	YCR008W	SAT4	+	208	2.99242	1.90534	2.32487	0.105963
chrII	728707	728823	YBR257W	POP4	+	116	2.07802	1.43422	1.68976	0.183628
chrII	634911	635047	YBR207W	FTH1	+	136	1.00604	0.56684	1.0226	0.113385
chrII	600015	600123	YBR185C	MBA1	-	108	1.27838	0.849256	1.18474	-0.326126
chrII	568575	568720	YBR164C	ARL1	-	145	1.00343	0.781421	0.779869	2.62778
chrII	227340	227503	YBL004W	UTP20	+	163	1.69091	0.787855	1.13845	1.5665
chrII	171293	171398	YBL025W	RRN10	+	105	1.0376	1.11407	1.31884	-0.00830667
chrII	124854	125012	YBL051C	PIN4	-	158	1.82291	1.22111	1.28776	-0.39823
chrI	130534	130678	YAL012W	CYS3	+	144	1.19809	0.495111	0.463044	-0.607233
chrXVI	355465	355599	YPL105C	SYH1	-	134	0.994296	0.799171	0.815047	-0.527285
chrXV	900001	900174	YOR311C	DGK1	-	173	0.882321	0.406223	0.535268	0.847218
chrXV	755137	755266	YOR220W	RCN2	+	129	1.64106	1.17018	1.56164	0.60539
chrXV	749076	749178	YOR217W	RFC1	+	102	0.917563	0.584316	0.998392	-0.524949
chrXV	716900	717041	YOR196C	LIP5	-	141	1.12222	0.747756	0.688301	-1.3134
chrXV	486995	487130	YOR086C	TCB1	-	135	1.9329	1.33846	1.43329	0.293052
chrXV	417860	418112	YOR047C	STD1	-	252	2.29028	1.72485	1.85441	0.449392
chrXV	15595	15697	YOL159C-A	0	-	102	0.930988	0.794671	0.899579	0.0367147
chrXIV	743647	743762	YNR061C	0	-	115	0.453608	0.94409	1.06175	-1.54571
chrXIV	556857	556988	YNL038W	GPI15	+	131	0.676766	0.749525	0.893747	2.30034
chrXIV	554853	554988	YNL039W	BDP1	+	135	1.08792	0.929585	0.949901	-0.694304
chrXIV	300881	300983	YNL180C	RHO5	-	102	1.10356	0.93013	0.781366	0.320917
chrXIV	247221	247350	YNL213C	RRG9	-	129	0.999091	0.664051	0.576506	-0.00460853
chrXIII	740057	740159	YMR234W	RNH1	+	102	-0.297227	0.811201	0.786717	-0.468848
chrXIII	721453	721560	YMR225C	MRPL44	-	107	0.989648	0.925418	1.00052	0.182766
chrXIII	674869	675000	YMR205C	PFK2	-	131	-0.323829	1.04956	0.7991	1.24076
chrXIII	646908	647019	YMR192W	GYL1	+	111	0.211166	0.845181	0.927075	-0.520682
chrXIII	56300	56438	YML107C	PML39	-	138	0.247481	0.862209	0.857797	0.287358
chrXIII	51028	51163	YML110C	COQ5	-	135	1.12078	0.768084	0.954308	-0.389873
chrXII	885077	885179	YLR383W	SMC6	+	102	-0.521598	0.539714	0.783168	-0.0491647
chrXII	845886	846001	YLR360W	VPS38	+	115	-1.08314	0.777418	0.159788	0.811072
chrXII	548837	548939	YLR200W	YKE2	+	102	1.2031	1.03287	1.1505	0.0236255
chrXII	447675	447919	YLR153C	ACS2	-	244	2.34832	1.64989	1.84404	-0.0721701
chrXII	315942	316044	YLR087C	CSF1	-	102	0.559986	0.418929	0.359673	-0.405004
chrXII	140929	141043	YLL004W	ORC3	+	114	0.36061	0.176347	0.483068	0.298525
chrXI	589872	590211	YKR080W	MTD1	+	339	2.55389	1.75244	1.77406	-0.491494
chrXI	526693	526812	YKR048C	NAP1	-	119	0.651277	0.375389	0.531941	-0.990585
chrXI	330000	330104	YKL058W	TOA2	+	104	1.38864	0.848373	0.842958	0.588492
chrXI	294434	294575	YKL075C	0	-	141	0.462409	0.324914	0.558601	0.0696348
chrXI	223120	223222	YKL116C	PRR1	-	102	1.06561	0.661251	0.912296	0.902051
chrXI	195061	195163	YKL132C	RMA1	-	102	1.76463	1.10221	1.57281	0.397825
chrXI	106949	107088	YKL181W	PRS1	+	139	1.01688	0.164917	0.0396245	0.800141
chrX	672775	672879	YJR133W	XPT1	+	104	0.674967	0.242068	0.447871	1.79258
chrX	641796	641959	YJR117W	STE24	+	163	1.04876	0.994803	1.22523	0.307475
chrX	445698	445830	YJR004C	SAG1	-	132	1.50164	0.90407	1.40725	0.030947
chrX	421721	421869	YJL008C	CCT8	-	148	1.54304	1.21926	1.51453	0.0658791
chrX	413465	413576	YJL012C	VTC4	-	111	1.84939	1.38426	1.61121	0.803352
chrX	196037	196187	YJL115W	ASF1	+	150	1.45089	0.920043	1.14099	0.859585
chrX	180358	180498	YJL128C	PBS2	-	140	1.55866	1.06506	1.43487	1.38528
chrX	94841	94943	YJL174W	KRE9	+	102	1.42531	0.752815	0.799944	-0.955128
chrX	36537	36690	YJL210W	PEX2	+	153	2.68842	1.97552	2.42654	1.55067
chrVIII	267066	267189	YHR080C	0	-	123	1.86271	1.24638	1.44541	1.27778
chrVIII	218876	218978	YHR057C	CPR2	-	102	1.09416	1.0637	1.16284	-0.700045
chrVII	932055	932225	YGR218W	CRM1	+	170	0.441356	0.783715	0.686447	1.42621
chrVII	866169	866309	YGR184C	UBR1	-	140	1.16601	0.574659	0.751123	-0.406046
chrVII	830310	830412	YGR166W	TRS65	+	102	1.45595	0.949902	1.33108	-0.345202
chrVII	450009	450117	YGL025C	PGD1	-	108	1.00214	0.430121	0.735162	-1.57841
chrVII	446191	446293	YGL027C	CWH41	-	102	0.624432	0.396107	0.497055	0.575485
chrVII	443423	443554	YGL028C	SCW11	-	131	2.24587	1.36409	1.68155	0.112223
chrVII	352371	352487	YGL084C	GUP1	-	116	1.41237	0.75676	0.946459	0.390872
chrVII	284021	284123	YGL120C	PRP43	-	102	1.57235	0.994661	1.30029	0.318853
chrVII	98704	98856	YGL207W	SPT16	+	152	1.73574	1.1842	1.3081	0.689595
chrVII	64366	64468	YGL230C	0	-	102	-1.04016	0.808286	0.922649	0.613604
chrVI	207266	207368	YFR027W	ECO1	+	102	1.46338	0.812886	1.27885	-0.10968
chrV	121337	121439	YEL018W	EAF5	+	102	0.947027	0.405911	0.769034	0.645242
chrV	82804	82948	YEL037C	RAD23	-	144	1.79148	1.4606	1.63672	0.397967
chrIX	314926	315039	YIL020C	HIS6	-	113	0.978837	0.48379	0.733946	0.0108673
chrIX	312653	312796	YIL021W	RPB3	+	143	1.47027	0.736927	0.954537	0.807759
chrIX	304181	304283	YIL027C	EMC5	-	102	1.54777	0.917318	1.24086	0.0558098
chrIX	151425	151541	YIL112W	HOS4	+	116	0.734159	0.55123	0.734914	-0.395764
chrIX	73683	73785	YIL147C	SLN1	-	102	1.37688	0.861996	1.14477	-0.155093
chrIV	1196328	1196487	YDR361C	BCP1	-	159	0.508011	0.26874	0.595287	1.24176
chrIV	1059424	1059554	YDR299W	BFR2	+	130	1.935	1.61885	1.6311	1.09387
chrIV	746266	746405	YDR144C	MKC7	-	139	1.77392	1.12071	1.37112	0.251091
chrIV	602920	603022	YDR079W	PET100	+	102	0.846084	0.806529	0.789033	1.47818
chrIV	378527	378678	YDL042C	SIR2	-	151	1.58633	0.877567	1.40473	0.285235
chrIV	372045	372181	YDL045W-A	MRP10	+	136	1.38009	0.969315	1.00417	0.357858
chrIV	242117	242290	YDL122W	UBP1	+	173	0.497008	1.04498	0.669835	0.980072
chrIV	52231	52369	YDL225W	SHS1	+	138	1.66859	0.833412	1.28557	-0.939611
chrIII	289328	289476	YCR095C	OCA4	-	148	0.631586	0.473222	0.579214	0.277311
chrIII	264895	265006	YCR088W	ABP1	+	111	1.29531	0.618195	0.954368	-0.0678946
chrIII	176537	176671	YCR030C	SYP1	-	134	1.00783	0.980375	1.0832	1.38055
chrIII	143450	143581	YCR016W	0	+	131	1.30005	0.536922	0.753034	1.29292
chrII	749419	749521	YBR273C	UBX7	-	102	1.0747	1.09011	1.20767	-1.00753
chrII	670344	670446	YBR225W	0	+	102	1.43921	1.03346	1.2402	-0.127667
chrII	666504	666643	YBR221C	PDB1	-	139	1.76414	1.00134	1.63137	0.278812
chrII	578164	578302	YBR171W	SEC66	+	138	0.940646	-0.020658	0.418974	0.326143
chrII	423368	423500	YBR086C	IST2	-	132	0.93962	1.09894	1.47464	2.70427
chrII	111246	111382	YBL058W	SHP1	+	136	0.796722	0.747687	0.687772	-0.221403
chrI	154794	154910	YAR003W	SWD1	+	116	0.815984	0.572162	0.820748	-0.379974
chrXVI	911062	911199	YPR187W	RPO26	+	137	1.42406	0.995245	1.12272	-0.713579
chrXVI	833507	833608	YPR152C	URN1	-	101	1.06508	0.719275	1.07122	-0.749138
chrXVI	251806	251989	YPL159C	PET20	-	183	1.86842	1.39449	1.30967	0.239274
chrXV	996984	997094	YOR352W	TFB6	+	110	0.765573	0.402542	0.700656	0.116093
chrXV	759563	759729	YOR223W	DSC3	+	166	0.875255	1.30227	1.34229	-1.53831
chrXV	616973	617139	YOR151C	RPB2	-	166	1.72974	1.46764	1.29032	1.04808
chrXV	584101	584247	YOR137C	SIA1	-	146	1.52036	1.39778	1.65718	0.441088
chrXV	77351	77498	YOL129W	VPS68	+	147	-0.180097	0.584273	0.839334	1.19578
chrXIV	685744	685866	YNR032W	PPG1	+	122	1.52767	1.09488	1.46062	-0.329366
chrXIV	280211	280346	YNL191W	DUG3	+	135	1.27208	0.638903	0.746879	0.199133
chrXIV	263494	263641	YNL201C	PSY2	-	147	0.90669	0.581754	1.05049	0.364295
chrXIV	228911	229034	YNL222W	SSU72	+	123	1.27902	0.930907	1.20226	0.465786
chrXIV	220438	220589	YNL229C	URE2	-	151	2.13821	1.45892	1.691	0.370232
chrXIV	59853	59967	YNL305C	BXI1	-	114	1.63574	0.781862	1.2169	0.801393
chrXIII	845429	845530	YMR288W	HSH155	+	101	0.686492	0.741796	0.941244	-0.806617
chrXIII	835174	835294	YMR282C	AEP2	-	120	0.934058	0.334948	0.858905	0.35609
chrXIII	804284	804385	YMR268C	PRP24	-	101	0.479667	0.473136	0.55097	-0.572914
chrXIII	784359	784460	YMR258C	ROY1	-	101	0.233876	0.408879	0.550537	3.44665
chrXIII	486366	486530	YMR109W	MYO5	+	164	1.18161	0.816271	0.749176	0.266879
chrXIII	355132	355322	YMR044W	IOC4	+	190	0.332274	0.873272	0.427843	1.00099
chrXII	986908	987019	YLR426W	TDA5	+	111	0.763548	1.05093	1.1849	0.150423
chrXII	879543	879663	YLR381W	CTF3	+	120	0.918084	0.817269	1.05161	-1.34368
chrXII	707144	707311	YLR285W	NNT1	+	167	2.04836	1.24654	1.5053	0.116649
chrXII	581819	581937	YLR222C	UTP13	-	118	1.25271	0.551078	0.430725	0.401604
chrXII	517766	517867	YLR181C	VTA1	-	101	0.300277	-0.0134465	0.372053	-1.87609
chrXII	416868	416969	YLR137W	RKM5	+	101	1.16692	1.03296	1.22474	0.179337
chrXII	300420	300604	YLR084C	RAX2	-	184	1.53385	0.999617	0.972402	2.5437
chrXII	270836	270947	YLR067C	PET309	-	111	1.31883	0.527136	0.994822	-0.239126
chrXII	255092	255224	YLR057W	MNL2	+	132	0.529433	0.416353	0.448444	-0.0363
chrXII	247026	247127	YLR052W	IES3	+	101	1.12146	0.717416	1.05616	0.0453475
chrXII	46478	46608	YLL048C	YBT1	-	130	0.953097	0.71504	0.653171	1.23497
chrXI	507751	507890	YKR035W-A	DID2	+	139	0.816951	0.172944	0.430842	0.300158
chrXI	452000	452153	YKR008W	RSC4	+	153	1.34232	0.678301	0.858079	-0.594722
chrXI	393438	393673	YKL023W	0	+	235	1.07038	2.82679	2.45114	-0.391169
chrXI	263177	263303	YKL094W	YJU3	+	126	0.841698	0.412598	0.461029	-0.736643
chrX	461615	461759	YJR014W	TMA22	+	144	1.00734	1.31792	1.2217	0.0102646
chrVIII	512123	512428	YHR206W	SKN7	+	305	3.51142	2.66318	2.62841	-0.176294
chrVIII	483885	483986	YHR189W	PTH1	+	101	1.03805	0.825679	1.02384	-0.846674
chrVIII	167509	167641	YHR028C	DAP2	-	132	1.22916	1.22108	1.14461	0.578329
chrVIII	94690	94794	YHL008C	0	-	104	0.884781	0.384962	0.679223	0.0581481
chrVII	914890	915107	YGR210C	0	-	217	3.02826	2.28689	2.49167	0.318113
chrVII	381348	381452	YGL065C	ALG2	-	104	0.982723	0.705787	0.957854	0.125833
chrVII	131318	131469	YGL195W	GCN1	+	151	1.29281	0.78893	0.933128	0.583158
chrVI	210590	210845	YFR029W	PTR3	+	255	2.56516	1.4769	1.85736	-0.513759
chrV	250527	250628	YER048W-A	ISD11	+	101	1.23337	1.13731	1.14089	0.787755
chrIX	342332	342436	YIL008W	URM1	+	104	1.39995	1.33719	1.53303	0.314817
chrIX	131843	132172	YIL121W	QDR2	+	329	2.91179	2.18037	2.16145	0.211324
chrIV	1443465	1443639	YDR496C	PUF6	-	174	0.430058	0.397422	0.472242	2.38774
chrIV	1386592	1386749	YDR463W	STP1	+	157	2.25898	1.88963	1.98947	-0.228876
chrIV	1383561	1383662	YDR460W	TFB3	+	101	1.16768	0.965695	1.01074	-0.69987
chrIV	1263033	1263181	YDR395W	SXM1	+	148	1.73882	0.852618	1.41781	-0.0817162
chrIV	1249983	1250117	YDR388W	RVS167	+	134	1.4656	0.946874	1.21051	-0.26354
chrIV	979309	979479	YDR261C	EXG2	-	170	2.03082	1.24705	1.70901	0.791662
chrIV	794283	794439	YDR169C	STB3	-	156	1.25353	0.886703	0.748823	0.999243
chrIV	681980	682111	YDR115W	0	+	131	1.32802	1.11544	1.22701	-0.748696
chrIV	486576	486685	YDR021W	FAL1	+	109	1.07118	1.02675	1.01187	1.76151
chrIV	362469	362604	YDL053C	PBP4	-	135	-0.244142	0.940189	0.76327	1.56293
chrIV	281925	282066	YDL101C	DUN1	-	141	-0.0559014	0.399688	0.84727	0.377304
chrIV	172236	172406	YDL160C	DHH1	-	170	1.67591	1.46707	1.52388	0.352302
chrIV	163236	163337	YDL167C	NRP1	-	101	0.483643	0.674295	0.820909	-0.103551
chrIV	114431	114544	YDL193W	NUS1	+	113	1.71935	1.0371	1.134	-0.259023
chrIII	252690	252791	YCR079W	PTC6	+	101	0.390128	0.0777446	0.59597	-1.30256
chrIII	12309	12475	YCL068C	0	-	166	0.88841	0.513233	0.632145	-1.18904
chrII	716585	716726	YBR248C	HIS7	-	141	1.23131	0.844226	1.0852	1.89639
chrII	700121	700241	YBR239C	ERT1	-	120	0.932499	1.41146	1.78215	1.67112
chrII	633457	633558	YBR205W	KTR3	+	101	1.27833	0.78731	1.12404	-0.900078
chrII	549566	549686	YBR155W	CNS1	+	120	1.07484	0.562655	0.840178	0.257803
chrII	484570	484708	YBR122C	MRPL36	-	138	1.0185	0.557688	0.519975	0.349561
chrII	415329	415835	YBR084C-A	RPL19A	-	506	2.73439	1.93377	2.03277	5.2615
chrII	386128	386252	YBR074W	PFF1	+	124	-0.228605	0.439898	0.359466	0.0111516
chrII	145824	146072	YBL039C	URA7	-	248	2.86993	2.68264	2.67097	1.31903
chrI	39045	39192	YAL056W	GPB2	+	147	0.733511	0.562879	0.68094	-0.563303
chrXVI	883649	883750	YPR171W	BSP1	+	101	0.814879	0.952259	0.865163	-0.52427
chrXVI	856970	857262	YPR159W	KRE6	+	292	3.68453	2.63214	2.83902	0.659192
chrXVI	742194	742316	YPR108W	RPN7	+	122	1.043	0.913256	0.915859	-0.277607
chrXVI	739881	739988	YPR106W	ISR1	+	107	1.08465	0.725025	0.585176	-0.289771
chrXVI	736738	736901	YPR104C	FHL1	-	163	1.07261	1.12767	1.1552	1.72944
chrXVI	633904	634045	YPR032W	SRO7	+	141	-2.53561	0.523313	0.232965	-0.362262
chrXVI	603611	603730	YPR021C	AGC1	-	119	0.775619	0.458734	0.939444	0.695792
chrXVI	584148	584248	YPR011C	0	-	100	1.09955	0.68644	0.892996	-0.374934
chrXVI	467029	467129	YPL046C	ELC1	-	100	0.261	0.992698	1.42328	1.48522
chrXVI	202591	202711	YPL183C	RTT10	-	120	1.27134	0.576768	0.905135	0.175368
chrXV	875385	875492	YOR297C	TIM18	-	107	1.04963	0.470587	0.76786	-0.706636
chrXV	817081	817198	YOR261C	RPN8	-	117	1.36094	1.08601	1.057	0.230503
chrXV	692218	692360	YOR191W	ULS1	+	142	0.947718	0.774835	0.842021	-0.030869
chrXV	639252	639352	YOR161C-C	0	-	100	1.44888	1.17875	1.22954	0.820264
chrXV	242800	242978	YOL045W	PSK2	+	178	1.91951	1.22627	1.99919	-0.823678
chrXV	86815	86945	YOL124C	TRM11	-	130	0.968665	0.724935	0.760288	1.06419
chrXIV	694103	694253	YNR035C	ARC35	-	150	1.35575	1.36601	0.968999	-1.18557
chrXIV	653242	653342	YNR015W	SMM1	+	100	1.21058	0.89758	1.00881	-0.832236
chrXIV	647205	647313	YNR012W	URK1	+	108	0.472401	0.441069	0.390805	0.725213
chrXIV	602614	602778	YNL016W	PUB1	+	164	1.13709	1.26364	1.44946	1.49351
chrXIV	237847	237968	YNL219C	ALG9	-	121	1.7048	1.17844	1.46096	-0.00333471
chrXIII	874575	874761	YMR304W	UBP15	+	186	1.88434	1.2246	1.5858	1.23738
chrXIII	732119	732345	YMR230W	RPS10B	+	226	3.40762	2.64012	2.72595	0.2086
chrXII	1030635	1030779	YLR449W	FPR4	+	144	0.541649	0.350293	0.578982	1.23428
chrXII	669723	669823	YLR263W	RED1	+	100	1.18455	0.668233	0.836043	-0.438729
chrXII	346037	346152	YLR103C	CDC45	-	115	1.06909	1.02458	1.05516	0.557931
chrXII	116153	116281	YLL015W	BPT1	+	128	1.1408	0.594209	0.750792	0.412833
chrXII	54023	54179	YLL041C	SDH2	-	156	1.44365	0.888929	1.16911	-0.0366058
chrXI	567668	567768	YKR067W	GPT2	+	100	1.59211	0.75709	1.27314	-0.53026
chrXI	408144	408432	YKL015W	PUT3	+	288	2.75406	2.19712	1.75767	-0.875578
chrXI	392334	392477	YKL025C	PAN3	-	143	1.17727	1.11802	1.09864	-1.24467
chrXI	196112	196273	YKL130C	SHE2	-	161	0.949455	0.825136	1.3796	0.796773
chrX	675947	676066	YJR134C	SGM1	-	119	1.14655	1.04995	1.11336	0.116096
chrX	378560	378676	YJL036W	SNX4	+	116	1.43604	0.581345	1.01134	0.453124
chrX	256817	256917	YJL093C	TOK1	-	100	1.00611	0.439408	0.568147	-0.291753
chrX	236576	236795	YJL100W	LSB6	+	219	2.15837	1.61825	1.7956	0.49627
chrVIII	445543	445681	YHR171W	ATG7	+	138	0.804072	0.43438	0.944773	1.57328
chrVIII	168614	168714	YHR029C	YHI9	-	100	0.456736	0.837948	0.85399	0.399896
chrVIII	21579	21699	YHL039W	EFM1	+	120	1.04525	0.605302	0.905709	-0.509931
chrVII	1060097	1060247	YGR283C	0	-	150	1.46135	1.01498	1.10893	0.152361
chrVII	924523	924623	YGR216C	GPI1	-	100	1.21915	0.836776	1.04695	-1.10258
chrVII	846383	846483	YGR174C	CBP4	-	100	0.912618	0.83767	1.17373	-0.139389
chrVII	781548	781701	YGR145W	ENP2	+	153	-0.0543987	0.580586	0.947674	0.743213
chrVII	532660	532804	YGR024C	THG1	-	144	1.48696	0.769778	0.900351	-0.0815403
chrVII	459718	459818	YGL017W	ATE1	+	100	0.598666	0.623262	0.679628	-1.74652
chrVII	43199	43321	YGL243W	TAD1	+	122	0.951701	0.487989	0.599749	-1.40383
chrVI	226018	226201	YFR034C	PHO4	-	183	2.43657	1.9309	2.11979	1.03492
chrVI	184314	184446	YFR018C	0	-	132	1.24251	0.614482	0.830815	0.109277
chrV	553991	554091	YER183C	FAU1	-	100	0.304056	0.66985	0.492456	-1.07559
chrV	525781	525881	YER170W	ADK2	+	100	1.13136	0.854663	1.08357	-0.395006
chrV	328197	328364	YER086W	ILV1	+	167	1.83142	1.15167	1.49175	0.0293575
chrV	100426	100672	YEL027W	VMA3	+	246	1.80194	1.67575	1.23638	0.392776
chrIX	399619	399731	YIR023W	DAL81	+	112	1.27368	0.97901	0.847181	-1.18525
chrIX	345429	345529	YIL005W	EPS1	+	100	1.53189	1.11714	1.29349	0.457101
chrIX	148913	149083	YIL115C	NUP159	-	170	1.93431	1.18544	1.33035	-1.03381
chrIX	55062	55162	YIL153W	RRD1	+	100	1.06404	1.11281	1.39745	-1.15307
chrIV	1430834	1430978	YDR488C	PAC11	-	144	0.704168	0.257506	0.380728	-0.763956
chrIV	1358970	1359107	YDR449C	UTP6	-	137	1.60585	0.821977	1.10082	0.216199
chrIV	1330986	1331108	YDR434W	GPI17	+	122	-1.02435	0.745385	0.291266	1.08318
chrIV	769361	769461	YDR156W	RPA14	+	100	2.92475	2.24097	2.52149	1.29773
chrIV	654816	654958	YDR100W	TVP15	+	142	1.90708	1.50019	1.65104	1.14924
chrIV	629663	629782	YDR092W	UBC13	+	119	1.50622	0.883512	1.15473	0.882495
chrIV	399153	399283	YDL029W	ARP2	+	130	0.796139	0.716131	0.820689	0.534433
chrIV	167325	167431	YDL164C	CDC9	-	106	1.2904	0.895996	1.13609	-0.569024
chrIV	141813	141917	YDL177C	0	-	104	0.769319	0.543162	0.741838	0.30995
chrIV	117305	117591	YDL191W	RPL35A	+	286	2.96202	2.08495	2.31291	3.72371
chrIV	38309	38439	YDL232W	OST4	+	130	1.19397	0.639033	1.0217	-0.443388
chrIII	213892	214029	YCR051W	0	+	137	1.13267	0.456315	0.808461	-1.66827
chrIII	118425	118572	YCR002C	CDC10	-	147	1.05203	0.808695	0.838454	0.393703
chrII	706843	706943	YBR243C	ALG7	-	100	1.38877	1.43853	1.52907	1.37152
chrII	691754	691886	YBR236C	ABD1	-	132	0.715465	0.822617	0.898177	-1.53225
chrII	582234	582348	YBR173C	UMP1	-	114	1.57043	1.07392	1.27415	0.268172
chrII	565481	565604	YBR163W	EXO5	+	123	1.30594	0.988046	1.22112	0.159019
chrII	360351	360591	YBR059C	AKL1	-	240	2.58884	1.90192	2.01778	1.00501
chrII	132233	132385	YBL047C	EDE1	-	152	0.91481	0.271714	0.57727	-0.336237
chrII	100186	100327	YBL066C	SEF1	-	141	0.0350539	0.506923	0.0923688	-1.30153
chrII	80784	80932	YBL078C	ATG8	-	148	0.558214	0.282354	0.618264	-0.276373
chrXVI	895818	895917	YPR179C	HDA3	-	99	-0.241825	0.711297	0.670156	-0.394551
chrXVI	704692	704791	YPR082C	DIB1	-	99	0.814039	0.580769	0.678444	-0.785624
chrXVI	673533	673644	YPR058W	YMC1	+	111	1.28787	1.07978	1.04212	-1.03794
chrXVI	534774	534924	YPL010W	RET3	+	150	1.42521	0.761603	1.07656	0.00357467
chrXVI	420604	420713	YPL071C	0	-	109	1.08957	0.763921	0.992893	0.678612
chrXVI	292502	292601	YPL138C	SPP1	-	99	0.674836	0.247687	0.46481	0.662365
chrXVI	49003	49191	YPL260W	0	+	188	1.41773	0.91946	1.03091	0.424072
chrXV	1009767	1009866	YOR357C	SNX3	-	99	1.2903	1.17428	0.942129	-0.887704
chrXV	986580	986710	YOR347C	PYK2	-	130	1.30431	1.03967	1.26493	0.437308
chrXV	826150	826266	YOR269W	PAC1	+	116	1.42487	0.856829	0.975724	-0.3682
chrXV	792303	792443	YOR243C	PUS7	-	140	1.45179	0.890779	1.3181	-0.724935
chrXV	441218	441358	YOR061W	CKA2	+	140	2.59866	1.77133	2.38465	0.151617
chrXV	246948	247065	YOL044W	PEX15	+	117	0.963343	0.736906	0.65821	0.413213
chrXV	212051	212168	YOL061W	PRS5	+	117	0.984254	0.40293	0.675156	-0.742891
chrXV	69032	69349	YOL136C	PFK27	-	317	2.40953	1.48261	1.67964	-0.0497319
chrXV	48711	48833	YOL146W	PSF3	+	122	1.80992	1.28001	1.82692	-0.206064
chrXIV	699496	699642	YNR039C	ZRG17	-	146	1.16678	0.474311	1.0334	-0.296168
chrXIV	592945	593078	YNL022C	RCM1	-	133	1.55897	0.98094	1.3429	-0.320377
chrXIV	287661	287768	YNL187W	SWT21	+	107	0.420783	0.393376	0.192149	-0.0609533
chrXIV	186952	187080	YNL245C	CWC25	-	128	1.50702	1.00762	1.23583	0.0649
chrXIV	140598	140744	YNL267W	PIK1	+	146	0.776442	0.29284	0.423658	2.74088
chrXIII	896760	896873	YMR310C	0	-	113	0.785973	0.316179	0.395542	-0.975041
chrXIII	777177	777276	YMR253C	0	-	99	0.678234	0.644107	0.999403	0.142803
chrXIII	390939	391040	YMR059W	SEN15	+	101	0.672192	0.441093	0.694722	-0.0681495
chrXII	1035840	1035977	YLR451W	LEU3	+	137	1.31051	0.492508	1.01993	-0.316861
chrXII	802461	802592	YLR336C	SGD1	-	131	0.0581473	-0.0388641	0.185705	-0.402211
chrXII	764614	764741	YLR315W	NKP2	+	127	1.32195	0.81759	1.25305	-0.400353
chrXII	556604	556703	YLR207W	HRD3	+	99	1.51887	1.23119	1.43528	-0.119863
chrXII	136408	136508	YLL007C	0	-	100	0.562326	0.25668	0.456542	0.814736
chrXII	86947	87168	YLL027W	ISA1	+	221	2.06835	1.49317	1.86868	0.478448
chrXI	570984	571087	YKR068C	BET3	-	103	1.67131	1.16921	1.21297	-0.53857
chrXI	562342	562472	YKR064W	OAF3	+	130	1.36279	0.876948	1.17762	0.0489708
chrXI	559392	559566	snR42	SNR42	-	174	1.68925	1.07999	1.64716	0.56229
chrXI	518952	519288	YKR042W	UTH1	+	336	3.12158	1.84213	2.25926	0.710898
chrXI	385583	385703	YKL028W	TFA1	+	120	1.92493	1.46988	1.31864	-0.566786
chrXI	220147	220246	YKL117W	SBA1	+	99	1.85176	1.06	1.37908	-0.123642
chrXI	217045	217180	YKL120W	OAC1	+	135	2.64347	1.77791	1.98557	0.261974
chrX	503578	503677	YJR039W	0	+	99	0.707955	0.288329	0.604527	-0.578013
chrX	262587	262698	YJL091C	GWT1	-	111	1.1583	0.692411	1.00204	0.425305
chrX	111413	111556	YJL164C	TPK1	-	143	1.60339	1.05764	1.11001	0.65071
chrVIII	352542	352660	YHR121W	LSM12	+	118	1.59434	1.20531	1.53114	-0.244224
chrVII	641828	641957	YGR080W	TWF1	+	129	0.459114	0.11485	0.264612	-0.619474
chrVII	475300	475439	YGL011C	SCL1	-	139	1.22937	0.880113	0.841181	-0.313304
chrVII	345782	345959	snR10	SNR10	+	177	1.83381	1.6804	1.5615	0.0443294
chrVII	229880	230156	YGL145W	TIP20	+	276	3.20376	2.98491	2.49834	-0.451861
chrVII	152883	152993	YGL186C	TPN1	-	110	0.900383	0.76761	0.911178	0.545045
chrV	374755	374883	YER107C	GLE2	-	128	0.432165	0.386098	0.303359	2.00753
chrV	327083	327213	YER083C	GET2	-	130	1.38903	0.980001	1.17857	-0.83831
chrV	319789	319907	YER080W	AIM9	+	118	0.789403	0.698398	0.780968	-0.287539
chrV	182420	182536	YER014W	HEM14	+	116	0.676422	-0.0655397	0.430721	-0.271184
chrIX	212293	212426	YIL078W	THS1	+	133	1.30397	1.29355	1.32812	-0.159829
chrIX	113359	113470	YIL129C	TAO3	-	111	1.07556	1.08089	0.855358	-0.362453
chrIX	77802	77959	YIL144W	NDC80	+	157	0.78226	0.725241	1.03541	0.448671
chrIV	1414398	1414523	YDR478W	SNM1	+	125	-0.751849	0.516019	0.668067	-0.455118
chrIV	1261418	1261539	YDR394W	RPT3	+	121	1.68467	1.32567	1.45141	0.49058
chrIV	1224589	1224715	YDR374W-A	WIP1	+	126	0.991148	0.680501	0.845539	-1.17084
chrIV	844950	845067	YDR192C	NUP42	-	117	1.10812	0.907944	0.921522	-0.319406
chrIV	771634	771749	YDR159W	SAC3	+	115	0.065987	0.501723	0.32081	0.282809
chrIV	626133	626295	YDR090C	0	-	162	1.4017	0.827255	1.05868	0.744147
chrIV	471588	471786	YDR012W	RPL4B	+	198	1.2541	1.29011	1.32805	0.437703
chrIV	255199	255303	YDL115C	IWR1	-	104	0.671452	0.405833	0.494551	-0.423758
chrIV	212102	212218	YDL139C	SCM3	-	116	1.15929	0.587876	0.622295	1.07471
chrIII	24630	24729	YCL057W	PRD1	+	99	1.35893	0.913582	1.10957	-0.454365
chrII	757251	757350	YBR275C	RIF1	-	99	0.766419	0.912529	1.02058	0.254607
chrII	528084	528218	YBR141C	BMT2	-	134	1.79993	1.06216	1.22943	0.238134
chrII	486772	486904	YBR123C	TFC1	-	132	1.57955	1.60504	1.83003	1.21237
chrII	466956	467140	YBR114W	RAD16	+	184	2.15867	1.3442	1.79632	0.270076
chrII	400947	401110	YBR080C	SEC18	-	163	1.52647	1.24845	1.1908	1.37235
chrII	201810	201981	YBL014C	RRN6	-	171	1.39826	0.954864	1.08971	0.705361
chrI	87103	87236	YAL030W	SNC1	+	133	0.863735	0.496556	0.723738	-0.309048
chrXVI	751996	752183	YPR112C	MRD1	-	187	1.94243	1.24053	1.45028	0.413334
chrXVI	648420	648555	YPR041W	TIF5	+	135	1.38685	0.8433	1.09577	0.4789
chrXVI	627045	627190	YPR029C	APL4	-	145	1.05363	0.258617	0.634897	0.979062
chrXVI	271037	271223	YPL149W	ATG5	+	186	1.31475	0.95642	1.19601	0.299059
chrXV	803508	803606	YOR252W	TMA16	+	98	0.801318	0.859045	0.944469	0.0528286
chrXV	802360	802458	YOR250C	CLP1	-	98	0.947051	0.626435	1.0849	-0.0154429
chrXV	602456	602585	YOR143C	THI80	-	129	0.893036	0.456026	0.867115	1.70805
chrXV	337392	337537	YOR005C	DNL4	-	145	0.352157	0.467581	0.512901	-0.0632365
chrXV	255156	255264	YOL038W	PRE6	+	108	1.30669	0.946217	0.979933	0.141704
chrXV	185232	185375	YOL077W-A	ATP19	+	143	1.18001	0.938638	0.961445	0.285568
chrXIV	708324	708439	YNR047W	FPK1	+	115	1.08726	0.436038	0.935378	-0.845028
chrXIV	619773	619999	YNL006W	LST8	+	226	2.66607	2.12818	2.24469	0.733056
chrXIV	613445	613552	YNL010W	0	+	107	1.06625	1.25138	1.32857	2.27919
chrXIV	545035	545168	YNL044W	YIP3	+	133	0.986697	0.450965	0.658873	-0.418863
chrXIV	366559	366686	YNL138W	SRV2	+	127	1.02274	0.990694	0.888553	-0.307974
chrXIV	295752	295905	YNL183C	NPR1	-	153	1.10263	0.603062	0.75722	0.00715751
chrXIV	255046	255199	YNL207W	RIO2	+	153	0.946783	0.332854	0.636763	-0.877349
chrXIV	200291	200389	YNL239W	LAP3	+	98	0.742323	0.513237	0.690321	-0.315024
chrXIII	869713	869822	YMR301C	ATM1	-	109	0.687394	0.458743	0.49397	-0.557224
chrXIII	801543	801641	YMR267W	PPA2	+	98	-0.792549	0.246501	-0.612494	0.492784
chrXIII	574894	574999	YMR160W	0	+	105	0.773215	0.79779	0.895454	-0.687083
chrXIII	236128	236484	YML018C	0	-	356	2.12426	1.57444	1.56944	0.978992
chrXIII	119079	119205	YML075C	HMG1	-	126	0.620879	0.710577	0.97659	2.68309
chrXIII	14799	14916	YML129C	COX14	-	117	1.6882	1.33207	1.26658	0.17229
chrXIII	7107	7216	YML132W	COS3	+	109	1.39558	0.182715	0.676246	0.0224138
chrXII	1018970	1019237	YLR441C	RPS1A	-	267	4.33984	2.79906	3.41864	1.94008
chrXII	781446	781744	YLR325C	RPL38	-	298	3.26911	2.30997	2.50678	1.54363
chrXII	779014	779117	YLR323C	CWC24	-	103	0.858512	0.367109	0.893865	-0.364726
chrXII	718016	718114	YLR290C	0	-	98	0.111284	0.739278	1.09808	0.112437
chrXII	680004	680116	YLR268W	SEC22	+	112	0.484057	0.74985	0.60397	-0.904662
chrXII	286648	286746	YLR078C	BOS1	-	98	1.00332	0.880388	0.961031	-0.244449
chrXII	237807	237947	YLR045C	STU2	-	140	0.217394	0.201605	0.15722	2.51806
chrXII	183468	183566	YLR021W	IRC25	+	98	0.926657	0.766804	1.00204	-0.465394
chrXII	39569	39691	YLL051C	FRE6	-	122	1.44793	1.13226	1.21868	-0.864734
chrXI	168862	169013	YKL149C	DBR1	-	151	0.882381	0.293261	0.542787	-0.379621
chrXI	161389	161487	YKL154W	SRP102	+	98	0.436141	0.759511	0.975118	-0.0255143
chrXI	24923	25117	YKL216W	URA1	+	194	2.47318	1.80733	2.02551	-0.115697
chrX	744026	744150	YJR161C	COS5	-	124	1.43668	0.380705	0.836705	-0.160931
chrX	644181	644296	YJR118C	ILM1	-	115	0.88878	0.952745	1.0699	2.1679
chrX	507567	507676	YJR040W	GEF1	+	109	1.02763	0.637342	0.951777	-0.28775
chrX	468342	468444	YJR019C	TES1	-	102	0.748837	0.759806	0.987306	-0.443798
chrX	184339	184437	YJL126W	NIT2	+	98	1.08397	0.887605	1.03942	-1.02475
chrX	96568	96666	YJL173C	RFA3	-	98	1.01889	1.01766	0.911569	-0.584865
chrVIII	459056	459225	YHR178W	STB5	+	169	2.06664	1.11756	1.80519	0.382888
chrVIII	448073	448199	YHR172W	SPC97	+	126	1.09542	0.475923	0.751689	0.9887
chrVIII	384795	384980	YHR143W	DSE2	+	185	1.99031	1.36573	1.76356	1.1888
chrVIII	207311	207445	YHR050W	SMF2	+	134	2.21634	1.52397	2.2671	1.36622
chrVIII	67564	67704	YHL020C	OPI1	-	140	1.32027	0.889001	1.15969	-0.706853
chrVII	996672	996794	YGR252W	GCN5	+	122	-0.395282	1.11807	1.0387	-0.769229
chrVII	908871	909051	YGR205W	TDA10	+	180	1.24619	0.712457	0.964095	0.550231
chrVII	439862	439971	YGL029W	CGR1	+	109	1.22214	0.580017	0.801292	0.877851
chrVII	299807	299915	YGL112C	TAF6	-	108	1.27467	0.605256	1.20768	-1.05536
chrVII	245221	245360	YGL140C	0	-	139	1.02254	0.525178	0.883886	-0.208031
chrVII	41272	41414	YGL244W	RTF1	+	142	1.38791	1.07384	1.37486	0.896885
chrVII	31723	31854	YGL250W	RMR1	+	131	1.76823	0.863521	1.15959	-0.838292
chrVI	248181	248323	YFR049W	YMR31	+	142	0.909965	0.98623	0.780081	0.131477
chrV	214809	214950	YER031C	YPT31	-	141	2.05856	1.35897	1.84713	-0.999757
chrV	111144	111295	YEL023C	0	-	151	1.06185	0.955175	0.692973	0.268305
chrV	86076	86174	YEL033W	MTC7	+	98	0.0915694	-0.333841	-0.28538	0.120988
chrIX	414843	414977	YIR031C	DAL7	-	134	1.17941	0.822763	0.883993	-0.851531
chrIX	260997	261103	YIL048W	NEO1	+	106	1.66291	1.3909	1.44828	0.203611
chrIX	249107	249471	YIL057C	RGI2	-	364	3.35391	2.55235	2.72229	1.9694
chrIX	235557	235655	YIL068C	SEC6	-	98	0.97612	0.4886	0.848453	0.241105
chrIX	165982	166289	YIL106W	MOB1	+	307	1.45847	1.93859	1.26286	2.7152
chrIV	1054962	1055126	YDR296W	MHR1	+	164	2.09501	1.77985	1.55093	0.233667
chrIV	964856	965014	YDR254W	CHL4	+	158	1.53951	1.6338	1.56272	1.13307
chrIV	65066	65173	YDL219W	DTD1	+	107	0.879908	0.641138	0.734375	0.179334
chrIII	178825	178980	snR189	SNR189	-	155	1.2777	1.04433	1.00965	-0.509561
chrIII	35450	35548	YCL051W	LRE1	+	98	0.327467	0.237078	0.39491	-1.62633
chrII	792649	792771	YBR295W	PCA1	+	122	1.00015	0.248625	0.562985	0.161142
chrII	744688	744802	YBR271W	EFM2	+	114	1.09659	0.880275	1.0339	-0.905204
chrII	738388	738486	YBR264C	YPT10	-	98	0.83472	0.60302	1.00651	0.185551
chrII	458453	458558	YBR109C	CMD1	-	105	1.17065	1.00681	0.881179	0.20883
chrII	172313	172473	YBL024W	NCL1	+	160	0.68149	1.10394	0.821865	0.0219563
chrI	119675	119835	YAL017W	PSK1	+	160	0.413234	0.40305	0.633531	-0.286944
chrXVI	912516	912613	YPR189W	SKI3	+	97	0.485295	0.562971	0.750612	-0.854572
chrXVI	888775	888896	YPR174C	0	-	121	2.04923	1.47053	1.75892	-0.775549
chrXVI	667454	667588	YPR052C	NHP6A	-	134	0.64771	0.372975	0.600752	-0.415475
chrXVI	386754	386858	YPL085W	SEC16	+	104	0.916102	0.612277	0.929379	0.815329
chrXVI	338722	338841	YPL112C	PEX25	-	119	2.99194	1.63745	2.13588	-0.828509
chrXV	1031357	1031524	YOR370C	MRS6	-	167	1.67552	1.28378	1.46285	-0.564387
chrXV	908270	908413	YOR316C-A	0	-	143	0.585764	0.934649	0.808438	0.814445
chrXV	851892	852025	YOR287C	RRP36	-	133	1.16532	0.410407	0.820643	0.792191
chrXV	825715	826003	YOR268C	0	-	288	4.04287	3.14415	3.26346	1.92687
chrXV	780681	780861	YOR236W	DFR1	+	180	1.26962	0.723759	0.885386	0.637097
chrXV	223055	223159	YOL056W	GPM3	+	104	0.360923	0.684475	0.790903	1.13221
chrXIV	675881	676078	YNR028W	CPR8	+	197	1.91229	1.24367	1.49333	0.704328
chrXIV	622767	622864	YNL004W	HRB1	+	97	1.29707	1.22174	1.01087	0.777576
chrXIV	380897	381041	YNL130C	CPT1	-	144	1.35465	1.31308	1.32659	1.25854
chrXIV	117239	117336	YNL277W	MET2	+	97	0.566388	0.211247	0.483059	-0.418326
chrXIII	848557	848654	YMR289W	ABZ2	+	97	-0.0617485	0.363797	0.393449	-0.360503
chrXIII	667312	667446	YMR202W	ERG2	+	134	2.86572	1.47511	1.87094	0.17917
chrXIII	513383	513526	YMR123W	PKR1	+	143	1.40587	1.07525	1.25665	0.42044
chrXIII	497537	497634	YMR115W	MGR3	+	97	0.870107	0.773662	0.944868	-1.04894
chrXIII	492042	492154	YMR110C	HFD1	-	112	-0.504575	0.781214	1.03419	1.57308
chrXIII	330290	330387	YMR029C	FAR8	-	97	0.940285	0.848513	0.967696	-0.484181
chrXIII	290889	290990	YMR012W	CLU1	+	101	2.16796	1.006	1.25345	0.0923287
chrXIII	181235	181365	YML046W	PRP39	+	130	1.06355	0.828481	1.07108	-1.02292
chrXIII	151689	151786	YML060W	OGG1	+	97	-0.349643	0.655267	0.695171	-0.338319
chrXII	899000	899151	snR34	SNR34	+	151	2.12574	1.5072	1.85327	0.404355
chrXII	757175	757305	YLR310C	CDC25	-	130	0.866519	0.430646	1.01314	0.305312
chrXII	432041	432138	YLR145W	RMP1	+	97	0.130786	0.397666	0.839712	-0.842324
chrXII	377816	377932	YLR115W	CFT2	+	116	1.42548	0.77475	1.22239	0.143238
chrXII	327520	327670	YLR093C	NYV1	-	150	1.65543	1.00331	1.29081	-0.40446
chrXII	293648	293753	YLR082C	SRL2	-	105	0.628254	0.156033	0.423714	1.29368
chrXII	193502	193599	YLR024C	UBR2	-	97	0.883941	0.748182	0.576398	-0.866131
chrXII	159867	159974	YLR005W	SSL1	+	107	0.805648	0.480197	0.496464	-0.572752
chrXII	88317	88422	YLL026W	HSP104	+	105	0.884016	0.787766	1.05878	-0.45841
chrXII	35286	35383	YLL054C	0	-	97	0.238447	0.299888	0.396649	-0.679021
chrXI	619488	619608	YKR095W	MLP1	+	120	1.90709	1.18604	1.69568	0.679868
chrXI	269551	269648	YKL092C	BUD2	-	97	1.11237	1.00316	1.4194	0.23231
chrX	656054	656166	YJR125C	ENT3	-	112	0.88867	0.717296	0.574936	1.10166
chrX	615263	615374	YJR098C	0	-	111	1.88719	1.4815	1.45947	-1.30592
chrX	424182	424284	YJL006C	CTK2	-	102	1.68054	0.832398	1.01675	0.740606
chrX	365540	365689	YJL041W	NSP1	+	149	-0.0490369	0.230768	0.626916	-0.656111
chrX	315608	315720	YJL065C	DLS1	-	112	1.24373	1.00622	1.10169	-0.761304
chrVIII	508719	508880	YHR205W	SCH9	+	161	0.957312	0.464222	0.60044	-0.374124
chrVIII	401047	401258	YHR151C	MTC6	-	211	3.41136	2.78654	2.97989	1.03507
chrVIII	375344	375607	YHR137W	ARO9	+	263	3.83631	2.66601	2.93113	0.10977
chrVIII	223809	223906	YHR062C	RPP1	-	97	1.17984	0.85633	1.05376	0.279828
chrVIII	113255	113354	YHR004C	NEM1	-	99	1.10425	0.776646	1.15543	1.96485
chrVII	944893	945012	YGR225W	AMA1	+	119	0.815917	1.12895	1.29888	1.12248
chrVII	687725	687822	YGR099W	TEL2	+	97	1.0143	0.63681	0.918063	-0.501422
chrVII	454604	454756	YGL021W	ALK1	+	152	0.526876	0.19765	0.334334	-0.665332
chrVII	438470	438954	YGL031C	RPL24A	-	484	2.41757	1.68408	1.85143	5.67307
chrVII	437014	437187	YGL032C	AGA2	-	173	1.78445	1.32011	1.32271	2.19299
chrVII	291757	291892	YGL115W	SNF4	+	135	1.81504	1.355	1.47577	-0.838313
chrVII	265969	266066	YGL130W	CEG1	+	97	0.732513	0.614913	0.817099	-0.549484
chrVII	147973	148214	YGL190C	CDC55	-	241	-0.574663	0.851373	0.218786	1.2233
chrVII	79003	79138	YGL224C	SDT1	-	135	0.951539	0.944474	0.974996	-0.18193
chrVII	48457	48565	YGL240W	DOC1	+	108	0.795987	0.637765	0.593811	-0.897434
chrV	42702	42799	YEL059C-A	SOM1	-	97	0.495791	0.138021	0.116451	-0.376994
chrIV	1129403	1129540	YDR331W	GPI8	+	137	1.26464	0.818663	0.982416	-0.23273
chrIV	851059	851156	YDR197W	CBS2	+	97	0.511999	0.654881	0.696598	-1.35544
chrIV	775837	775963	YDR160W	SSY1	+	126	0.719937	0.546864	0.600852	1.95658
chrIV	610194	610314	YDR082W	STN1	+	120	1.20842	0.92705	1.04211	-0.202967
chrIV	583547	583644	YDR068W	DOS2	+	97	0.746948	0.673534	0.920676	1.51237
chrIII	197254	197364	YCR037C	PHO87	-	110	0.479356	0.473684	0.81008	1.09129
chrIII	40794	40891	YCL049C	0	-	97	0.944353	0.801053	0.865251	-0.805548
chrII	734677	734774	YBR260C	RGD1	-	97	1.07414	0.903407	1.13333	-1.27862
chrII	728181	728307	YBR256C	RIB5	-	126	2.0685	1.44519	1.91895	0.0274722
chrII	496958	497093	YBR130C	SHE3	-	135	0.842366	0.503741	0.657955	-0.28795
chrII	408967	409064	YBR083W	TEC1	+	97	0.489591	0.209596	0.317872	1.82701
chrII	365770	365869	YBR061C	TRM7	-	99	-0.0364313	0.407958	0.495696	2.51755
chrII	159748	160072	YBL032W	HEK2	+	324	3.95292	3.46371	3.35572	0.0299457
chrII	146987	147088	YBL037W	APL3	+	101	1.10153	0.724619	0.905585	0.126771
chrI	132036	132168	YAL011W	SWC3	+	132	0.500539	0.325012	0.305935	-1.07427
chrXVI	900565	900690	YPR183W	DPM1	+	125	1.40049	1.30755	1.66198	-0.154372
chrXVI	709937	710033	YPR086W	SUA7	+	96	0.759335	0.665234	0.683817	-1.4709
chrXVI	538984	539121	YPL008W	CHL1	+	137	1.78516	0.93348	1.52558	0.0538445
chrXVI	386511	386607	YPL086C	ELP3	-	96	0.580095	0.0229354	0.2999	-0.195005
chrXVI	291131	291234	YPL139C	UME1	-	103	1.52153	0.936383	1.33906	-0.341908
chrXVI	237179	237284	YPL167C	REV3	-	105	0.77092	0.574804	0.907391	-0.207806
chrXV	1017582	1017722	YOR361C	PRT1	-	140	1.29554	0.783019	0.924804	0.453896
chrXV	1010887	1011032	YOR359W	VTS1	+	145	2.0547	1.42963	1.5637	-0.0994924
chrXV	1000895	1001046	YOR353C	SOG2	-	151	-0.364999	0.73985	0.540425	-0.710339
chrXV	820818	820914	YOR266W	PNT1	+	96	0.53705	0.557579	0.577265	0.835952
chrXV	606236	606532	YOR147W	MDM32	+	296	2.15988	3.04595	2.58004	0.843489
chrXV	605178	605307	YOR144C	ELG1	-	129	0.722332	0.484889	0.541763	0.754484
chrXV	544426	544555	YOR116C	RPO31	-	129	1.42089	1.11865	0.861805	0.975844
chrXV	316253	316371	YOL005C	RPB11	-	118	1.52053	1.02278	1.28491	-0.198542
chrXV	56315	56411	YOL141W	PPM2	+	96	0.106694	0.418472	0.470148	-0.01885
chrXV	44793	44889	YOL149W	DCP1	+	96	1.03109	0.855226	1.30651	-1.38233
chrXIV	707583	707725	YNR046W	TRM112	+	142	1.47223	0.955633	1.07892	-0.876234
chrXIV	674755	674851	YNR027W	BUD17	+	96	1.08937	0.780201	1.0814	-1.3039
chrXIV	365850	365964	YNL139C	THO2	-	114	1.42386	1.03728	1.22778	0.329005
chrXIV	310230	310484	YNL172W	APC1	+	254	2.3854	1.75383	2.01198	0.668516
chrXIV	200048	200144	YNL240C	NAR1	-	96	1.22908	0.859817	1.06179	0.0668625
chrXIV	157931	158055	YNL259C	ATX1	-	124	0.562526	0.321652	0.326515	-0.842509
chrXIII	763142	763306	snR86	SNR86	-	164	1.08375	0.440266	0.904954	0.819249
chrXIII	594742	594838	YMR167W	MLH1	+	96	0.770669	0.593862	0.71886	-0.405977
chrXIII	115394	115515	YML076C	WAR1	-	121	1.33814	0.915443	1.09124	-0.262907
chrXIII	104484	104612	YML081W	TDA9	+	128	1.01113	0.577759	0.547364	-0.491505
chrXIII	92070	92172	YML088W	UFO1	+	102	2.21013	1.20313	1.59493	-0.274496
chrXII	1066970	1067066	YLR466W	YRF1-4	+	96	0	0	0	0
chrXII	928609	928705	YLR404W	FLD1	+	96	-0.39902	0.967221	0.872648	3.24156
chrXII	833688	833851	YLR353W	BUD8	+	163	2.28223	1.5258	1.90413	0.729753
chrXII	605029	605125	YLR229C	CDC42	-	96	1.90995	1.21964	1.28775	0.240972
chrXII	573267	573363	YLR216C	CPR6	-	96	0.914611	0.752845	0.917518	-0.0804833
[truncated: 1,812 more rows]

## Sheet: tDNA occupancy
Name	Hmo1	Rsc1	Rsc2	Rsc3
tP(UGG)A	-0.243044	4.79593	2.62737	3.42492
tA(UGC)A	-0.415773	2.96425	1.6721	2.12104
tL(CAA)A	0.31683	3.94322	2.52968	2.99226
tS(AGA)A	-0.770527	2.7149	1.40846	1.99354
tL(UAA)B1	-0.361005	3.52882	1.89192	2.52959
tF(GAA)B	0.459067	3.69273	2.13904	2.69178
tI(AAU)B	-1.08362	2.84188	1.48864	1.69376
tG(GCC)B	-1.01	2.89106	1.39097	1.74699
tS(AGA)B	-0.120368	3.67088	2.4281	2.5091
tT(AGU)B	-0.467856	3.82665	2.10902	2.60483
tV(UAC)B	-0.447284	3.33216	1.79014	2.42435
tL(UAA)B2	0.18426	3.41827	2.06624	2.57375
tQ(UUG)B	-0.0927167	2.87574	1.68764	2.12771
tR(UCU)B	-0.796917	2.45071	1.25959	1.50049
tD(GUC)B	-0.730139	3.07202	1.65494	2.03621
tC(GCA)B	-0.390839	2.44829	1.05348	1.57077
tE(UUC)B	0.0870861	3.25089	2.02201	2.21683
tE(UUC)C	-0.122497	2.62016	1.57387	1.67719
tL(CAA)C	-0.0982175	2.71148	1.4203	1.70682
tP(AGG)C	-0.294731	3.92938	2.20851	2.74539
tN(GUU)C	-0.393897	3.05749	1.67879	2.13589
tG(GCC)C	-1.0545	2.41817	1.18465	1.58185
tM(CAU)C	-1.25313	2.54265	1.08773	2.66512
tK(CUU)C	-2.23702	4.67721	3.79579	3.8124
tQ(UUG)C	-0.49655	3.23634	1.94597	2.21487
tS(CGA)C	-0.119975	3.08016	1.6409	2.28715
tT(AGU)C	-0.467142	2.97323	1.41036	1.80699
tG(GCC)D1	-0.902568	2.79078	1.48151	2.00499
tK(UUU)D	-0.517656	3.41424	1.59925	2.49503
tA(AGC)D	-0.602022	3.62415	2.1136	2.73165
tT(AGU)D	0.291418	2.87598	1.84889	2.12195
tS(AGA)D1	-0.733877	3.75761	2.2275	2.61195
tV(UAC)D	0.220589	2.8291	1.44449	1.93782
tL(UAA)D	-0.653398	3.76956	2.10749	2.48131
tQ(UUG)D1	-0.439761	2.41231	1.09746	1.44954
tR(UCU)D	-0.651047	2.47456	1.20719	1.57195
tD(GUC)D	-0.588776	3.65915	2.02537	2.75503
tR(ACG)D	-0.646252	3.49192	1.78177	2.24438
tQ(UUG)D2	-0.263997	3.04029	1.80659	2.17247
tI(AAU)D	-0.4492	2.76244	1.52126	1.79274
tQ(UUG)D3	-0.365458	2.33752	1.32718	1.64375
tI(UAU)D	-0.680505	3.72203	1.84115	2.38762
tY(GUA)D	-0.499602	2.43381	1.52947	1.84899
tS(AGA)D2	-0.87659	3.63936	2.22668	2.53708
tG(GCC)D2	-0.502093	3.19192	2.16624	2.32659
tE(CUC)D	-0.173633	3.04028	1.68077	1.90185
tV(CAC)D	-0.119952	2.23045	1.04224	1.39269
tF(GAA)D	-0.705485	4.16574	2.10589	2.97526
tX(XXX)D	-0.084982	3.63298	2.00068	2.51415
tM(CAU)D	-0.598463	2.30324	1.19088	1.38348
tK(CUU)D1	0.0986247	3.17721	1.92832	2.18472
tG(CCC)D	-0.965319	3.66611	2.06274	2.28944
tS(AGA)D3	-0.339246	2.62478	1.03821	1.78926
tK(CUU)D2	-0.231732	3.02461	1.82322	2.1266
tL(CAA)D	0.442511	3.38995	2.19141	2.5086
tT(AGU)I1	-0.157522	3.01039	1.61985	2.07632
tI(AAU)I1	-0.544358	2.26841	0.828392	1.3382
tE(CUC)I	-0.0533333	3.92251	2.42633	2.73024
tI(AAU)I2	-0.242786	2.94621	1.59105	1.80896
tS(UGA)I	-0.0556573	3.04342	1.78758	2.11211
tK(CUU)I	-0.0939274	3.25888	1.77064	2.01046
tD(GUC)I1	-0.854239	3.23193	2.05899	2.42562
tT(AGU)I2	-0.216449	2.98556	1.57788	2.10097
tD(GUC)I2	-0.770761	3.04831	1.83004	2.52644
tE(UUC)I	0.147703	2.93639	1.68916	2.04082
tG(GCC)E	-0.609208	2.97294	1.65508	2.11655
tS(AGA)E	-0.751824	2.68934	0.916277	1.69594
tM(CAU)E	-1.13144	2.67591	1.38609	1.67381
tQ(UUG)E2	0.136735	2.97342	1.8175	2.22628
tK(CUU)E1	-0.717273	3.04466	1.59401	2.05392
tR(UCU)E	-0.451625	3.51227	2.1798	2.51398
tE(UUC)E1	0.0730667	3.11624	1.87801	2.07025
tH(GUG)E1	0.793386	2.81918	1.67636	1.89717
tQ(UUG)E1	0.0338931	2.37467	1.3887	1.62049
tS(UGA)E	-0.31369	3.25298	1.5732	2.36331
tA(UGC)E	0.203801	3.56268	1.91675	2.48224
tE(UUC)E2	0.261593	3.1298	1.98223	1.9784
tH(GUG)E2	0.0259333	2.73334	1.59436	1.83292
tK(CUU)E2	-0.354045	3.39449	2.02377	2.18573
tV(AAC)E1	0.690927	3.13414	1.97968	2.23132
tI(AAU)E1	0.0596135	3.30622	1.61834	2.09663
tV(AAC)E2	0.152454	2.73058	1.65882	1.88064
tE(UUC)E3	-0.614553	2.92609	1.50569	1.73896
tR(ACG)E	-0.349252	2.80496	1.46157	1.78788
tI(AAU)E2	-0.0720324	3.06834	1.63227	2.08687
tP(UGG)F	-0.676031	4.09467	2.34573	2.99916
tN(GUU)F	-0.460964	2.7322	1.41114	2.03392
tF(GAA)F	-0.330566	3.40663	1.57593	2.31741
tG(GCC)F1	-1.1013	2.81011	1.25402	1.62362
tY(GUA)F1	-0.523911	2.82902	1.55206	2.02823
tG(GCC)F2	-0.914997	2.73235	1.48035	1.89945
tS(GCU)F	-0.859247	3.83674	2.01748	2.77178
tA(AGC)F	-0.899544	4.03337	2.3771	3.04144
tY(GUA)F2	-0.446412	2.88438	1.55439	2.05839
tK(CUU)F	-0.613416	3.6582	1.99187	2.60764
tV(AAC)G3	0.302578	3.32028	2.09564	2.5465
tH(GUG)G1	0.712894	2.77633	1.79179	1.93476
tK(UUU)G1	-0.0926292	3.54712	2.1122	2.53333
tK(CUU)G1	-0.197158	2.81877	1.51942	1.96765
tK(CUU)G2	-0.573642	2.96916	1.51805	2.05348
tL(CAA)G1	0.279784	3.28234	2.04803	2.38281
tW(CCA)G1	0.207379	2.6259	1.42389	1.76118
tH(GUG)G2	-0.1933	3.42309	2.22649	2.58207
tE(UUC)G1	-0.240664	3.60841	2.02775	2.65438
tE(UUC)G2	-0.413142	3.60717	2.03772	2.59489
tR(UCU)G1	-0.268271	4.00757	2.07398	2.70523
tV(AAC)G1	0.2179	2.99921	1.83115	2.33116
tL(CAA)G2	0.535839	3.83438	2.27624	2.65411
tF(GAA)G	-0.253545	2.71667	1.36266	1.74549
tD(GUC)G1	-0.925176	3.48656	2.01675	2.59892
tE(UUC)G3	-0.159264	2.4504	1.27484	1.51105
tD(GUC)G2	-0.260317	3.35823	1.91839	2.51981
tS(AGA)G	-0.794776	3.74682	2.34872	2.6798
tT(UGU)G1	3.8098	3.64697	2.21737	2.89053
tL(GAG)G	-0.550483	3.23105	1.54239	2.05233
tK(UUU)G2	-0.0216562	2.91317	1.43266	2.02715
tC(GCA)G	-0.510101	2.24293	1.15535	1.36335
tN(GUU)G	-0.681532	3.19195	1.65222	2.2084
tR(UCU)G3	-0.134347	3.16956	1.97061	2.29167
tI(AAU)G	0.378872	3.30743	2.0485	2.19113
tA(AGC)G	-0.603125	3.35468	1.8448	2.3267
tG(UCC)G	-0.543024	2.94162	1.79559	1.98812
tA(UGC)G	-0.528336	3.11472	1.58357	2.07559
tV(AAC)G2	0.349774	2.74126	1.75891	1.888
tR(UCU)G2	-0.383253	3.27538	1.92716	2.50238
tG(GCC)G1	-0.467308	3.53402	2.17377	2.48397
tL(CAA)G3	0.367271	3.27	1.81932	2.29908
tK(CUU)G3	-0.763773	3.1183	1.78443	2.23099
tW(CCA)G2	0.543257	3.5498	1.96147	2.58601
tG(GCC)G2	-0.921562	3.98703	2.23697	2.85119
tT(UGU)G2	0.0190153	3.47271	1.96839	2.47767
tH(GUG)H	0.107006	3.5375	2.01835	2.46231
tV(AAC)H	-0.435138	3.56666	2.19281	2.443
tT(AGU)H	0.189538	3.24747	2.05215	2.38769
tS(AGA)H	-0.434749	3.91598	2.25377	3.02184
tQ(UUG)H	-0.36435	3.05936	1.56198	2.14821
tA(AGC)H	-0.345108	3.50087	1.99382	2.35585
tF(GAA)H1	-0.257097	3.25083	1.87957	2.45648
tF(GAA)H2	-0.241109	3.1043	1.58799	2.23742
tP(UGG)H	0.15139	3.69434	2.20657	2.59133
tT(UGU)H	0.546756	3.78723	2.39713	2.73712
tV(CAC)H	-0.813205	3.17734	1.63428	2.19883
tT(AGU)J	-0.0628685	3.87812	2.48048	3.01133
tE(UUC)J	-0.0140139	3.1431	1.92486	2.2942
tA(AGC)J	-0.302925	2.93725	1.70083	2.0905
tD(GUC)J1	-0.430247	2.62436	1.27419	1.86797
tR(ACG)J	-0.258429	3.51939	1.7785	2.31543
tY(GUA)J1	-0.522831	3.26825	1.69522	2.11377
tR(UCU)J1	-0.863996	2.5397	1.32617	1.75943
tD(GUC)J2	-0.676589	3.25541	1.75203	2.49161
tD(GUC)J3	-0.350681	2.89374	1.56018	2.07301
tR(UCU)J2	-0.413019	2.43663	1.31445	1.56882
tV(AAC)J	-0.205755	2.45721	1.46645	1.74486
tM(CAU)J1	0.155415	2.88292	1.55114	1.85215
tG(GCC)J1	-0.691532	2.81783	1.46642	1.82109
tK(CUU)J	-0.181912	3.80593	2.21471	2.73237
tW(CCA)J	0.141385	3.24569	1.99964	2.49846
tM(CAU)J2	-0.296001	3.09722	1.49346	2.00781
tL(UAA)J	0.471327	2.82002	1.63852	1.93811
tM(CAU)J3	0.0660472	2.24276	0.950519	1.3923
tS(AGA)J	-0.748257	2.91663	1.55691	1.95892
tG(GCC)J2	-0.332314	3.18478	1.75863	2.06109
tR(CCU)J	-0.217428	3.9325	2.26088	2.89084
tD(GUC)J4	-0.801443	3.32673	2.14478	2.53477
tY(GUA)J2	-0.445455	2.8661	1.5261	2.09059
tL(UAG)J	0.504612	3.80408	2.25921	2.97404
tT(CGU)K	-1.29307	3.03129	1.67655	1.95199
tN(GUU)K	-0.274709	3.37579	1.9811	2.47631
tL(UAA)K	-0.167267	3.16362	1.72242	2.15136
tE(UUC)K	-0.121043	2.25644	1.09901	1.61898
tR(UCU)K	-0.585114	3.05814	1.64723	2.17039
tK(CUU)K	-0.257921	2.79941	1.64627	2.0948
tA(AGC)K1	-0.544525	2.19185	1.11562	1.64137
tW(CCA)K	0.257708	4.06734	2.67534	3.15219
tV(AAC)K1	-0.248632	2.65991	1.48916	1.92501
tH(GUG)K	-0.143414	2.28732	1.22651	1.39783
tV(AAC)K2	0.0793595	2.91415	1.73646	2.01231
tL(CAA)K	0.33707	4.04843	2.54071	3.07647
tR(ACG)K	-0.700016	3.82712	2.49526	2.90193
tD(GUC)K	-0.765647	3.4257	1.87728	2.34507
tA(AGC)K2	-0.443855	2.86893	1.40696	1.74507
tK(UUU)K	-0.3559	3.7965	1.97554	2.69244
tP(UGG)L	-0.450897	3.35104	1.77596	2.55703
tS(AGA)L	-0.474248	3.48488	1.914	2.58204
tA(UGC)L	-0.59581	2.87712	1.29039	2.0347
tR(ACG)L	-0.243764	3.20717	1.70982	2.14067
tD(GUC)L1	-0.255908	2.40523	1.4295	1.47348
tQ(UUG)L	-0.448636	2.5168	1.31987	1.60474
tL(UAG)L1	0.331275	3.48233	1.72002	2.27183
tI(UAU)L	-0.512617	3.43243	1.68752	2.31807
tL(CAA)L	0.370242	2.91048	1.54998	2.14593
tA(AGC)L	-0.287611	3.70095	1.84376	2.08008
tV(AAC)L	0.288951	2.37447	1.30306	1.66351
tL(UAG)L2	0.551051	2.85798	1.41431	1.8327
tI(AAU)L1	-0.442664	3.11278	1.47777	1.87619
tS(GCU)L	-0.45315	3.75538	1.90552	2.50661
tD(GUC)L2	-0.81694	2.31858	1.11023	1.56099
tE(UUC)L	-0.000575	3.47943	1.98163	2.26951
tR(CCG)L	0.397486	3.71281	2.11022	2.43386
tK(UUU)L	-0.316524	4.03731	2.22334	2.92583
tL(UAA)L	-0.752199	3.3898	1.56944	2.15841
tN(GUU)L	-0.679081	3.26268	1.91099	2.16885
tI(AAU)L2	0.278238	2.99956	1.85385	2.05586
tR(UCU)M2	-0.128836	2.93505	1.59121	2.21958
tY(GUA)M1	-0.397528	3.45658	1.81218	2.41631
tG(GCC)M	-1.08069	3.06174	1.88707	2.04338
tP(UGG)M	-0.905328	3.2308	1.75499	2.17665
tS(AGA)M	-0.347902	3.42381	1.94119	2.46929
tE(UUC)M	-0.275658	2.50698	1.07763	1.45391
tA(AGC)M1	-0.406152	3.41833	1.92708	2.37341
tF(GAA)M	0.101049	4.94764	2.48428	3.22321
tH(GUG)M	0.143676	3.25966	2.04529	2.31554
tV(AAC)M1	-0.2202	2.68263	1.44552	1.80119
tW(CCA)M	0.0727981	3.07694	1.8105	2.2132
tV(AAC)M2	0.0573311	3.16541	1.78773	2.30227
tD(GUC)M	-0.681874	3.8587	2.35682	2.96907
tK(CUU)M	-0.903225	2.48994	1.43858	1.81262
tL(CAA)M	-0.0414018	3.56415	2.2719	2.53073
tM(CAU)M	-0.3243	3.18448	1.95127	2.28139
tV(AAC)M3	-0.3052	3.17069	1.66477	2.16307
tR(UCU)M1	-0.571976	3.17197	1.79514	2.41853
tA(AGC)M2	-0.387256	2.51318	1.07003	1.60092
tQ(CUG)M	0.503815	2.55585	1.14351	1.63336
tY(GUA)M2	-0.39812	3.72205	2.46443	2.73494
tG(UCC)N	-0.303778	3.04999	1.75739	1.9831
tN(GUU)N1	0.0575527	3.12171	1.88096	2.09025
tT(AGU)N1	0.728992	2.94799	1.53122	2.00675
tF(GAA)N	-0.385704	3.73265	1.69976	2.65887
tL(CAA)N	0.301006	3.45666	2.32867	2.81553
tD(GUC)N	0.476659	3.47016	2.1764	2.73073
tP(UGG)N1	-0.250797	3.52548	2.06675	2.64817
tT(AGU)N2	-0.329284	2.56946	1.53487	1.93078
tP(UGG)N2	-0.47816	3.8715	1.99778	2.90063
tI(AAU)N1	-0.74407	3.05482	1.55994	2.02147
tI(AAU)N2	-0.477555	2.54994	1.21997	1.63142
tP(AGG)N	-0.567128	2.95471	1.5961	1.79489
tN(GUU)N2	-0.373681	3.44942	1.97772	2.55049
tL(UAA)N	-0.25271	3.49414	1.91904	2.51663
tG(UCC)O	-0.925139	3.13187	1.88981	2.31591
tT(AGU)O1	-0.685308	3.98592	2.17221	2.86415
tG(GCC)O1	-0.807325	2.70473	1.63239	1.90209
tN(GUU)O1	-0.0118892	3.27863	1.94968	2.24836
tS(GCU)O	-0.801453	3.56238	1.96102	2.57768
tG(GCC)O2	-1.00293	3.12381	1.44121	2.23026
tY(GUA)O	-0.0318213	2.77203	1.45046	2.02846
tP(UGG)O1	-0.370173	3.85644	2.02009	2.89376
tR(ACG)O	-0.688155	2.33675	1.20063	1.81129
tT(AGU)O2	-0.500484	3.01763	1.96185	1.99391
tK(UUU)O	-0.310002	3.90891	1.90618	2.73471
tP(UGG)O2	-0.499113	4.0235	2.21381	2.88398
tN(GUU)O2	0.0959405	3.62479	2.04603	2.33639
tD(GUC)O	-1.0245	3.46075	1.88816	2.58543
tG(CCC)O	-1.10188	3.41383	1.41286	2.16236
tV(AAC)O	-0.146103	2.72523	1.57223	1.98731
tM(CAU)O1	-1.04804	3.62236	2.01634	2.24982
tA(UGC)O	-0.34913	3.06154	1.44738	2.01973
tM(CAU)O2	-0.533766	3.00956	1.42724	1.66152
tP(UGG)O3	-0.477143	3.28915	1.61235	2.51583
tW(CCA)P	0.223028	3.11312	1.87159	2.22784
tE(UUC)P	-0.306832	3.47413	2.04278	2.29665
tM(CAU)P	-0.805418	3.53593	1.75013	2.37197
tC(GCA)P1	-0.495686	3.04535	1.68684	2.00326
tF(GAA)P1	-0.274845	3.45235	1.78192	2.56594
tG(GCC)P1	-0.385351	3.29436	1.7786	2.21656
tK(CUU)P	-0.662105	3.20025	1.91155	2.20418
tF(GAA)P2	-0.4421	2.82471	1.484	2.16953
tS(UGA)P	-0.288061	3.8914	2.00555	2.67779
tT(UGU)P	-0.316668	2.83671	1.30875	1.70452
tK(UUU)P	-0.372746	3.80376	2.01966	2.75066
tC(GCA)P2	-0.546767	2.86235	1.73118	1.98856
tN(GUU)P	-0.883669	3.39164	1.88924	2.33548
tI(AAU)P1	-0.384514	2.84708	1.30486	1.74209
tA(AGC)P	-0.364988	3.27805	1.88012	2.03978
tG(GCC)P2	-0.358948	2.23471	0.895301	1.24426
tI(AAU)P2	-0.158292	3.04919	1.89858	2.13668

## Sheet: Occupancy by NDR length
Name	Length	Rsc1	Rsc2	Hmo1
YOR234C	596	2.79299	1.92724	5.5474
YMR143W	592	3.22745	2.20733	5.05142
YEL034W	568	2.8133	1.88293	1.11238
YIL055C	566	3.02091	2.18223	1.11757
YJR123W	563	2.43871	1.71716	5.15093
YOL039W	561	2.69647	1.98434	4.03375
YDR309C	551	2.64508	1.64035	0.705485
YOR096W	545	3.20585	2.2293	4.44602
YGR214W	543	2.66947	1.93605	5.0744
YLR406C-A	537	3.08889	2.29229	4.7668
YBL029C-A	524	3.12438	2.1986	1.48172
YBR157C	524	2.15484	1.56689	1.38276
YJL130C	514	2.04678	1.664	1.07075
YPR149W	513	1.81772	1.57586	1.86459
YJL189W	512	3.00545	2.21546	5.36348
YJR127C	512	2.7235	2.00324	1.08343
YDL082W	511	2.76336	2.50685	5.47078
YEL007W	508	2.37244	1.19591	1.66402
YDR072C	507	3.25389	2.37464	1.81107
YBR084C-A	506	2.73439	1.93377	5.2615
YER177W	504	2.72318	1.78584	1.43579
YGR055W	503	3.06661	2.35763	1.79593
YOR107W	502	2.90405	2.12499	1.83912
YNL190W	502	2.24197	1.96488	1.21106
YNL144C	502	2.96636	2.22496	1.17352
YKL060C	496	2.58411	1.99585	2.00492
YDR275W	495	2.80175	2.21107	1.62275
YER158C	493	3.0402	2.13534	0.526532
YPR036W-A	490	2.43425	1.69624	2.01766
YGL056C	489	2.98173	2.29035	1.6077
YGR204W	487	3.09906	2.40345	1.01917
YOR212W	486	2.33404	1.75119	2.1936
YGL031C	484	2.41757	1.68408	5.67307
YHR010W	483	3.11158	2.22069	4.91972
YKL006W	481	2.40201	1.81636	5.60014
YGL253W	478	2.98971	2.22483	0.627456
YAL005C	478	2.34647	1.28558	0.19485
YAL053W	478	2.38267	2.14242	-0.181368
YGL036W	475	2.96873	2.14283	0.0886034
YBL042C	474	2.70924	1.92214	1.9541
YKL182W	474	2.7475	2.13894	1.2173
YNL065W	473	2.10587	1.49111	1.56638
YPR080W	473	2.66423	1.94582	0.244536
YOR062C	464	2.55558	1.67184	0.857461
YFL016C	464	3.04517	2.1899	0.76252
YJL178C	463	2.97548	2.20524	4.62546
YBL028C	462	2.2571	1.68158	5.58863
YMR307W	459	1.80186	1.21561	0.789589
YBR118W	458	2.31818	1.75235	1.68815
YIL052C	452	3.01516	2.18227	5.34736
YLR055C	451	3.40315	2.55833	0.999978
YML064C	450	2.58142	1.91624	5.68692
YER145C	449	2.38854	1.9083	3.33955
YBR069C	448	2.37324	1.72484	1.91669
YCL042W	446	2.99286	2.21392	0.0967747
YLR048W	445	2.22019	1.51531	6.59515
YHR203C	445	2.47206	1.74003	5.09255
YNL069C	444	2.48733	1.64615	5.21532
YKL032C	444	2.64299	2.00542	1.03147
YIL069C	443	1.89795	1.43087	5.06186
YBR196C-A	441	1.53727	1.3728	0.77464
YHR071W	440	3.13702	2.52858	0.96159
YKL201C	440	2.87707	2.03608	0.710606
YBR106W	439	3.80603	2.94213	0.195435
YER036C	439	2.61759	2.00649	-0.482516
YJR145C	436	2.62323	1.68796	5.63872
YEL044W	435	2.80179	1.83963	0.681791
YLR332W	434	2.58991	1.66467	1.30393
YOR317W	434	2.35982	1.90076	0.543812
YGR086C	433	2.86048	1.84232	1.01251
YMR135C	431	3.29618	2.33085	1.33215
YIL119C	429	1.82836	1.53546	-0.0724545
YER017C	427	2.4528	2.13264	1.01368
YNL097C-B	426	2.27668	1.68483	4.2513
YLR185W	425	2.50483	1.73154	6.15881
YIL018W	423	1.70483	1.55974	5.6524
YMR242C	423	3.10573	2.22156	5.28906
YLR249W	423	1.65771	1.30524	1.00759
YEL009C	420	2.25475	1.66365	1.26855
YPL143W	419	2.81097	2.24612	5.68152
YER117W	419	2.5643	1.86	5.57202
YNL066W	418	2.29027	1.62446	1.94529
YBL071C-B	414	2.51675	1.68834	4.91681
YPL111W	412	3.177	2.1367	1.34743
YER102W	411	2.45537	1.86891	6.095
YLR448W	411	2.86259	2.1703	5.86216
YFL039C	411	2.58246	2.17904	0.422895
YGR118W	410	2.28692	1.41845	5.5315
YDL133C-A	410	2.4137	1.7457	2.64054
YML073C	409	2.3279	1.4905	5.7167
YMR296C	409	3.23268	2.58613	1.29285
YLR403W	409	2.81011	2.04663	0.20917
YPL117C	408	0.0566664	1.67077	0.756246
YIL133C	407	2.58235	2.00939	5.51197
YML026C	407	2.17969	1.53136	5.4168
YDR043C	407	2.23969	1.51405	1.73762
YDR025W	406	2.48743	1.87108	5.19768
YDR487C	403	2.42187	1.74817	1.98172
YDR044W	402	2.44137	1.74067	1.45744
YGR180C	400	2.8755	1.96577	1.71014
YNL037C	400	3.04155	2.64836	-0.707513
YGL189C	399	2.55901	1.6576	5.73671
YNL149C	397	3.55912	2.71489	1.36809
YER092W	397	2.71077	1.94634	0.723012
YPR102C	396	3.62273	2.91619	0.720797
YGR148C	395	2.80448	1.97043	6.15362
YOR312C	393	2.28844	1.47252	5.77251
YOL125W	392	3.32917	2.60596	1.37951
YDR276C	389	3.00246	2.14575	1.29187
YFL033C	389	3.04062	2.12467	-0.0980679
YNL302C	388	2.95485	2.10824	6.27814
YLR304C	388	2.60856	1.59986	0.485593
YPL058C	386	2.65796	2.00738	1.56245
YNL231C	386	3.22098	2.40813	1.035
YDR471W	385	2.6993	2.08857	5.80874
YNL162W	383	3.22788	2.36014	6.13497
YLL028W	381	2.87172	2.11518	2.83823
YDR447C	381	2.91504	2.1051	2.46455
YOL060C	381	3.00082	2.10268	-0.350191
RUF23	380	2.06477	1.27568	5.77751
YOR028C	380	3.10903	2.07729	0.780778
YGR090W	377	3.0458	1.81824	4.09147
YBR183W	374	2.51384	1.89526	1.90187
YBR077C	374	2.95464	2.08854	1.3749
YML007C-A	374	3.13507	2.33448	-0.0293021
YDR211W	374	3.13704	1.63484	-0.71363
YPR145W	372	2.76243	1.9837	2.34437
YBR203W	372	3.01813	1.97839	1.91146
YHL027W	372	2.31834	1.61261	0.117953
YKL180W	371	2.55928	1.7343	5.85181
YDR174W	370	2.50962	1.75155	4.56267
YBR238C	370	2.51648	1.72085	1.34746
YLR312C	370	3.42036	2.57404	0.867152
YML121W	370	1.44525	1.21372	0.787793
YER056C-A	368	3.38027	2.5668	6.07135
YOR182C	368	2.97009	2.21697	1.32138
YLR256W	367	3.01775	2.07255	1.52944
YER062C	367	2.6602	2.03378	1.00813
YFR032C-B	364	2.79387	1.92315	2.32094
YIL057C	364	3.35391	2.55235	1.9694
YDR011W	363	3.2881	2.54134	1.32979
YER168C	362	3.51716	2.62343	-0.662469
YGR279C	360	3.03531	2.22003	1.74012
YIR017C	360	2.3729	1.56918	1.05897
YKL068W-A	360	2.71617	1.87475	0.981372
YLR399C	360	3.08467	2.14941	0.702733
YOR293W	357	2.95694	1.98317	5.52779
YMR291W	357	2.61124	1.83698	1.33673
YCL018W	357	2.3994	1.38598	0.0128255
YEL060C	357	3.16064	2.37278	0.00313418
YML018C	356	2.12426	1.57444	0.978992
YJL088W	354	3.41602	2.3759	0.617221
YPL189C-A	354	3.299	2.23202	-0.410976
YOR153W	353	2.01248	1.37756	2.82848
YBR181C	351	3.16714	2.12127	4.86899
YOR101W	351	2.12084	1.8937	1.59748
YER074W	350	2.99645	2.16773	5.47556
YHR141C	349	2.68569	1.74601	6.24827
YOR098C	349	3.35829	2.65352	0.254299
YGL147C	348	2.23304	1.62584	1.82727
YGR241C	347	3.31687	2.48392	1.01316
YLR328W	347	3.31416	1.75465	-0.146339
YLR437C	343	4.08667	2.47908	1.26897
YER056C	342	2.10836	2.25775	0.77914
YER069W	341	2.31832	1.66478	1.09995
YNL096C	340	3.32018	2.32082	4.0211
YBR021W	340	2.39631	1.58616	1.32274
YKR080W	339	2.55389	1.75244	-0.491494
YPR131C	337	3.18844	2.32721	5.11965
YLR150W	337	2.01801	1.36853	1.73623
YGL076C	337	1.9963	1.17368	1.62347
YKR042W	336	3.12158	1.84213	0.710898
YIR016W	336	3.32953	2.58124	-0.10865
YLR342W	334	1.99538	0.843617	1.19163
YLR094C	334	3.03464	2.07956	0.165341
snR52	333	2.64864	1.67817	0.474367
YOR246C	333	2.64926	1.83367	-0.397066
YER131W	332	3.43868	2.55345	1.69185
YNL118C	330	3.62851	2.82399	1.1929
YGL123W	329	3.68664	2.75424	1.41153
YIL121W	329	2.91179	2.18037	0.211324
YGR240C	327	-0.216148	0.973952	-0.0728982
YJL136C	326	2.58108	1.53905	5.41881
YDR161W	326	0.476017	1.12976	-1.21375
YOR051C	325	1.95005	1.44718	1.49469
YPL170W	325	2.64139	1.9853	0.287017
YIL122W	324	2.37412	1.57464	1.0417
YBL032W	324	3.95292	3.46371	0.0299457
YML092C	324	-0.083546	-0.378075	-0.455994
YOR161C	323	2.71183	1.90894	3.47411
YLR074C	323	2.22645	1.54719	2.3538
YML035C	322	2.08697	1.35598	0.962413
YGR229C	321	2.41139	1.52107	0.888052
YPR138C	321	2.90216	2.17358	0.161134
YMR122W-A	319	2.431	1.79106	2.32634
YLR130C	319	1.65084	1.06947	0.512023
YOR274W	318	3.23861	2.53796	1.84225
YJR094W-A	318	2.83672	1.87596	0.750758
YML058W	318	3.22548	2.18862	0.511558
YCR011C	317	2.76572	2.03346	1.30603
YOL136C	317	2.40953	1.48261	-0.0497319
YDR490C	317	3.38645	2.78648	-0.0620659
YHR096C	316	3.22342	2.39305	0.595721
YPL131W	315	2.83049	1.74118	1.55191
YHR150W	315	3.40459	2.38413	0.642571
YPL017C	314	3.70767	2.80366	-0.596198
YOR001W	313	-0.805715	-0.678683	0.654173
YDL136W	311	3.2551	2.32225	1.69356
YBR048W	310	3.31682	2.32796	4.7742
YLR344W	310	2.8617	1.87955	3.79642
YLL045C	310	2.13405	1.95968	1.45254
YDL184C	309	3.27643	2.18475	1.41379
YLR297W	309	2.7929	1.95563	1.22049
YDL170W	309	2.69789	2.14043	0.653121
YIL106W	307	1.45847	1.93859	2.7152
YNL079C	307	2.54294	2.04258	0.300689
YER046W	306	1.92603	1.43037	1.4965
YER035W	305	2.64645	1.90961	0.346225
YHR206W	305	3.51142	2.66318	-0.176294
YDR450W	304	3.32097	2.28318	4.58131
YOR369C	303	2.95316	2.02998	2.08077
YAL029C	303	1.3186	2.25853	1.57978
YDR452W	303	3.00079	2.1993	0.993577
YBL087C	302	3.08029	2.01912	0.96547
YFL022C	300	2.3886	1.70178	0.457181
YKL007W	299	3.12532	2.16711	0.426113
YGL206C	299	1.74639	2.06968	0.0356746
YLR325C	298	3.26911	2.30997	1.54363
YMR041C	298	3.98423	2.00986	0.186369
YJL133W	298	3.84718	3.01145	0.162286
YBR119W	297	0.722611	0.0127455	1.13933
YDR152W	297	2.77667	2.08995	0.273658
YFR032C	297	0.311555	0.300142	0.1367
YLR388W	296	3.12255	2.30906	2.26419
YNL178W	296	2.29599	1.51801	1.86176
YOR147W	296	2.15988	3.04595	0.843489
YJR101W	296	3.20491	1.94257	0.508678
YGR169C-A	296	2.50987	2.48988	-0.595307
YKR090W	294	1.51528	2.93086	1.52754
YBR150C	294	3.3663	2.28676	0.436431
YOL021C	293	1.9314	2.28955	0.759291
YGL013C	293	3.28622	2.46931	-0.300636
YOR326W	293	3.25344	2.62484	-0.868577
YPR159W	292	3.68453	2.63214	0.659192
YMR119W	292	2.82983	1.93219	0.0343113
YOL121C	291	3.27402	2.05157	0.894491
YBR162W-A	290	2.73371	2.06556	-0.0897903
YPR005C	289	1.76101	1.32898	2.37567
YPL081W	289	2.13705	1.40226	1.18548
YBL044W	289	3.21313	2.37176	1.04377
YOR268C	288	4.04287	3.14415	1.92687
YAL039C	288	2.43031	1.34622	0.3615
YKL015W	288	2.75406	2.19712	-0.875578
YBL092W	287	2.24366	1.71126	6.44511
YJL026W	287	2.71876	1.85783	1.31705
YPR043W	287	3.10559	1.99142	1.26808
YDL191W	286	2.96202	2.08495	3.72371
YHL016C	285	2.97939	2.44697	2.32022
YDR389W	285	2.02953	1.39417	1.92835
YHR005C-A	285	2.50917	1.46836	0.301112
YLR018C	285	0.431422	2.09776	-0.744827
YML101C	284	2.82413	1.90798	1.84317
YOL120C	284	3.54383	2.59395	1.73105
YLR226W	284	2.52021	2.77876	0.483525
YBR082C	281	2.62945	2.24828	0.972985
YBL030C	280	2.70964	2.24097	1.53135
YLR023C	280	3.52049	2.50092	0.810474
YGR031C-A	279	2.91663	2.1861	0.962064
YJL158C	278	2.98931	1.95077	2.36088
YGL103W	278	3.45005	2.3125	1.63317
snR11	278	1.69486	1.40504	1.60371
YOR010C	277	2.18648	1.51915	1.12716
YPR008W	277	2.39454	1.27888	0.682223
YPL135W	276	3.63887	2.85622	1.17406
YDR234W	276	3.82776	3.02126	0.960078
YBL011W	276	2.67868	1.74802	0.908803
YLR264C-A	276	2.67946	2.17603	0.496367
YGR079W	276	3.1953	2.28052	-0.056642
YGL145W	276	3.20376	2.98491	-0.451861
YMR314W	275	0.661012	3.03963	-0.735179
YER075C	274	2.41904	1.67765	0.818455
YJL141C	274	2.16285	1.49244	-0.0883672
YHL033C	274	-0.369252	1.11684	-0.442729
YJL192C	273	3.3149	2.37131	2.14797
YGR240C-A	273	2.1083	1.81144	0.836832
YKL056C	273	0.900605	1.41489	0.455524
YLL025W	273	2.33864	1.22821	-0.369225
YBL002W	272	2.43851	1.72578	1.48962
YDR188W	272	3.12701	2.43079	0.379943
YOL140W	272	2.1086	1.64139	0.0254382
YBR049C	271	2.6221	1.93026	0.824875
YJL200C	271	3.07728	1.98475	0.196832
YIR033W	271	3.03058	2.6112	-0.0913978
YFL024C	271	3.88599	3.04265	-0.44709
YGL209W	270	2.34928	1.56712	0.0422922
YCR031C	269	3.0735	2.14388	4.01542
YPL015C	269	3.17887	2.3852	3.70847
YGR014W	269	2.7688	2.01472	1.47471
YEL054C	268	2.15609	1.36871	6.04575
YPR074C	268	2.80488	1.99222	0.534321
YBR133C	268	4.1018	3.141	-0.570747
YLR441C	267	4.33984	2.79906	1.94008
YOR349W	266	2.32092	1.61458	1.24262
YER028C	266	2.22224	1.25559	0.702774
YBR161W	266	2.33939	1.78312	-0.114138
YOR327C	265	2.6279	1.76236	0.396417
YHR193C	265	1.434	3.18274	-0.615251
YDL061C	264	3.76196	2.70481	1.07653
YGL219C	264	1.94785	2.38993	0.613114
LSR1	264	2.89828	1.98867	-0.677624
YIL118W	263	1.58826	1.38449	1.27244
YPL232W	263	1.82226	1.25809	1.15811
YHR137W	263	3.83631	2.66601	0.10977
YCR084C	263	3.53664	2.7758	-0.31432
YDR500C	262	4.36177	3.69647	2.74962
YGL225W	262	2.72245	1.78683	-0.642344
YLR179C	261	3.30587	2.23694	0.960949
YEL063C	261	3.29385	2.37289	0.735558
YOR023C	261	2.31176	1.77573	0.453524
YBR279W	261	0.410286	2.99593	-0.31624
YDR064W	259	2.63465	1.87836	1.43239
YGL158W	259	2.20783	1.05788	0.524188
YLR333C	258	2.61866	1.70956	3.24941
YMR031C	258	3.13828	2.01158	0.750784
YMR172W	258	3.78665	2.83784	0.738414
YKL104C	258	2.18335	1.20999	0.466513
YHR144C	258	3.25028	1.84887	0.177745
YCR073C	258	2.96024	2.26555	-0.79377
YDR418W	257	2.98498	2.18956	5.89514
YDR524C	257	1.49929	1.61133	3.82436
YGR203W	257	1.78935	1.84799	2.12157
YNR013C	257	2.35159	1.49839	0.932816
YLR029C	257	2.07746	1.73425	0.763344
YLR007W	257	2.79822	2.27211	0.0532471
YLR301W	256	2.27843	1.53512	0.526809
YCR107W	256	-0.3917	-0.872701	-0.000679688
YKR025W	256	0.581421	2.69855	-0.847814
YKL171W	256	2.64492	1.87867	-0.953431
YBR177C	255	2.40162	1.89139	0.358024
YHL007C	255	3.23283	2.10624	0.185861
YFR029W	255	2.56516	1.4769	-0.513759
YNL172W	254	2.3854	1.75383	0.668516
YMR146C	253	1.68691	1.18727	0.223334
YML051W	253	1.11139	0.655981	-1.08691
YGL035C	252	2.8054	1.78722	2.16555
YGR157W	252	2.14308	1.63485	1.35567
YOR047C	252	2.29028	1.72485	0.449392
YOL054W	252	2.86136	1.78839	0.079723
YGR027C	251	3.30787	2.54281	1.43993
YIL131C	251	1.60802	2.65309	1.3008
YMR302C	251	2.97416	2.44056	-0.314288
YHL001W	250	3.04383	2.0325	0.958123
YLR355C	249	2.70736	1.80829	2.96705
YLR412C-A	249	2.4869	1.70456	2.42814
YNL234W	249	2.28308	1.30596	0.0557727
YMR305C	249	3.3518	2.27569	0.0523867
YKR074W	249	3.29658	1.73232	-0.208659
YMR013C	249	2.73318	2.18337	-0.723177
YPL082C	248	2.90639	2.08899	1.81021
YBL039C	248	2.86993	2.68264	1.31903
YPL199C	248	2.93222	1.97871	1.26511
YDR506C	248	2.73563	1.75097	0.474369
YDR061W	248	1.59913	1.2136	0.103527
YPL231W	247	2.43169	2.0358	0.835236
YOR092W	247	2.82304	2.05947	0.662695
YDR357C	247	1.80736	2.11771	0.576881
YJL020C	247	0.213174	2.02729	-0.813453
YDL130W	246	3.31332	2.19297	1.72081
YEL027W	246	1.80194	1.67575	0.392776
YPL055C	245	3.40275	2.45353	1.58248
YOR063W	245	1.61341	1.07854	0.616754
YDR334W	245	1.88042	1.09633	0.57662
YJR110W	244	1.84505	2.30925	1.03848
YLR153C	244	2.34832	1.64989	-0.0721701
YDL231C	244	2.24898	2.8655	-0.308898
YLR061W	243	2.65271	1.66593	2.75194
YJR063W	243	1.51131	2.38924	0.671451
YNL251C	243	2.88331	1.89434	-0.01603
YOR157C	243	3.27695	2.4969	-0.211409
YMR240C	242	3.77691	3.08657	-0.336461
YGL190C	241	-0.574663	0.851373	1.2233
YHR064C	241	1.91983	1.50371	1.10791
YHR047C	241	2.28068	1.37143	0.204664
YHR022C-A	240	1.57429	0.926388	1.49183
YBR059C	240	2.58884	1.90192	1.00501
YGR281W	240	2.75189	2.05813	0.836955
YGR034W	238	2.7247	1.54351	2.03257
YJR120W	238	3.30155	2.40956	1.54254
YBR189W	238	2.87034	1.80404	1.12259
YDL125C	238	1.99566	1.51298	1.06505
YFR039C	238	0.738605	2.37746	0.934363
YLR372W	238	1.92052	1.38541	-0.0689567
YDL111C	238	1.35311	1.2175	-0.318357
YGR085C	237	3.19228	2.23703	2.60536
YJR113C	237	1.77725	1.58385	0.801695
YER130C	237	2.27809	1.61415	0.792154
YMR272W-B	237	3.16647	1.99382	0.687051
YMR284W	237	2.77795	1.94962	-0.199372
YFR011C	237	2.34201	1.32025	-0.412308
YJL159W	236	2.35892	1.6141	1.93429
YKL052C	236	2.58785	2.0346	0.538114
YML008C	236	0.126449	0.653936	-0.301096
YKR094C	235	3.34096	2.53946	1.75375
snR3	235	1.79583	1.16071	0.668402
YPR127W	235	2.67763	1.79834	0.519031
YKL023W	235	1.07038	2.82679	-0.391169
YPR184W	234	3.16551	2.23586	-0.549104
YDL224C	233	1.68068	1.27114	1.16072
YGR198W	233	1.88601	1.46537	0.298855
YLR264W	233	2.15411	1.6149	0.265247
YNL186W	233	2.93848	2.12049	-0.258606
YKL156W	232	2.52063	1.73614	1.70512
YHR210C	232	2.34855	1.81278	0.263707
YDL229W	231	1.98197	1.50343	0.688569
YER125W	231	2.64643	1.811	-0.148559
YOR298C-A	230	2.43111	1.84853	-0.161203
YOL025W	230	2.98598	1.59413	-0.715557
YMR108W	229	2.72775	1.9933	1.76388
YLR189C	229	2.29781	1.76605	1.45432
YHR179W	229	2.31312	1.77012	0.884948
snR8	229	2.2654	1.41921	0.695265
YDR363W-A	229	1.83393	1.29452	0.649554
YGR287C	229	1.39019	0.846263	0.477535
YJR091C	229	2.73783	2.00347	0.227295
YCL063W	228	2.46695	0.960088	2.21866
YGL135W	228	3.21057	2.16225	1.76674
YDR074W	228	1.817	1.27262	1.75471
YNL277W-A	228	1.71383	0.875361	1.35187
YML091C	228	3.22701	2.43627	0.539502
YCR061W	228	2.72639	1.80813	0.160389
YOL019W-A	228	2.12714	1.15348	-0.171361
snR45	227	1.40397	1.68204	1.07521
YLR220W	227	3.34012	2.41275	0.385696
YDR381C-A	227	1.66459	1.62088	0.0144837
YHR021W-A	226	2.52243	2.44498	5.58831
YPL079W	226	2.69584	1.80353	1.86845
YNL006W	226	2.66607	2.12818	0.733056
YOR064C	226	3.59537	2.56628	0.569927
YMR230W	226	3.40762	2.64012	0.2086
YOR078W	226	2.55596	1.78939	-0.136074
YHR078W	225	0.816413	1.20145	1.77491
YFL021W	225	3.53731	2.71776	1.04404
YNL280C	225	1.99762	1.27334	0.456478
YIL111W	225	0.923026	0.903743	0.154849
YIL117C	225	2.57199	1.78978	0.136179
YPL128C	225	2.23915	2.40708	-0.275807
YOR356W	224	0.783393	0.52489	1.09522
YGR162W	224	2.379	1.51045	0.572737
YNL111C	224	2.49817	1.9021	0.0811018
YDL095W	224	2.34611	1.69186	-0.152155
YMR102C	223	2.83284	2.2127	3.54724
YDR381W	223	1.93275	0.923734	0.39073
YJR119C	223	1.50804	1.15423	0.274914
YKR057W	223	-0.383745	1.61103	-0.425353
YLR167W	222	2.70085	1.77899	2.11941
YER070W	222	1.9294	1.16564	1.58836
YMR186W	222	1.99049	1.19728	0.282732
YLL027W	221	2.06835	1.49317	0.478448
YBR056W	221	3.08959	1.97872	0.373472
SRG1	221	2.8817	2.33672	0.175912
YPL212C	221	0.232518	1.30869	-0.0523692
YHR049W	220	2.19754	1.35442	-0.0749986
YNL104C	219	1.43592	1.12203	2.05633
YHR011W	219	0.150258	0.217057	1.53103
YMR001C-A	219	1.925	1.23116	1.34675
YER159C	219	2.41526	1.66186	0.606389
YJL100W	219	2.15837	1.61825	0.49627
YML059C	219	1.44457	1.29732	-0.994836
YKL063C	218	2.39727	1.72588	1.63465
YBR037C	218	0.730524	2.36969	0.937757
YPL075W	218	2.1741	1.46405	0.821191
YPL214C	218	0.822692	1.89223	-0.358068
YER165W	217	1.24824	0.863366	1.97062
YLR134W	217	0.963071	0.450355	1.81953
YJR003C	217	1.46659	1.07054	0.697276
YHR094C	217	2.23947	1.39284	0.607326
YER098W	217	2.24314	1.45039	0.486474
YGR210C	217	3.02826	2.28689	0.318113
YDL202W	217	1.01056	2.30631	0.0482512
YNL142W	217	1.36171	1.02662	-0.414634
YLR197W	216	0.6266	0.855201	2.81374
YIL099W	216	3.09546	2.26234	0.222665
YLR293C	216	2.33742	1.70516	0.0439389
YLR175W	216	-0.546368	0.897987	-1.17506
YBR202W	215	1.98901	1.19723	1.01136
YBR089C-A	215	2.79644	2.1859	0.430137
YER034W	215	2.73078	2.03206	-0.483034
YFL036W	215	2.3249	1.45141	-0.569505
YPR010C	215	1.51291	1.14608	-1.15454
YML053C	214	1.95022	1.35712	1.89359
YNL241C	214	3.03918	1.89904	1.31726
YOR186W	214	1.80375	1.24889	0.684647
YGR047C	214	2.62747	1.96117	0.664511
YOR335C	214	2.442	1.43556	-0.0356757
YOL013W-A	214	3.19501	1.57647	-0.355213
YOR138C	213	3.23451	2.4372	2.46206
YMR086W	213	2.42763	1.74957	1.96075
YBL099W	213	3.61085	2.55697	1.28076
YMR173W	213	1.96307	1.39337	0.514654
YLR454W	212	1.44369	1.22399	1.47982
YPL179W	212	1.69046	1.39783	0.961895
YLR347C	212	2.11013	2.13904	0.495983
YNL053W	212	1.13589	1.38445	0.196243
YLR026C	212	1.3798	1.00328	0.157394
YHR151C	211	3.41136	2.78654	1.03507
YDL052C	211	1.65251	1.33334	0.294876
YIL046W-A	211	1.91964	1.30359	0.041719
YDL020C	211	2.97592	2.30607	-0.11532
YNL112W	211	-0.0495246	1.96341	-0.207739
YGL101W	210	1.33346	0.73683	1.16576
snR6	210	2.01112	1.04401	0.969549
YLR390W-A	210	2.81208	2.53901	-0.0560714
YDR214W	210	2.04784	1.69063	-2.8193
YPL148C	209	1.01568	0.963873	0.666393
YNL217W	209	1.63453	1.03855	0.608363
YPL032C	209	3.18552	2.40457	0.588262
YKL112W	209	1.99375	1.47718	0.501472
YPL242C	209	1.06642	1.11296	-0.0719091
YNL216W	209	2.3789	1.83015	-0.375036
YHL035C	209	0.702188	0.532895	-1.03697
YCR021C	209	-0.993863	0.821955	-1.33369
YOR374W	208	2.52932	1.66584	1.89807
YDL081C	208	1.3465	1.31176	1.7197
YPL273W	208	1.78649	1.0403	0.939402
YMR243C	208	2.80347	1.75205	0.758842
YCR008W	208	2.99242	1.90534	0.105963
YNL068C	207	2.66781	1.86402	1.49038
YPL202C	207	2.42929	1.83025	0.738783
YOL006C	207	1.08043	1.55895	0.349542
YDR158W	207	1.31383	0.917715	-0.0211758
YPL037C	207	2.97395	2.46615	-0.0356715
YDR071C	207	1.89613	1.37418	-0.382833
YPL181W	206	1.74751	1.07969	0.714147
YGL071W	206	2.9388	2.34251	0.673676
YDR101C	206	2.32467	1.43849	0.42999
YKR011C	206	1.32276	0.892587	0.307148
YKR099W	206	2.12445	1.53598	-0.109432
YKL186C	205	2.7136	1.91885	1.09219
YOR272W	205	2.32368	1.68601	0.740245
YOR187W	205	2.19102	1.74054	0.466958
YFL037W	205	2.66347	1.68317	0.355801
YDR023W	205	1.34157	1.0991	0.115591
YOL082W	205	0.988189	0.767527	-0.0192732
YOR173W	205	0.759388	0.582849	-0.291583
YKL093W	205	1.22072	0.6442	-0.752541
YBR240C	204	2.9466	2.32313	1.55044
YBR201C-A	204	2.38569	1.64435	1.41033
YGR065C	204	1.76809	1.21785	0.476495
YDR527W	204	1.53285	1.12432	0.0261608
YOR084W	204	0.540438	0.176867	0.00774951
YBR115C	204	3.35762	2.34606	-0.0416255
YPR137W	203	2.22643	1.52121	1.384
YOR319W	203	2.30557	1.64768	1.0886
YOR083W	203	2.75772	1.80865	0.502008
YOL158C	203	1.53973	1.45476	0.487856
YGR159C	203	2.25735	1.48617	0.147045
YMR144W	203	2.86958	2.22147	0.0293227
YIL126W	203	2.10381	1.357	-0.609533
YGL077C	202	0.483897	0.728113	0.336344
YNL209W	201	1.08871	1.64642	1.16836
YOR360C	201	1.57006	1.23214	0.867059
YML111W	201	1.60129	1.14058	0.590464
YJL052C-A	201	2.63666	1.85141	0.443897
YOR204W	201	0.748436	0.388527	-0.17222
YHR031C	201	1.37083	1.32747	-0.989614
YJL148W	200	2.4884	1.72549	0.764556
YNL067W	200	1.98192	1.4301	0.0450315
YMR185W	199	0.474062	0.398899	0.486645
YEL038W	199	1.9348	1.24164	0.331447
YDL140C	199	1.84563	1.346	-0.268523
YOR230W	198	0.465881	0.873839	1.19474
YKL054C	198	2.71888	2.61734	0.515125
YDR012W	198	1.2541	1.29011	0.437703
YJL166W	198	1.38155	1.09068	-0.0769414
YER112W	198	2.46322	2.08385	-0.859315
YCR012W	197	-0.341871	0.726363	0.930751
YNR028W	197	1.91229	1.24367	0.704328
YKL184W	197	2.64474	1.56454	0.524176
YHR020W	197	3.01974	2.13456	-0.478798
YBR283C	196	3.01117	2.55774	0.184776
YPL220W	196	2.44493	1.87911	0.0339561
YOR054C	196	1.96595	1.15532	-0.0783934
YML102W	196	1.84376	1.29262	-0.211196
YDR002W	196	2.86031	1.69784	-0.302541
YBL064C	196	3.02432	2.11696	-0.618355
YDL137W	195	1.80814	1.35582	0.350254
YDR099W	195	2.55843	2.14052	0.113342
YPR165W	195	1.95678	1.72003	-0.481329
snR128	194	0.975529	0.395319	0.963056
YJR016C	194	1.82146	1.55608	0.788631
YDR297W	194	3.32234	2.33816	0.692564
YOR108W	194	3.00492	2.12556	0.421978
snR7-S	194	1.56845	1.53587	0.248213
YGL040C	194	2.18238	1.70268	-0.0604433
YKL216W	194	2.47318	1.80733	-0.115697
YBR034C	194	0.682613	1.01205	-0.615688
YNR014W	193	2.22529	1.42013	1.51352
YPL004C	193	1.8998	1.34899	1.39473
YOL123W	193	2.60602	1.35201	0.737221
YBR187W	193	2.46743	1.8093	0.732213
YGL006W-A	193	2.232	1.51034	0.384659
YGR092W	193	2.30269	1.48366	0.0967482
YBR025C	193	2.12396	1.42162	0.00287461
YPR036W	192	2.08607	1.44325	-0.0557297
YMR188C	192	2.04769	1.35286	-0.527802
YEL072W	192	0.289507	1.44716	-0.637286
YIL148W	191	2.87495	2.01168	6.23555
YKR092C	191	2.87041	2.05733	1.35773
YMR183C	191	2.54748	1.8576	1.01794
YMR010W	191	1.2202	1.2371	0.886079
YJL025W	191	-0.0619513	0.617731	0.851551
YDR190C	191	1.65862	1.12242	0.49164
YOL091W	191	-2.42892	0.137171	0.228403
YOR270C	191	1.34327	1.18416	0.213052
YOR089C	191	1.56979	1.12721	0.207419
YKL057C	191	-1.05301	0.779465	-0.0496508
YDR037W	191	1.86759	2.53025	-0.0681309
YLL029W	191	2.34343	1.68968	-0.122902
YJL123C	191	1.94462	1.27252	-0.62483
YGL200C	191	2.06632	1.62017	-0.748698
YOR224C	191	0.32032	1.80402	-1.26768
YDL015C	190	-0.990234	1.17233	1.7137
YLR113W	190	1.64499	1.44627	1.1574
YMR044W	190	0.332274	0.873272	1.00099
YDR052C	190	1.30094	1.51654	0.571236
YCR033W	190	1.17553	0.542283	0.337686
YCR067C	190	2.88143	2.66929	0.157423
YGR106C	190	1.71972	1.7108	-0.149828
YML024W	189	2.67606	2.02102	6.56965
YDL076C	189	2.77018	2.02295	5.02556
YDL192W	189	2.1928	1.57532	2.10059
YNL298W	189	2.01163	1.09698	0.209147
YPR054W	189	2.74917	2.3139	-0.329078
YEL026W	188	-0.177784	0.872934	2.39571
YNL064C	188	1.99853	1.76923	1.93701
YGR121W-A	188	1.43772	1.07821	1.07667
YOR044W	188	1.48383	0.820011	1.02623
YCR036W	188	1.38388	1.09331	0.851146
YPL260W	188	1.41773	0.91946	0.424072
YDL147W	188	2.00916	1.58908	0.286519
YFL052W	188	1.30684	0.762168	0.0380085
YMR295C	188	1.91481	1.41963	-0.456532
YMR194W	187	2.18739	1.4966	2.68783
YER002W	187	0.458877	1.29948	2.18744
YPL028W	187	2.24733	1.85535	1.8114
YDL128W	187	1.90718	1.40634	0.620392
YPR112C	187	1.94243	1.24053	0.413334
YDL185W	187	1.58915	0.925288	-0.957308
YGR282C	187	-0.684111	1.35254	-1.02762
YMR304W	186	1.88434	1.2246	1.23738
YDR124W	186	2.35491	1.68556	0.810565
YPL149W	186	1.31475	0.95642	0.299059
YGL157W	186	2.15196	1.66402	0.0216253
YPL092W	186	2.32583	1.65685	-0.00495484
YHR146W	186	1.30684	0.918202	-0.0327349
YER089C	185	1.17476	0.847866	1.25118
YHR143W	185	1.99031	1.36573	1.1888
YKR069W	185	1.53013	1.46122	0.732989
YKL071W	185	0.119382	0.0555238	0.0104638
YKL001C	185	1.21639	0.761629	-0.0173681
YGR280C	185	1.67969	1.11057	-0.163992
YBR014C	185	1.14416	0.86328	-0.28508
YJL143W	185	1.60601	1.07652	-0.92906
YLR084C	184	1.53385	0.999617	2.5437
YKL080W	184	1.79056	1.12514	1.71265
YEL036C	184	1.57347	0.907053	1.33691
YDR231C	184	2.27017	1.71122	1.25726
YOL051W	184	2.04816	1.49337	0.479182
YNL161W	184	2.08911	1.32246	0.369286
YNR019W	184	2.0284	1.36352	0.305228
YBR114W	184	2.15867	1.3442	0.270076
YDR398W	184	1.51667	1.23017	-0.151624
YAL023C	184	1.0941	0.650442	-0.242327
YKL160W	184	-1.64353	1.30561	-0.308703
YFR034C	183	2.43657	1.9309	1.03492
YIL158W	183	1.90583	1.23296	0.596326
YHR050W-A	183	2.83374	2.10303	0.295131
YPL159C	183	1.86842	1.39449	0.239274
YLR375W	183	2.27641	1.91121	-0.0767366
YLR378C	183	2.16123	1.68045	-0.148745
YDL048C	182	1.67215	1.26559	1.47541
YHR084W	182	1.60978	1.19683	0.594988
YJL138C	182	1.56107	1.0442	0.263215
YBR084W	182	1.98787	1.26103	0.153967
YHR143W-A	182	1.18238	0.853256	0.122431
YNL090W	182	2.09439	1.44919	-0.0125396
YOR027W	182	0.869524	1.16908	-0.125477
YDL046W	182	0.283407	0.582574	-0.199644
YMR107W	182	0.239402	0.130751	-0.993134
YMR056C	181	3.29982	2.44268	4.04409
YJL076W	181	1.66564	1.33383	0.876966
YDR404C	181	1.8772	1.5642	0.175041
YER065C	181	2.23851	1.2832	-0.510528
YGL105W	181	0.915198	1.30455	-0.689812
YPR190C	181	1.98195	1.38421	-0.733685
YHR006W	180	1.11025	0.908342	1.05655
YNL103W	180	2.20114	1.73671	0.919031
YOR236W	180	1.26962	0.723759	0.637097
YGR205W	180	1.24619	0.712457	0.550231
YJL194W	180	2.44657	1.61829	0.352336
YHR128W	180	2.26145	1.9038	0.332144
YGL116W	180	2.14391	1.38881	0.323333
YBL041W	180	1.84171	1.43004	0.279294
YER043C	180	2.92353	1.82005	-0.131241
YMR002W	180	1.851	1.42659	-0.38461
YML012W	180	1.32001	0.774594	-0.501363
YLL010C	180	2.83461	2.10502	-0.634054
YIL094C	180	1.01494	1.48209	-1.35828
YLR340W	179	2.22792	1.62252	3.72555
YMR071C	179	1.73033	1.28011	1.68409
YHR052W	179	0.828634	0.929179	1.21095
YDR006C	179	3.09313	2.06652	1.19744
YER068W	179	1.90615	1.3836	0.557304
snR19	179	0.756805	0.759982	0.553846
YJR058C	179	2.27988	1.93538	-0.0356553
YLR254C	179	1.18248	0.811804	-0.190986
YEL042W	179	-1.85458	0.341153	-0.465467
YJR104C	178	2.48241	2.17739	1.51424
YDR086C	178	1.99871	1.19158	0.934291
YPL207W	178	1.88629	1.42048	0.344597
YOL113W	178	0.976672	0.63344	0.291929
YDR359C	178	2.235	1.81264	0.210798
YJL111W	178	0.958551	0.687464	0.128463
YOL045W	178	1.91951	1.22627	-0.823678
YDR346C	178	1.62937	0.915039	-0.833435
YBR191W	177	2.08792	1.29416	6.32402
YDR155C	177	1.93069	1.15291	1.9904
YJL042W	177	2.00244	1.54546	1.64772
YBR143C	177	2.25238	1.87904	1.6472
YGL038C	177	2.37776	1.70949	0.74333
YDR184C	177	0.239038	0.870772	0.574112
YJL098W	177	1.94282	1.22585	0.20229
YOR310C	177	1.14131	0.74358	0.120153
YPL237W	177	1.75429	1.54316	0.107168
snR10	177	1.83381	1.6804	0.0443294
YNL042W	177	1.1209	0.819384	0.0324831
YPL126W	177	2.31407	1.81323	-0.214512
YNR053C	177	1.73995	1.35535	-0.269455
YNL002C	176	1.09466	0.908484	1.90909
YOR071C	176	2.05309	1.51503	1.09119
YER052C	176	1.72849	1.39986	0.987316
YOR008C	176	2.00452	1.33211	0.814741
YDL181W	176	3.3398	2.60209	0.730665
YLR108C	176	2.28224	1.43749	0.670045
YOL004W	176	2.00082	1.21392	0.527994
YOR095C	176	2.05965	1.498	0.419305
YML124C	176	1.74085	1.22182	0.105341
YLL024C	176	2.26449	1.41278	-0.135063
YNL206C	176	0.976831	0.628469	-0.34679
YOR389W	176	1.41972	0.512953	-0.832699
YLR395C	175	1.87342	1.27229	0.773442
YBL076C	175	1.37702	0.428767	0.416714
YNL208W	175	1.6084	1.08899	0.270754
YOL014W	175	1.41905	0.78653	0.220059
YJR045C	175	2.46233	1.56383	0.00885143
YGL137W	175	1.38779	1.0863	-0.0481617
YOR085W	175	1.73768	1.07108	-0.0848949
YMR038C	175	-0.358725	1.31524	-0.324415
YCR034W	175	1.34769	0.803584	-0.604699
YGR264C	175	1.57428	0.749838	-0.846509
YOL076W	175	2.05989	1.30437	-0.954949
YNL123W	175	-1.17387	0.296923	-1.03252
YDR496C	174	0.430058	0.397422	2.38774
YHL029C	174	2.2811	1.66531	0.847007
YIL074C	174	1.88951	1.45122	0.722316
YOR372C	174	1.88363	1.20416	0.644097
YKL183W	174	0.85953	0.802624	0.619485
YKL142W	174	2.10134	1.43586	0.602128
snR42	174	1.68925	1.07999	0.56229
YML116W	174	0.805595	0.33943	0.332082
YDR035W	174	0.661774	0.952482	0.265887
YAR035C-A	174	1.54094	0.467345	-0.287299
YNL268W	174	1.93207	1.19145	-0.41528
YAL051W	174	2.00194	1.04932	-0.45391
YPL093W	174	2.02581	1.77233	-0.50571
YNL062C	174	1.31603	0.683958	-0.517689
YGL032C	173	1.78445	1.32011	2.19299
YPL190C	173	1.87411	1.42278	1.31364
YMR058W	173	0.764527	0.519594	1.27159
YKL086W	173	2.09404	1.69676	1.21766
YDL122W	173	0.497008	1.04498	0.980072
YOR311C	173	0.882321	0.406223	0.847218
YBR065C	173	2.22644	1.51448	0.529611
YNL197C	173	1.83054	1.19505	0.173471
YIL159W	173	2.01816	1.10005	-0.362453
YJL110C	172	1.54068	1.0817	3.60992
YJL080C	172	1.85966	1.29841	1.00317
YPL259C	172	1.2471	1.91558	0.94747
YGR267C	172	1.44331	1.04525	0.74919
YLR212C	172	0.94333	1.09048	0.635357
YER063W	172	1.56722	1.14783	0.608438
YER184C	172	2.07803	1.54396	0.406579
YBR198C	172	1.7484	1.4289	0.354431
YPR003C	172	1.27609	0.926197	0.305438
YDR353W	172	1.46057	0.946151	0.139352
YJL217W	172	1.92691	1.2182	0.0762256
YHR098C	172	1.72525	0.852451	-0.0135244
YMR197C	172	1.34648	1.30504	-0.0985593
YMR069W	172	3.39819	2.32778	-0.14199
YNL287W	172	1.68743	1.37879	-0.544077
YOR167C	172	2.38356	1.85318	-0.667228
YOR154W	171	-0.48359	0.385962	2.62049
YLR063W	171	0.788293	0.603	1.07259
YGR094W	171	1.66802	1.12523	1.00383
YER166W	171	0.803667	0.500876	0.935543
YDL215C	171	2.8184	2.33897	0.79855
YER006W	171	1.62283	1.04902	0.747777
YBL014C	171	1.39826	0.954864	0.705361
YMR260C	171	0.0367421	0.966675	0.545284
YLL009C	171	0.984398	0.899063	0.536198
YNL199C	171	1.36485	0.950401	0.450423
YKL009W	171	1.71595	0.808253	0.197448
YOR237W	171	1.39056	1.00228	0.019269
YMR124W	171	1.79075	1.01503	-0.114071
YJR002W	171	1.5913	0.596696	-0.187463
YPL078C	171	1.71365	1.23942	-0.438401
YDL208W	171	1.64838	1.84513	-0.659182
YLR350W	170	2.09172	1.72119	1.65055
YGR218W	170	0.441356	0.783715	1.42621
YDL084W	170	1.21887	0.961612	1.41196
YDL072C	170	1.93806	1.45248	1.08946
YPL042C	170	0.832584	1.08549	0.864026
YDR261C	170	2.03082	1.24705	0.791662
YGR192C	170	-0.393666	0.645243	0.733609
YER122C	170	1.26542	1.16798	0.657942
YER055C	170	2.74896	1.98507	0.490448
YOL012C	170	2.67691	1.94653	0.439369
YDL160C	170	1.67591	1.46707	0.352302
YML009C	170	1.77701	1.14401	0.188567
YDR138W	170	0.723442	0.359504	0.102687
YLR432W	170	0.449368	0.202629	-0.150406
YBR138C	170	1.88415	1.09292	-0.206862
YDL070W	170	2.22247	1.54674	-0.289871
YLR096W	170	1.93196	1.40605	-0.967971
YIL115C	170	1.93431	1.18544	-1.03381
YKR102W	169	1.19082	1.03348	0.623256
YHR178W	169	2.06664	1.11756	0.382888
YGR124W	169	1.7417	1.2239	0.346409
YOL139C	169	0.902393	1.4529	0.318442
YEL055C	169	1.31716	0.663866	0.117384
YER019C-A	169	1.70163	1.29743	-0.0485083
YNL008C	169	1.13932	0.807625	-0.399933
YLR259C	169	1.57433	0.850353	-0.461209
YBR031W	169	0.790174	1.13956	-0.461725
YCR093W	169	1.74809	1.32482	-0.570008
YBR029C	169	1.37586	1.24277	-0.731275
YCR019W	168	0.592926	1.21314	2.44212
YGR054W	168	1.10866	1.04539	2.03138
YDR372C	168	0.855804	1.03055	1.2498
YLL043W	168	1.98493	1.2028	0.698733
YHL004W	168	2.11878	1.4869	0.444405
YKL124W	168	1.33643	0.98832	0.243329
YFR006W	168	1.76845	0.96189	0.224154
YLR157W-E	168	0.995225	1.58257	0.170351
YGR183C	168	2.01754	1.8408	0.075897
YFR035C	168	1.95051	1.20314	-0.165429
YGL197W	168	2.25694	1.55645	-0.204139
YOR231W	168	2.17906	1.67107	-0.534898
YNL029C	168	1.73018	1.43242	-0.705274
YDR432W	168	0.848933	1.33097	-1.0209
YPL119C-A	168	-0.185896	0.0112631	-1.4893
YDR399W	167	2.19038	1.37857	1.23145
YNL192W	167	2.96774	2.09842	0.767942
YDL010W	167	2.48754	1.93957	0.415598
YLR285W	167	2.04836	1.24654	0.116649
YER086W	167	1.83142	1.15167	0.0293575
YDR313C	167	1.53089	0.876483	-0.338123
YOR207C	167	1.87267	1.4417	-0.371414
YOL164W	167	0.332315	0.281259	-0.523679
YOR370C	167	1.67552	1.28378	-0.564387
YPL090C	166	1.9224	1.446	6.22292
YBR230W-A	166	2.45051	1.87886	2.03835
YHR183W	166	1.7899	1.33231	1.67417
snR191	166	-0.257631	-0.380375	1.41212
YNL232W	166	1.39094	0.878296	1.13371
YOR151C	166	1.72974	1.46764	1.04808
YPL088W	166	1.81131	1.32053	1.01808
YHR170W	166	1.54991	1.0886	0.789485
YPL052W	166	1.21683	1.26231	0.572829
YMR290C	166	1.79027	1.39436	0.554799
YOR122C	166	1.62919	1.03275	0.507088
YHR135C	166	1.36418	0.916027	0.460948
YDR528W	166	2.10019	1.58334	0.363023
YMR315W	166	1.7091	1.17179	-0.0228458
YHR008C	166	2.03113	1.62047	-0.0259928
YDR262W	166	2.38481	1.27568	-0.128793
YCR069W	166	1.80034	1.23743	-0.14262
YNL169C	166	1.06904	0.819484	-0.424557
YCL068C	166	0.88841	0.513233	-1.18904
YOR223W	166	0.875255	1.30227	-1.53831
YLR250W	165	0.994582	0.765061	3.59838
YDR245W	165	0.884712	0.92959	2.17101
YNR016C	165	2.90543	2.05854	2.05046
YLL040C	165	0.622616	0.472506	1.75143
YLR367W	165	2.17828	2.04091	0.682111
YMR075W	165	1.74784	1.42638	0.627607
YGR266W	165	1.40519	0.602979	0.453206
YHR065C	165	-0.196119	1.46419	0.192741
YGR179C	165	0.10685	0.523078	0.118548
YBR079C	165	0.997627	0.215233	-0.351661
YGL097W	165	2.36431	1.38514	-0.418605
YPL277C	165	2.07184	1.25927	-0.785293
YNL016W	164	1.13709	1.26364	1.49351
YGR178C	164	1.71279	0.91884	1.02717
YNR001C	164	2.94914	1.98951	0.867416
snR86	164	1.08375	0.440266	0.819249
YJL151C	164	2.76376	2.13158	0.684317
YMR109W	164	1.18161	0.816271	0.266879
YDR296W	164	2.09501	1.77985	0.233667
YPR016C	164	0.929173	1.02279	0.218351
YGR187C	164	0.43153	0.364282	0.194517
YDR034C	164	1.9255	1.50634	0.167444
YEL024W	164	2.11412	1.83747	0.0614884
YPL210C	164	0.60527	0.82891	0.0111244
YCR072C	164	0.851396	1.36242	-0.122327
YCL036W	164	2.29002	1.61671	-0.957934
YCL039W	164	0.548658	0.648923	-1.24478
YCR057C	164	1.21281	0.886396	-1.3703
YNL330C	164	0.759133	0.613298	-1.4072
YEL017W	163	0.623789	0.889954	2.71096
YAL002W	163	0.175842	0.689393	2.61092
YPR104C	163	1.07261	1.12767	1.72944
YBL004W	163	1.69091	0.787855	1.5665
YBR080C	163	1.52647	1.24845	1.37235
YJR007W	163	1.92089	1.22498	0.923954
YLR353W	163	2.28223	1.5258	0.729753
YLR307C-A	163	1.36713	0.883717	0.631082
YGR245C	163	-0.0576282	0.807607	0.460613
YHR089C	163	1.40134	1.23035	0.444302
YER155C	163	1.57724	1.14237	0.432092
YGR103W	163	0.450566	0.749777	0.339558
YJR117W	163	1.04876	0.994803	0.307475
YBR008C	163	-1.01262	-0.32905	0.218871
YHR088W	163	1.20638	1.05605	0.0811429
YER087C-B	163	0.601204	0.495582	0.0743693
YMR309C	163	1.8178	1.23703	-0.0843472
YGL173C	163	1.21256	0.683686	-0.110623
YGR289C	163	1.61631	0.857672	-0.117637
YBR287W	163	0.898924	0.712909	-0.176007
YER120W	163	1.62493	1.25966	-0.39578
YOL059W	163	-0.382725	0.950175	-0.470233
YPR199C	163	0.883348	1.38729	-0.532656
YJL033W	162	1.09939	0.877636	4.64151
YDR090C	162	1.4017	0.827255	0.744147
YDL130W-A	162	1.71121	1.27673	0.540905
YLR116W	162	0.591983	0.601863	0.518131
YDR153C	162	2.01545	1.4206	0.515092
YDR032C	162	2.30679	1.47353	0.372571
YMR318C	162	1.63653	0.930116	0.366457
YMR216C	162	0.901962	0.887625	0.341251
YBR104W	162	2.23277	1.17906	0.246983
YGR270W	162	1.68107	1.25716	0.171654
YMR043W	162	-0.0733395	1.15202	0.156576
YCR047C	162	1.97393	1.39746	0.0685938
YJR152W	162	0.808343	1.03061	0.0241938
YMR182W-A	162	1.40554	0.483672	-0.307802
YOR133W	162	1.34094	1.33685	-0.373723
YLR027C	162	2.05622	1.34561	-0.465571
YJL035C	162	2.36303	1.40137	-0.499744
YGR136W	162	1.33756	1.05138	-0.536802
YJL198W	162	2.34772	1.57844	-0.621331
YLL018C-A	162	1.5892	1.12141	-0.792522
YPL146C	161	1.74293	1.21084	2.28969
YEL006W	161	0.804865	0.601257	1.89286
YER136W	161	1.5899	0.97428	1.64414
YCR017C	161	1.40623	1.00678	1.26718
YPL263C	161	1.07384	0.960031	1.01925
YKL130C	161	0.949455	0.825136	0.796773
YOL151W	161	1.63261	1.49553	0.58521
YPL233W	161	1.87105	1.39576	0.57215
YOL036W	161	1.76866	1.61207	0.53086
YER178W	161	1.83036	1.28334	0.290767
YOR198C	161	2.4679	2.00263	0.257983
YNL156C	161	1.81548	1.36554	0.253386
YBR060C	161	1.48462	1.13392	0.241169
YOR254C	161	1.72243	1.16261	0.193326
YMR005W	161	0.737461	0.787783	0.165914
YER111C	161	2.69314	1.42972	0.143586
YLR309C	161	0.839746	0.960296	-0.0175745
YGL252C	161	2.11689	1.46728	-0.148832
YBR298C	161	1.46395	0.503821	-0.15547
YJL187C	161	2.60671	1.71631	-0.287643
YDR255C	161	1.14726	0.863463	-0.311926
YHR205W	161	0.957312	0.464222	-0.374124
YNR009W	161	3.2468	2.0425	-0.412019
YML099C	161	1.30034	0.940577	-0.481645
YDL074C	161	1.4124	0.577657	-0.57242
YMR037C	160	1.33702	1.04367	1.49413
YJL207C	160	1.58266	0.779814	1.33344
YGR155W	160	1.95524	1.59103	0.982507
YEL013W	160	1.2358	1.23395	0.886144
YNL175C	160	1.65017	1.02513	0.786799
YNL135C	160	1.95896	1.51103	0.449078
YDR507C	160	1.70222	0.708639	0.286581
YGL122C	160	1.79234	1.49873	0.23364
snR5	160	2.07472	1.38829	0.191632
YDR238C	160	1.23166	0.581454	0.165929
YBL024W	160	0.68149	1.10394	0.0219563
snR161	160	1.91392	1.32303	-0.061525
YFR001W	160	-0.731566	0.362194	-0.109079
YJL129C	160	1.61266	0.938647	-0.273397
YAL017W	160	0.413234	0.40305	-0.286944
YPR158W	160	1.38978	0.798019	-0.390669
YOR320C	160	1.46323	0.759261	-0.43788
YOR142W	160	1.51854	0.980401	-0.747906
YMR203W	160	1.67599	0.932445	-0.82021
YCL011C	160	0.545631	0.244113	-0.973403
YDR361C	159	0.508011	0.26874	1.24176
YNL075W	159	1.56343	0.939094	1.16661
YIR018C-A	159	2.79206	2.03741	1.12906
YPL106C	159	0.00465032	1.09343	1.09966
YOR382W	159	1.54305	1.088	1.02158
YPR122W	159	1.70249	1.33461	0.99884
YBR208C	159	2.54072	1.43947	0.871787
YGL184C	159	2.22246	1.58093	0.812464
YNL301C	159	1.36094	0.948986	0.800428
YDR368W	159	0.815213	0.821865	0.716596
YDR062W	159	1.86364	1.46339	0.710381
YHR154W	159	1.15176	0.50802	0.429382
YGL063W	159	1.89671	1.50103	0.295387
YPL067C	159	1.95596	1.48579	0.231085
YBR179C	159	2.22671	1.43693	0.162226
YLL050C	159	1.71766	1.41181	0.0146748
YNL042W-B	159	2.93326	1.6382	-0.106759
YNR074C	159	-0.411433	0.0606786	-0.222789
YHR039C-A	159	1.89798	1.46421	-0.255027
YDR293C	159	2.37798	1.67569	-0.298956
YDR407C	159	1.6065	1.07349	-0.44487
YJR139C	159	1.91344	1.46323	-0.655935
YIL142W	159	0.877706	0.290242	-0.731292
YLR409C	158	0.459391	0.75823	1.79316
YDR254W	158	1.53951	1.6338	1.13307
YMR125W	158	0.489828	0.698054	1.10819
YDR482C	158	1.57471	1.23407	1.05142
YKL035W	158	1.84838	1.31961	0.854437
YFL013C	158	1.10205	0.839723	0.701261
YKR059W	158	2.15644	1.82615	0.611342
YGL058W	158	1.94749	1.33192	0.592061
YEL012W	158	1.8901	1.33475	0.349479
YHR175W	158	1.19507	0.727468	0.331066
YGR144W	158	1.40304	1.20309	0.294934
YLR129W	158	1.32994	0.88167	0.230937
YLL031C	158	1.64447	0.857232	0.182492
YDR461C-A	158	1.8451	1.35163	-0.0478013
YDL110C	158	1.35833	0.802455	-0.167839
YBR182C	158	1.00762	0.602433	-0.208273
YCR094W	158	-0.374762	0.175686	-0.371196
YBL051C	158	1.82291	1.22111	-0.39823
YBR101C	158	2.25064	1.32249	-0.468706
YDL157C	158	1.07016	0.885756	-0.614552
YGR285C	158	-0.325672	0.591616	-1.39274
YMR105C	157	1.84439	1.22894	1.73176
YKL068W	157	1.69579	1.03083	1.10587
YLR168C	157	1.61226	1.12634	1.05265
YBR045C	157	0.336608	0.621262	0.922262
YER114C	157	1.95791	0.891832	0.762678
YDL121C	157	1.9083	1.64626	0.489089
YER021W	157	0.97751	1.14499	0.458017
YIL144W	157	0.78226	0.725241	0.448671
YLR186W	157	-0.265583	0.648124	0.411188
YHR086W	157	0.83712	0.384834	0.325055
YPR196W	157	1.0046	0.771202	0.302454
YML072C	157	1.69158	0.955102	0.209692
YKL210W	157	1.69654	1.22622	0.14518
YGL148W	157	1.37747	0.908762	0.0201694
YJR065C	157	1.43195	0.680224	-0.128145
YDR463W	157	2.25898	1.88963	-0.228876
YKL081W	157	1.63159	1.00694	-0.321213
YOR205C	157	-0.636287	0.193096	-0.605351
YPL162C	157	1.70751	0.78818	-0.749809
YLL011W	157	1.92666	1.81174	-0.800506
YLR178C	157	0.394433	0.444353	-0.932545
YPL137C	156	1.65015	1.21682	1.61451
YER148W	156	0.725662	0.438313	1.39574
YDR270W	156	1.84896	1.29767	1.35458
YDR169C	156	1.25353	0.886703	0.999243
YPR143W	156	0.253507	0.94993	0.816836
YMR003W	156	2.11342	1.27575	0.779319
YMR256C	156	2.05063	1.18398	0.778312
YNL110C	156	1.76867	1.17763	0.591542
YKL005C	156	2.03808	1.53136	0.421688
YPL155C	156	1.79518	1.00696	0.315257
YIL140W	156	1.4321	0.886462	0.283396
YLR295C	156	1.68354	1.24894	0.209631
YNL271C	156	1.97252	1.35429	0.208378
YHR103W	156	1.94046	1.03906	0.199216
YKL039W	156	1.25476	1.08149	0.127463
YML028W	156	1.03459	0.611984	0.0340763
YLL041C	156	1.44365	0.888929	-0.0366058
YKL125W	156	1.88383	0.981704	-0.106724
YFR002W	156	1.06022	0.298424	-0.20663
YIL035C	156	1.99942	1.41397	-0.372174
YEL021W	156	0.628687	0.296562	-0.514753
YHL044W	156	0.961839	0.544387	-0.65556
YER163C	156	1.33596	0.802973	-0.714494
YBR011C	156	2.16566	1.54921	-1.03473
YIL113W	155	1.73847	1.17348	1.77949
YPL013C	155	1.27476	0.817955	1.26783
YDR003W	155	1.37984	0.935423	1.09394
YER110C	155	0.925716	0.670218	1.08879
YKL072W	155	0.925552	0.974586	0.872139
YDL001W	155	1.9161	1.35137	0.738221
YNL087W	155	2.22197	1.30912	0.736617
YDL006W	155	1.06508	0.834029	0.735362
YOR330C	155	2.74781	1.93326	0.0204097
YLL021W	155	1.57604	0.772982	-0.0434258
YFL045C	155	-0.0568097	0.651377	-0.122019
YHL011C	155	1.19206	0.976172	-0.260862
YEL043W	155	1.18729	0.773577	-0.45552
snR189	155	1.2777	1.04433	-0.509561
YKR071C	155	-0.720749	1.47891	-0.648503
YNL243W	155	2.62729	1.76199	-0.712713
YER082C	155	0.802813	1.1735	-0.761448
YEL061C	155	0.945864	0.483151	-0.775358
YFR030W	155	1.40039	0.844596	-0.84644
YDL197C	155	2.45048	1.49842	-0.953055
YMR080C	154	0.7683	0.92391	1.61407
YNL185C	154	0.119638	0.562994	1.50843
YDL198C	154	2.30771	1.51853	1.15719
YLR407W	154	1.46409	0.892464	0.901516
YPL118W	154	0.285896	0.543012	0.658443
YPL050C	154	1.61219	1.20515	0.390103
YOR052C	154	1.79271	1.16646	0.357792
YML043C	154	0.559984	1.20284	0.297049
YER176W	154	1.3995	0.962057	0.0362506
YGR119C	154	1.44063	0.812151	-0.00797403
YOL010W	154	1.66227	1.00908	-0.062237
YCR053W	154	1.11193	0.697803	-0.124326
YMR117C	154	1.58629	0.870326	-0.172204
YDR119W	154	1.69526	1.23721	-0.249819
YHR123W	154	1.33241	1.17791	-0.252391
YDL113C	154	1.42709	0.981442	-0.320783
YJL186W	154	1.54428	0.578862	-0.325491
YPL127C	154	1.8548	1.2732	-0.536651
YNR020C	154	1.66908	1.4157	-0.599869
YPR023C	154	1.65489	1.06733	-0.748697
YLR157C-C	153	2.39008	1.67394	1.57284
YJL210W	153	2.68842	1.97552	1.55067
YLR343W	153	-0.0368314	-0.366638	1.29054
YGR145W	153	-0.0543987	0.580586	0.743213
YKL172W	153	0.571039	0.332486	0.696786
YMR149W	153	1.21702	1.04232	0.291503
YLR001C	153	1.21578	0.911054	0.255482
YLR223C	153	1.60393	1.14802	0.172678
snR83	153	1.4801	0.702046	0.00866079
YNL183C	153	1.10263	0.603062	0.00715751
YGL234W	153	2.89635	1.97038	-0.0439425
YDR328C	153	1.24259	0.77994	-0.0912039
YDR004W	153	2.109	1.61748	-0.0964399
YLR008C	153	2.22276	1.37854	-0.451896
YBR002C	153	1.64025	1.16565	-0.476797
YKR008W	153	1.34232	0.678301	-0.594722
YKR082W	153	1.02597	0.953135	-0.720788
YNL207W	153	0.946783	0.332854	-0.877349
snR14	153	0.301065	0.38505	-0.897256
YGR074W	153	-0.264636	0.41464	-0.977278
snR37	152	0.956895	1.22718	3.42651
YCL054W	152	0.923616	0.697697	1.51317
snR59	152	0.218172	0.185607	1.27356
YPL169C	152	0.909584	0.634042	1.25011
YIL124W	152	0.84303	0.709441	1.13533
YJL051W	152	0.962588	0.524916	1.0777
YGL134W	152	1.22828	0.564823	0.843072
YKL110C	152	1.00628	1.03886	0.820278
YGL207W	152	1.73574	1.1842	0.689595
YHR001W-A	152	1.15026	0.808542	0.655082
YHR082C	152	1.92564	1.32172	0.439474
YLR368W	152	0.0719711	0.324741	0.189155
YJR078W	152	2.11824	1.45416	-0.0781961
YDR127W	152	1.38832	1.18212	-0.0785217
YCL010C	152	1.86703	1.49918	-0.110581
YBL097W	152	0.982411	0.841499	-0.12762
YDR143C	152	-2.38879	0.983396	-0.2439
YJL055W	152	1.44101	1.10099	-0.297753
YLR330W	152	1.39101	0.960247	-0.30157
YBL047C	152	0.91481	0.271714	-0.336237
YBR001C	152	1.06755	1.03746	-0.422363
YPL072W	152	-0.203812	0.962328	-0.462484
YLR071C	152	1.54642	1.09722	-0.493021
YNR029C	152	1.2771	1.27615	-0.49588
YGL021W	152	0.526876	0.19765	-0.665332
YAL041W	152	1.12974	0.921964	-1.32651
YJR090C	151	0.1445	0.322105	2.435
YLR156C-A	151	2.81713	1.94555	1.65523
YLR159C-A	151	2.12329	1.48397	1.52852
YGR021W	151	1.91467	1.27724	1.2659
YGR196C	151	0.959105	0.815175	0.770128
YBL054W	151	1.58386	0.846027	0.700828
YGL195W	151	1.29281	0.78893	0.583158
YEL025C	151	1.60525	1.10042	0.507399
snR34	151	2.12574	1.5072	0.404355
YNL229C	151	2.13821	1.45892	0.370232
YPL215W	151	1.35484	0.872981	0.353868
YDR189W	151	1.21002	0.66943	0.352999
YBR007C	151	0.612123	0.268519	0.351666
YDL042C	151	1.58633	0.877567	0.285235
YEL023C	151	1.06185	0.955175	0.268305
YGR128C	151	1.53289	1.12564	0.182764
YMR040W	151	1.85939	1.84178	-0.0465589
YCR028C	151	0.962977	0.834152	-0.0890417
YER126C	151	1.81087	1.17546	-0.11767
YBL010C	151	1.42306	1.05522	-0.121397
YDR541C	151	0.782894	0.545534	-0.171775
YKR001C	151	1.52984	0.697048	-0.235116
YER042W	151	0.467932	0.452548	-0.23657
YKL149C	151	0.882381	0.293261	-0.379621
YCR090C	151	-1.44437	0.485037	-0.546167
YBR169C	151	0.729973	0.348521	-0.580789
YOR353C	151	-0.364999	0.73985	-0.710339
YMR215W	151	1.09538	0.815078	-0.716137
YAL042W	151	1.60601	1.26342	-0.866168
YOR194C	151	1.03854	0.637764	-1.51834
YPL049C	150	2.06171	1.32673	1.57873
YGL180W	150	2.31562	1.28442	1.33934
YDR319C	150	-0.0995333	0.777613	1.26717
YMR076C	150	2.14035	0.792528	1.03796
YJL115W	150	1.45089	0.920043	0.859585
YDR266C	150	0.932273	0.569922	0.735536
YGL083W	150	2.22376	0.922581	0.433479
YJR060W	150	1.73597	1.01782	0.407887
YOR288C	150	2.06114	1.26072	0.262147
YNL088W	150	1.75461	0.827187	0.20536
YGL106W	150	1.5201	1.17283	0.189671
YBR250W	150	1.60279	1.46889	0.160446
YGR283C	150	1.46135	1.01498	0.152361
YER026C	150	1.44857	1.01394	0.058276
YPL010W	150	1.42521	0.761603	0.00357467
YDR097C	150	1.06029	0.28546	-0.01183
YJL083W	150	3.49145	1.83893	-0.0569227
YEL047C	150	1.62538	1.06343	-0.0889153
YIL169C	150	-0.175944	-0.465313	-0.136696
YER051W	150	0.973183	0.899517	-0.368777
YLR093C	150	1.65543	1.00331	-0.40446
YFL054C	150	1.29368	0.412469	-0.519232
YOR045W	150	1.67661	1.39903	-0.528487
YFL018C	150	1.52769	1.30006	-0.539152
YHR163W	150	0.766979	0.778264	-0.797861
YNR035C	150	1.35575	1.36601	-1.18557
YLR455W	149	-0.460326	0.172985	1.35325
YPL271W	149	1.71392	1.59291	1.26991
YPR163C	149	1.77302	1.14222	1.08071
YLR002C	149	1.32929	0.840368	1.03832
YDL132W	149	0.967396	0.567143	0.726162
YGR158C	149	0.885057	0.662712	0.690836
YLR193C	149	1.68942	1.02015	0.58905
YOR042W	149	1.43518	1.29438	0.525019
YDL033C	149	1.35084	0.613549	0.489241
YDR129C	149	2.16479	1.38175	0.48415
YDR464W	149	-2.68542	0.72029	0.311158
YHR002W	149	1.35653	0.951332	-0.0555174
YPL203W	149	1.38995	0.708595	-0.252368
YJL104W	149	1.15151	0.870926	-0.42167
YJL041W	149	-0.0490369	0.230768	-0.656111
YGR235C	148	1.20432	1.37059	1.71968
YOR189W	148	1.16793	0.874527	1.30484
YGR056W	148	1.44533	1.01897	1.14851
YGL066W	148	1.28458	0.896778	1.09084
YKL077W	148	0.553324	0.53882	1.06238
YGR089W	148	0.61143	0.824078	0.810301
YGL095C	148	1.45507	0.724159	0.429212
YEL071W	148	2.13624	1.5689	0.388065
YCR095C	148	0.631586	0.473222	0.277311
YGR123C	148	1.82062	1.07096	0.275901
YBR036C	148	2.05729	1.03867	0.123637
YGR284C	148	0.970542	0.624474	0.0700959
YJL008C	148	1.54304	1.21926	0.0658791
YPL226W	148	0.997699	0.970907	0.0227135
YPL129W	148	1.4533	0.811561	-0.0464676
YPR114W	148	1.13986	0.881945	-0.070577
YEL020W-A	148	0.277624	-0.10045	-0.0794365
YDR395W	148	1.73882	0.852618	-0.0817162
YPL047W	148	0.105608	0.45298	-0.0967811
YJR076C	148	1.20884	0.492249	-0.180064
YBL078C	148	0.558214	0.282354	-0.276373
YLL060C	148	1.78825	1.04358	-0.323269
YBR211C	148	1.93584	1.21432	-0.329399
YEL032W	148	2.37573	0.870512	-0.412863
YBR088C	148	1.47651	0.807609	-0.434386
YDR091C	148	1.85704	0.936738	-0.538976
YPL279C	148	1.53252	0.997522	-0.54728
YDL235C	148	0.847808	0.535453	-0.635106
YCL045C	148	0.950086	0.684473	-0.674636
YOR006C	148	-0.286543	1.04372	-0.80041
YOR202W	148	0.946896	0.634886	-0.858008
YDR365C	148	1.64973	1.1518	-0.944527
YKL027W	148	-1.34635	0.921072	-1.06199
YKL212W	148	0.995797	0.538984	-1.41197
YER105C	148	-2.10832	-0.131057	-1.80517
YER152C	147	1.3086	0.66881	2.2987
YNL265C	147	0.654358	0.836269	1.91071
YOL129W	147	-0.180097	0.584273	1.19578
YKR028W	147	1.00698	0.671708	0.853876
YBR054W	147	2.35151	1.51173	0.789542
YHR081W	147	1.39045	0.873039	0.515854
YML085C	147	1.53358	1.16077	0.400663
YCR002C	147	1.05203	0.808695	0.393703
YNL201C	147	0.90669	0.581754	0.364295
YOL145C	147	0.650664	0.673528	0.254941
YPL074W	147	1.19167	0.706565	0.141767
YDR410C	147	1.63991	1.31796	0.0427844
YPR161C	147	1.43111	0.950299	0.0400558
YLR436C	147	1.65066	0.851675	0.00970408
YNL313C	147	2.37345	1.61759	0.00402109
YPL178W	147	-0.26313	1.31513	-0.0363789
YBL067C	147	0.93168	0.51023	-0.0614034
YHR027C	147	1.13581	0.493881	-0.066385
YPR075C	147	1.11443	0.551454	-0.0913272
YHR018C	147	1.11381	0.46872	-0.148355
YFL030W	147	1.13587	0.756614	-0.208001
YFR051C	147	1.78982	1.1717	-0.293703
YOR301W	147	1.75552	1.00584	-0.328303
YKL204W	147	-1.26957	0.207158	-0.348744
YAL056W	147	0.733511	0.562879	-0.563303
YKL190W	147	2.1325	1.5777	-0.660622
YDR518W	147	1.20417	0.659392	-0.691139
YJL089W	147	1.90442	1.11426	-0.784632
YDR177W	147	1.14114	0.760245	-0.903727
YKR100C	147	1.7361	1.04695	-0.941427
YNL329C	147	1.5305	0.993542	-0.987032
YER161C	147	0.359344	0.86193	-1.04726
YNL311C	147	1.13788	0.637999	-1.14789
YKR065C	147	0.563563	0.855346	-1.30139
YKL206C	147	1.23388	0.780391	-1.32092
YFL048C	147	0.309088	1.06975	-1.3433
YNR038W	147	2.20359	1.937	-1.44823
YOR021C	146	1.6823	1.42039	3.55914
YNL267W	146	0.776442	0.29284	2.74088
YMR104C	146	0.350352	0.443916	1.85538
YLR221C	146	0.740673	0.328638	1.84115
YGL202W	146	0.923058	0.785462	1.52441
YLR306W	146	1.37022	0.67649	0.751729
YDR207C	146	1.2399	0.904868	0.469686
YDR443C	146	1.53298	0.656477	0.452019
YOR137C	146	1.52036	1.39778	0.441088
YJR097W	146	1.62997	1.22207	0.431218
YJL013C	146	0.713882	0.126993	0.326771
YBL034C	146	1.60328	0.925122	0.317945
YLR121C	146	1.4387	0.805089	0.316436
YFL034C-B	146	0.0757562	0.255853	0.252347
YGR131W	146	1.82884	1.30535	0.221058
YHR042W	146	2.01595	1.78751	0.173425
YDR208W	146	2.70648	1.79888	0.122214
YDR529C	146	2.3089	1.5229	0.11421
YJL154C	146	1.10269	1.43606	0.0780192
YOR014W	146	1.75446	0.993907	0.00848083
YGL133W	146	-1.783	0.667382	-0.150381
YDR264C	146	1.04554	0.696362	-0.17866
YKL061W	146	1.15396	0.647505	-0.199977
YNR039C	146	1.16678	0.474311	-0.296168
YML093W	146	0.78259	0.675561	-0.341795
YJL109C	146	-0.975511	0.288221	-0.345205
YKR056W	146	-1.13376	0.426964	-0.377266
YML069W	146	0.872817	0.535727	-0.514957
YKL020C	146	1.41835	1.02812	-0.558741
YBR017C	146	1.26762	0.709195	-0.566693
YFL002C	146	0.638118	0.321173	-0.603345
YLL001W	146	1.26745	0.794162	-0.67125
YLR208W	146	1.48795	0.964368	-0.709788
YMR091C	146	0.815506	0.887175	-1.00779
YBR164C	145	1.00343	0.781421	2.62778
YPL059W	145	0.850728	1.07914	2.59436
YDR247W	145	2.55745	1.88661	2.13674
YKR010C	145	-1.64221	0.946334	1.72527
YDL236W	145	0.978122	0.617565	1.18854
YPR029C	145	1.05363	0.258617	0.979062
YGL044C	145	1.2715	0.646441	0.828934
snR32	145	1.94255	1.47569	0.828079
YPL144W	145	1.62723	1.22084	0.77541
YPL180W	145	1.30897	1.17368	0.707593
YOR181W	145	0.968375	0.566116	0.61515
YNR034W	145	1.70008	1.31226	0.534592
YDR045C	145	1.21126	0.715791	0.46961
YDR377W	145	2.02214	1.27947	0.36509
YPL254W	145	0.979881	0.24445	0.315573
YOL087C	145	1.26441	0.759439	0.308965
YML057W	145	2.16107	1.4333	0.271934
YJR112W	145	1.38859	1.18307	0.241922
YGR140W	145	1.62621	0.795059	0.177732
YLR034C	145	1.16076	0.8635	0.174537
YOR005C	145	0.352157	0.467581	-0.0632365
YOR259C	145	1.35377	0.657897	-0.0727138
YOR359W	145	2.0547	1.42963	-0.0994924
YJL084C	145	1.49025	0.874976	-0.140307
YNL125C	145	2.16008	1.46716	-0.230376
YNL106C	145	1.36355	1.21778	-0.24299
YNL054W	145	1.5243	1.1114	-0.37747
YKL141W	145	1.26722	0.939504	-0.439465
YPR170W-B	145	1.49336	1.35114	-0.442983
YGR258C	145	1.65789	0.919393	-0.942777
YNL246W	145	0.687169	0.392568	-0.961394
YBR222C	145	1.25369	0.882208	-1.15702
YKL196C	145	1.49089	0.88411	-1.52178
snR13	144	1.06345	0.947522	1.39986
YMR014W	144	1.90494	1.43118	1.26613
YNL130C	144	1.35465	1.31308	1.25854
YLR449W	144	0.541649	0.350293	1.23428
YDR520C	144	0.631166	0.713899	1.0903
YDR041W	144	1.2374	0.83975	0.978414
YDR027C	144	0.698069	0.197731	0.879179
YIL161W	144	0.510459	0.281577	0.607914
YDL217C	144	0.680301	0.278518	0.560928
YML127W	144	1.29213	0.701653	0.513165
YER151C	144	1.23281	0.469599	0.441083
YOR034C	144	2.0934	0.831754	0.398229
YEL037C	144	1.79148	1.4606	0.397967
YHR127W	144	1.71047	0.960049	0.374056
YDL241W	144	1.18318	0.813823	0.302734
YHR061C	144	2.06826	1.04643	0.287275
YDR497C	144	2.19844	1.48453	0.193078
YGR030C	144	1.39313	0.771367	0.0839792
YDR218C	144	0.347624	0.281493	0.0759208
YBL056W	144	1.71269	1.07801	0.0406931
YJR014W	144	1.00734	1.31792	0.0102646
YLR133W	144	0.853406	0.691948	0.000515278
YGR024C	144	1.48696	0.769778	-0.0815403
YMR024W	144	0.940599	1.03133	-0.0912639
YBL035C	144	0.987525	0.710754	-0.183879
YEL031W	144	0.92214	0.662226	-0.249321
YIL036W	144	1.24475	0.82109	-0.290219
YOR215C	144	0.8922	0.494121	-0.297057
YIL033C	144	1.99657	1.49749	-0.312757
YJR129C	144	0.689512	0.401687	-0.396772
YDR411C	144	1.70942	1.07202	-0.502707
YFR052W	144	1.52354	1.00844	-0.545326
YOR390W	144	1.23834	0.742731	-0.596653
YAL012W	144	1.19809	0.495111	-0.607233
YKR038C	144	3.06421	1.75754	-0.710708
YDR488C	144	0.704168	0.257506	-0.763956
YOR178C	143	0.941148	0.728584	1.84389
YGR037C	143	1.7198	1.06738	1.51332
YBL036C	143	1.15227	0.918855	1.36464
YGL167C	143	2.36334	1.87794	1.31543
YOR316C-A	143	0.585764	0.934649	0.814445
YIL021W	143	1.47027	0.736927	0.807759
YHR147C	143	1.46625	0.70452	0.676604
YJL164C	143	1.60339	1.05764	0.65071
YLR114C	143	1.22228	0.448809	0.444255
YMR123W	143	1.40587	1.07525	0.42044
YBR043C	143	1.94349	1.28676	0.368083
YDR352W	143	2.10365	1.49812	0.345832
YOL077W-A	143	1.18001	0.938638	0.285568
YIL090W	143	1.57582	0.959398	0.182045
YGL050W	143	1.80626	0.962969	0.10459
YHR026W	143	1.01056	0.365262	0.0770245
YFR014C	143	1.46476	1.03714	0.0568951
YPL160W	143	1.53586	1.51406	0.0132895
YGL181W	143	1.82297	1.2488	-0.105352
YNR006W	143	1.27379	0.836267	-0.157315
YIL075C	143	1.45473	0.739981	-0.223522
YML048W	143	1.48646	1.09229	-0.512594
YNL081C	143	0.885496	1.26885	-0.762182
YKL025C	143	1.17727	1.11802	-1.24467
YPL246C	143	1.6535	1.14194	-1.29352
YGR237C	142	1.44174	0.990904	2.07072
YLR106C	142	-0.528256	0.488431	1.8531
YBR092C	142	0.592812	0.609233	1.67063
YDR100W	142	1.90708	1.50019	1.14924
YDR335W	142	1.50566	0.747119	1.12564
YOR171C	142	1.48919	0.956946	0.948554
YGL244W	142	1.38791	1.07384	0.896885
YML056C	142	1.56529	0.871376	0.709301
YBR010W	142	1.37431	1.20122	0.50838
YLL032C	142	-1.3169	0.297189	0.478133
YLR073C	142	1.44395	0.805106	0.42439
YBR120C	142	1.3321	0.841688	0.380573
YJL218W	142	1.68265	0.526873	0.331558
YNL080C	142	1.55669	1.20209	0.280821
YDR206W	142	1.30204	0.731823	0.274712
YFR049W	142	0.909965	0.98623	0.131477
YML087C	142	0.895606	0.799062	0.105189
YPR118W	142	1.54203	0.991898	0.0844408
YML001W	142	1.49712	1.07764	0.032293
YOR191W	142	0.947718	0.774835	-0.030869
YDL175C	142	0.418956	0.398056	-0.0529225
YKL095W	142	1.63728	1.15962	-0.0600676
YDL027C	142	1.29783	0.859185	-0.127375
YPR004C	142	0.924668	0.582503	-0.16669
YML082W	142	1.33152	0.745815	-0.170782
YNL284C	142	1.59217	1.05548	-0.218615
YPR062W	142	2.14591	1.40771	-0.243848
YOR290C	142	1.58315	0.689649	-0.264744
YHR197W	142	0.598692	0.354569	-0.320908
YJL171C	142	2.27301	1.53042	-0.328415
YPL204W	142	1.18715	0.835697	-0.368061
YDR326C	142	0.934845	0.505755	-0.443276
YJL014W	142	1.02697	0.893694	-0.517239
YBR129C	142	1.48834	1.3837	-0.587751
YML115C	142	1.11145	0.630493	-0.634817
YPL252C	142	1.55557	1.53422	-0.870618
YNR046W	142	1.47223	0.955633	-0.876234
YLR456W	142	1.22349	0.832296	-0.919946
YML038C	142	0.732158	0.487177	-0.944577
YJL209W	142	1.26649	0.641238	-0.989365
YAL035W	142	1.77201	0.609834	-1.07487
YKR091W	141	0.924681	0.795518	2.61861
YJL132W	141	0.572119	0.849972	2.25307
YBR248C	141	1.23131	0.844226	1.89639
YDR251W	141	1.98311	1.38595	1.68944
YDR212W	141	0.778396	1.0504	1.49399
YJR030C	141	0.434511	0.0353482	1.27859
YGL086W	141	1.21523	0.706223	1.18671
YBR147W	141	0.859467	0.777564	0.650406
YOR004W	141	1.47673	0.822614	0.58735
YKR095W-A	141	0.990174	0.571548	0.47785
YNL113W	141	1.65342	1.5557	0.380223
YDL101C	141	-0.0559014	0.399688	0.377304
YPR009W	141	0.71367	0.578418	0.301484
YHR068W	141	1.14029	1.05908	0.203364
YKL075C	141	0.462409	0.324914	0.0696348
YNL176C	141	1.37922	0.902543	-0.0864411
YBR096W	141	1.0719	0.886043	-0.0930248
YPL171C	141	0.834187	0.805985	-0.227638
YBR242W	141	0.979725	1.09555	-0.248128
YDR350C	141	1.40921	0.959919	-0.272855
YNL122C	141	0.759016	0.861366	-0.328347
YDR017C	141	2.20786	1.44284	-0.355396
YPR032W	141	-2.53561	0.523313	-0.362262
YBR091C	141	0.972243	0.756128	-0.394267
YER024W	141	1.45346	0.93926	-0.413164
YBL105C	141	1.8035	0.890059	-0.467161
YMR129W	141	-1.28518	0.829045	-0.606906
YAL049C	141	0.396048	-0.0214965	-0.834243
YNL116W	141	2.16443	1.80422	-0.894839
YGR083C	141	0.391035	0.466735	-0.922394
YER031C	141	2.05856	1.35897	-0.999757
YBL066C	141	0.0350539	0.506923	-1.30153
YOR196C	141	1.12222	0.747756	-1.3134
YDR076W	140	-0.196986	0.925207	3.07179
YLR045C	140	0.217394	0.201605	2.51806
YMR033W	140	0.646989	0.746373	1.80157
YOL041C	140	1.64434	1.29782	1.65098
YEL030W	140	0.478467	1.03211	1.53857
YJL128C	140	1.55866	1.06506	1.38528
YER049W	140	1.65207	1.16035	1.07364
YIL064W	140	1.13167	0.728501	0.905979
YGR191W	140	1.52389	0.8379	0.73675
YDL134C	140	1.62026	0.949643	0.722776
YIL123W	140	1.35911	0.935507	0.474943
YOR361C	140	1.29554	0.783019	0.453896
YGR141W	140	1.01799	0.23407	0.230908
YHR138C	140	1.50423	1.42205	0.225656
YKL069W	140	1.16908	0.748543	0.222986
YLR033W	140	1.1023	0.560907	0.189692
YOR061W	140	2.59866	1.77133	0.151617
YNL283C	140	2.68065	1.55959	0.0921229
YOR077W	140	1.5686	0.791726	0.00572571
YMR214W	140	1.21016	0.694263	-0.00236
YPR071W	140	1.40255	0.962389	-0.0174314
YDL135C	140	0.606182	0.520571	-0.0346129
YJL181W	140	1.53049	0.853196	-0.0703957
YJL156C	140	0.688029	0.688907	-0.0984643
YER118C	140	1.20307	0.848771	-0.123836
YNL003C	140	1.58745	1.06191	-0.164157
YKR003W	140	2.13276	1.50069	-0.20923
YLL014W	140	0.914753	0.646709	-0.297619
YML103C	140	1.42787	0.831364	-0.37977
YJL044C	140	1.41384	0.768811	-0.40321
YGR184C	140	1.16601	0.574659	-0.406046
YDR139C	140	0.847656	0.521514	-0.44273
YDR116C	140	0.0644271	0.894267	-0.446779
YGL215W	140	0.0618429	0.51751	-0.483933
YBL069W	140	1.46117	0.96493	-0.48795
YHL020C	140	1.32027	0.889001	-0.706853
YOR243C	140	1.45179	0.890779	-0.724935
YGR063C	140	0.994792	0.979714	-0.840614
YDL204W	140	1.26038	1.07783	-0.933377
YGL233W	140	0.615143	0.771734	-1.02594
YGL026C	140	0.671566	0.446435	-1.1246
YEL048C	140	0.791071	0.247871	-1.43129
YHR072W-A	139	1.1331	1.3863	2.39157
YER044C	139	1.83773	1.27017	1.76067
YPL241C	139	1.3261	0.970927	1.06311
YFL007W	139	1.39931	0.52252	0.955678
YKL181W	139	1.01688	0.164917	0.800141
YER154W	139	1.39392	1.04947	0.791612
YJR054W	139	1.345	0.635494	0.690065
YLR083C	139	1.18801	0.768719	0.661722
YPR133W-A	139	1.83149	1.17292	0.592907
YHL003C	139	1.6862	1.23212	0.521017
YMR162C	139	0.90811	0.393755	0.306752
YKR035W-A	139	0.816951	0.172944	0.300158
YBR221C	139	1.76414	1.00134	0.278812
YDR144C	139	1.77392	1.12071	0.251091
YJL060W	139	0.966514	0.725326	0.232663
YGR251W	139	1.49426	1.13365	0.20327
YGR260W	139	1.29921	0.681242	0.176499
YLR265C	139	0.588122	0.662601	0.113912
YGR081C	139	2.11581	1.43602	0.0623669
YDL116W	139	0.775671	0.874058	0.0328396
YDL211C	139	1.25369	0.916973	-0.0034777
YOR322C	139	1.37743	0.875288	-0.0163504
YKL100C	139	1.61003	1.32158	-0.0178921
YNL281W	139	1.43182	0.845604	-0.0693691
YGL247W	139	0.715782	0.258253	-0.0812137
YBR269C	139	1.16344	0.88626	-0.128386
YMR049C	139	0.72584	0.820581	-0.172755
YGL140C	139	1.02254	0.525178	-0.208031
YIL002W-A	139	1.2843	0.5674	-0.247551
YDR150W	139	1.9083	1.23477	-0.258859
YNR075C-A	139	0.922134	0.138051	-0.263539
YDR176W	139	1.58394	0.922732	-0.287001
YGL011C	139	1.22937	0.880113	-0.313304
YBR213W	139	0.972265	1.17395	-0.339659
YGL222C	139	1.49496	1.23557	-0.651904
YFR050C	139	0.649945	0.993292	-0.765419
YDR427W	139	1.59857	1.14595	-0.838424
YNL261W	139	-0.736912	0.367248	-0.841699
YOR036W	139	1.16384	0.433982	-0.932611
YCR038C	139	0.236742	0.0912468	-1.03062
YMR178W	138	-0.057008	0.413204	3.95538
YNR052C	138	1.26733	0.601717	1.74445
YHR171W	138	0.804072	0.43438	1.57328
YEL002C	138	0.785186	0.480378	1.27995
YDR457W	138	0.593857	0.730903	1.27657
YKL203C	138	0.533872	0.55912	1.00998
YIL051C	138	1.69665	1.54823	0.962607
YNL147W	138	1.82032	1.3103	0.931056
YDR349C	138	1.87284	1.18035	0.681942
YOR276W	138	1.49139	1.12466	0.681787
YIL145C	138	0.593519	0.208584	0.584845
YPL266W	138	0.594141	0.883943	0.553006
YBR201W	138	1.66434	1.4805	0.502465
YMR281W	138	1.35919	0.821185	0.497311
YMR217W	138	0.937299	0.192505	0.460907
YBR122C	138	1.0185	0.557688	0.349561
YBR171W	138	0.940646	-0.020658	0.326143
YML107C	138	0.247481	0.862209	0.287358
YER047C	138	1.8408	0.962425	0.233349
YOR033C	138	1.60208	0.947623	0.185046
YPL193W	138	1.11408	0.813422	0.0522826
YLR405W	138	0.786578	0.660743	0.0361449
YCL024W	138	1.35307	0.210375	-0.0191014
YPR115W	138	1.18227	0.624296	-0.0266217
YPL154C	138	1.80383	1.06567	-0.0493333
YPR148C	138	0.980273	0.644791	-0.135903
YOL052C	138	1.87061	1.49048	-0.233325
YER060W	138	1.02575	0.643184	-0.248304
YGL238W	138	1.11968	0.695419	-0.361836
YMR168C	138	1.32466	1.11103	-0.382401
YDR141C	138	1.12019	0.381081	-0.389283
YGL003C	138	1.17531	0.896315	-0.500416
YNL248C	138	1.6115	0.827641	-0.573406
YPR181C	138	1.45084	1.04364	-0.574817
YJL155C	138	-0.197875	0.663409	-0.649612
YMR308C	138	0.0446754	0.297088	-0.744399
YHR196W	138	0.780304	0.346983	-0.879858
YDL225W	138	1.66859	0.833412	-0.939611
YGL023C	138	1.63853	1.09307	-1.22527
YFR028C	138	1.66085	1.0181	-1.41581
YIL031W	137	1.10002	0.577242	1.88721
YGL078C	137	0.572569	0.410688	1.62077
YMR238W	137	1.6157	1.12771	1.56346
YLR446W	137	0.924315	0.459496	1.13559
YHR079C	137	1.17109	1.02742	1.13351
YOR285W	137	1.31369	0.910721	1.00582
YDL199C	137	1.3325	0.83238	0.985499
YDR063W	137	0.335852	0.460586	0.712316
YDR517W	137	1.87385	1.07927	0.695698
YKL053C-A	137	1.15108	0.794847	0.681464
YLL013C	137	1.69702	1.51857	0.300355
YBR127C	137	0.999755	0.927068	0.249721
YDR449C	137	1.60585	0.821977	0.216199
YLR363W-A	137	0.303731	1.18877	0.0780482
YPL008W	137	1.78516	0.93348	0.0538445
YBR015C	137	1.06409	0.559769	0.0330723
YNL242W	137	1.07566	0.215599	0.0121204
YDR120C	137	1.45023	0.724693	0.00920657
YER018C	137	1.45445	1.13371	0.00656861
YOL135C	137	1.64518	1.23309	-0.00635474
YDR429C	137	1.17881	0.605507	-0.0515927
YNL255C	137	1.41779	0.994442	-0.0605365
YIL029C	137	1.15697	0.766563	-0.0648642
YBR058C-A	137	1.15189	0.995445	-0.0663912
YFL049W	137	1.24556	0.740592	-0.115635
YMR181C	137	1.19837	0.779385	-0.187745
YLR038C	137	1.3399	0.90372	-0.195395
YDR331W	137	1.26464	0.818663	-0.23273
YFL005W	137	1.13272	0.684691	-0.270909
YLR451W	137	1.31051	0.492508	-0.316861
YER067W	137	2.08517	1.28867	-0.375725
YIR037W	137	1.09319	0.588066	-0.433649
YNR004W	137	-0.189922	0.232078	-0.478118
YJL050W	137	0.952199	0.916778	-0.552432
YNL278W	137	1.64426	0.925513	-0.621948
snR82	137	0.543181	1.53172	-0.639218
YDL144C	137	1.36329	1.07805	-0.668918
YPR187W	137	1.42406	0.995245	-0.713579
YLR203C	137	1.98134	1.45094	-0.71901
YIR034C	137	1.51223	0.70395	-0.862977
YJR074W	137	0.694055	0.8653	-1.04857
YCR051W	137	1.13267	0.456315	-1.66827
YLR196W	136	0.799379	0.601069	1.65295
YMR127C	136	0.601431	0.672165	1.28729
YLR032W	136	1.22835	0.813856	1.11512
YGR023W	136	1.15217	0.787706	1.00738
YDL019C	136	1.65145	0.915916	0.990888
YJR070C	136	0.861657	0.790344	0.862496
YHL032C	136	0.955117	0.450321	0.631179
YDR069C	136	0.294758	1.16167	0.623432
YKL167C	136	1.13207	0.986671	0.56782
YDL183C	136	0.969143	0.554082	0.423202
YDL045W-A	136	1.38009	0.969315	0.357858
YEL050C	136	1.61611	1.57678	0.33834
YLR357W	136	1.80109	0.915068	0.337278
YBR154C	136	1.85702	0.644746	0.285951
YPR166C	136	1.54503	1.3804	0.283829
YNL124W	136	1.50008	0.873121	0.269863
YBR207W	136	1.00604	0.56684	0.113385
YGR012W	136	1.03729	0.975713	0.0639154
YPL186C	136	0.825457	0.518007	0.0447706
YDL092W	136	1.25654	0.939137	0.0124147
YOR148C	136	1.20777	0.667251	-0.00619191
YKR054C	136	1.09254	0.708063	-0.0853581
YGR295C	136	1.3888	0.5229	-0.12132
YDR423C	136	0.773388	0.895363	-0.193147
YBL058W	136	0.796722	0.747687	-0.221403
YHR048W	136	1.86913	1.37515	-0.22974
YBR132C	136	1.1865	0.389015	-0.25818
YNL032W	136	1.55781	1.53069	-0.307719
YLR228C	136	1.9765	1.25414	-0.329601
YDL008W	136	1.08328	0.677153	-0.352684
YLR139C	136	1.17456	0.736633	-0.364691
YAL025C	136	-0.885878	0.481625	-0.460001
YDR243C	136	1.5225	0.940374	-0.505754
YLL039C	136	1.6669	0.63211	-0.514251
YPR025C	136	1.1979	0.774575	-0.571207
YML030W	136	1.12967	0.492704	-0.761688
YHR069C	136	0.797216	0.622631	-0.894006
YLR244C	136	0.93565	0.507119	-0.944176
YFR037C	136	0.922443	0.481799	-0.973534
YCR043C	136	1.06314	0.942563	-1.16006
YAL014C	136	1.27076	0.768824	-1.25699
YPL002C	136	0.487049	0.480219	-1.38703
YER133W	135	1.70053	0.934733	2.01075
YER072W	135	1.79233	1.81487	1.83149
YDR302W	135	1.46305	0.677811	1.71385
YDL053C	135	-0.244142	0.940189	1.56293
YHR085W	135	0.695084	0.603618	1.55338
YPL043W	135	0.585181	0.83313	0.889158
YOL130W	135	1.45884	0.992596	0.874547
YLL062C	135	0.769408	0.353372	0.609316
YLR429W	135	-0.0104904	0.426	0.595967
YGR110W	135	1.6911	0.99876	0.557657
YLR273C	135	1.3342	0.684474	0.544116
YBR085C-A	135	1.89396	1.43989	0.535676
YPR041W	135	1.38685	0.8433	0.4789
YLR138W	135	1.19425	0.929102	0.375155
YOR086C	135	1.9329	1.33846	0.293052
YKL120W	135	2.64347	1.77791	0.261974
YNL191W	135	1.27208	0.638903	0.199133
YKL067W	135	1.7548	1.58822	0.195439
YNL101W	135	1.50161	1.05364	0.162031
snR68	135	0.457046	0.405113	0.103332
YMR047C	135	1.08598	0.917281	0.0462
YLR126C	135	1.28616	0.754191	0.0377422
YPL087W	135	0.969696	0.939352	-0.00216296
YGL014W	135	0.613984	0.447771	-0.03288
YPL100W	135	0.900024	0.587284	-0.0494407
YGL224C	135	0.951539	0.944474	-0.18193
YMR079W	135	1.49955	1.42109	-0.237713
YER025W	135	1.34877	0.867196	-0.271494
YBR130C	135	0.842366	0.503741	-0.28795
YNL024C-A	135	0.813626	0.718256	-0.341841
YNL308C	135	0.615913	0.833205	-0.368484
YPR129W	135	1.45313	0.873884	-0.383337
YML110C	135	1.12078	0.768084	-0.389873
YMR263W	135	1.31515	1.13535	-0.427045
YDL155W	135	2.29083	1.41133	-0.452705
YIL062C	135	1.76337	1.23569	-0.519252
YBR290W	135	1.31827	1.14075	-0.591272
YPR022C	135	0.316235	0.640238	-0.621053
YJR077C	135	1.54822	0.85427	-0.653037
YNL039W	135	1.08792	0.929585	-0.694304
YGL115W	135	1.81504	1.355	-0.838313
YIR012W	135	1.68948	0.741124	-0.891238
YPR088C	135	0.961287	0.574353	-0.98982
YMR200W	134	0.756382	0.790521	4.34682
YPL249C-A	134	2.73915	1.95169	3.91869
YDL028C	134	-0.53951	0.58559	2.49122
YHL047C	134	1.25023	0.389113	1.78592
YCR030C	134	1.00783	0.980375	1.38055
YHR050W	134	2.21634	1.52397	1.36622
YDR257C	134	0.462439	0.422169	1.12793
YOR109W	134	1.23771	0.904103	0.826651
YPR031W	134	1.42217	0.993797	0.680327
YBL031W	134	1.06553	0.316197	0.613551
YER008C	134	0.901516	0.435499	0.610843
YOR227W	134	1.58646	1.32558	0.544585
YPL228W	134	0.62601	1.12853	0.520777
YPL264C	134	0.518813	0.492658	0.436166
YGR156W	134	1.53988	1.04586	0.350753
YGR143W	134	1.20597	0.924019	0.290057
YBR141C	134	1.79993	1.06216	0.238134
YMR202W	134	2.86572	1.47511	0.17917
YLR152C	134	0.797201	0.649046	0.109596
YOR281C	134	1.3488	0.970902	0.104113
YNL189W	134	1.70106	1.06963	0.101703
YGL162W	134	0.91396	0.710866	0.0777806
YJL092W	134	1.00561	0.590354	0.0631433
YBR028C	134	-1.32269	0.479152	0.0424604
YIL125W	134	1.49476	1.02061	-0.0914388
YGR221C	134	0.984636	0.746284	-0.123122
YER094C	134	1.84279	1.44663	-0.186212
YMR280C	134	2.04212	1.33271	-0.210475
YDL189W	134	1.07412	0.729843	-0.235863
YDR388W	134	1.4656	0.946874	-0.26354
YPL253C	134	2.13976	1.5659	-0.383455
YPR052C	134	0.64771	0.372975	-0.415475
YBL095W	134	1.90508	0.855051	-0.435869
YPL240C	134	1.75872	1.10903	-0.45542
YNL291C	134	1.03659	0.859503	-0.480114
YJL124C	134	1.38953	0.555942	-0.488418
YPL105C	134	0.994296	0.799171	-0.527285
YJR093C	134	0.648242	0.924819	-0.579773
YJL061W	134	0.974249	0.790988	-0.785563
YER040W	134	1.10634	0.407658	-0.805054
YIR031C	134	1.17941	0.822763	-0.851531
YLL012W	134	1.14484	1.06919	-0.994204
YJL208C	134	1.13869	0.543472	-1.13207
YDR468C	133	0.872571	0.671632	2.7562
YPR198W	133	0.669815	0.842256	1.90601
YCR020W-B	133	1.53163	1.14021	1.76454
YPL152W	133	1.38491	0.810154	1.4566
YCL012C	133	1.01533	0.766153	1.4117
YMR165C	133	2.00276	1.37672	1.38825
YKL179C	133	1.03077	0.779768	1.23301
YHR110W	133	1.34525	0.942861	0.838683
YOR058C	133	-1.12419	0.960731	0.835514
YFL008W	133	0.768816	0.76518	0.796806
YOR287C	133	1.16532	0.410407	0.792191
YDL005C	133	0.669334	0.61032	0.786492
YGR061C	133	0.961372	0.689355	0.661384
YGR209C	133	1.06224	0.798433	0.578317
YBL103C	133	1.99012	1.27018	0.400783
YLR321C	133	1.40374	0.857903	0.294571
YPR010C-A	133	1.31967	0.944361	0.258662
YPL268W	133	0.267951	0.765032	0.251614
YHR208W	133	1.57414	1.06175	0.204541
YNL157W	133	0.762738	0.213792	0.17218
YBR073W	133	1.68727	1.24773	0.0890504
YDR016C	133	1.24162	0.842099	0.0649624
YGR002C	133	0.694774	0.18717	-0.147858
YIL078W	133	1.30397	1.29355	-0.159829
YGR057C	133	1.49687	1.00687	-0.253844
YLR389C	133	1.94259	1.48804	-0.263339
YAL030W	133	0.863735	0.496556	-0.309048
YNL022C	133	1.55897	0.98094	-0.320377
YJL053W	133	0.0208729	0.662556	-0.324055
YIR004W	133	0.535834	0.810868	-0.337904
YNL044W	133	0.986697	0.450965	-0.418863
YHR090C	133	0.884267	0.874562	-0.576479
YNL074C	133	1.57619	0.932838	-0.602067
YBL021C	133	1.33476	0.876399	-1.11512
YMR180C	133	-1.15697	0.46406	-1.22837
YBR247C	132	1.51237	0.823827	2.72097
YBR086C	132	0.93962	1.09894	2.70427
YOR291W	132	1.0876	1.00509	2.21169
YKL034W	132	0.322	0.640205	1.4134
YGR253C	132	1.28837	1.06938	1.21696
YBR123C	132	1.57955	1.60504	1.21237
YNL299W	132	1.26277	0.372176	0.913745
YJR154W	132	1.43257	0.938709	0.909962
YOL110W	132	1.86281	1.24537	0.735186
YIL102C-A	132	1.75715	1.30409	0.668973
YHR028C	132	1.22916	1.22108	0.578329
YKL135C	132	-0.554032	0.489492	0.466155
YBR160W	132	0.0162758	0.99836	0.432881
YBL006C	132	2.62074	2.03453	0.349694
YOR307C	132	0.836814	0.731404	0.32499
YER048C	132	1.84957	1.22201	0.305544
YHR117W	132	1.18493	1.15872	0.294242
YDL093W	132	0.899446	0.382296	0.220788
YNL131W	132	0.726745	0.702588	0.198921
YCR089W	132	1.21333	0.478344	0.186636
YJR137C	132	1.5172	1.00442	0.154315
YKL101W	132	2.20396	1.3115	0.153684
YFR018C	132	1.24251	0.614482	0.109277
YDR283C	132	0.824948	1.19167	0.101535
YBR125C	132	1.38247	0.836433	0.0430864
YJR004C	132	1.50164	0.90407	0.030947
YML117W	132	1.68533	0.859386	0.0302371
YLR057W	132	0.529433	0.416353	-0.0363
YEL016C	132	1.30997	0.820552	-0.0715803
YJL005W	132	0.220233	0.0238788	-0.122194
YER129W	132	1.13439	0.661938	-0.130897
YNL097C	132	1.31406	0.789259	-0.149379
YMR034C	132	1.43347	0.867995	-0.15199
YBR041W	132	1.88691	1.66491	-0.204747
YOR341W	132	-1.28473	0.275107	-0.249573
YDL194W	132	1.12115	0.454658	-0.259989
YOL027C	132	1.34036	0.916389	-0.288458
YPR037C	132	0.991488	0.483633	-0.35527
YBR286W	132	0.0309235	0.738922	-0.382992
YNL297C	132	0.845127	0.730395	-0.390686
YDR018C	132	1.07357	1.00386	-0.406219
YGR113W	132	1.44901	1.03225	-0.471158
YHR116W	132	1.98409	1.57369	-0.50153
YGL129C	132	0.65015	0.882303	-0.622841
YMR153W	132	0.721789	0.530695	-0.628458
YMR191W	132	1.55742	0.70982	-0.648383
YGR201C	132	0.373124	0.28582	-0.750073
YMR236W	132	1.84362	1.38631	-0.779409
YLL033W	132	1.29285	0.830045	-0.902714
YGR007W	132	1.12272	0.975133	-0.932726
YDR356W	132	0.423995	0.455986	-0.974823
YAL011W	132	0.500539	0.325012	-1.07427
YBR236C	132	0.715465	0.822617	-1.53225
YNL038W	131	0.676766	0.749525	2.30034
YDR495C	131	-1.20652	0.11348	1.86976
YOR308C	131	0.17036	0.553553	1.81914
YHR136C	131	0.989521	0.561002	1.79567
YJL149W	131	2.019	1.50543	1.76627
YPR098C	131	1.06464	0.903351	1.62226
YML130C	131	1.24863	0.895162	1.58135
YDL168W	131	1.08573	0.428873	1.44324
YCR016W	131	1.30005	0.536922	1.29292
YMR205C	131	-0.323829	1.04956	1.24076
YJL045W	131	1.09522	0.381745	0.79988
YIL076W	131	1.09699	0.783986	0.790268
YGR108W	131	1.06655	0.561884	0.753919
YOR354C	131	1.65252	1.20755	0.676322
YGL203C	131	1.33026	0.733298	0.620527
YDR122W	131	1.58153	1.07669	0.577343
YPL175W	131	1.03062	0.733658	0.492061
YDR260C	131	1.51853	1.14104	0.486604
YPR020W	131	1.03672	0.506515	0.353253
YJR130C	131	1.12596	1.07659	0.336693
YDR281C	131	1.27163	0.822436	0.301506
YNL077W	131	1.39145	0.705237	0.2531
YNL272C	131	0.478092	0.237213	0.231541
YLR337C	131	1.06124	0.407834	0.229518
YGL028C	131	2.24587	1.36409	0.112223
YBR146W	131	1.33175	0.999686	0.102357
YLR431C	131	1.30507	0.746604	-0.0825718
YOL083W	131	0.83426	0.792673	-0.0873221
YGL009C	131	1.22924	0.634264	-0.169169
YDR111C	131	1.34491	0.854989	-0.195708
YKR004C	131	0.305937	0.861972	-0.233603
YER030W	131	1.30901	0.962469	-0.240718
YKR016W	131	1.71816	1.14781	-0.279147
YIL108W	131	1.09015	0.798655	-0.281953
YOR002W	131	1.18993	0.66167	-0.325953
YLR336C	131	0.0581473	-0.0388641	-0.402211
YLR060W	131	1.2814	0.715634	-0.430695
YDR422C	131	0.941884	0.648153	-0.48878
YPL063W	131	0.539507	0.714182	-0.534232
YLR219W	131	1.73579	1.10014	-0.559202
YOR090C	131	1.29686	0.845379	-0.646711
YNL238W	131	0.663108	0.395407	-0.669745
YBL007C	131	1.2117	0.857334	-0.674263
YDR115W	131	1.32802	1.11544	-0.748696
YAR007C	131	1.373	0.744259	-0.777015
YJL063C	131	1.98658	2.06427	-0.829249
YGL250W	131	1.76823	0.863521	-0.838292
YMR060C	131	0.946931	0.888745	-0.859661
snR33	131	1.99406	1.31603	-1.10927
YGR185C	131	1.34072	0.958676	-1.44274
YHR030C	130	1.6016	1.33115	4.07
YLR262C	130	1.4086	0.938185	2.13916
YDR147W	130	1.54627	1.13615	2.10976
YDR385W	130	1.52539	1.15024	1.57851
YLL048C	130	0.953097	0.71504	1.23497
YDR299W	130	1.935	1.61885	1.09387
YOL124C	130	0.968665	0.724935	1.06419
YLR277C	130	0.66122	0.182915	1.02738
YLR396C	130	-0.835485	0.528636	1.00455
YMR019W	130	1.1162	0.665152	0.92936
YBR140C	130	1.08709	0.709161	0.751698
YPR125W	130	2.18593	1.72015	0.734517
YNL041C	130	1.05204	0.915045	0.635463
YOR241W	130	0.407938	0.622845	0.559758
YDL029W	130	0.796139	0.716131	0.534433
YOR347C	130	1.30431	1.03967	0.437308
YLR419W	130	0.473834	0.198584	0.370779
YLR310C	130	0.866519	0.430646	0.305312
YML071C	130	1.51542	0.805375	0.280166
YJL082W	130	0.528369	0.639191	0.278128
YGL201C	130	0.751032	0.357621	0.107645
YIL138C	130	-0.584304	0.731688	0.0577831
YKR064W	130	1.36279	0.876948	0.0489708
YNL100W	130	1.64772	1.0775	0.00434846
YER141W	130	0.725069	0.600649	-0.0781969
YBR172C	130	1.06378	0.623843	-0.0898708
YLR234W	130	1.21278	0.768591	-0.138968
YBR107C	130	1.32072	0.66826	-0.158697
YGL092W	130	1.3839	0.508925	-0.176383
YCL026C-B	130	1.41855	0.912931	-0.26094
YHR169W	130	0.161875	0.328854	-0.340486
YNL025C	130	0.772969	0.983538	-0.369138
YJR144W	130	0.853786	1.31773	-0.384165
YLR417W	130	1.19446	0.786844	-0.424903
YDL232W	130	1.19397	0.639033	-0.443388
YDR087C	130	0.542638	0.109837	-0.517091
YIL155C	130	0.913	0.524162	-0.558431
YDR165W	130	0.972465	0.808857	-0.608389
YDR198C	130	-0.395723	0.361985	-0.738698
YCL044C	130	1.0654	0.533297	-0.831645
YER083C	130	1.38903	0.980001	-0.83831
YNL026W	130	-0.170922	0.548758	-0.9051
[truncated: 1,799 more rows]

## Sheet: Occupancy by Hmo1
	Hmo1	Rsc1	Rsc2
YLR048W	6.59515	2.22019	1.51531
YML024W	6.56966	2.67606	2.02101
YBL092W	6.44511	2.24366	1.71126
YBR191W	6.32402	2.08792	1.29416
YNL302C	6.27815	2.95485	2.10824
YHR141C	6.24827	2.68569	1.74601
YIL148W	6.23555	2.87495	2.01168
YPL090C	6.22292	1.9224	1.446
YLR185W	6.15881	2.50483	1.73154
YGR148C	6.15362	2.80448	1.97043
YNL162W	6.13497	3.22788	2.36014
YER102W	6.095	2.45537	1.86891
YER056C-A	6.07135	3.38027	2.5668
YEL054C	6.04575	2.15609	1.36871
YDL075W	5.98864	2.2108	1.60064
YDR418W	5.89514	2.98498	2.18956
YLR448W	5.86216	2.86259	2.1703
YKL180W	5.85181	2.55928	1.7343
YDR471W	5.80875	2.6993	2.08858
YOR312C	5.77251	2.28844	1.47252
YGL189C	5.73671	2.55901	1.6576
YML073C	5.7167	2.3279	1.4905
YML064C	5.68692	2.58142	1.91624
YPL143W	5.68152	2.81097	2.24612
YGL031C	5.67307	2.41757	1.68408
YIL018W	5.6524	1.70483	1.55974
YJR145C	5.63872	2.62323	1.68796
YKL006W	5.60014	2.40201	1.81636
YBL028C	5.58863	2.2571	1.68158
YHR021W-A	5.58831	2.52243	2.44498
YER117W	5.57202	2.5643	1.86
YOR234C	5.5474	2.79299	1.92724
YGR118W	5.5315	2.28692	1.41845
YOR293W	5.52779	2.95694	1.98317
YIL133C	5.51197	2.58235	2.00939
YER074W	5.47556	2.99645	2.16773
YDL082W	5.47078	2.76336	2.50685
YJL136C	5.41881	2.58108	1.53905
YML026C	5.4168	2.17969	1.53136
YJL189W	5.36348	3.00545	2.21545
YIL052C	5.34736	3.01516	2.18227
YMR242C	5.28906	3.10573	2.22156
YBR084C-A	5.2615	2.73439	1.93376
YNL069C	5.21532	2.48733	1.64614
YDR025W	5.19768	2.48743	1.87108
YJR123W	5.15093	2.43871	1.71716
YPR131C	5.11965	3.18844	2.32721
YHR203C	5.09255	2.47206	1.74003
YGR214W	5.0744	2.66947	1.93606
YIL069C	5.06186	1.89795	1.43087
YMR143W	5.05143	3.22745	2.20733
YDL076C	5.02556	2.77018	2.02295
YHR010W	4.91972	3.11158	2.22069
YBL071C-B	4.91681	2.51675	1.68834
YBR181C	4.86899	3.16714	2.12127
YBR048W	4.7742	3.31682	2.32796
YLR406C-A	4.7668	3.08889	2.29229
YJL033W	4.64151	1.09939	0.877636
YJL178C	4.62546	2.97548	2.20524
YDR450W	4.58131	3.32097	2.28318
YDR174W	4.56267	2.50962	1.75155
YIL149C	4.54691	1.78363	1.32272
YOR096W	4.44602	3.20585	2.2293
YMR200W	4.34682	0.756382	0.790521
YNL097C-B	4.2513	2.27668	1.68483
YGR090W	4.09147	3.0458	1.81824
YHR030C	4.07	1.6016	1.33115
YMR056C	4.04409	3.29982	2.44268
YOL039W	4.03375	2.69647	1.98434
YNL096C	4.0211	3.32018	2.32082
YCR031C	4.01542	3.0735	2.14388
YMR178W	3.95538	-0.05701	0.413204
YPL249C-A	3.91869	2.73915	1.95169
YDR524C	3.82436	1.49929	1.61133
YLR344W	3.79642	2.8617	1.87955
YLR340W	3.72554	2.22792	1.62252
YDL191W	3.72371	2.96202	2.08495
YPL015C	3.70846	3.17887	2.3852
YJL110C	3.60992	1.54068	1.0817
YLR250W	3.59838	0.994582	0.765061
YOR021C	3.55914	1.6823	1.42039
YMR102C	3.54724	2.83284	2.2127
YBL093C	3.49045	1.92139	1.30733
YOR161C	3.47411	2.71183	1.90894
YMR258C	3.44665	0.233876	0.408879
YER145C	3.33955	2.38854	1.9083
YMR257C	3.27069	0.304027	0.447722
YLR333C	3.24941	2.61866	1.70956
YLR404W	3.24156	-0.39902	0.967221
YMR039C	3.18434	0.60494	0.74326
YDR076W	3.07179	-0.19699	0.925207
YLR355C	2.96705	2.70736	1.80829
YAL062W	2.88197	0.213113	0.856871
YNL188W	2.86409	-0.0905	0.691241
YLL028W	2.83823	2.87172	2.11518
YOR153W	2.82849	2.01248	1.37756
YLR197W	2.81374	0.6266	0.855201
YDR468C	2.7562	0.872571	0.671632
YLR061W	2.75194	2.65271	1.66593
YDR500C	2.74962	4.36177	3.69646
YNL267W	2.74088	0.776442	0.29284
YBR247C	2.72097	1.51237	0.823827
YIL106W	2.7152	1.45847	1.93859
YEL017W	2.71096	0.623789	0.889954
YBR086C	2.70427	0.93962	1.09894
YMR194W	2.68783	2.18739	1.4966
YML075C	2.68309	0.620879	0.710577
YDL133C-A	2.64054	2.41371	1.7457
YBR164C	2.62778	1.00343	0.781421
YOR154W	2.62049	-0.48359	0.385962
YKR091W	2.61861	0.924681	0.795518
YAL002W	2.61092	0.175842	0.689393
YGR085C	2.60536	3.19228	2.23703
YKL041W	2.59849	0.165564	0.968073
YPL059W	2.59436	0.850728	1.07914
YPL051W	2.57929	0.891137	0.632808
YFL025C	2.54791	0.977363	0.763086
YOR046C	2.54596	0.589286	0.770285
YLR084C	2.5437	1.53385	0.999617
YGL001C	2.5312	0.231846	0.481592
YKL085W	2.52914	2.75107	1.97401
YLR045C	2.51806	0.217394	0.201605
YBR061C	2.51755	-0.03643	0.407958
YDL028C	2.49122	-0.53951	0.58559
YDR447C	2.46455	2.91504	2.1051
YOR138C	2.46206	3.23451	2.4372
YCR019W	2.44212	0.592926	1.21314
YJR090C	2.435	0.1445	0.322105
YLR412C-A	2.42815	2.4869	1.70457
YEL026W	2.39571	-0.17778	0.872934
YHR072W-A	2.39157	1.1331	1.3863
YDR496C	2.38774	0.430058	0.397422
YPR005C	2.37567	1.76101	1.32898
YJL158C	2.36088	2.98931	1.95077
YLR074C	2.3538	2.22645	1.54719
YPR145W	2.34437	2.76243	1.9837
YMR122W-A	2.32633	2.431	1.79106
YFR032C-B	2.32094	2.79387	1.92315
YHL016C	2.32022	2.97939	2.44697
YNL038W	2.30034	0.676766	0.749525
YER152C	2.2987	1.3086	0.66881
YPL146C	2.28969	1.74293	1.21084
YNL010W	2.27919	1.06625	1.25138
YLR388W	2.26419	3.12255	2.30906
YJL132W	2.25307	0.572119	0.849972
YGL004C	2.22131	1.03818	0.598171
YCL063W	2.21866	2.46695	0.960088
YHR161C	2.21833	2.87541	2.00977
YBR022W	2.21806	0.326648	0.404246
YOR291W	2.21169	1.0876	1.00509
YCL038C	2.20138	1.05871	0.771008
YOR212W	2.1936	2.33404	1.75119
YGL032C	2.19299	1.78445	1.32011
YER002W	2.18744	0.458877	1.29948
YPL140C	2.1778	0.97723	1.01436
YNL211C	2.17563	-0.2662	0.525047
YDR245W	2.17101	0.884712	0.92959
YJR118C	2.1679	0.88878	0.952745
YGL035C	2.16555	2.8054	1.78722
YLR276C	2.1497	-0.74198	-0.08501
YJL192C	2.14797	3.3149	2.37132
YLR262C	2.13916	1.4086	0.938185
YDR247W	2.13674	2.55745	1.88661
YGR203W	2.12157	1.78935	1.84799
YLR167W	2.11941	2.70085	1.77899
YDR147W	2.10976	1.54627	1.13614
YDL192W	2.10059	2.1928	1.57532
YOR369C	2.08077	2.95316	2.02998
YGR237C	2.07072	1.44174	0.990904
YNL104C	2.05633	1.43592	1.12203
YNR016C	2.05046	2.90543	2.05854
YIL103W	2.04153	-0.19962	0.474982
YBR230W-A	2.03835	2.45051	1.87886
YGR034W	2.03257	2.72471	1.54351
YGR054W	2.03138	1.10866	1.04539
YNL102W	2.02579	0.422753	0.401974
YPR036W-A	2.01766	2.43425	1.69624
YER133W	2.01075	1.70053	0.934733
YPR070W	2.00824	0.324915	0.752482
YER107C	2.00753	0.432165	0.386098
YLR154C-H	2.00496	2.98909	1.95446
YKL060C	2.00492	2.58411	1.99585
YLR162W	1.9968	3.63672	2.83822
YDR155C	1.9904	1.93069	1.15291
YDR305C	1.98714	0.656155	0.88467
YHR001W	1.98514	0.077218	0.140206
YDR487C	1.98172	2.42186	1.74817
YHR104W	1.97878	0.946297	0.975747
YOR162C	1.97667	1.18453	1.27918
YDR089W	1.9736	1.86983	1.01236
YER165W	1.97062	1.24824	0.863366
YIL057C	1.9694	3.35391	2.55235
YHR004C	1.96485	1.10425	0.776646
YMR086W	1.96075	2.42763	1.74957
YDR160W	1.95658	0.719937	0.546864
YBL042C	1.9541	2.70924	1.92213
YNL066W	1.94529	2.29027	1.62446
YDR060W	1.9444	1.85514	1.04651
YLR441C	1.94008	4.33984	2.79906
YNL064C	1.93701	1.99853	1.76923
YJL159W	1.93429	2.35892	1.6141
YLR348C	1.93311	1.7022	1.30918
YDR389W	1.92836	2.02953	1.39417
YOR268C	1.92687	4.04287	3.14415
YBR069C	1.91669	2.37324	1.72484
YOR350C	1.91493	0.294536	0.51381
YBR203W	1.91146	3.01813	1.97839
YNL265C	1.91071	0.654358	0.836269
YNL002C	1.90909	1.09466	0.908484
YPR198W	1.90601	0.669815	0.842256
YKR029C	1.90544	-0.9982	0.93784
YBR183W	1.90187	2.51384	1.89526
YOR374W	1.89806	2.52931	1.66584
YBR248C	1.89639	1.23131	0.844226
YLR430W	1.89388	0.115272	0.192314
YML053C	1.89359	1.95022	1.35712
YEL006W	1.89286	0.804865	0.601257
YIL031W	1.88721	1.10002	0.577242
YDR495C	1.86976	-1.20652	0.11348
YPL079W	1.86845	2.69584	1.80353
YPR149W	1.86459	1.81772	1.57586
YNL178W	1.86176	2.29599	1.51801
YMR104C	1.85538	0.350352	0.443916
YLR106C	1.8531	-0.52826	0.488431
YOR178C	1.84389	0.941148	0.728584
YML101C	1.84317	2.82413	1.90798
YDR367W	1.84304	0.817641	0.910336
YOR274W	1.84225	3.23861	2.53796
YLR221C	1.84115	0.740673	0.328638
YOR107W	1.83912	2.90405	2.12499
YER072W	1.83149	1.79233	1.81487
YGL147C	1.82727	2.23304	1.62584
YBR083W	1.82701	0.489591	0.209596
YLR134W	1.81953	0.963071	0.450355
YOR308C	1.81914	0.17036	0.553553
YKR093W	1.81663	0.626139	0.241337
YPL125W	1.81505	-0.29942	0.327764
YPL028W	1.8114	2.24733	1.85535
YDR072C	1.81107	3.25389	2.37464
YPL082C	1.81021	2.90639	2.08899
YMR033W	1.80157	0.646989	0.746373
YGR055W	1.79593	3.06661	2.35763
YHR136C	1.79567	0.989521	0.561002
YLR409C	1.79316	0.459391	0.75823
YGR161W-C	1.79269	2.32114	1.77479
YJR133W	1.79258	0.674967	0.242068
YHL047C	1.78592	1.25023	0.389113
YCR026C	1.78556	0.781151	0.832283
YNL258C	1.7826	-0.1356	0.410929
YIL113W	1.77948	1.73847	1.17348
YHR078W	1.77491	0.816413	1.20145
YGL135W	1.76674	3.21057	2.16225
YJL149W	1.76627	2.019	1.50543
YCR020W-B	1.76454	1.53163	1.14021
YMR108W	1.76388	2.72775	1.9933
YDR021W	1.76151	1.07118	1.02675
YER044C	1.76067	1.83773	1.27017
YBL104C	1.75979	0.978663	0.950726
YDR074W	1.75471	1.817	1.27262
YKR094C	1.75375	3.34096	2.53946
YLL040C	1.75143	0.622616	0.472506
YNR052C	1.74445	1.26733	0.601717
YGR279C	1.74012	3.03531	2.22003
YDR043C	1.73762	2.23969	1.51405
YLR150W	1.73623	2.01801	1.36853
YHR043C	1.73459	1.221	1.05946
YMR105C	1.73176	1.84439	1.22894
YOL120C	1.73105	3.54383	2.59395
YPR104C	1.72944	1.07261	1.12767
YKR010C	1.72527	-1.64221	0.946334
YJR148W	1.72102	1.88679	1.27789
YDL130W	1.72081	3.31332	2.19297
YDL081C	1.7197	1.34651	1.31176
YGR235C	1.71968	1.20432	1.37059
YDR302W	1.71385	1.46305	0.677811
YDL015C	1.7137	-0.99023	1.17233
YKL080W	1.71265	1.79056	1.12514
YDL146W	1.71231	-0.28091	0.494307
YGR180C	1.71014	2.8755	1.96577
YOR143C	1.70805	0.893036	0.456026
YKL156W	1.70512	2.52063	1.73614
YLR109W	1.70352	1.21144	0.72402
YKL222C	1.69363	0.557944	1.11371
YDL136W	1.69356	3.2551	2.32225
YPR065W	1.69242	-1.71626	0.812924
YER131W	1.69186	3.43868	2.55345
YDR251W	1.68944	1.98311	1.38594
YBR118W	1.68815	2.31818	1.75235
YMR071C	1.68409	1.73032	1.28011
YHR183W	1.67417	1.7899	1.33231
YBR239C	1.67111	0.932499	1.41146
YBR092C	1.67063	0.592812	0.609233
YEL007W	1.66402	2.37244	1.19592
YHL010C	1.65934	1.08298	0.708998
YIR005W	1.65902	0.014266	0.774887
YPR101W	1.65794	1.01662	1.08411
YOL003C	1.65526	1.00459	0.922815
YLR156C-A	1.65523	2.81713	1.94555
YLR196W	1.65295	0.799379	0.601069
YOL041C	1.65098	1.64434	1.29782
YLR350W	1.65055	2.09172	1.72119
YMR121C	1.64956	1.55867	1.23796
YJL042W	1.64773	2.00244	1.54546
YBR143C	1.6472	2.25238	1.87904
YGL168W	1.64643	-0.66419	0.345275
YER136W	1.64414	1.5899	0.97428
YBR251W	1.64264	1.31672	1.48604
YGR008C	1.64046	1.87351	1.20554
YKL063C	1.63465	2.39726	1.72588
YGL103W	1.63317	3.45004	2.3125
YJR051W	1.62608	0.86262	0.827928
YER164W	1.62573	-0.1018	0.31856
YGL076C	1.62347	1.9963	1.17368
YDR275W	1.62275	2.80175	2.21107
YPR098C	1.62226	1.06464	0.903351
YGL078C	1.62077	0.572569	0.410688
YGR212W	1.61806	0.094752	0.311067
YPL137C	1.61451	1.65015	1.21682
YMR080C	1.61407	0.7683	0.92391
YML068W	1.61365	-0.76786	0.816869
YGL056C	1.6077	2.98173	2.29035
YOR101W	1.59748	2.12084	1.8937
YGL249W	1.59275	-0.43498	0.547545
YER070W	1.58836	1.92941	1.16564
YDR252W	1.58512	0.561054	0.688481
YPL055C	1.58248	3.40275	2.45353
YML130C	1.58135	1.24863	0.895162
YAL029C	1.57978	1.31861	2.25853
YPL049C	1.57873	2.06171	1.32673
YDR385W	1.57851	1.52539	1.15024
YHR171W	1.57328	0.804072	0.43438
YMR110C	1.57308	-0.50457	0.781214
YLR157C-C	1.57284	2.39008	1.67394
YOR057W	1.56791	1.13278	0.67313
YCR004C	1.56744	1.63699	1.29337
YBL004W	1.5665	1.69091	0.787855
YNL065W	1.56638	2.10587	1.4911
YMR238W	1.56346	1.6157	1.1277
YDL053C	1.56293	-0.24414	0.940189
YPL058C	1.56245	2.65796	2.00738
YBR200W	1.55802	0.732339	0.598073
YHR085W	1.55338	0.695084	0.603618
YPL131W	1.55191	2.83049	1.74118
YJL210W	1.55067	2.68842	1.97552
YBR240C	1.55044	2.9466	2.32313
YBR112C	1.54942	1.69129	0.805494
YLR325C	1.54363	3.26911	2.30997
YJR120W	1.54254	3.30155	2.40956
YDR339C	1.53991	0.913554	0.760901
YMR244C-A	1.53884	1.93694	1.14059
YEL030W	1.53857	0.478467	1.03211
YBL030C	1.53135	2.70964	2.24097
YHR011W	1.53103	0.150258	0.217057
YLR256W	1.52944	3.01775	2.07255
YIL001W	1.52871	-0.27131	0.933134
YLR159C-A	1.52852	2.12329	1.48397
YKR090W	1.52754	1.51528	2.93086
YHR097C	1.52644	1.65418	1.03473
YGL202W	1.52441	0.923058	0.785462
YJR104C	1.51424	2.48242	2.17739
YNR014W	1.51352	2.22528	1.42013
YGL100W	1.51338	0.900795	0.830225
YGR037C	1.51332	1.7198	1.06738
YCL054W	1.51317	0.923616	0.697697
YDR068W	1.51237	0.746948	0.673534
YNL185C	1.50842	0.119638	0.562994
YFR010W	1.50623	1.26726	0.637674
YDR369C	1.506	-0.75112	0.744458
YMR132C	1.50408	-3.51204	0.79326
YNL082W	1.50135	0.379914	0.925202
YJL039C	1.50115	2.01907	1.02891
YLR215C	1.49682	0.506691	0.84273
YER046W	1.4965	1.92603	1.43037
YOR051C	1.49469	1.95005	1.44718
YMR037C	1.49413	1.33702	1.04367
YDR212W	1.49399	0.778396	1.0504
YNL016W	1.49351	1.13709	1.26364
YHR022C-A	1.49183	1.57429	0.926388
YNL068C	1.49039	2.66781	1.86402
YBL002W	1.48962	2.43851	1.72578
YOL132W	1.48892	0.954276	0.906811
YPL046C	1.48522	0.261	0.992698
YGR199W	1.48457	-0.74365	0.719067
YBL029C-A	1.48172	3.12438	2.1986
YLR454W	1.47982	1.44369	1.22399
YDR079W	1.47818	0.846084	0.806529
YDL048C	1.47541	1.67215	1.26559
YGR014W	1.47471	2.7688	2.01472
YOR211C	1.47129	1.30509	1.03878
YCL030C	1.46385	0.781423	1.05601
YHR045W	1.46372	1.51627	1.23462
YBR094W	1.46041	1.17507	0.749152
YDR044W	1.45744	2.44137	1.74067
YPL152W	1.4566	1.38491	0.810154
YER096W	1.45633	1.38141	0.593659
YLR189C	1.45432	2.29781	1.76605
YLL045C	1.45254	2.13405	1.95968
YBR081C	1.44784	-0.0471	0.164041
YDL168W	1.44324	1.08573	0.428873
YGR027C	1.43993	3.30787	2.54281
YER177W	1.43579	2.72318	1.78584
YDR064W	1.43239	2.63465	1.87836
YIL049W	1.42957	0.098738	1.08192
YGR271C-A	1.4273	0.905617	0.765539
YGR193C	1.42634	1.28796	0.646015
YGR218W	1.42621	0.441356	0.783715
YPL124W	1.41421	0.36747	0.389592
YDL184C	1.41379	3.27643	2.18475
YKL034W	1.4134	0.322	0.640205
YDL084W	1.41196	1.21887	0.961612
YCL012C	1.4117	1.01533	0.766153
YGL123W	1.41153	3.68664	2.75424
YBR201C-A	1.41033	2.38569	1.64435
YGL191W	1.40352	1.43322	1.09685
YPL177C	1.39721	1.35457	0.918756
YER148W	1.39573	0.725662	0.438313
YPL004C	1.39473	1.8998	1.34899
YDR522C	1.39444	-0.93948	0.365332
YBL052C	1.39205	0.005273	0.260435
YKL078W	1.38925	0.995628	0.266605
YMR165C	1.38825	2.00276	1.37672
YJL128C	1.38528	1.55866	1.06506
YPR137W	1.384	2.22643	1.52121
YDR229W	1.38346	1.02057	1.46636
YBR157C	1.38276	2.15484	1.56689
YCR030C	1.38055	1.00783	0.980375
YOL125W	1.3795	3.32917	2.60596
YBR077C	1.3749	2.95464	2.08854
YBR080C	1.37235	1.52647	1.24845
YBR243C	1.37152	1.38877	1.43853
YNL149C	1.36808	3.55912	2.71489
YHR050W	1.36623	2.21634	1.52397
YMR195W	1.36493	0.641304	0.894781
YBL036C	1.36464	1.15227	0.918855
YKL133C	1.36394	0.348841	0.565438
YKR092C	1.35773	2.87041	2.05733
YDL180W	1.35712	1.56483	1.62989
YGR157W	1.35567	2.14309	1.63485
YDR270W	1.35458	1.84896	1.29767
YLR455W	1.35325	-0.46033	0.172985
YNL277W-A	1.35187	1.71383	0.875361
YBR238C	1.34746	2.51648	1.72085
YPL111W	1.34743	3.177	2.1367
YMR001C-A	1.34675	1.925	1.23115
YJL145W	1.34331	1.26588	1.16244
YPR073C	1.34178	0.239989	0.327719
YGL180W	1.33933	2.31562	1.28442
YPL133C	1.33876	0.937111	0.763605
YEL036C	1.33691	1.57347	0.907053
YMR291W	1.33673	2.61124	1.83698
YJL207C	1.33344	1.58266	0.779814
YMR135C	1.33215	3.29618	2.33085
YDR011W	1.32979	3.2881	2.54134
YBR021W	1.32274	2.39631	1.58616
YOR182C	1.32138	2.97009	2.21697
YBL039C	1.31903	2.86993	2.68264
YNL241C	1.31726	3.03918	1.89904
YJL026W	1.31705	2.71876	1.85783
YGL167C	1.31543	2.36334	1.87794
YPL190C	1.31364	1.87411	1.42278
YHR003C	1.30911	0.59564	1.11079
YCR011C	1.30603	2.76572	2.03346
YOR189W	1.30484	1.16793	0.874527
YLR332W	1.30393	2.58991	1.66467
YIL131C	1.3008	1.60802	2.65309
YDR156W	1.29773	2.92475	2.24097
YKL008C	1.29705	0.924237	0.715563
YLR082C	1.29368	0.628254	0.156033
YCR016W	1.29292	1.30005	0.536922
YMR296C	1.29285	3.23268	2.58614
YDR276C	1.29187	3.00246	2.14575
YLR343W	1.29054	-0.03683	-0.36664
YIL139C	1.28814	0.735243	0.704891
YMR127C	1.28729	0.601431	0.672165
YHR007C-A	1.28669	0.761116	0.665824
YKR061W	1.28283	-2.14517	0.926524
YBL099W	1.28076	3.61085	2.55697
YEL002C	1.27995	0.785186	0.480378
YLR364W	1.27874	0.62772	0.974524
YJR030C	1.27859	0.434511	0.035348
YHR080C	1.27778	1.86271	1.24638
YDR457W	1.27657	0.593857	0.730903
YDL044C	1.27437	0.750459	0.769466
YIL118W	1.27244	1.58826	1.38449
YMR058W	1.27159	0.764527	0.519594
YPL271W	1.26991	1.71392	1.59291
YGR046W	1.26952	1.03671	0.956357
YLR437C	1.26897	4.08667	2.47908
YEL009C	1.26855	2.25475	1.66365
YPR043W	1.26808	3.10559	1.99142
YPL013C	1.26783	1.27476	0.817955
YOR155C	1.26778	0.608369	0.249603
YCR017C	1.26718	1.40623	1.00678
YDR319C	1.26717	-0.09953	0.777613
YMR014W	1.26613	1.90494	1.43118
YGR021W	1.2659	1.91467	1.27724
YPL199C	1.26511	2.93222	1.97871
YOL032W	1.2637	-0.32661	0.575379
YNL130C	1.25854	1.35465	1.31308
YDR231C	1.25726	2.27017	1.71122
YNL099C	1.25503	0.680088	1.07791
YER089C	1.25118	1.17476	0.847866
YLR028C	1.25058	0.73365	1.06147
YOR346W	1.25043	1.08209	0.282719
YPL169C	1.25011	0.909584	0.634042
YDR372C	1.2498	0.855804	1.03055
YOR349W	1.24263	2.32092	1.61458
YDR361C	1.24176	0.508011	0.26874
YMR205C	1.24076	-0.32383	1.04956
YHR074W	1.24009	0.654055	0.643339
YMR106C	1.23918	1.3042	0.764371
YMR304W	1.23738	1.88434	1.2246
YLL048C	1.23497	0.953097	0.71504
YPL141C	1.23485	2.07833	1.22178
YLR449W	1.23428	0.541649	0.350293
YKL179C	1.23301	1.03077	0.779768
YDR399W	1.23145	2.19038	1.37857
YLR345W	1.23136	1.14062	0.785878
YML055W	1.23124	0.97147	0.752644
YDR425W	1.22951	0.728975	0.788748
YPR193C	1.22528	0.568939	0.5086
YKL103C	1.22479	1.79726	1.43118
YOL089C	1.22462	0.225266	0.701158
YGL190C	1.2233	-0.57466	0.851373
YLR297W	1.22049	2.7929	1.95563
YNL050C	1.21859	-1.55097	0.252054
YHR012W	1.2185	0.854104	0.845445
YKL086W	1.21766	2.09404	1.69676
YKL182W	1.2173	2.7475	2.13894
YGR253C	1.21696	1.28837	1.06938
YHR013C	1.21645	1.74949	1.05864
YPR072W	1.21594	1.18458	0.438195
YBR123C	1.21237	1.57955	1.60504
YNL190W	1.21106	2.24197	1.96488
YHR052W	1.21095	0.828634	0.929179
YNL162W-A	1.20994	0.752223	0.437308
YER113C	1.20441	1.38155	0.927233
YLR356W	1.20111	1.35243	0.829082
YDR006C	1.19744	3.09313	2.06652
YOL129W	1.19578	-0.1801	0.584273
YOR230W	1.19474	0.465881	0.873839
YNL118C	1.1929	3.62851	2.824
YLR342W	1.19163	1.99538	0.843617
YHR143W	1.1888	1.99031	1.36573
YDL236W	1.18854	0.978122	0.617565
YGL086W	1.18671	1.21523	0.706223
YPL081W	1.18548	2.13705	1.40226
YPL135W	1.17406	3.63887	2.85622
YNL144C	1.17352	2.96636	2.22496
YDR263C	1.17145	0.228588	0.276601
YMR227C	1.17057	0.982442	0.785758
YNL209W	1.16836	1.08871	1.64641
YNL075W	1.16661	1.56343	0.939094
YGL101W	1.16576	1.33346	0.73683
YDL224C	1.16072	1.68068	1.27114
YPL232W	1.15811	1.82226	1.25809
YLR113W	1.1574	1.64499	1.44627
YDL198C	1.15719	2.30771	1.51853
YDR100W	1.14924	1.90708	1.50019
YGR056W	1.14851	1.44533	1.01897
YOL020W	1.14738	1.16403	0.691167
YIL114C	1.14477	1.04245	0.618006
YOR367W	1.14249	1.04142	0.841133
YOR124C	1.14131	0.791256	0.98454
YBR119W	1.13933	0.722611	0.012745
YOR293C-A	1.13884	1.36144	0.829509
YLR446W	1.13559	0.924315	0.459496
YIL124W	1.13532	0.84303	0.709441
YDR185C	1.13511	1.5839	0.982537
YNL232W	1.13371	1.39094	0.878296
YHR079C	1.13351	1.17109	1.02742
YDR254W	1.13308	1.53951	1.6338
YDL169C	1.13256	1.36151	0.637043
YOL056W	1.13221	0.360923	0.684475
YIR018C-A	1.12906	2.79206	2.03741
YDR257C	1.12793	0.462439	0.422169
YOR010C	1.12716	2.18648	1.51915
YJL134W	1.12701	0.92991	0.609184
YNR066C	1.12696	0.836606	0.931215
YDR059C	1.12625	1.28079	0.592348
YDR335W	1.12564	1.50567	0.747119
YGL176C	1.12494	0.444765	0.0684
YDR323C	1.12312	1.0625	0.542505
YJR122W	1.12285	1.03507	0.637124
YBR189W	1.12259	2.87034	1.80404
YGR225W	1.12248	0.815917	1.12895
YIL055C	1.11757	3.02091	2.18223
YLR032W	1.11512	1.22835	0.813856
YEL034W	1.11238	2.8133	1.88293
YMR125W	1.10819	0.489828	0.698054
YHR064C	1.10791	1.91983	1.50371
YKL068W	1.10587	1.69579	1.03083
YJR125C	1.10166	0.88867	0.717296
YLR453C	1.10135	0.709207	0.658276
YER069W	1.09995	2.31832	1.66478
YPL106C	1.09966	0.00465	1.09343
YML052W	1.09837	1.98598	1.48832
YOR356W	1.09522	0.783393	0.52489
YDR003W	1.09394	1.37984	0.935423
YDR299W	1.09387	1.935	1.61885
YKL186C	1.09219	2.7136	1.91885
YCR037C	1.09129	0.479356	0.473684
YOR071C	1.09119	2.05309	1.51503
YGL066W	1.09085	1.28458	0.896778
YER074W-A	1.09075	1.22973	0.829561
YDR520C	1.0903	0.631166	0.713899
YDL072C	1.08946	1.93806	1.45248
YER110C	1.08879	0.925716	0.670218
YOR319W	1.0886	2.30558	1.64768
YJR127C	1.08343	2.7235	2.00324
YDR434W	1.08318	-1.02435	0.745385
YKL148C	1.08129	1.60314	0.992407
YPR163C	1.08071	1.77302	1.14222
YJL131C	1.07827	0.83948	0.340917
YJL051W	1.0777	0.962588	0.524916
YGR121W-A	1.07667	1.43772	1.07821
YDL061C	1.07653	3.76196	2.70481
YDL139C	1.07471	1.15929	0.587876
YER049W	1.07364	1.65207	1.16035
YLR063W	1.07259	0.788293	0.603
YJL130C	1.07075	2.04678	1.664
YER013W	1.06665	1.7666	1.30636
YDL125C	1.06505	1.99566	1.51298
YOL124C	1.06419	0.968665	0.724935
YPL241C	1.0631	1.3261	0.970927
YKL077W	1.06238	0.553324	0.53882
YNL292W	1.06077	-0.24804	0.455776
YIR017C	1.05897	2.3729	1.56918
YHR006W	1.05655	1.11025	0.908342
YHR155W	1.05397	1.28336	0.841139
YLR168C	1.05265	1.61226	1.12634
YGL242C	1.05206	0.348437	0.681011
YDR482C	1.05142	1.57471	1.23407
YOR151C	1.04808	1.72975	1.46764
YLR397C	1.04749	0.778121	0.270266
YMR065W	1.04549	1.03923	1.02232
YFL021W	1.04404	3.53731	2.71776
YBL044W	1.04377	3.21313	2.37176
YIL122W	1.0417	2.37412	1.57464
YJR110W	1.03848	1.84505	2.30925
YLR002C	1.03832	1.32929	0.840368
YMR076C	1.03796	2.14034	0.792528
YER045C	1.03782	-1.7684	0.436157
YDR239C	1.03736	0.734339	0.635355
YHR151C	1.03507	3.41136	2.78654
YNL231C	1.035	3.22098	2.40813
YFR034C	1.03492	2.43657	1.9309
YKL032C	1.03147	2.64299	2.00542
YLR277C	1.02738	0.66122	0.182915
YGR178C	1.02717	1.71279	0.91884
YOR044W	1.02623	1.48383	0.820011
YOR382W	1.02157	1.54305	1.088
YPL263C	1.01925	1.07384	0.960031
YGR204W	1.01917	3.09906	2.40345
YPL088W	1.01808	1.81131	1.32053
YMR183C	1.01794	2.54748	1.8576
YER017C	1.01368	2.4528	2.13264
YGR241C	1.01316	3.31687	2.48392
YKL119C	1.01289	0.775816	0.867058
YGR086C	1.01251	2.86048	1.84232
YBR202W	1.01136	1.98901	1.19724
YKL203C	1.00998	0.533872	0.55912
YER062C	1.00813	2.6602	2.03378
YGL081W	1.00803	0.893276	0.681084
YLR249W	1.00758	1.65771	1.30524
YGR023W	1.00738	1.15217	0.787706
YOR285W	1.00582	1.31369	0.910721
YBR059C	1.00501	2.58884	1.90192
YLR396C	1.00455	-0.83549	0.528636
YGR094W	1.00383	1.66802	1.12523
YJL080C	1.00317	1.85966	1.29841
YMR044W	1.00099	0.332274	0.873272
YLR055C	0.999978	3.40315	2.55833
YBR102C	0.999442	1.05428	0.635591
YDR169C	0.999243	1.25353	0.886703
YOR249C	0.998994	0.575375	0.677041
YPR122W	0.99884	1.70249	1.33461
YOR174W	0.995955	0.903502	0.648671
YNL230C	0.995272	1.12336	0.987433
YPR079W	0.994498	0.967396	0.67532
YDR452W	0.993577	3.00079	2.1993
YDL019C	0.990888	1.65145	0.915916
YLR298C	0.989679	0.827833	0.415008
YHR172W	0.9887	1.09542	0.475923
YER052C	0.987316	1.72849	1.39986
YMR055C	0.986562	1.31815	0.741194
YDL199C	0.985499	1.3325	0.83238
YGR155W	0.982507	1.95524	1.59103
YJL170C	0.982058	1.01185	0.612708
YKL068W-A	0.981372	2.71617	1.87475
YDL122W	0.980072	0.497008	1.04498
YGR220C	0.979896	0.915685	0.268853
YPR029C	0.979062	1.05363	0.258617
YML018C	0.978992	2.12426	1.57444
YDR041W	0.978414	1.2374	0.83975
YDR294C	0.976028	0.97091	0.7453
YOR116C	0.975844	1.42089	1.11865
YBR082C	0.972985	2.62945	2.24828
YFL040W	0.966962	-0.13093	0.480609
YBL087C	0.96547	3.08029	2.01912
YDR022C	0.96471	2.05439	1.25827
YIL051C	0.962607	1.69665	1.54823
YML035C	0.962413	2.08697	1.35598
YGR031C-A	0.962064	2.91663	2.1861
YPL179W	0.961895	1.69046	1.39783
YJL203W	0.961771	0.540871	0.449265
YHR071W	0.96159	3.13702	2.52858
YER172C	0.961276	-0.2836	0.492715
YLR179C	0.960949	3.30587	2.23694
YOR340C	0.960491	1.72843	1.20364
YDR234W	0.960078	3.82776	3.02126
YOR355W	0.958294	-2.99086	0.667817
YHL001W	0.958123	3.04383	2.0325
YDR437W	0.956652	1.2593	1.40146
YFL007W	0.955678	1.39931	0.52252
YKL059C	0.953508	0.607166	1.27844
YOR171C	0.948554	1.48919	0.956946
YPL259C	0.94747	1.2471	1.91558
YPL020C	0.946302	1.03396	0.973241
YLR420W	0.942108	1.66754	1.06756
YPR135W	0.941769	1.14014	1.1822
YPL273W	0.939402	1.78649	1.0403
YBR037C	0.937757	0.730524	2.36969
YBR005W	0.937712	1.15457	0.842215
YER166W	0.935543	0.803667	0.500876
YFR039C	0.934363	0.738605	2.37746
YDR086C	0.934291	1.99871	1.19158
YNR013C	0.932816	2.35159	1.49839
YOR164C	0.932164	1.2967	1.00614
YNL147W	0.931056	1.82032	1.3103
YCR012W	0.930751	-0.34187	0.726363
YMR019W	0.92936	1.1162	0.665152
YDR494W	0.929049	1.05682	1.06454
YLR299W	0.928692	1.57565	1.06147
YJR007W	0.923954	1.92089	1.22498
YBR045C	0.922262	0.336608	0.621262
YGR095C	0.920244	0.649141	0.673571
YNL103W	0.919031	2.20114	1.73671
YBR053C	0.918454	1.46873	1.13325
YPR091C	0.915004	0.908749	0.740573
YCL025C	0.913803	1.07891	0.972674
YNL299W	0.913745	1.26277	0.372176
YGL248W	0.91121	1.22914	1.09576
YLR015W	0.910303	0.327395	0.716331
YJR154W	0.909962	1.43257	0.938709
YBL011W	0.908803	2.67868	1.74802
YJL106W	0.90851	2.00145	1.29999
YIL064W	0.905979	1.13167	0.728501
YJL004C	0.902797	1.25452	1.18847
YKL116C	0.902051	1.06561	0.661251
YLR407W	0.901516	1.46409	0.892464
YMR262W	0.898212	1.39818	1.25831
YGL244W	0.896885	1.38791	1.07384
YOL121C	0.894491	3.27402	2.05158
YGR097W	0.892764	1.19848	0.830357
YBR098W	0.891373	0.355124	0.189888
YPL043W	0.889158	0.585181	0.83313
YGR229C	0.888052	2.4114	1.52107
YEL013W	0.886144	1.2358	1.23395
YMR010W	0.886079	1.2202	1.2371
YHR179W	0.884948	2.31312	1.77012
YNL031C	0.884714	1.00221	0.915709
YHR162W	0.883858	1.49566	0.844337
YPL225W	0.883288	0.712396	0.480894
YDR092W	0.882495	1.50622	0.883512
YNL015W	0.88242	1.59536	1.03638
YDR027C	0.879179	0.698069	0.197731
YGL029W	0.877851	1.22214	0.580017
YJL076W	0.876966	1.66564	1.33383
YDL036C	0.876866	0.991832	0.437936
YOR279C	0.875973	0.736111	1.22014
YOL130W	0.874547	1.45884	0.992596
YLR165C	0.873752	0.10047	0.220391
YKL072W	0.872139	0.925552	0.974586
YBR208C	0.871787	2.54072	1.43948
YDR130C	0.868886	0.995723	0.610487
YNR048W	0.867445	0.457277	0.664887
YNR001C	0.867416	2.94914	1.98951
YLR312C	0.867152	3.42036	2.57404
YOR360C	0.867059	1.57006	1.23214
YDR318W	0.865227	1.34416	1.33883
YPL042C	0.864026	0.832584	1.08549
YJR070C	0.862496	0.861657	0.790344
YPL123C	0.859682	1.15686	0.703496
YJL115W	0.859585	1.45089	0.920043
YOR062C	0.857461	2.55558	1.67184
YHR122W	0.857431	0.563116	1.07853
YPR124W	0.855181	0.484369	0.190125
YKL035W	0.854437	1.84838	1.31961
YKR028W	0.853876	1.00698	0.671708
YJL025W	0.851551	-0.06195	0.617731
YCR036W	0.851146	1.38388	1.09331
YNL119W	0.850884	0.261186	0.800637
YOR128C	0.847523	0.454744	0.413626
YOR311C	0.847218	0.882321	0.406223
YHL029C	0.847007	2.2811	1.66531
YOR147W	0.843489	2.15988	3.04595
YGL134W	0.843072	1.22828	0.564823
YDR493W	0.842866	-0.24342	0.7404
YOR233W	0.842392	0.158363	0.58395
YER077C	0.839924	0.190907	0.66974
YNL127W	0.839504	-0.00918	1.13537
YHR110W	0.838683	1.34525	0.942861
YJL125C	0.837997	-0.09898	0.728374
YGR281W	0.836955	2.75189	2.05813
YGR240C-A	0.836832	2.1083	1.81144
YOR266W	0.835952	0.53705	0.557579
YOR058C	0.835514	-1.12419	0.960731
YPL231W	0.835236	2.43169	2.0358
YGR038W	0.835053	1.40909	0.985436
YDR227W	0.833619	0.580129	0.939991
YGR009C	0.833536	1.04313	0.709121
YHR046C	0.830869	1.66237	1.14116
YOR160W	0.83046	0.516772	0.798739
YER007C-A	0.829614	-0.15189	0.677782
YGL044C	0.828934	1.2715	0.646441
YOR109W	0.826651	1.23771	0.904103
YEL003W	0.826048	1.30461	0.768608
YBR049C	0.824875	2.6221	1.93026
YDL186W	0.824457	1.0635	0.160384
YNL132W	0.823488	1.39515	0.355759
YDL105W	0.8232	1.09524	1.14007
YPL075W	0.821191	2.1741	1.46405
YBL107C	0.820356	1.21447	0.862659
YKL110C	0.820278	1.00628	1.03886
YOR161C-C	0.820264	1.44888	1.17875
YLR253W	0.819179	0.684452	0.537278
YLR135W	0.818496	-0.01242	0.709653
YER075C	0.818455	2.41904	1.67765
YPR143W	0.816836	0.253507	0.94993
YPL085W	0.815329	0.916102	0.612277
YGR233C	0.814916	1.45522	1.19635
YOR008C	0.814741	2.00452	1.33211
YLL007C	0.814736	0.562326	0.25668
YNL076W	0.814483	1.14299	0.528763
YOR316C-A	0.814445	0.585764	0.934649
YDR386W	0.812469	0.081188	0.160185
YGL184C	0.812464	2.22246	1.58093
YLR360W	0.811072	-1.08314	0.777418
YDR124W	0.810565	2.35491	1.68556
YLR023C	0.810474	3.52049	2.50092
YGR089W	0.810301	0.61143	0.824078
YNL233W	0.808411	1.55587	1.03447
YIL021W	0.807759	1.47027	0.736927
YKL042W	0.807151	2.22401	1.38261
YLR172C	0.804229	0.704289	0.247587
YJL012C	0.803352	1.84939	1.38426
YDL149W	0.80281	0.369867	0.310113
YPL065W	0.801754	1.41637	0.889783
YJR113C	0.801695	1.77725	1.58385
YNL305C	0.801393	1.63574	0.781862
YNL301C	0.800428	1.36094	0.948986
YLR099C	0.800353	0.932464	1.01977
YMR126C	0.800188	1.13545	0.751309
YKL181W	0.800141	1.01688	0.164917
YJL045W	0.79988	1.09522	0.381745
YDL216C	0.799814	1.18779	0.476052
YDL215C	0.79855	2.8184	2.33898
YFL008W	0.796806	0.768816	0.76518
YKL130C	0.796773	0.949455	0.825136
YOR363C	0.796714	1.34608	1.34641
YOR287C	0.792191	1.16532	0.410407
YER130C	0.792154	2.27809	1.61415
YDR261C	0.791662	2.03082	1.24705
YER154W	0.791612	1.39392	1.04947
YHR114W	0.790921	0.144341	0.521586
YIL076W	0.790268	1.09699	0.783986
YMR307W	0.789589	1.80186	1.21561
YBR054W	0.789542	2.35151	1.51173
YHR170W	0.789485	1.54991	1.0886
YJR016C	0.788631	1.82146	1.55608
YML121W	0.787793	1.44525	1.21372
YER048W-A	0.787755	1.23337	1.13731
YNL175C	0.786799	1.65017	1.02513
YDL005C	0.786492	0.669334	0.61032
YNL126W	0.785158	0.916483	0.504833
YKL113C	0.783568	1.4882	1.11165
YDL138W	0.782444	1.78436	1.27127
YOR028C	0.780778	3.10902	2.07729
YMR003W	0.779319	2.11342	1.27575
YER056C	0.77914	2.10836	2.25775
YMR256C	0.778312	2.05063	1.18398
YNL004W	0.777576	1.29707	1.22174
YDR085C	0.777539	1.18665	0.662641
YLR447C	0.776128	1.61819	1.08278
YPL144W	0.77541	1.62723	1.22084
YGR206W	0.774848	-0.09677	0.465924
YBR196C-A	0.77464	1.53727	1.3728
YMR271C	0.77463	2.70513	1.52767
YLR395C	0.773442	1.87342	1.27229
YGR196C	0.770128	0.959105	0.815175
YJL023C	0.768787	0.547684	0.489474
YNL192W	0.767942	2.96774	2.09842
YJR103W	0.767447	0.944583	1.677
YBR195C	0.766019	0.623637	0.451445
YDR005C	0.764954	1.8517	0.893555
YJL148W	0.764556	2.4884	1.72549
YLR029C	0.763344	2.07746	1.73425
YER114C	0.762678	1.95791	0.891832
YFL016C	0.76252	3.04517	2.1899
YCR009C	0.762225	1.47487	0.999608
YGR163W	0.761053	0.900869	0.616637
YOL021C	0.759291	1.9314	2.28955
YMR243C	0.758842	2.80347	1.75205
YPL117C	0.756246	0.056666	1.67077
YOR152C	0.754657	0.059096	0.309059
YOR144C	0.754484	0.722332	0.484889
YGR108W	0.753919	1.06655	0.561884
YLR163C	0.753574	1.04731	0.770809
YLR306W	0.751729	1.37022	0.67649
YBR140C	0.751698	1.08709	0.709161
YMR031C	0.750784	3.13828	2.01158
YJR094W-A	0.750758	2.83672	1.87596
YGR267C	0.74919	1.44331	1.04525
YLL018C	0.748605	0.84021	0.190529
YER006W	0.747777	1.62283	1.04902
YBR070C	0.74766	1.68144	1.2222
YMR169C	0.745865	0.614048	0.778035
YNL030W	0.744334	1.27975	1.56111
YDR090C	0.744147	1.40169	0.827255
YGL038C	0.74333	2.37776	1.70949
YGR145W	0.743213	-0.0544	0.580586
YDL160C-A	0.742087	0.152996	0.910559
YPL267W	0.741157	1.15346	0.824984
YJL006C	0.740606	1.68054	0.832398
YOR272W	0.740245	2.32368	1.68601
YPL202C	0.738783	2.42929	1.83025
YMR172W	0.738414	3.78665	2.83785
YDL001W	0.738221	1.9161	1.35137
YOL123W	0.737221	2.60602	1.35201
YGR191W	0.73675	1.52389	0.8379
YNL087W	0.736617	2.22197	1.30912
YEL063C	0.735558	3.29385	2.37289
YDR266C	0.735536	0.932273	0.569922
YDL006W	0.735362	1.06507	0.834029
YOL110W	0.735186	1.86281	1.24537
YPR125W	0.734517	2.18593	1.72015
YGR192C	0.733609	-0.39367	0.645243
YNL006W	0.733056	2.66607	2.12818
YKR069W	0.732989	1.53013	1.46121
YGL061C	0.732743	0.618621	0.544826
YBR187W	0.732213	2.46743	1.8093
YLR287C	0.731121	0.854318	0.202296
YDL181W	0.730665	3.3398	2.60209
YLR353W	0.729753	2.28223	1.5258
YPL034W	0.729314	1.00611	1.34556
YBR145W	0.72671	1.48451	1.12284
YDL132W	0.726162	0.967396	0.567143
YNR012W	0.725213	0.472401	0.441069
YFL056C	0.723683	0.749865	0.309093
YER092W	0.723012	2.71077	1.94634
YDL134C	0.722776	1.62026	0.949643
YIL074C	0.722316	1.88951	1.45122
YPR102C	0.720797	3.62273	2.91619
YNL236W	0.718111	0.869057	0.543295
YDR368W	0.716596	0.815213	0.821865
YLR036C	0.715206	1.3749	0.793382
YPL181W	0.714147	1.74751	1.07969
YDR063W	0.712316	0.335852	0.460586
YBL023C	0.711131	-0.724	0.412778
YKR042W	0.710898	3.12158	1.84213
YKL201C	0.710606	2.87707	2.03608
YDR062W	0.710381	1.86364	1.46339
YPL236C	0.710196	1.36782	1.08785
YML056C	0.709301	1.56529	0.871376
YPL180W	0.707593	1.30897	1.17368
YDR309C	0.705485	2.64508	1.64035
YBL014C	0.705361	1.39826	0.954864
YIL045W	0.704454	1.36581	1.31818
YNR028W	0.704328	1.91229	1.24367
YER028C	0.702774	2.22224	1.25559
YLR399C	0.702733	3.08467	2.1494
YDR461W	0.702579	1.0856	1.31677
YKL006C-A	0.701961	1.40387	1.08151
YFL013C	0.701261	1.10205	0.839723
YLR398C	0.701225	0.23349	0.00434
YBL054W	0.700828	1.58386	0.846027
YLR043C	0.700712	0.992033	0.363512
YKL145W	0.700575	1.14082	0.716542
YML131W	0.700505	1.08496	0.683387
YLL043W	0.698733	1.98493	1.2028
YMR152W	0.697941	0.73104	0.874909
YJR003C	0.697276	1.46659	1.07054
YOL066C	0.696856	-2.57754	0.482074
YKL172W	0.696786	0.571039	0.332486
YPR021C	0.695792	0.775619	0.458734
YDR517W	0.695698	1.87384	1.07927
YDR297W	0.692564	3.32234	2.33816
YGR158C	0.690836	0.885057	0.662712
YMR246W	0.690209	1.16783	0.956614
YJR054W	0.690065	1.345	0.635494
YGL207W	0.689595	1.73574	1.1842
YPR051W	0.689308	1.11965	0.530471
YDL229W	0.688569	1.98197	1.50343
YMR272W-B	0.687051	3.16647	1.99382
YOR186W	0.684647	1.80375	1.24889
YJL151C	0.684317	2.76376	2.13158
YPR008W	0.682223	2.39454	1.27888
YLR367W	0.682111	2.17828	2.04092
YLR408C	0.682102	0.633367	0.172521
YDR349C	0.681942	1.87284	1.18035
YEL044W	0.681791	2.80179	1.83963
YOR276W	0.681787	1.49139	1.12466
YKL053C-A	0.681464	1.15108	0.794847
YBL026W	0.681339	1.22441	0.729039
YMR053C	0.680758	1.32266	0.921465
YLR166C	0.680707	0.024067	0.266206
YPR031W	0.680327	1.42217	0.993797
YKR095W	0.679868	1.90709	1.18604
YPL071C	0.678612	1.08956	0.763921
YHR147C	0.676604	1.46625	0.70452
YOR354C	0.676322	1.65252	1.20755
YGL071W	0.673676	2.9388	2.34251
YJR063W	0.671451	1.51131	2.38924
YLR108C	0.670045	2.28224	1.43748
YOR106W	0.669155	1.00672	0.650664
YIL102C-A	0.668973	1.75715	1.30409
YNL172W	0.668516	2.3854	1.75383
YDR298C	0.667373	1.61953	1.02531
YBR046C	0.666657	1.39257	0.969637
YPL148C	0.666393	1.01568	0.963873
YKL127W	0.664773	1.29074	0.868644
YGR047C	0.664511	2.62748	1.96117
YOR092W	0.662695	2.82304	2.05947
YPL138C	0.662365	0.674836	0.247687
YLR083C	0.661722	1.18801	0.768719
YGR061C	0.661384	0.961372	0.689355
YEL064C	0.660393	0.864294	0.595816
YPR159W	0.659192	3.68453	2.63214
YPL118W	0.658443	0.285896	0.543012
YER122C	0.657942	1.26543	1.16799
YHR001W-A	0.655082	1.15026	0.808542
YOR001W	0.654173	-0.80571	-0.67868
YLR272C	0.653893	0.518898	0.684476
YDL170W	0.653121	2.69789	2.14043
YJL164C	0.65071	1.60339	1.05764
YBR147W	0.650406	0.859467	0.777564
YHR131C	0.650168	0.847315	0.908702
YDR363W-A	0.649554	1.83393	1.29452
YLR380W	0.646139	0.760525	0.76418
YEL018W	0.645242	0.947027	0.405911
YDR364C	0.644119	-0.71255	0.044894
YOR372C	0.644097	1.88363	1.20416
YHR150W	0.642571	3.40459	2.38413
YOL115W	0.640409	0.805242	0.696514
YDL054C	0.639292	1.54239	1.3312
YOR236W	0.637097	1.26962	0.723759
YCR106W	0.636638	0.750208	0.478169
YOL023W	0.636563	0.088138	0.416813
YDR280W	0.635502	1.04092	0.813258
YNL041C	0.635463	1.05204	0.915045
YLR212C	0.635357	0.94333	1.09048
YLR205C	0.632663	1.39754	0.757684
YDR210W	0.631678	1.40445	1.13326
YHL032C	0.631179	0.955117	0.450321
YLR307C-A	0.631082	1.36713	0.883717
YOR117W	0.628846	1.31561	1.10226
YMR075W	0.627607	1.74784	1.42638
YGL253W	0.627456	2.98971	2.22483
YGR215W	0.627287	0.419898	0.735056
YBR282W	0.625917	1.29486	0.891291
YDR069C	0.623432	0.294758	1.16167
YKR102W	0.623256	1.19082	1.03348
YGL203C	0.620527	1.33026	0.733298
YDL128W	0.620392	1.90718	1.40634
YKL183W	0.619485	0.85953	0.802624
YOR226C	0.619303	1.367	1.03806
YDL178W	0.618974	0.74592	1.14612
YLR049C	0.618227	1.44244	1.15163
YJL088W	0.617221	3.41602	2.3759
YOR063W	0.616754	1.61341	1.07854
YOR181W	0.61515	0.968375	0.566116
YGL230C	0.613604	-1.04016	0.808286
YBL031W	0.613551	1.06553	0.316197
YGL219C	0.613114	1.94785	2.38993
YML086C	0.612157	0.937805	0.625766
YKR059W	0.611342	2.15644	1.82615
YER008C	0.610843	0.901516	0.435499
YOR119C	0.609559	2.71326	2.01469
YDR314C	0.609506	0.640059	0.520312
YDR013W	0.6095	0.907288	0.638319
YLL062C	0.609316	0.769408	0.353372
YER063W	0.608438	1.56722	1.14783
YNL217W	0.608363	1.63453	1.03855
YIL161W	0.607914	0.510459	0.281577
YHR094C	0.607326	2.23947	1.39284
YER159C	0.606389	2.41526	1.66186
YOR220W	0.60539	1.64106	1.17018
YER146W	0.605291	2.12744	1.56126
YJL090C	0.602463	-0.06889	0.547303
YKL142W	0.602128	2.10134	1.43586
YBL098W	0.599965	1.05533	0.47005
YMR100W	0.599484	1.68941	1.46596
YIL158W	0.596326	1.90583	1.23296
YLR429W	0.595967	-0.01049	0.426
YHR096C	0.595721	3.22342	2.39305
YHR084W	0.594988	1.60978	1.19683
YJR088C	0.594553	1.0354	1.13884
YPR133W-A	0.592907	1.83149	1.17292
YOR265W	0.592388	1.10587	0.830057
YGL058W	0.592061	1.94749	1.33192
YNL110C	0.591542	1.76866	1.17763
YCR101C	0.590503	0.178425	0.304189
YML111W	0.590464	1.60129	1.14058
YGL059W	0.590434	1.11506	0.68866
YER095W	0.589325	1.3769	0.85739
YLR193C	0.58905	1.68942	1.02015
YKL058W	0.588492	1.38864	0.848373
YNL304W	0.588294	1.73155	1.17425
YPL032C	0.588262	3.18552	2.40457
YOR004W	0.58735	1.47673	0.822614
YOL151W	0.58521	1.63261	1.49553
YIL145C	0.584845	0.593519	0.208584
YJL094C	0.584312	0.619766	0.53188
YPL172C	0.583632	1.81692	1.60184
YGR195W	0.583412	2.14123	1.60332
YGL195W	0.583158	1.2928	0.78893
YJL201W	0.58085	1.66171	1.26657
YFL010C	0.580424	1.56611	0.906691
YOL013C	0.57995	1.45402	0.804131
YLR151C	0.579315	0.651957	0.586402
YHR028C	0.578329	1.22916	1.22108
YGR209C	0.578317	1.06224	0.798433
YNL202W	0.577662	0.994156	0.49622
YDR122W	0.577343	1.58153	1.07669
YKL126W	0.577062	1.55762	1.1462
YDR357C	0.576881	1.80736	2.11771
YDR334W	0.57662	1.88042	1.09633
YGL027C	0.575485	0.624432	0.396107
YLR090W	0.574439	0.657976	0.665286
YDR184C	0.574112	0.239038	0.870772
YPL052W	0.572829	1.21683	1.26231
YGR162W	0.572737	2.379	1.51045
YDR481C	0.572514	0.867778	1.05651
YPL233W	0.57215	1.87105	1.39576
YDR052C	0.571236	1.30094	1.51654
YGL171W	0.570571	0.95685	0.324901
YOR064C	0.569927	3.59537	2.56628
YPR057W	0.56877	0.792374	0.533913
YKL167C	0.56782	1.13207	0.986671
YEL051W	0.565311	1.11739	0.759406
YPL173W	0.564391	0.700336	0.550691
YDL217C	0.560928	0.680301	0.278518
YOR241W	0.559758	0.407938	0.622845
YLR103C	0.557931	1.06909	1.02458
YGR110W	0.557657	1.6911	0.99876
YER068W	0.557304	1.90615	1.3836
YDL063C	0.555821	0.031413	0.368517
YMR290C	0.554799	1.79027	1.39436
YOR304W	0.55318	1.08549	0.884944
YPL266W	0.553006	0.594141	0.883943
YDR415C	0.55094	1.0879	1.30803
YGR205W	0.550231	1.24619	0.712457
YLR352W	0.54814	0.972202	0.726482
YDR224C	0.54697	2.53822	2.20247
YHR075C	0.546463	0.871199	0.730108
YMR260C	0.545284	0.036742	0.966675
YGL186C	0.545045	0.900383	0.76761
YOR227W	0.544585	1.58645	1.32558
YLR273C	0.544116	1.3342	0.684474
YOR317W	0.543812	2.35982	1.90076
YPL019C	0.541454	1.02966	1.18418
YDL130W-A	0.540905	1.71121	1.27673
YER059W	0.540131	1.83884	1.41213
YML091C	0.539502	3.22701	2.43627
YKL052C	0.538114	2.58785	2.03459
YDR172W	0.538047	0.812317	0.40853
YMR204C	0.537757	-1.18297	0.082632
YDR322W	0.537112	1.03602	0.929231
YLL009C	0.536198	0.984398	0.899063
YBR085C-A	0.535676	1.89396	1.43989
YNR034W	0.534592	1.70009	1.31226
YHR181W	0.534562	2.06656	1.42023
YDL029W	0.534433	0.796139	0.716131
YPR074C	0.534321	2.80488	1.99222
YDR054C	0.532584	1.70472	1.22699
YOL036W	0.53086	1.76866	1.61207
YLR326W	0.530442	1.14542	0.678817
YBR065C	0.529611	2.22644	1.51448
YFL027C	0.528192	0.722109	0.898375
YOL004W	0.527994	2.00082	1.21392
YLR301W	0.526809	2.27843	1.53512
YER158C	0.526532	3.0402	2.13534
YOR042W	0.525019	1.43518	1.29438
YBR255C-A	0.524933	1.32127	0.995416
YDL173W	0.524738	0.860512	0.697553
YBR149W	0.524259	1.1144	1.03635
YGR271W	0.524214	-0.91399	0.506536
YGL158W	0.524188	2.20783	1.05787
YKL184W	0.524176	2.64474	1.56454
YHL003C	0.521017	1.6862	1.23212
YPL228W	0.520777	0.62601	1.12853
YPR127W	0.519031	2.67763	1.79834
YNR050C	0.518275	1.2181	0.774902
YLR116W	0.518131	0.591983	0.601863
YLR266C	0.516046	0.97549	0.745828
YBR217W	0.516033	0.566902	0.508796
YHR081W	0.515854	1.39045	0.873039
YKL054C	0.515125	2.71888	2.61734
YDR153C	0.515092	2.01545	1.4206
YMR173W	0.514654	1.96307	1.39337
YBL059C-A	0.51416	0.796784	1.01007
YPL157W	0.51401	1.51432	0.927614
YCR023C	0.513725	0.932566	0.933216
YBL018C	0.513195	0.763556	0.510264
YML127W	0.513165	1.29214	0.701653
YPL219W	0.512978	0.977011	0.443599
YNR008W	0.512693	0.659869	0.667093
YIL070C	0.512627	1.15251	0.93164
YLR130C	0.512023	1.65084	1.06947
YML058W	0.511558	3.22548	2.18862
YHR111W	0.510994	0.617062	0.44732
YJR101W	0.508678	3.20491	1.94257
YBR010W	0.50838	1.37431	1.20122
YOR267C	0.508213	0.882136	0.743563
YEL025C	0.507399	1.60525	1.10042
YOR122C	0.507088	1.62919	1.03275
YPL249C	0.506448	0.409093	0.521877
YOR091W	0.504181	1.21344	1.02243
YJR057W	0.503777	1.03879	0.94251
YBR201W	0.502465	1.66434	1.4805
YOR083W	0.502008	2.75772	1.80865
YKL112W	0.501472	1.99375	1.47718
YDR179C	0.501149	-0.08657	1.12458
YNL146W	0.500784	0.957524	1.02123
YLR307W	0.499444	0.449691	0.326685
YOR094W	0.49822	0.810727	0.457713
YMR281W	0.497311	1.35919	0.821185
YLR264C-A	0.496367	2.67946	2.17603
YJL100W	0.49627	2.15837	1.61825
YLR347C	0.495983	2.11013	2.13904
YBR009C	0.493789	1.09852	1.22327
YMR267W	0.492784	-0.79255	0.246501
YGR150C	0.492638	1.06591	0.434665
YMR255W	0.492139	1.48083	1.25955
YPL175W	0.492061	1.03062	0.733658
YDR190C	0.49164	1.65862	1.12242
YNR055C	0.490805	0.626055	0.732143
YDR394W	0.49058	1.68467	1.32567
YBL017C	0.490449	1.82641	1.22823
YER055C	0.490448	2.74896	1.98507
YDL033C	0.489241	1.35084	0.613549
YDL121C	0.489089	1.9083	1.64626
YOL158C	0.487856	1.53973	1.45476
YPL108W	0.486944	0.8807	0.525526
YMR185W	0.486645	0.474062	0.398899
YDR260C	0.486604	1.51853	1.14104
YGL194C	0.486598	0.881677	0.36659
YER098W	0.486474	2.24314	1.45039
YIL038C	0.486047	0.685347	0.750338
YHR079C-A	0.48601	0.770729	0.342156
YLR304C	0.485593	2.60856	1.59986
YOR048C	0.484863	1.08201	0.76867
YGL099W	0.484329	1.14016	1.05079
YDR129C	0.48415	2.16479	1.38175
YLR226W	0.483525	2.52021	2.77876
YPL194W	0.483281	1.28252	0.959148
YOL051W	0.479182	2.04816	1.49337
YPR041W	0.4789	1.38685	0.8433
YLL027W	0.478448	2.06835	1.49317
YLL032C	0.478133	-1.3169	0.297189
YKR095W-A	0.47785	0.990174	0.571548
YGR287C	0.477535	1.39019	0.846263
YOR030W	0.476662	1.64264	1.02355
YGR065C	0.476495	1.76809	1.21785
YIL123W	0.474943	1.35911	0.935507
YDR506C	0.474369	2.73563	1.75097
YHL013C	0.472397	1.14535	0.740226
YGL057C	0.471891	0.962827	0.730541
YDR300C	0.470731	1.52061	0.956673
YDR207C	0.469686	1.2399	0.904868
YDR045C	0.46961	1.21126	0.715791
YOR187W	0.466958	2.19102	1.74054
YKL104C	0.466513	2.18335	1.20999
YKL135C	0.466155	-0.55403	0.489492
YNL222W	0.465786	1.27902	0.930907
YNL293W	0.465341	0.790314	0.786639
YLR120C	0.462663	1.3444	0.883991
YHR135C	0.460948	1.36418	0.916027
YMR217W	0.460907	0.937299	0.192505
YGR245C	0.460613	-0.05763	0.807607
YGL117W	0.458969	1.07254	0.867721
YER021W	0.458017	0.97751	1.14498
YFL022C	0.457181	2.38861	1.70178
YIL005W	0.457101	1.53189	1.11714
YNL280C	0.456478	1.99762	1.27334
YKL056C	0.455524	0.900605	1.41489
YDR132C	0.455158	1.41343	0.991961
YOR043W	0.455094	2.19895	1.65028
YOR361C	0.453896	1.29554	0.783019
YOR023C	0.453524	2.31176	1.77573
YGR266W	0.453206	1.40519	0.602979
YJL036W	0.453124	1.43605	0.581345
YDR443C	0.452019	1.53297	0.656477
YGR068C	0.451512	0.965653	0.888482
YPL060W	0.451476	-0.84629	0.566144
YDL013W	0.45112	1.23854	0.841427
YNL199C	0.450423	1.36485	0.950401
YJL102W	0.4496	1.5028	0.717762
YOR047C	0.449392	2.29028	1.72485
YNL135C	0.449078	1.95896	1.51103
YIL144W	0.448671	0.78226	0.725241
YGL093W	0.44544	0.860988	0.72717
YHL004W	0.444405	2.11878	1.4869
YHR089C	0.444302	1.40134	1.23035
YLR114C	0.444255	1.22228	0.448809
YJL052C-A	0.443897	2.63666	1.85141
YOR137C	0.441088	1.52036	1.39778
YER151C	0.441083	1.23281	0.469599
YOL122C	0.43991	1.2752	0.972702
YGR072W	0.439893	-0.2617	0.409229
YHR082C	0.439474	1.92564	1.32172
YOL012C	0.439369	2.67691	1.94653
YGL161C	0.4384	1.1174	0.806483
YDR012W	0.437703	1.2541	1.29011
YPL122C	0.437431	0.777139	0.573084
YOR347C	0.437308	1.30431	1.03967
YBR150C	0.436431	3.3663	2.28676
YPL264C	0.436166	0.518813	0.492658
YPR116W	0.435984	0.863022	0.333805
YDR246W	0.433755	1.29759	0.757998
YGL083W	0.433479	2.22376	0.922581
YBR160W	0.432881	0.016276	0.99836
YCR028C-A	0.432767	0.729696	0.855824
YDL153C	0.432684	1.63597	1.096
YER155C	0.432092	1.57724	1.14237
YJR097W	0.431218	1.62997	1.22207
YOL096C	0.430941	-0.92096	0.619441
YBR089C-A	0.430137	2.79644	2.1859
YDR101C	0.42999	2.32467	1.43849
YOR188W	0.4299	1.65167	0.976706
YHR154W	0.429382	1.15176	0.50802
YGL095C	0.429212	1.45507	0.724159
YML065W	0.427228	1.17467	0.791875
YKL007W	0.426113	3.12532	2.16711
YJR050W	0.425829	1.03948	0.618262
YJL091C	0.425305	1.1583	0.692411
YLR073C	0.42439	1.44395	0.805106
YPL260W	0.424072	1.41773	0.91946
YDL183C	0.423202	0.969143	0.554082
YPL218W	0.423083	1.60583	1.1308
YFL039C	0.422895	2.58245	2.17904
YOR108W	0.421978	3.00492	2.12556
YKL005C	0.421688	2.03808	1.53136
YMR123W	0.42044	1.40587	1.07525
YKL074C	0.420246	1.31559	0.859005
YOR095C	0.419305	2.05965	1.498
YGR147C	0.419044	1.12689	0.71834
YPL188W	0.418987	0.837913	0.961521
YLR260W	0.418607	0.96714	0.710606
YOL101C	0.417271	2.01061	1.60845
YBL076C	0.416714	1.37702	0.428767
YGR070W	0.416625	-0.4023	0.581179
YDL010W	0.415598	2.48754	1.93957
YOR112W	0.41559	0.811818	0.818392
YJL059W	0.414679	-3.61363	1.14134
YPR112C	0.413334	1.94243	1.24053
YOL044W	0.413213	0.963343	0.736906
YNL136W	0.413027	1.16854	0.768327
YLL015W	0.412833	1.1408	0.594209
YOR264W	0.412284	1.88231	1.32446
YMR237W	0.412134	1.50455	1.25473
YLR186W	0.411188	-0.26558	0.648124
YLR227C	0.409666	1.96124	0.768792
YJR060W	0.407887	1.73597	1.01782
YJL112W	0.407709	1.33069	0.658454
YER184C	0.406579	2.07803	1.54396
YPR069C	0.405127	0.698161	0.839292
YDR379C-A	0.404933	0.860652	0.592624
YGR084C	0.402565	1.46509	0.613615
YLR222C	0.401604	1.25271	0.551078
YDR235W	0.401181	1.14204	0.626341
YBL103C	0.400783	1.99012	1.27018
YML085C	0.400663	1.53358	1.16077
YHR029C	0.399896	0.456736	0.837948
YOR034C	0.398229	2.0934	0.831754
YEL037C	0.397967	1.79148	1.4606
YKL132C	0.397825	1.76463	1.10221
YOR327C	0.396417	2.6279	1.76236
YMR218C	0.395087	0.980533	0.60418
YPR056W	0.393887	0.196269	0.367018
YCR002C	0.393703	1.05203	0.808695
YEL027W	0.392776	1.80194	1.67575
YHR160C	0.391167	0.931287	0.519378
YBL061C	0.390988	1.22191	0.524135
YGL084C	0.390872	1.41237	0.75676
YDR381W	0.39073	1.93275	0.923734
YPL050C	0.390103	1.61219	1.20515
YBR006W	0.389459	1.29471	0.683205
YEL071W	0.388065	2.13625	1.5689
YLR275W	0.386955	0.721875	0.091304
YLR220W	0.385696	3.34012	2.41275
YGL006W-A	0.384659	2.232	1.51034
YHR178W	0.382888	2.06664	1.11756
YGL082W	0.382808	1.47078	1.00719
YJL048C	0.380586	1.35236	1.18531
YBR120C	0.380573	1.3321	0.841688
YNL113W	0.380223	1.65342	1.5557
YJL127C-B	0.380205	1.24642	0.681157
YDR188W	0.379943	3.12701	2.43079
YDL101C	0.377304	-0.0559	0.399688
YBR128C	0.377088	-0.4644	1.07122
YGL141W	0.375908	0.555556	0.454516
YLR138W	0.375155	1.19425	0.929102
YDL206W	0.37438	0.768898	0.7858
YHR127W	0.374056	1.71047	0.960049
YBR056W	0.373472	3.08959	1.97872
YDR032C	0.372571	2.30679	1.47353
YLR419W	0.370779	0.473834	0.198584
YNL229C	0.370232	2.13821	1.45892
YNL161W	0.369286	2.08911	1.32246
YDR473C	0.368174	1.07248	0.827241
YBR043C	0.368083	1.94349	1.28676
YDR515W	0.367831	1.07041	0.481225
YMR318C	0.366457	1.63653	0.930116
YDR377W	0.36509	2.02214	1.27947
YML126C	0.364977	1.1975	0.59406
YNL201C	0.364295	0.90669	0.581754
YPL258C	0.363641	2.5763	1.66634
YDR528W	0.363023	2.10019	1.58334
YDR503C	0.362688	0.434572	0.577433
YAL039C	0.3615	2.43031	1.34623
YLR319C	0.361376	0.852807	0.386441
YBR177C	0.358024	2.40162	1.89139
YDL045W-A	0.357858	1.38009	0.969315
YOR052C	0.357792	1.79271	1.16646
YMR282C	0.35609	0.934058	0.334948
YFL037W	0.355801	2.66348	1.68317
YBR198C	0.354431	1.7484	1.42891
YPL215W	0.353868	1.35484	0.872981
YOR192C-C	0.353862	-3.12256	0.34071
YPR020W	0.353253	1.03672	0.506515
YJR100C	0.353197	0.872546	0.778864
YPL083C	0.353071	-0.82541	0.470011
YDR189W	0.352999	1.21002	0.66943
YJL194W	0.352336	2.44657	1.61829
YDL160C	0.352302	1.67591	1.46707
YBR007C	0.351666	0.612123	0.268519
YKL065W-A	0.351627	0.56159	0.651145
YGR156W	0.350753	1.53988	1.04586
YDL137W	0.350254	1.80814	1.35582
YBL006C	0.349694	2.62074	2.03453
YBR122C	0.349561	1.0185	0.557688
YOL006C	0.349542	1.08043	1.55895
YEL012W	0.349479	1.8901	1.33475
YNL286W	0.347458	0.01431	0.262771
YGR124W	0.346409	1.74171	1.2239
YER035W	0.346225	2.64645	1.90961
YLR022C	0.346015	-0.82869	0.79361
YKL214C	0.345941	0.07998	0.635654
YDR352W	0.345832	2.10365	1.49812
YPL207W	0.344597	1.88629	1.42048
YOR019W	0.342751	1.21954	0.206531
YMR216C	0.341251	0.901962	0.887625
YGR103W	0.339558	0.450566	0.749777
YNR059W	0.338727	0.876346	0.830194
YOL103W	0.338719	1.01614	0.7957
YLR187W	0.338636	0.843154	0.608089
YEL050C	0.33834	1.61611	1.57678
YGR278W	0.337876	0.63458	0.773567
YCR033W	0.337686	1.17553	0.542283
YLR357W	0.337278	1.80109	0.915068
YJR130C	0.336693	1.12597	1.07659
YGL077C	0.336344	0.483897	0.728113
YGR127W	0.335572	1.47143	1.22511
YDR113C	0.335117	1.8113	1.05346
YGL259W	0.332241	-0.11283	-0.2991
YHR128W	0.332144	2.26145	1.9038
YML116W	0.332082	0.805595	0.33943
YJL218W	0.331558	1.68265	0.526873
YEL038W	0.331447	1.9348	1.24164
YHR175W	0.331066	1.19507	0.727468
YPL250C	0.330487	1.16203	1.29567
YJR109C	0.329989	0.17079	0.464962
YNL139C	0.329005	1.42386	1.03728
YOR123C	0.328944	0.652701	0.62953
YKL014C	0.32691	1.07618	1.04648
YJL013C	0.326771	0.713882	0.126993
YBR171W	0.326143	0.940646	-0.02066
YBR153W	0.325828	0.812355	0.720897
YHR086W	0.325055	0.83712	0.384834
YOR307C	0.32499	0.836814	0.731404
YGL116W	0.323333	2.14391	1.38881
YGR200C	0.322354	1.04442	0.851137
YNL180C	0.320917	1.10356	0.93013
YPR034W	0.320719	1.69752	1.1979
YJL079C	0.320631	1.162	0.824304
YMR097C	0.320475	0.525155	0.262819
YGL120C	0.318853	1.57235	0.994661
YOL139C	0.318442	0.902393	1.4529
YGR210C	0.318113	3.02827	2.28689
YBL034C	0.317945	1.60328	0.925122
YLR121C	0.316436	1.4387	0.805089
YBL085W	0.316029	1.29286	0.570942
YDR292C	0.315646	0.672063	0.664653
YPL254W	0.315573	0.979881	0.24445
YPL155C	0.315257	1.79518	1.00696
YIL008W	0.314817	1.39995	1.33719
YGL110C	0.314678	0.931002	0.992613
YDR464W	0.311158	-2.68542	0.72029
YDL177C	0.30995	0.769319	0.543162
YJR086W	0.309628	1.35833	0.946861
YIL101C	0.309272	1.98445	1.52787
YOL087C	0.308965	1.26441	0.759439
YER143W	0.308885	1.05546	0.822061
YDR308C	0.308106	0.171315	0.362209
YJR117W	0.307475	1.04876	0.994803
YCR097W	0.307231	-2.39566	-0.32363
YKR011C	0.307148	1.32276	0.892587
YMR162C	0.306752	0.90811	0.393755
YJR008W	0.306402	0.964049	0.438784
YFL017W-A	0.30628	1.61139	1.33061
YER048C	0.305544	1.84957	1.22201
YPR003C	0.305438	1.27609	0.926197
YLR310C	0.305312	0.866519	0.430646
YNR019W	0.305228	2.0284	1.36352
YFL004W	0.3043	0.80233	0.671015
YJR153W	0.303166	-0.64562	0.063436
YDL241W	0.302734	1.18318	0.813823
YPR196W	0.302454	1.0046	0.771202
YDR281C	0.301506	1.27163	0.822436
YPR009W	0.301484	0.71367	0.578418
YHR005C-A	0.301112	2.50917	1.46836
YNL079C	0.300689	2.54294	2.04258
YLL013C	0.300355	1.69702	1.51857
YKR035W-A	0.300158	0.816951	0.172944
YDR538W	0.299968	1.40911	1.12873
YPL149W	0.299059	1.31475	0.95642
YGR198W	0.298855	1.88601	1.46537
YLL004W	0.298525	0.36061	0.176347
YML043C	0.297049	0.559984	1.20284
YHL030W	0.29621	0.89281	0.384962
YGL063W	0.295387	1.89671	1.50103
YHR050W-A	0.295131	2.83374	2.10303
YGR144W	0.294934	1.40304	1.2031
YDL052C	0.294876	1.65251	1.33334
YLR321C	0.294571	1.40373	0.857903
YHR117W	0.294242	1.18493	1.15872
YOR328W	0.293277	0.737395	0.224233
YOR086C	0.293052	1.9329	1.33846
YDR363W	0.292827	2.70837	1.14409
YOL113W	0.291929	0.976672	0.63344
YMR149W	0.291503	1.21702	1.04232
YER178W	0.290767	1.83036	1.28334
YGR143W	0.290057	1.20597	0.924019
YML107C	0.287358	0.247481	0.862209
YHR061C	0.287275	2.06826	1.04643
YPL170W	0.287017	2.64139	1.9853
YDR317W	0.286829	-3.98059	0.579649
YMR164C	0.286745	1.02053	0.878409
YGR100W	0.286633	0.782624	0.521536
YDR507C	0.286581	1.70222	0.708639
YDL147W	0.286519	2.00916	1.58908
YGR126W	0.286393	1.06081	0.819211
YBR154C	0.285951	1.85702	0.644746
YOL077W-A	0.285568	1.18001	0.938638
YPL243W	0.28543	0.739994	0.810608
YPR110C	0.285381	-1.40687	0.601237
YDL042C	0.285235	1.58633	0.877567
YPL031C	0.284065	1.37085	1.31431
YBR121C	0.28387	1.35914	0.889914
YPR166C	0.283829	1.54503	1.3804
YIL140W	0.283396	1.4321	0.886462
YDR159W	0.282809	0.065987	0.501723
YMR186W	0.282732	1.99049	1.19728
YLR313C	0.281558	-2.02666	0.649835
YNL080C	0.280821	1.55669	1.20209
YML071C	0.280166	1.51543	0.805375
YHR062C	0.279828	1.17984	0.85633
YBL041W	0.279294	1.84171	1.43004
YBR221C	0.278812	1.76415	1.00134
YJL082W	0.278128	0.528369	0.639191
YDR228C	0.277479	1.4327	1.04543
YCR095C	0.277311	0.631586	0.473222
YOL108C	0.276673	1.12568	1.04599
YKL064W	0.276586	1.2681	1.16124
YGR123C	0.275901	1.82062	1.07096
YJR119C	0.274914	1.50804	1.15423
YDR206W	0.274712	1.30204	0.731823
YPL145C	0.273968	1.8416	1.15582
YDR152W	0.273658	2.77667	2.08995
YML057W	0.271934	2.16107	1.4333
YGL048C	0.271765	0.898946	0.390996
YNL208W	0.270754	1.6084	1.08899
YDL043C	0.270522	0.296523	0.741084
YBR114W	0.270076	2.15867	1.3442
YNL124W	0.269863	1.50008	0.873121
YOR038C	0.269505	1.94132	1.63753
YOR003W	0.268569	1.08647	0.706794
YEL023C	0.268305	1.06185	0.955175
YBR173C	0.268172	1.57043	1.07392
YMR231W	0.267917	1.46408	0.996417
YMR109W	0.266879	1.18161	0.816271
YKL065C	0.266677	1.63941	1.16958
YGR122W	0.266598	0.946011	0.690832
YDR035W	0.265887	0.661774	0.952482
YLR264W	0.265247	2.15411	1.6149
YKL088W	0.264666	0.840811	0.693583
YHR156C	0.264515	0.587063	0.443863
YHR210C	0.263707	2.34855	1.81278
YER053C	0.263626	0.420913	0.804496
YJL138C	0.263215	1.56107	1.0442
YOR288C	0.262147	2.06114	1.26073
YKL120W	0.261974	2.64347	1.77791
YPL041C	0.261122	1.01769	0.8499
YPR010C-A	0.258662	1.31967	0.944361
YLR251W	0.258133	0.471008	0.536298
YOR198C	0.257983	2.4679	2.00263
YJL049W	0.257827	0.296717	0.234677
YBR155W	0.257803	1.07485	0.562655
YJL095W	0.257302	1.64339	1.03805
YDL064W	0.256975	0.684682	0.381512
YNR054C	0.256487	1.28943	1.1213
YLR001C	0.255482	1.21578	0.911054
YOL145C	0.254941	0.650664	0.673528
YBR275C	0.254607	0.766419	0.912529
YOR098C	0.254299	3.35829	2.65353
YKL089W	0.253593	0.275099	0.755715
YFR021W	0.253525	0.892472	1.04251
YNL156C	0.253386	1.81548	1.36554
YNL077W	0.2531	1.39145	0.705237
YFL034C-B	0.252347	0.075756	0.255853
YJR010C-A	0.251671	1.1805	1.08427
YPL268W	0.251614	0.267951	0.765032
YML077W	0.2512	0.670427	1.17628
YDR144C	0.251091	1.77392	1.12071
YCL048W	0.25031	-2.57832	0.383112
YBR127C	0.249721	0.999755	0.927068
YDR354W	0.248748	1.15877	0.85051
YBR104W	0.246983	2.23277	1.17906
YJR015W	0.246555	0.772005	0.621014
YPR080W	0.244536	2.66423	1.94582
YKL124W	0.243329	1.33643	0.98832
YJR112W	0.241922	1.38859	1.18307
YBR060C	0.241169	1.48462	1.13392
YIL068C	0.241105	0.97612	0.4886
YLR229C	0.240972	1.90995	1.21964
YGR175C	0.240561	0.761472	0.642782
YDR301W	0.239967	1.01491	0.998235
YOR296W	0.239751	0.973271	0.912451
YGR001C	0.239449	-0.05737	0.411696
YPL159C	0.239274	1.86842	1.39449
YBR141C	0.238134	1.79993	1.06216
YNR064C	0.237265	0.650123	0.309375
YHR201C	0.236647	0.48142	0.655407
YDR296W	0.233667	2.09501	1.77985
YGL122C	0.23364	1.79234	1.49873
YER047C	0.233349	1.8408	0.962425
YJL060W	0.232663	0.966514	0.725326
YKL092C	0.23231	1.11237	1.00316
YNL272C	0.231541	0.478092	0.237213
YPL067C	0.231085	1.95596	1.48579
YLR129W	0.230937	1.32994	0.88167
YGR141W	0.230908	1.01799	0.23407
YML067C	0.230771	1.19563	0.791872
YHL025W	0.230684	2.25208	1.53463
YOR261C	0.230503	1.36094	1.08601
YLR337C	0.229518	1.06124	0.407834
YOL091W	0.228403	-2.42892	0.137171
YJL097W	0.228303	1.07121	0.72049
YJL001W	0.227692	1.54021	0.934626
YJR091C	0.227295	2.73783	2.00347
YHR138C	0.225656	1.50423	1.42205
YLR452C	0.224304	1.46565	0.9136
YFR006W	0.224154	1.76845	0.96189
YMR146C	0.223334	1.68691	1.18727
YKL069W	0.222986	1.16908	0.748543
YIL099W	0.222665	3.09546	2.26234
YGR131W	0.221058	1.82884	1.30536
YLR192C	0.220838	1.34419	1.26225
YDL093W	0.220788	0.899446	0.382296
YOL014W	0.220059	1.41905	0.78653
YBR008C	0.218871	-1.01262	-0.32905
YPR016C	0.218351	0.929173	1.02279
YDR449C	0.216199	1.60585	0.821977
YER058W	0.214156	1.34965	0.979787
YJR082C	0.213741	0.141802	0.911441
YOR270C	0.213052	1.34327	1.18416
YKL178C	0.212555	1.38123	0.733831
YIL121W	0.211324	2.91179	2.18037
YOR115C	0.211302	0.544971	0.896863
YDR359C	0.210798	2.235	1.81264
YOL102C	0.210327	1.50938	1.21438
YML072C	0.209692	1.69158	0.955102
YLR295C	0.209631	1.68354	1.24894
YLR403W	0.20917	2.81011	2.04663
YNL298W	0.209147	2.01163	1.09698
YBR109C	0.20883	1.17065	1.00681
YMR230W	0.2086	3.40762	2.64012
YNL271C	0.208378	1.97252	1.35429
YOL097W-A	0.207762	0.809849	0.886577
YOR089C	0.207419	1.5698	1.12721
YDR409W	0.20596	1.46979	0.816846
YNL088W	0.20536	1.75461	0.827187
YHR036W	0.205312	1.1357	0.963917
YHR047C	0.204664	2.28068	1.37143
YHR208W	0.204541	1.57414	1.06175
YIL048W	0.203611	1.66291	1.3909
YGL156W	0.203573	0.825168	0.655459
YHR068W	0.203364	1.14028	1.05908
YGR251W	0.20327	1.49426	1.13365
YJL098W	0.20229	1.94282	1.22585
YIL093C	0.20228	0.803701	0.532711
YHR103W	0.199216	1.94046	1.03906
YNL191W	0.199133	1.27208	0.638903
YNL131W	0.198921	0.726745	0.702588
YMR233W	0.198145	1.35348	1.01327
YKL009W	0.197448	1.71595	0.808253
YBR253W	0.197216	1.34911	1.1038
YJL200C	0.196832	3.07728	1.98475
YNL053W	0.196243	1.13589	1.38445
YGR060W	0.196236	-0.41172	0.565755
YKL067W	0.195439	1.7548	1.58822
YBR106W	0.195435	3.80603	2.94213
YAL005C	0.19485	2.34647	1.28558
YGR187C	0.194517	0.43153	0.364282
YNL177C	0.194117	0.773515	0.38526
YOR254C	0.193326	1.72243	1.16261
YDR497C	0.193078	2.19844	1.48453
YHR065C	0.192741	-0.19612	1.46419
YLR033W	0.189692	1.1023	0.560907
YGL106W	0.189671	1.5201	1.17283
YLR368W	0.189155	0.071971	0.324741
YCR015C	0.188646	0.510849	0.686353
YML009C	0.188567	1.77701	1.14401
YCR089W	0.186636	1.21334	0.478344
YMR041C	0.186369	3.98423	2.00986
YHL007C	0.185861	3.23283	2.10624
YBR264C	0.185551	0.83472	0.60302
YOR033C	0.185046	1.60208	0.947623
YBR283C	0.184776	3.01117	2.55774
YLL058W	0.18466	1.27917	1.05888
YBR257W	0.183628	2.07802	1.43422
YMR225C	0.182766	0.989648	0.925418
YGR128C	0.182764	1.53289	1.12564
YER139C	0.18256	1.41936	1.00886
YLL031C	0.182492	1.64447	0.857232
YIL090W	0.182045	1.57582	0.959398
YOR087W	0.181736	2.55886	1.43266
YDL129W	0.180517	2.21179	1.30487
YLR137W	0.179337	1.16692	1.03296
YDL219W	0.179334	0.879908	0.641138
YMR202W	0.17917	2.86572	1.47511
YJR022W	0.178633	0.956721	0.582384
YHR144C	0.177745	3.25028	1.84887
YGR140W	0.177732	1.62621	0.795059
YML081C-A	0.176733	1.41247	1.21077
YGR260W	0.176499	1.29921	0.681242
YKL049C	0.17636	0.608638	0.634628
YPL151C	0.175619	1.0321	0.825998
YOR020C	0.175369	1.8641	1.57343
YPL183C	0.175368	1.27134	0.576768
YDR404C	0.175041	1.8772	1.5642
YML109W	0.174995	1.01794	0.71392
YNL224C	0.174878	1.41544	0.906184
YNL024C	0.174822	0.841997	0.649683
YLR034C	0.174537	1.16075	0.8635
YNL197C	0.173471	1.83054	1.19505
YHR042W	0.173425	2.01595	1.7875
YOL119C	0.172928	1.20941	0.968021
YGR053C	0.172744	1.88649	1.12115
YLR223C	0.172678	1.60393	1.14802
YML129C	0.17229	1.6882	1.33207
YNL157W	0.17218	0.762738	0.213792
YGR270W	0.171654	1.68107	1.25716
YKR041W	0.170818	1.55249	0.665929
YLR157W-E	0.170351	0.995225	1.58257
YDR383C	0.169215	1.07268	0.801241
YLR056W	0.168668	0.611818	0.67569
YDR485C	0.168055	0.658289	0.797403
YMR004W	0.167733	1.26742	0.632596
YDR034C	0.167444	1.9255	1.50634
YJL029C	0.166313	2.26193	1.14061
YOR221C	0.166166	1.16603	1.20237
YLR459W	0.166109	0.557237	0.478947
YPL069C	0.166091	1.06101	0.670518
YDR238C	0.165929	1.23166	0.581454
YMR005W	0.165914	0.737461	0.787783
YLR094C	0.165341	3.03464	2.07956
YDR084C	0.16499	1.13978	0.843036
YMR286W	0.164623	0.823953	0.583593
YJL133W	0.162286	3.84718	3.01145
YBR179C	0.162226	2.22671	1.43693
YNL101W	0.162031	1.50161	1.05364
YJR009C	0.161449	-0.2546	0.680925
YDL045C	0.161312	0.692642	0.747535
YBR295W	0.161142	1.00015	0.248625
YPR138C	0.161134	2.90216	2.17358
YPL196W	0.160699	0.945979	0.758165
YBR250W	0.160446	1.60279	1.46889
YCR061W	0.160389	2.72639	1.80813
YBR163W	0.159019	1.30594	0.988046
YGL159W	0.157869	0.717787	0.469966
YDR128W	0.157693	0.635349	0.323475
YCR067C	0.157423	2.88143	2.66929
YLR026C	0.157394	1.3798	1.00328
YMR043W	0.156576	-0.07334	1.15202
YMR131C	0.155174	1.23279	0.757884
YDR322C-A	0.155148	1.44499	0.891964
YDR379W	0.154973	1.32182	0.999762
YIL111W	0.154849	0.923026	0.903743
YPL007C	0.154489	0.997936	1.11628
YGR247W	0.154403	1.09065	0.475929
YJR137C	0.154315	1.5172	1.00442
YKR096W	0.154227	1.22166	0.708409
YBR084W	0.153967	1.98787	1.26103
YKL101W	0.153684	2.20396	1.3115
YLR270W	0.153505	0.990452	0.779411
YGR283C	0.152361	1.46135	1.01498
YOR061W	0.151617	2.59866	1.77133
YOR056C	0.150894	1.36213	0.755673
YLR426W	0.150423	0.763548	1.05093
YDL004W	0.149849	1.45889	1.22683
YGR159C	0.147045	2.25735	1.48617
YLR421C	0.146927	1.26665	0.777394
YKL210W	0.14518	1.69654	1.22622
YGL151W	0.14454	0.961281	0.707483
YER111C	0.143586	2.69314	1.42972
YLR115W	0.143238	1.42548	0.77475
YMR253C	0.142803	0.678234	0.644107
YDL126C	0.142239	1.36999	0.874549
YPL074W	0.141767	1.19168	0.706565
YOL038W	0.141704	1.30669	0.946217
YBR214W	0.140114	0.866103	0.576875
YCR042C	0.139483	0.415882	0.529539
YDR353W	0.139352	1.46057	0.946151
YFR032C	0.1367	0.311555	0.300142
YIL117C	0.136179	2.57199	1.78978
YGL049C	0.136055	1.29481	0.496115
YER020W	0.135853	1.89243	1.4741
YNL168C	0.135149	0.782774	0.718383
YFR049W	0.131477	0.909965	0.98623
YDL080C	0.130846	1.6059	1.59987
YOL001W	0.128955	0.704101	0.643562
YJL111W	0.128463	0.958551	0.687464
YKL108W	0.128298	0.076874	0.507721
YKL039W	0.127463	1.25476	1.08149
YHL034C	0.127145	1.16527	0.318106
YBL037W	0.126771	1.10153	0.724619
YGL065C	0.125833	0.982723	0.705787
YNL005C	0.124122	1.28272	1.03901
YBR036C	0.123637	2.05729	1.03867
YHR143W-A	0.122431	1.18238	0.853256
YDR208W	0.122214	2.70648	1.79888
YBR057C	0.12193	-0.00298	0.768516
YGR231C	0.121683	1.63589	1.45772
YNL257C	0.121551	0.931964	0.959595
YEL033W	0.120988	0.091569	-0.33384
YOR286W	0.120533	1.35027	0.772792
YOR310C	0.120153	1.14131	0.74358
YGR179C	0.118548	0.10685	0.523078
YHL027W	0.117953	2.31834	1.61261
YMR259C	0.117526	1.00714	0.447307
YEL055C	0.117384	1.31716	0.663866
YLR285W	0.116649	2.04836	1.24654
YBR156C	0.11663	1.07353	1.01021
YJR134C	0.116096	1.14655	1.04995
YOR352W	0.116093	0.765573	0.402542
YDR023W	0.115591	1.34157	1.0991
YDR529C	0.11421	2.3089	1.5229
YLR265C	0.113912	0.588122	0.662601
YBR207W	0.113385	1.00604	0.56684
YDR099W	0.113342	2.55843	2.14052
YOR110W	0.113127	1.12845	0.751329
YLR424W	0.113039	1.03527	0.797435
YLR290C	0.112437	0.111284	0.739278
YGL028C	0.112223	2.24587	1.36409
YOR097C	0.111753	0.860845	0.617733
YDL040C	0.111571	1.15732	0.710335
YDR348C	0.111112	2.49984	1.5189
YAL059W	0.110784	0.8709	1.07041
YNL214W	0.109807	1.19328	0.999814
YHR137W	0.10977	3.83631	2.66601
YPL164C	0.10972	0.556794	0.664824
YLR152C	0.109596	0.797201	0.649046
YFR018C	0.109277	1.24251	0.614482
YGL201C	0.107645	0.751032	0.357621
YPL237W	0.107168	1.75429	1.54316
YGL114W	0.106752	1.19542	0.887151
YCR008W	0.105963	2.99242	1.90534
YGR125W	0.105815	-0.54254	0.617738
YML124C	0.105341	1.74085	1.22182
YML087C	0.105189	0.895606	0.799062
YGL050W	0.10459	1.80626	0.962969
YOR281C	0.104113	1.3488	0.970902
YIL030C	0.103927	2.14051	1.05604
YDR061W	0.103527	1.59913	1.2136
YER109C	0.103239	1.42845	0.893978
YDR138W	0.102687	0.723442	0.359504
YBR146W	0.102357	1.33175	0.999686
YGL164C	0.101728	0.619247	0.55767
YNL189W	0.101703	1.70106	1.06963
YDR283C	0.101535	0.824948	1.19167
YOR126C	0.101096	1.40485	0.737932
YKL047W	0.100597	1.11375	0.64916
YFL028C	0.099844	0.78047	0.56038
YOL112W	0.097552	0.230798	0.436482
YCL042W	0.096775	2.99286	2.21392
YGR092W	0.096748	2.30269	1.48366
YBR052C	0.09547	1.33388	1.15291
YOR239W	0.093476	1.05937	0.700149
YKL003C	0.093254	0.986362	0.597053
YLR283W	0.093107	1.04124	0.720558
YGR049W	0.092637	1.13732	1.05633
YJR048W	0.09257	0.564788	0.792265
YMR012W	0.092329	2.16796	1.006
YNL283C	0.092123	2.68065	1.55959
YDR213W	0.09163	1.32561	0.565625
YDR180W	0.09103	1.60767	1.07362
YJL099W	0.089867	0.529517	0.477722
YBR073W	0.08905	1.68727	1.24773
YIL014W	0.088836	2.37539	1.37702
YGL036W	0.088603	2.96873	2.14283
YOR018W	0.086124	1.43243	0.790914
YNL253W	0.0854	1.30734	1.17023
YPR118W	0.084441	1.54203	0.991898
YGR030C	0.083979	1.39313	0.771367
YPL061W	0.083478	0.394192	0.397668
YGR188C	0.081536	1.00095	0.599778
YHR088W	0.081143	1.20638	1.05605
YNL111C	0.081102	2.49817	1.9021
YMR306W	0.080723	0.689936	0.191307
YJL010C	0.080475	0.909123	0.335546
YOL054W	0.079723	2.86136	1.78839
YPR176C	0.079558	-0.32821	0.804377
YDL035C	0.079465	0.876583	0.720156
YKL140W	0.078192	-2.46295	1.50802
YLR363W-A	0.078048	0.303731	1.18877
YJL154C	0.078019	1.10269	1.43606
YGL162W	0.077781	0.91396	0.710866
YMR036C	0.077477	1.43288	1.17897
YHR026W	0.077024	1.01056	0.365262
YJL217W	0.076226	1.92691	1.2182
YDR218C	0.075921	0.347624	0.281493
YGR183C	0.075897	2.01754	1.84081
YJL193W	0.075069	0.949679	0.489207
YPR139C	0.074623	1.12982	0.437892
YER087C-B	0.074369	0.601204	0.495582
YJR142W	0.07185	-0.08218	1.06975
YAL038W	0.070859	-1.83316	-0.35588
YMR319C	0.070329	1.18515	0.43705
YGR284C	0.070096	0.970542	0.624474
YGL016W	0.069894	0.544294	0.284646
YKL075C	0.069635	0.462409	0.324914
YCR047C	0.068594	1.97393	1.39746
YER022W	0.066893	0.90373	0.434287
YNL240C	0.066862	1.22908	0.859817
YHR063C	0.066012	1.16695	0.76995
YJL008C	0.065879	1.54304	1.21926
YGR005C	0.065728	1.19999	0.907404
YDR016C	0.064962	1.24162	0.842099
YNL245C	0.0649	1.50703	1.00762
YCL061C	0.064195	0.658517	0.648314
YGR012W	0.063915	1.03729	0.975713
YJL092W	0.063143	1.00561	0.590354
YGR081C	0.062367	2.11581	1.43602
YEL024W	0.061488	2.11412	1.83747
YOL094C	0.060847	0.4219	0.956395
YGL163C	0.060229	1.47398	0.90611
YJL087C	0.059948	1.47856	0.871139
YJL073W	0.059429	1.31334	0.878167
YPL022W	0.058484	1.36796	0.999132
YER026C	0.058276	1.44857	1.01394
YHL008C	0.058148	0.884781	0.384962
YOL034W	0.058099	0.679308	0.678132
YIL138C	0.057783	-0.5843	0.731688
YFR014C	0.056895	1.46476	1.03714
YMR177W	0.05663	1.21873	0.639552
YJL167W	0.056545	1.14311	1.09684
YIL027C	0.05581	1.54777	0.917318
YNL234W	0.055773	2.28308	1.30596
YIL134W	0.055413	0.073731	0.776911
YPL008W	0.053845	1.78516	0.93348
YLR007W	0.053247	2.79822	2.27211
YOR252W	0.052829	0.801318	0.859045
YMR305C	0.052387	3.3518	2.27569
YPL193W	0.052283	1.11408	0.813422
YBR016W	0.052051	1.65614	1.13955
YKR064W	0.048971	1.36279	0.876948
YDL202W	0.048251	1.01056	2.30631
YKL105C	0.046652	1.00142	0.452605
YLR209C	0.046458	1.16627	0.840448
YMR047C	0.0462	1.08598	0.917281
YLR052W	0.045348	1.12146	0.717416
YNL067W	0.045032	1.98192	1.4301
YPL186C	0.044771	0.825457	0.518007
YKR026C	0.044384	0.115064	1.10591
YLR293C	0.043939	2.33742	1.70516
YMR077C	0.043898	1.32891	0.791023
YOR118W	0.043489	0.920423	0.65219
YBR125C	0.043086	1.38247	0.836433
YKL090W	0.042906	0.667583	0.939339
YDR410C	0.042784	1.63991	1.31796
YBR028C	0.04246	-1.32269	0.479152
YGL209W	0.042292	2.34928	1.56712
YCL047C	0.041847	-0.20371	0.509409
YIL046W-A	0.041719	1.91964	1.30359
YDR312W	0.041187	1.16775	0.632576
YBL056W	0.040693	1.71269	1.07801
[truncated: 1,758 more rows]
