# Supplementary material for: Specialization of the chromatin remodeler RSC to mobilize partially-unwrapped nucleosomes
Source: eLife journal article supplement (doi:10.7554/elife.58130), 2020-06-04
Supplement: supp [file elife-58130-supp-v1.zip › elife_poa_e58130_Figure_5_source_data_3.xlsx]

## Sheet: rsc1_vs_WT
id	gene_name	biotype	chromosome	description	baseMean	log2FoldChange	lfcSE	stat	pvalue	padj
15S_rRNA		rRNA	Mito	Ribosomal RNA of the small mitochondrial ribosomal subunit; MSU1 allele suppresses ochre stop mutations in mitochondrial protein-coding genes	1140.71	-0.384791	0.592241	-0.652225	0.514256	0.707215
21S_rRNA		rRNA	Mito	Mitochondrial 21S rRNA; intron encodes the I-SceI DNA endonuclease	2478.09	-0.188261	0.64262	-0.300996	0.763418	0.880548
HRA1		ncRNA	I	Non-protein-coding RNA; substrate of RNase P, possibly involved in rRNA processing, specifically maturation of 20S precursor into the mature 18S rRNA	6.97376	0.877174	0.626647	1.35612	0.175062	0.367761
ICR1		ncRNA	IX	Long intergenic regulatory ncRNA; has a key role in regulating transcription of the nearby protein-coding ORF FLO11; initiated far upstream from FLO11 and transcribed across much of the large promoter of FLO11, repressing FLO11 transcription in cis	210.359	0.287356	0.142444	2.01805	0.0435857	0.14692
LSR1		snRNA	II	U2 spliceosomal RNA (U2 snRNA), component of the spliceosome; pairs with the branchpoint sequence; functionally equivalent to mammalian U2 snRNA; stress-induced pseudouridylations at positions 56 and 93 may contribute to regulation of splicing	114201	0.22197	0.113225	1.96042	0.0499464	0.161144
NME1		snoRNA	XIV	RNA component of RNase MRP; RNase MRP cleaves pre-rRNA and has a role in cell cycle-regulated degradation of daughter cell-specific mRNAs; human ortholog is implicated in cartilage-hair hypoplasia (CHH)	11366.3	-0.0307785	0.180991	-0.170046	0.864974	0.933214
PWR1		ncRNA	IX	Intergenic regulatory ncRNA; one of two long ncRNAs that play key roles in regulating transcription of the nearby protein-coding ORF FLO11; PWR1 promotes FLO11 transcription by interfering with ncRNA ICR1, which is transcribed across the FLO11 promoter	6.54197	0.190078	0.728199	0.302368	0.762371	0.880164
Q0010		protein_coding	Mito	Dubious open reading frame; unlikely to encode a protein, based on available experimental and comparative sequence data; partially overlaps the dubious ORF Q0017	17.7519	0.858239	0.649235	1.43406	0.151555	0.335509
Q0017		protein_coding	Mito	Dubious open reading frame; unlikely to encode a protein, based on available experimental and comparative sequence data; partially overlaps the dubious ORF Q0010	3.97366	-0.40488	0.738915	-0.572875	0.566729	0.746199
Q0032		protein_coding	Mito	Dubious open reading frame; unlikely to encode a functional protein, based on available experimental and comparative sequence data	10.5622	0.177617	0.611212	0.315819	0.75214	0.874239
Q0045	COX1	protein_coding	Mito	Subunit I of cytochrome c oxidase (Complex IV); Complex IV is the terminal member of the mitochondrial inner membrane electron transport chain; one of three mitochondrially-encoded subunits	7422.64	0.0857037	0.673856	0.129724	0.896785	0.950044
Q0050	AI1	protein_coding	Mito	Reverse transcriptase required for splicing of the COX1 pre-mRNA; encoded by a mobile group II intron within the mitochondrial COX1 gene	47735.1	0.357002	0.690068	0.52974	0.596292	0.76719
Q0055	AI2	protein_coding	Mito	Reverse transcriptase required for splicing of the COX1 pre-mRNA; encoded by a mobile group II intron within the mitochondrial COX1 gene	26912.6	0.189596	0.681663	0.283551	0.776754	0.888624
Q0060	AI3	protein_coding	Mito	Endonuclease I-SceIII; encoded by a mobile group I intron within the mitochondrial COX1 gene	843.138	0.10851	0.645825	0.170206	0.864848	0.933214
Q0065	AI4	protein_coding	Mito	Endonuclease I-SceII; encoded by a mobile group I intron within the mitochondrial COX1 gene; intron is normally spliced by the BI4p maturase but AI4p can mutate to acquire the same maturase activity	1718.59	0.064986	0.665201	0.0985247	0.921516	0.963999
Q0070	AI5_ALPHA	protein_coding	Mito	Endonuclease I-SceIV; involved in intron mobility; encoded by a mobile group I intron within the mitochondrial COX1 gene	155.57	-0.198927	0.57402	-0.347772	0.728011	0.85704
Q0075	AI5_BETA	protein_coding	Mito	Protein of unknown function; encoded within an intron of the mitochondrial COX1 gene; translational initiation codon is predicted to be ATA rather than ATG	493.604	-0.06931	0.63361	-0.108863	0.913311	0.959482
Q0080	ATP8	protein_coding	Mito	Subunit 8 of the F0 sector of mitochondrial F1F0 ATP synthase; encoded on the mitochondrial genome; ATP8 and ATP6 mRNAs are not translated in the absence of the F1 sector of ATPase	8.69377	0.505544	0.656414	0.783827	0.433142	0.638946
Q0085	ATP6	protein_coding	Mito	Subunit a of the F0 sector of mitochondrial F1F0 ATP synthase; mitochondrially encoded; translation is specifically activated by Atp22p; ATP6 and ATP8 mRNAs are not translated in the absence of the F1 sector of ATPase	3475.79	0.42778	0.691543	0.631466	0.527736	0.718866
Q0092		protein_coding	Mito	Dubious open reading frame; unlikely to encode a functional protein, based on available experimental and comparative sequence data	3.55466	1.51245	0.747047	1.96014	0.0499793	0.161166
Q0105	COB	protein_coding	Mito	Cytochrome b; mitochondrially encoded subunit of the ubiquinol-cytochrome c reductase complex which includes Cobp, Rip1p, Cyt1p, Cor1p, Qcr2p, Qcr6p, Qcr7p, Qcr8p, Qcr9p, and Qcr10p	5227.23	0.174236	0.682186	0.259955	0.794898	0.897241
Q0110	BI2	protein_coding	Mito	Mitochondrial mRNA maturase with a role in splicing; encoded by both exon and intron sequences of partially processed COB mRNA	362.895	-0.127969	0.627883	-0.203694	0.838592	0.91916
Q0115	BI3	protein_coding	Mito	Mitochondrial mRNA maturase; forms a complex with Mrs1p to mediate splicing of the bI3 intron of the COB gene; encoded by both exon and intron sequences of partially processed COB mRNA	127.942	-0.211606	0.589378	-0.36051	0.718466	0.850637
Q0120	BI4	protein_coding	Mito	Mitochondrial mRNA maturase; forms a complex with Nam2p to mediate splicing of the bI4 intron of the COB gene; encoded by both exon and intron sequences of partially processed COB mRNA	883.644	0.0258387	0.666403	0.0395581	0.968445	0.987097
Q0130	OLI1	protein_coding	Mito	F0-ATP synthase subunit c (ATPase-associated proteolipid); encoded on the mitochondrial genome; mutation confers oligomycin resistance; expression is specifically dependent on the nuclear genes AEP1 and AEP2	8066.27	-0.0641781	0.702521	-0.090408	0.927963	0.965524
Q0140	VAR1	protein_coding	Mito	Mitochondrial ribosomal protein of the small subunit; mitochondrially-encoded; polymorphic in different strains due to variation in number of AAT (asparagine) codons; translated near the mitochondrial inner membrane; may have a role in loss of mitochondrial DNA under stress conditions	174.78	0.0900159	0.634622	0.140761	0.888059	0.944308
Q0142		protein_coding	Mito	Dubious open reading frame; unlikely to encode a functional protein, based on available experimental and comparative sequence data; partially overlaps dubious open reading frame Q0143	9.54626	0.0646748	0.632007	0.112595	0.910352	0.957271
Q0143		protein_coding	Mito	Dubious open reading frame; unlikely to encode a functional protein, based on available experimental and comparative sequence data	11.7024	0.959649	0.619917	1.56927	0.116586	0.281963
Q0144		protein_coding	Mito	Dubious open reading frame; unlikely to encode a functional protein, based on available experimental and comparative sequence data	7.57254	0.171143	0.723264	0.257609	0.796709	0.898464
Q0160	SCEI	protein_coding	Mito	I-SceI DNA endonuclease; encoded by the mitochondrial group I intron of the 21S_rRNA gene; mediates gene conversion that propagates the intron into intron-less copies of the 21S_rRNA gene	1361.33	0.0459818	0.653683	0.0731628	0.941677	0.973427
Q0182		protein_coding	Mito	Dubious open reading frame; unlikely to encode a functional protein, based on available experimental and comparative sequence data	288.766	0.120623	0.644656	0.189963	0.849338	0.924615
Q0250	COX2	protein_coding	Mito	Subunit II of cytochrome c oxidase (Complex IV); Complex IV is the terminal member of the mitochondrial inner membrane electron transport chain; one of three mitochondrially-encoded subunits	7374.88	0.109803	0.677157	0.163203	0.870358	0.935211
Q0255		protein_coding	Mito	Maturase-like protein	442.051	0.351623	0.652218	0.539989	0.589204	0.761266
Q0275	COX3	protein_coding	Mito	Subunit III of cytochrome c oxidase (Complex IV); Complex IV is the terminal member of the mitochondrial inner membrane electron transport chain; one of three mitochondrially-encoded subunits	7423.47	0.126264	0.684454	0.186852	0.851776	0.926191
RDN5-1		rRNA	XII	5S ribosomal RNA (5S rRNA); only complete sequence of 6 repeated RDN5 alleles; able to support viability when provided as sole form of 5S rRNA; component of the large (60S) ribosomal subunit; localized to the nucleolus via interaction with Rpl5p; may play a role in translational frame fidelity; transcription is mediated by PolIII and activated by TFIIIA and TFIIIE	2.92657	0.619621	0.747851	1.08909	0.276115
RNA170		ncRNA	XIII	RNA polymerase III transcribed RNA of unknown function; conserved in other yeast species	21.9456	1.49864	0.486687	3.03713	0.00238846	0.0198462
RPM1		ncRNA	Mito	RNA component of mitochondrial RNase P; mitochondrial RNase P also contains the protein subunit Rpm2p; RNase P removes 5' extensions from mitochondrial tRNA precursors; RPM1 is conserved in bacteria, fungi, and protozoa	304.347	-0.0986828	0.632367	-0.155289	0.876593	0.938805
RPR1		ncRNA	V	RNA component of nuclear RNase P; nuclear RNase P cleaves tRNA precursors to generate mature 5' ends and facilitates turnover of nuclear RNAs; may be responsible for recognition of substrate tRNAs	14598	0.0706189	0.15746	0.448479	0.653807	0.808251
RUF20		ncRNA	VI	RNA of Unknown Function	36.8591	-0.446331	0.317314	-1.40557	0.159853	0.346571
RUF21		ncRNA	VI	RNA of Unknown Function	4.90614	0.0950721	0.744187	0.282442	0.777605	0.889039
RUF22		ncRNA	VI	RNA of Unknown Function; precise location of 3' end uncertain; RUF22 may be longer than currently annotated	4.60879	-0.822484	0.720321	-1.33861	0.180697	0.374541
RUF23		ncRNA	VI	RNA of Unknown Function; precise location of 3' end uncertain; RUF23 may be longer than currently annotated	4.77338	0.391314	0.722516	0.691898	0.489001	0.686973
SCR1		ncRNA	V	RNA subunit of the Signal Recognition Particle (SRP)	353004	-0.00478791	0.126248	-0.0379249	0.969748	0.987741
snR10		snoRNA	VII	H/ACA box small nucleolar RNA (snoRNA); essential gene required for for preRNA processing, specifically for cleavage at sites A1 and A2; also guides pseudouridylation of large subunit (LSU) rRNA at position U2923	750.821	-0.546853	0.203735	-2.68363	0.00728277	0.043262
snR11		snoRNA	XIII	H/ACA box small nucleolar RNA (snoRNA); guides pseudouridylation of large subunit (LSU) rRNA at position U2416	2674.45	0.3827	0.181636	2.10709	0.0351094	0.127085
snR128		snoRNA	X	C/D box small nucleolar RNA (snoRNA); referred to as U14; essential gene required for cleavage of 35S primary rRNA transcript to release the precursor to the 18S rRNA; guides 2'-O-methylation of small subunit (SSU) rRNA at position C414	586.726	-0.329389	0.322526	-1.02114	0.30719	0.514437
snR13		snoRNA	IV	C/D box small nucleolar RNA (snoRNA); guides 2'-O-methylation of large subunit (LSU) rRNA at positions A2280 and A2281	1703.46	-0.0287514	0.31356	-0.0916645	0.926965	0.965524
snR14		snRNA	V	U4 spliceosomal RNA (U4 snRNA); interacts with U6	312.922	0.170369	0.276011	0.61728	0.53705	0.72657
snR161		snoRNA	II	H/ACA small nucleolar RNA (snoRNA); guides pseudouridylation of small subunit (SSU) rRNA at positions U632 and U766	179.279	0.162887	0.223705	0.727332	0.467022	0.669717
snR17a		snoRNA	XV	Small nucleolar RNA (snoRNA) U3; part of Small ribosomal SubUnit (SSU) processosome; SNR17B also encodes snoRNA U3	94583.4	0.12859	0.112402	1.14402	0.252614	0.456287
snR17b		snoRNA	XVI	Small nucleolar RNA (snoRNA) U3; part of small (ribosomal) subunit (SSU) processosome; SNR17A also encodes snoRNA U3	9821.01	-0.122864	0.155233	-0.791488	0.428659	0.635066
snR18		snoRNA	I	C/D box small nucleolar RNA (snoRNA); commonly referred to as U18; guides 2'-O-methylation of large subunit (LSU) rRNA at positions A649 and C650	132.577	0.206298	0.241809	0.853429	0.393421	0.601784
snR189		snoRNA	III	H/ACA box small nucleolar RNA (snoRNA); guides pseudouridylation of large subunit (LSU) rRNA at position U2735 and small subunit (SSU) rRNA at position U466	783.588	0.19576	0.311725	0.628339	0.529782	0.721022
snR19		snRNA	XIV	U1 spliceosomal RNA (U1 snRNA); snRNA U1 homolog	41012.1	0.0983501	0.104533	0.940849	0.346782	0.555355
snR190		snoRNA	X	C/D box small nucleolar RNA (snoRNA); predicted to guide 2'-O-methylation of large subunit (LSU) rRNA at position G2395; not shown to be active	8612.56	-0.0227923	0.177733	-0.128204	0.897987	0.950644
snR191		snoRNA	XIV	H/ACA box small nucleolar RNA (snoRNA); guides pseudouridylation of large subunit (LSU) rRNA at positions U2258 and U2260; encoded within the intron of NOG2/YNR053C	3682.14	-0.143506	0.16719	-0.85832	0.390716	0.600323
snR24		snoRNA	XIII	C/D box small nucleolar RNA (snoRNA); commonly referred to as U24; guides 2'-O-methylation of large subunit (LSU) rRNA at positions C1437, C1449, and C1450	49.326	0.312308	0.253861	1.22795	0.219467	0.420377
snR3		snoRNA	X	H/ACA box small nucleolar RNA (snoRNA); guides pseudouridylation of large subunit (LSU) rRNA at positions U2129, U2133, and U2264	4595.49	0.442848	0.308903	1.43469	0.151375	0.335351
snR30		snoRNA	XII	H/ACA box small nucleolar RNA (snoRNA); essential gene required for cleavage of 35S primary rRNA transcript to release the precursor to the 18S rRNA	61486.3	-0.0979844	0.168972	-0.579889	0.561989	0.743283
snR31		snoRNA	XV	H/ACA box small nucleolar RNA (snoRNA); guides pseudouridylation of small subunit (SSU) rRNA at position U999	3010.09	-0.213762	0.203696	-1.04939	0.293999	0.501398
snR32		snoRNA	VIII	H/ACA box small nucleolar RNA (snoRNA); guides pseudouridylation of large subunit (LSU) rRNA at position U2191	1211.16	0.206957	0.20243	1.02264	0.306477	0.514015
snR33		snoRNA	III	H/ACA box small nucleolar RNA (snoRNA); guides pseudouridylation of large subunit (LSU) rRNA at position U1042	1432.04	0.195315	0.198414	0.984346	0.324945	0.532544
snR34		snoRNA	XII	H/ACA box small nucleolar RNA (snoRNA); guides pseudouridylation of large subunit (LSU) rRNA at positions U2826 and U2880	3158.84	0.407573	0.207175	1.96749	0.0491262	0.159164
snR35		snoRNA	XV	H/ACA box small nucleolar RNA (snoRNA); predicted to guide pseudouridylation of small subunit (SSU) rRNA at position 1191	2524.42	-0.0345474	0.245209	-0.140816	0.888015	0.944308
snR36		snoRNA	XV	H/ACA box small nucleolar RNA (snoRNA); guides pseudouridylation of small subunit (SSU) rRNA at position U1187	128.047	-0.114447	0.291418	-0.392575	0.694634	0.833776
snR37		snoRNA	X	H/ACA box small nucleolar RNA (snoRNA); guides pseudouridylation of large subunit (LSU) rRNA at position U2944	69496.9	0.178811	0.120927	1.47867	0.139228	0.318676
snR38		snoRNA	XI	C/D box small nucleolar RNA (snoRNA); guides 2'-O-methylation of large subunit (LSU) rRNA at position G2815	32.9692	0.0270154	0.367816	0.0727028	0.942043	0.973428
snR39		snoRNA	VII	C/D box small nucleolar RNA (snoRNA); guides 2'-O-methylation of large subunit (LSU) rRNA at position A807	152.291	0.0625754	0.199984	0.313008	0.754274	0.87573
snR39B		snoRNA	VII	C/D box small nucleolar RNA (snoRNA); guides 2'-O-methylation of large subunit (LSU) rRNA at position G805	48.1278	-0.690571	0.336214	-2.05459	0.0399186	0.137795
snR4		snoRNA	V	C/D box small nucleolar RNA (snoRNA) but not shown to be active; no target site is predicted within the ribosomal RNAs	3275.09	0.317635	0.169668	1.87213	0.0611886	0.184706
snR40		snoRNA	XIV	C/D box small nucleolar RNA (snoRNA); guides 2'-O-methylation of large subunit (LSU) rRNA at position U898 and small subunit (SSU) rRNA at position G1271	165.443	-0.21976	0.319749	-0.685632	0.492945	0.690202
snR41		snoRNA	XVI	C/D box small nucleolar RNA (snoRNA); guides 2'-O-methylation of small subunit (SSU) rRNA at positions A541 and G1126	147.321	-0.247415	0.210559	-1.175	0.239996	0.441781
snR42		snoRNA	XI	H/ACA box small nucleolar RNA (snoRNA); guides pseudouridylation of large subunit (LSU) rRNA at position U2975	9793.05	-0.132003	0.118879	-1.11041	0.266822	0.471269
snR43		snoRNA	III	H/ACA box small nucleolar RNA (snoRNA); guides pseudouridylation of large subunit (LSU) rRNA at position U966 and of 5.8S rRNA at position 73	2048.96	0.208391	0.244122	0.854177	0.393007	0.601597
snR44		snoRNA	XII	H/ACA box small nucleolar RNA (snoRNA); guides pseudouridylation of large subunit (LSU) rRNA at position U1056 and small subunit (SSU) rRNA at position U106	580.765	-0.142669	0.233241	-0.611773	0.540688	0.729267
snR45		snoRNA	XVI	C/D box small nucleolar RNA (snoRNA) but not shown to be active; no target site is predicted within the ribosomal RNAs	518.453	-0.0602383	0.245226	-0.245525	0.80605	0.904261
snR46		snoRNA	VII	H/ACA box small nucleolar RNA (snoRNA); guides pseudouridylation of large subunit (LSU) rRNA at position U2865	1737.82	0.262907	0.197771	1.32962	0.183644	0.377942
snR47		snoRNA	IV	C/D box small nucleolar RNA (snoRNA); guides 2'-O-methylation of large subunit (LSU) rRNA at position A2220 and small subunit (SSU) rRNA at position A619	248.025	0.29896	0.358995	0.833222	0.40472	0.612696
snR48		snoRNA	VII	C/D box small nucleolar RNA (snoRNA); guides 2'-O-methylation of large subunit (LSU) rRNA at positions G2791 and G2793	16.3657	-0.131829	0.452119	-0.285663	0.775136	0.887703
snR49		snoRNA	XIV	H/ACA box small nucleolar RNA (snoRNA); guides pseudouridylation of large subunit (LSU) rRNA at position U990 and small subunit (SSU) rRNA at positions U120, U211, and U302	423.109	-0.399937	0.353679	-1.13019	0.258395	0.461864
snR5		snoRNA	XV	H/ACA box small nucleolar RNA (snoRNA); guides pseudouridylation of large subunit (LSU) rRNA at positions U1004 and U1124	6660.7	-0.125519	0.2435	-0.515455	0.606235	0.773715
snR50		snoRNA	XV	C/D box small nucleolar RNA (snoRNA); guides 2'-O-methylation of large subunit (LSU) rRNA at position G867	31.5805	-0.73593	0.340575	-2.15743	0.0309721	0.117204
snR51		snoRNA	XVI	C/D box small nucleolar RNA (snoRNA); guides 2'-O-methylation of large subunit (LSU) rRNA at position U2729 and small subunit (SSU) rRNA at position A100	34.6093	-0.39895	0.272872	-1.46329	0.143387	0.324289
snR52		snoRNA	V	C/D box small nucleolar RNA (snoRNA); guides 2'-O-methylation of large subunit (LSU) rRNA at position U2921 and small subunit (SSU) rRNA at position A420	146.742	0.349663	0.277114	1.26156	0.207108	0.405542
snR53		snoRNA	V	C/D box small nucleolar RNA (snoRNA); guides 2'-O-methylation of small subunit (SSU) rRNA at position A796	5.80358	0.35448	0.574994	0.618957	0.535944	0.725763
snR54		snoRNA	XIII	C/D box small nucleolar RNA (snoRNA); guides 2'-O-methylation of small subunit (SSU) rRNA at position A974	20.6413	0.11523	0.44389	0.261059	0.794047	0.8971
snR55		snoRNA	XII	C/D box small nucleolar RNA (snoRNA); predicted to guide 2'-O-methylation of small subunit (SSU) rRNA at position U1269	39.8868	-0.05823	0.327926	-0.17608	0.860231	0.929508
snR56		snoRNA	II	C/D box small nucleolar RNA (snoRNA); guides 2'-O-methylation of small subunit (SSU) rRNA at position G1428	58.7429	-0.16759	0.325838	-0.513077	0.607897	0.774714
snR57		snoRNA	XII	C/D box small nucleolar RNA (snoRNA); guides 2'-O-methylation of small subunit (SSU) rRNA at position G1572	90.4519	-0.176878	0.226391	-0.782919	0.433675	0.639427
snR59		snoRNA	XVI	C/D box small nucleolar RNA (snoRNA); guides 2'-O-methylation of large subunit (LSU) rRNA at position A807	9.47989	0.0118867	0.535866	0.0225143	0.982038	0.993444
snR6		snRNA	XII	U6 spliceosomal RNA (U6 snRNA); mediates catalysis of pre-mRNA splicing by the spliceosome; interacts with U4; homology to U6 snRNA, interacts with snr14	121.963	0.123211	0.455935	0.269865	0.787264	0.894019
snR60		snoRNA	X	C/D box small nucleolar RNA (snoRNA); guides 2'-O-methylation of large subunit (LSU) rRNA at positions A817 and G908	20.7362	-0.944869	0.438807	-2.13763	0.0325464	0.120896
snR61		snoRNA	XII	C/D box small nucleolar RNA (snoRNA); guides 2'-O-methylation of large subunit (LSU) rRNA at position A1133	10.9741	0.638668	0.488017	1.29288	0.196052	0.392801
snR62		snoRNA	XV	C/D box small nucleolar RNA (snoRNA); guides 2'-O-methylation of large subunit (LSU) rRNA at position U1888	31.3792	-0.214501	0.335624	-0.640777	0.521668	0.713594
snR63		snoRNA	IV	C/D box small nucleolar RNA (snoRNA); guides 2'-O-methylation of large subunit (LSU) rRNA at position A2256	5477.58	0.0468134	0.209475	0.223507	0.823141	0.913089
snR64		snoRNA	XI	C/D box small nucleolar RNA (snoRNA); guides 2'-O-methylation of large subunit (LSU) rRNA at position C2337	28.1541	-0.663777	0.340742	-1.9428	0.0520398	0.165988
snR65		snoRNA	III	C/D box small nucleolar RNA (snoRNA); guides 2'-O-methylation of large subunit (LSU) rRNA at position U2347	9.67322	-1.35607	0.539532	-2.45123	0.0142369	0.069189
snR66		snoRNA	XIV	C/D box small nucleolar RNA (snoRNA); guides 2'-O-methylation of large subunit (LSU) rRNA at position U2417	41.0004	-0.258719	0.34269	-0.754371	0.450627	0.654108
snR67		snoRNA	V	C/D box small nucleolar RNA (snoRNA); guides 2'-O-methylation of large subunit (LSU) rRNA at positions G2619 and U2724	345.579	0.0375065	0.231919	0.161601	0.87162	0.93559
snR68		snoRNA	IX	C/D box small nucleolar RNA (snoRNA); guides 2'-O-methylation of large subunit (LSU) rRNA at position A2640	62.2371	0.645722	0.366349	1.76153	0.0781487	0.216584
snR69		snoRNA	XI	C/D box small nucleolar RNA (snoRNA); guides 2'-O-methylation of large subunit (LSU) rRNA at position C2948	21.2713	-0.74758	0.39663	-1.88376	0.0595975	0.182097
snR7-L		snRNA	VII	U5 spliceosomal RNA (U5 snRNA), long form; associated with spliceosome	587.655	-0.279248	0.252607	-1.10549	0.268946	0.47332
snR70		snoRNA	XVI	C/D box small nucleolar RNA (snoRNA); predicted to guide 2'-O-methylation of small subunit (SSU) rRNA at position C1639	816.898	0.0400736	0.20795	0.19259	0.84728	0.92374
snR71		snoRNA	VIII	C/D box small nucleolar RNA (snoRNA); guides 2'-O-methylation of large subunit (LSU) rRNA at position A2946	19.9172	0.0581213	0.419381	0.140615	0.888174	0.944308
snR72		snoRNA	XIII	C/D box small nucleolar RNA (snoRNA); guides 2'-O-methylation of large subunit (LSU) rRNA at position A876	11.1733	0.0775034	0.514246	0.158643	0.873951	0.9363
snR73		snoRNA	XIII	C/D box small nucleolar RNA (snoRNA); guides 2'-O-methylation of large subunit (LSU) rRNA at position C2959	72.9267	0.152218	0.290094	0.525602	0.599165	0.769464
snR74		snoRNA	XIII	C/D box small nucleolar RNA (snoRNA); guides 2'-O-methylation of small subunit (SSU) rRNA at position A28	20.0635	0.447437	0.378394	1.17679	0.239279	0.44173
snR75		snoRNA	XIII	C/D box small nucleolar RNA (snoRNA); guides 2'-O-methylation of large subunit (LSU) rRNA at position G2288	32.4463	-0.382591	0.273849	-1.3995	0.161663	0.349364
snR76		snoRNA	XIII	C/D box small nucleolar RNA (snoRNA); guides 2'-O-methylation of large subunit (LSU) rRNA at position C2197	85.1477	-0.220464	0.240562	-0.916649	0.359326	0.568653
snR77		snoRNA	XIII	C/D box small nucleolar RNA (snoRNA); guides 2'-O-methylation of small subunit (SSU) rRNA at position U578	77.5549	-0.0524227	0.287876	-0.181755	0.855775	0.927892
snR78		snoRNA	XIII	C/D box small nucleolar RNA (snoRNA); guides 2'-O-methylation of large subunit (LSU) rRNA at position U2421	37.1131	-0.211418	0.350935	-0.600391	0.548246	0.733975
snR79		snoRNA	XII	C/D box small nucleolar RNA (snoRNA); guides 2'-O-methylation of small subunit (SSU) rRNA at position C1007	17.8502	0.310759	0.439937	0.706415	0.47993	0.679855
snR8		snoRNA	XV	H/ACA box small nucleolar RNA (snoRNA); guides pseudouridylation of large subunit (LSU) rRNA at positions U960 and U986	1309.31	-0.332575	0.217643	-1.52789	0.126539	0.299692
snR80		snoRNA	V	H/ACA box small nucleolar RNA (snoRNA); guides pseudouridylation of large subunit (LSU) rRNA at position U776 and small subunit (SSU) rRNA at position U759	1351.67	0.146457	0.295393	0.496052	0.619857	0.782364
snR81		snoRNA	XV	H/ACA box small nucleolar RNA (snoRNA); guides pseudouridylation of large subunit (LSU) rRNA at position U1052, constitutive pseudouridylation of U2 snRNA (LSR1) at position 42, and stress-induced U2 pseudouridylation at position 93	261.595	-0.11661	0.266049	-0.437824	0.661514	0.813319
snR82		snoRNA	VII	H/ACA box small nucleolar RNA (snoRNA); guides pseudouridylation of large subunit (LSU) rRNA at positions U1110, U2349, and U2351	8515.33	-0.0293553	0.127421	-0.23034	0.817827	0.910342
snR83		snoRNA	XIII	H/ACA box small nucleolar RNA (snoRNA); guides pseudouridylation of small subunit (SSU) rRNA at positions U1290 and U1415	18100.3	0.0760673	0.124234	0.612294	0.540343	0.729121
snR84		snoRNA	IV	H/ACA box small nucleolar RNA (snoRNA); guides pseudouridylation of large subunit (LSU) rRNA at position U2266	10694.4	-0.0685649	0.121305	-0.56523	0.571917	0.74992
snR85		snoRNA	XIII	H/ACA box small nucleolar RNA (snoRNA); predicted to guide pseudouridylation of small subunit (SSU) rRNA at position U1181	96.7957	-0.0374605	0.246275	-0.150655	0.880248	0.940291
snR86		snoRNA	XIII	H/ACA box small nucleolar RNA (snoRNA); guides pseudouridylation of large subunit (LSU) rRNA at position U2314	50152.9	0.327333	0.140184	2.33505	0.0195409	0.0861124
snR87		snoRNA	XI	C/D box small nucleolar RNA (snoRNA); guides 2'-O-methylation of small subunit (SSU) rRNA at position A436	24.2548	0.10438	0.364173	0.286507	0.77449	0.887498
snR9		snoRNA	XV	H/ACA box small nucleolar RNA (snoRNA); guides pseudouridylation of large subunit (LSU) rRNA at position U2340	11421.5	0.32432	0.320899	1.01115	0.311943	0.518394
SRG1		ncRNA	V	Non-protein-coding RNA that regulates the transcription of SER3; expression of SRG1 RNA represses expression of its neighboring gene SER3 via a transcription-interference mechanism	259.994	0.269754	0.276747	0.97626	0.328935	0.537372
tD(GUC)G2		tRNA	VII	Aspartate tRNA (tRNA-Asp), predicted by tRNAscan-SE analysis	2.59911	0.933857	0.728741	1.35418	0.175679
tD(GUC)N		tRNA	XIV	Aspartate tRNA (tRNA-Asp), predicted by tRNAscan-SE analysis	3.1897	1.32533	0.706817	1.73955	0.0819389	0.222176
tD(GUC)O		tRNA	XV	Aspartate tRNA (tRNA-Asp), predicted by tRNAscan-SE analysis	2.23184	0.0713777	0.750508	0.264381	0.791487
tE(UUC)L		tRNA	XII	Glutamate tRNA (tRNA-Glu), predicted by tRNAscan-SE analysis; thiolation of uridine at wobble position (34) requires Ncs6p; target of K. lactis zymocin	1.62013	-0.149888	0.749634	-0.150513	0.88036
tE(UUC)Q		tRNA	Mito	Mitochondrial glutamate tRNA (tRNA-Glu); predicted by tRNAscan-SE analysis	6.10933	-0.327274	0.742482	-0.571628	0.567574	0.746199
tG(GCC)D2		tRNA	IV	Glycine tRNA (tRNA-Gly), predicted by tRNAscan-SE analysis	8.85133	0.358741	0.487583	0.722221	0.470159	0.671407
tG(GCC)P1		tRNA	XVI	Glycine tRNA (tRNA-Gly), predicted by tRNAscan-SE analysis	4.0464	-0.202132	0.700445	-0.276119	0.782457	0.892171
tG(UCC)Q		tRNA	Mito	Mitochondrial glycine tRNA (tRNA-Gly); predicted by tRNAscan-SE analysis	7.50718	0.465396	0.707742	0.728962	0.466025	0.66892
tH(GUG)G2		tRNA	VII	Histidine tRNA (tRNA-His), predicted by tRNAscan-SE analysis	9.10867	0.487107	0.613477	0.816137	0.414422	0.621431
tH(GUG)Q		tRNA	Mito	Mitochondrial histidine tRNA (tRNA-His); predicted by tRNAscan-SE analysis	10.6537	0.501513	0.668327	0.782217	0.434087	0.639741
tI(AAU)N1		tRNA	XIV	Isoleucine tRNA (tRNA-Ile), predicted by tRNAscan-SE analysis	2.68517	0.523781	0.748491	0.910179	0.362728
tI(GAU)Q		tRNA	Mito	Mitochondrial isoleucine tRNA (tRNA-Ile); predicted by tRNAscan-SE analysis; mutations in human ortholog are linked to conditions such as progressive encephalopathy, metabolic syndrome, and hypomagnesaemia	1.48126	-0.337405	0.726381	-0.565085	0.572016
tI(UAU)D		tRNA	IV	Isoleucine tRNA (tRNA-Ile), predicted by tRNAscan-SE analysis	6.37026	-0.249251	0.609086	-0.400265	0.688961	0.830521
tK(UUU)O		tRNA	XV	Lysine tRNA (tRNA-Lys), predicted by tRNAscan-SE analysis; thiolation of uridine at wobble position (34) requires Ncs6p	11.198	-0.441501	0.488984	-0.899916	0.368165	0.577903
tK(UUU)P		tRNA	XVI	Lysine tRNA (tRNA-Lys), predicted by tRNAscan-SE analysis; thiolation of uridine at wobble position (34) requires Ncs6p	2.92098	-0.333808	0.694939	-0.481366	0.630256
tK(UUU)Q		tRNA	Mito	Mitochondrial lysine tRNA (tRNA-Lys); predicted by tRNAscan-SE analysis; modification of wobble base U34 is decreased at elevated temperatures, decreasing ability to decode AAG codons; this function is performed at high temperature by imported cytoplasmic tRNA-Lys with CUU anticodon	16.0413	-0.25685	0.592065	-0.440401	0.659647	0.812124
tL(CAA)C	SUP53	tRNA	III	Leucine tRNA (tRNA-Leu), predicted by tRNAscan-SE analysis; can mutate to suppress amber nonsense mutations	5.07864	0.189672	0.748846	0.409959	0.681836	0.824994
tL(CAA)L		tRNA	XII	Leucine tRNA (tRNA-Leu), predicted by tRNAscan-SE analysis	2.79294	-0.100571	0.724934	-0.138643	0.889732
tL(GAG)G		tRNA	VII	Leucine tRNA (tRNA-Leu), predicted by tRNAscan-SE analysis; not essential for viability even though this is the only tRNA that decodes GAG codons	4.52653	-0.126732	0.700047	-0.226145	0.821089	0.911676
tL(UAA)Q		tRNA	Mito	Mitochondrial leucine tRNA (tRNA-Leu); predicted by tRNAscan-SE analysis; required for mitochondrial translation and indirectly for maintenance of the mitochondrial genome; mutations in the orthologous human gene cause the neurological disease MELAS	5.29435	0.481129	0.720619	0.950574	0.341821	0.551704
tL(UAG)L1		tRNA	XII	Leucine tRNA (tRNA-Leu), predicted by tRNAscan-SE analysis	5.39164	0.449775	0.59318	0.699731	0.484095	0.684029
TLC1		ncRNA	II	RNA template component of telomerase; TLC1 RNA contains a template sequence that Est2p uses to add irregular repeats of TG(1-3) residues onto a DNA end; promoter regulated by the cell cycle dependent transcriptional activators Swi4p/Swi6p and Mbp1p/Swi6p	2944.97	-0.0629548	0.188836	-0.333432	0.738808	0.865261
tM(CAU)E	IMT4	tRNA	V	Methionine initiator tRNA (tRNA-Met); predicted by tRNAscan-SE analysis; one of four initiator methionine tRNAs in yeast that are functional for translation	4.31498	0.104073	0.660593	0.150246	0.880571	0.940291
tN(GUU)N1		tRNA	XIV	Asparagine tRNA (tRNA-Asn), predicted by tRNAscan-SE analysis	4.31216	1.59897	0.665924	2.20146	0.0277035	0.108839
tN(GUU)P		tRNA	XVI	Asparagine tRNA (tRNA-Asn), predicted by tRNAscan-SE analysis	11.7112	1.72339	0.522757	3.16401	0.00155611	0.014703
tN(GUU)Q		tRNA	Mito	Mitochondrial asparagine tRNA (tRNA-Asn); predicted by tRNAscan-SE analysis	3.86073	-0.0386962	0.743583	0.0799079	0.936311	0.970243
tP(UGG)O3		tRNA	XV	Proline tRNA (tRNA-Pro), predicted by tRNAscan-SE analysis; target of K. lactis zymocin	3.32109	-1.25805	0.694744	-1.71222	0.0868557	0.231457
tP(UGG)Q		tRNA	Mito	Mitochondrial proline tRNA (tRNA-Pro)	22.4217	0.393529	0.543386	0.734079	0.4629	0.666438
tQ(CUG)M	CDC65	tRNA	XIII	Glutamine tRNA (tRNA-Gln), predicted by tRNAscan-SE analysis; can mutate to cause constitutive pseudohyphal growth in homozygous diploids	3.59568	0.664903	0.701455	0.94611	0.344092	0.553725
tQ(UUG)Q		tRNA	Mito	Mitochondrial glutamine tRNA (tRNA-Gln); predicted by tRNAscan-SE analysis; thiolation of uridine at wobble position (34) requires Ncs6p	9.79009	-0.49343	0.639557	-0.780302	0.435213	0.641083
tR(ACG)Q2		tRNA	Mito	Mitochondrial arginine tRNA (tRNA-Arg); predicted by tRNAscan-SE analysis	3.01408	0.0968791	0.735409	0.14771	0.882572
tR(UCU)Q1		tRNA	Mito	Mitochondrial arginine tRNA (tRNA-Arg); predicted by tRNAscan-SE analysis	4.69766	0.0138382	0.738624	0.0646232	0.948474	0.977765
tS(GCU)Q1		tRNA	Mito	Mitochondrial serine tRNA (tRNA-Ser); predicted by tRNAscan-SE analysis	17.7498	0.487324	0.610492	0.79767	0.425062	0.632164
tS(UGA)Q2		tRNA	Mito	Mitochondrial serine tRNA (tRNA-Ser); predicted by tRNAscan-SE analysis	21.0815	-0.000677647	0.653938	-0.00221711	0.998231	0.99904
tT(UGU)G2		tRNA	VII	Threonine tRNA (tRNA-Thr), predicted by tRNAscan-SE analysis	3.86693	-0.314153	0.624143	-0.503403	0.614681	0.779496
tT(UGU)Q1		tRNA	Mito	Mitochondrial threonine tRNA (tRNA-Thr); predicted by tRNAscan-SE analysis	5.69264	0.693116	0.742201	1.08012	0.280089	0.48532
tV(AAC)G3		tRNA	VII	Valine tRNA (tRNA-Val), predicted by tRNAscan-SE analysis	4.01009	-0.27377	0.651385	-0.424204	0.671417	0.818253
tV(CAC)D		tRNA	IV	Valine tRNA (tRNA-Val), predicted by tRNAscan-SE analysis	2.4285	-0.427242	0.741289	-0.587607	0.556796
tW(CCA)G1		tRNA	VII	Tryptophan tRNA (tRNA-Trp), predicted by tRNAscan-SE analysis	5.80617	0.0356213	0.602025	0.0594145	0.952622	0.980094
tW(CCA)P		tRNA	XVI	Tryptophan tRNA (tRNA-Trp), predicted by tRNAscan-SE analysis	6.64819	0.411688	0.628266	0.651463	0.514748	0.707215
tX(XXX)D		tRNA	IV	tRNA of undetermined specificity, predicted by tRNAscan-SE analysis; very similar to serine tRNAs	3.55298	-0.336248	0.680588	-0.498467	0.618155	0.781654
tY(GUA)D	SUP2	tRNA	IV	Tyrosine tRNA (tRNA-Tyr), predicted by tRNAscan-SE analysis; can mutate to suppress ochre nonsense mutations	3.50896	-0.147432	0.746388	-0.358406	0.72004	0.851731
tY(GUA)Q		tRNA	Mito	Mitochondrial tyrosine tRNA (tRNA-Tyr)	5.18013	0.342139	0.666274	0.550529	0.581957	0.756362
YAL001C	TFC3	protein_coding	I	Subunit of RNA polymerase III transcription initiation factor complex; part of the TauB domain of TFIIIC that binds DNA at the BoxB promoter sites of tRNA and similar genes; cooperates with Tfc6p in DNA binding; largest of six subunits of the RNA polymerase III transcription initiation factor complex (TFIIIC)	925.787	0.129967	0.125128	1.03869	0.298947	0.506617
YAL002W	VPS8	protein_coding	I	Membrane-binding component of the CORVET complex; involved in endosomal vesicle tethering and fusion in the endosome to vacuole protein targeting pathway; interacts with Vps21p; contains RING finger motif	828.637	0.253247	0.120979	2.09381	0.0362772	0.129598
YAL003W	EFB1	protein_coding	I	Translation elongation factor 1 beta; stimulates nucleotide exchange to regenerate EF-1 alpha-GTP for the next elongation cycle; part of the EF-1 complex, which facilitates binding of aminoacyl-tRNA to the ribosomal A site	7132.35	-0.439219	0.183489	-2.39339	0.0166934	0.077351
YAL005C	SSA1	protein_coding	I	ATPase involved in protein folding and NLS-directed nuclear transport; member of HSP70 family; forms chaperone complex with Ydj1p; localized to nucleus, cytoplasm, and cell wall; 98% identical with paralog Ssa2p, but subtle differences between the two proteins provide functional specificity with respect to propagation of yeast	3897.11	0.0643873	0.230296	0.279473	0.779881	0.890508
YAL007C	ERP2	protein_coding	I	Member of the p24 family involved in ER to Golgi transport; similar to Emp24p and Erv25p; role in misfolded protein quality control; forms a heterotrimeric complex with Erp1p, Emp24p, and Erv25p; localized to COPII-coated vesicles; ERP2 has a paralog, ERP4, that arose from the whole genome duplication	660.689	-0.270026	0.163704	-1.64913	0.0991206	0.253084
YAL008W	FUN14	protein_coding	I	Mitochondrial protein of unknown function	128.333	0.333065	0.181211	1.83599	0.0663591	0.195778
YAL009W	SPO7	protein_coding	I	Putative regulatory subunit of Nem1p-Spo7p phosphatase holoenzyme; regulates nuclear growth by controlling phospholipid biosynthesis, required for normal nuclear envelope morphology, premeiotic replication, and sporulation	140.511	0.136929	0.144315	0.94615	0.344072	0.553725
YAL010C	MDM10	protein_coding	I	Subunit of both the ERMES and the SAM complex; component of ERMES complex which acts as a molecular tether between the mitochondria and the ER, necessary for efficient phospholipid exchange between organelles and for mitophagy; SAM/TOB complex component that functions in the assembly of outer membrane beta-barrel proteins; involved in mitochondrial inheritance and morphology; ERMES complex is oft…	257.197	0.0682796	0.12681	0.539615	0.589463	0.761441
YAL011W	SWC3	protein_coding	I	Protein of unknown function; component of the SWR1 complex, which exchanges histone variant H2AZ (Htz1p) for chromatin-bound histone H2A; required for formation of nuclear-associated array of smooth endoplasmic reticulum known as karmellae	250.54	0.0300939	0.127159	0.237545	0.812234	0.908464
YAL012W	CYS3	protein_coding	I	Cystathionine gamma-lyase; catalyzes one of the two reactions involved in the transsulfuration pathway that yields cysteine from homocysteine with the intermediary formation of cystathionine; protein abundance increases in response to DNA replication stress	2524.71	-0.225778	0.182314	-1.23852	0.215524	0.415952
YAL013W	DEP1	protein_coding	I	Component of the Rpd3L histone deacetylase complex; required for diauxic shift-induced histone H2B deposition onto rDNA genes; transcriptional modulator involved in regulation of structural phospholipid biosynthesis genes and metabolically unrelated genes, as well as maintenance of telomeres, mating efficiency, and sporulation	162.401	0.0298357	0.161713	0.188421	0.850547	0.925251
YAL014C	SYN8	protein_coding	I	Endosomal SNARE related to mammalian syntaxin 8	308.995	0.00020666	0.139533	0.00164099	0.998691	0.999252
YAL015C	NTG1	protein_coding	I	DNA N-glycosylase and apurinic/apyrimidinic (AP) lyase; involved in base excision repair; acts in both nucleus and mitochondrion; creates a double-strand break at mtDNA origins that stimulates replication in response to oxidative stress; required for maintaining mitochondrial genome integrity; NTG1 has a paralog, NTG2, that arose from the whole genome duplication	222.434	0.579998	0.177609	3.26523	0.00109375	0.0116811
YAL016C-A		protein_coding	I	Dubious open reading frame; unlikely to encode a functional protein, based on available experimental and comparative sequence data; partially overlaps ORF TPD3/YAL016W	2.65978	0.286463	0.727179	0.47349	0.635864
YAL016W	TPD3	protein_coding	I	Regulatory subunit A of the heterotrimeric PP2A complex; the heterotrimeric protein phosphatase 2A (PP2A) complex also contains regulatory subunit Cdc55p and either catalytic subunit Pph21p or Pph22p; required for cell morphogenesis and transcription by RNA polymerase III	1694.06	-0.192518	0.121634	-1.58277	0.113473	0.27704
YAL017W	PSK1	protein_coding	I	PAS domain-containing serine/threonine protein kinase; coordinately regulates protein synthesis and carbohydrate metabolism and storage in response to a unknown metabolite that reflects nutritional status; PSK1 has a paralog, PSK2, that arose from the whole genome duplication	1614.63	0.25591	0.104922	2.4394	0.0147115	0.0707711
YAL018C	LDS1	protein_coding	I	Protein Involved in spore wall assembly; localizes to lipid droplets found on or outside of the prospore membrane; shares similarity with Lds2p and Rrt8p, and a strain mutant for all 3 genes exhibits reduced dityrosine fluorescence relative to the single mutants	8.90618	1.1891	0.666095	1.87442	0.0608732	0.184081
YAL019W	FUN30	protein_coding	I	Snf2p family member with ATP-dependent chromatin remodeling activity; has a role in silencing at the mating type locus, telomeres and centromeres; enriched at centromeres and is required for correct chromatin structure around centromeres, as well as at the boundary element of the silent HMR; recruited to DNA double-strand breaks (DSBs) where it promotes 5' strand resection of DSBs; potential Cdc2…	1464.37	-0.179606	0.102645	-1.74979	0.0801547	0.219644
YAL020C	ATS1	protein_coding	I	Protein required for modification of wobble nucleosides in tRNA; acts with Elongator complex, Kti11p, and Kti12p; has a potential role in regulatory interactions between microtubules and the cell cycle	73.1108	-0.0379229	0.236281	-0.161283	0.87187	0.935656
YAL021C	CCR4	protein_coding	I	Component of the CCR4-NOT transcriptional complex; CCR4-NOT is involved in regulation of gene expression; component of the major cytoplasmic deadenylase, which is involved in mRNA poly(A) tail shortening	964.506	0.0422945	0.136514	0.309831	0.75669	0.877207
YAL022C	FUN26	protein_coding	I	High affinity, broad selectivity, nucleoside/nucleobase transporter; vacuolar membrane localized transporter which may regulate the balance of nicotinamide riboside (NmR) levels between the cytosol and vacuole, contributing to salvage of NmR for use in cytosolic NAD+ synthesis; equilibrative nucleoside transporter (ENT) family member	586.068	0.0195096	0.122299	0.159125	0.87357	0.936217
YAL023C	PMT2	protein_coding	I	Protein O-mannosyltransferase of the ER membrane; transfers mannose residues from dolichyl phosphate-D-mannose to protein serine/threonine residues; involved in ER quality control; acts in a complex with Pmt1p, can instead interact with Pmt5p; antifungal drug target; PMT2 has a paralog, PMT3, that arose from the whole genome duplication	2652.66	-0.316836	0.14858	-2.13228	0.0329839	0.122195
YAL024C	LTE1	protein_coding	I	Protein similar to GDP/GTP exchange factors; without detectable GEF activity; required for asymmetric localization of Bfa1p at daughter-directed spindle pole bodies and for mitotic exit at low temperatures	615.295	0.0754852	0.119727	0.630284	0.528509	0.719708
YAL025C	MAK16	protein_coding	I	Essential nuclear protein; constituent of 66S pre-ribosomal particles; required for maturation of 25S and 5.8S rRNAs; required for maintenance of M1 satellite double-stranded RNA of the L-A virus	223.608	-0.203948	0.217678	-0.936704	0.348911	0.557752
YAL026C	DRS2	protein_coding	I	Trans-golgi network aminophospholipid translocase (flippase); maintains membrane lipid asymmetry in post-Golgi secretory vesicles; contributes to clathrin-coated vesicle formation and endocytosis; subject to auto-inhibition by its C-terminal tail; mutations in human homolog ATP8B1 result in liver disease	1607.43	0.00837754	0.0644011	0.129998	0.896568	0.949977
YAL026C-A		protein_coding	I	Dubious open reading frame; unlikely to encode a functional protein, based on available experimental and comparative sequence data; partially overlaps the uncharacterized ORF YAL027W and the verified gene DRS2	122.488	-0.0643198	0.242784	-0.264753	0.791199	0.89579
YAL027W	SAW1	protein_coding	I	5'- and 3'-flap DNA binding protein; recruits Rad1p-Rad10p to single-strand annealing intermediates with 3' non-homologous tails for removal during double-strand break repair; complexes with Rad1p-Rad10p and stimulates its endonuclease activity; green fluorescent protein (GFP)-fusion protein localizes to the nucleus	99.6901	0.038175	0.174211	0.217087	0.828141	0.914611
YAL028W	FRT2	protein_coding	I	Tail-anchored ER membrane protein of unknown function; interacts with homolog Frt1p; promotes growth in conditions of high Na+, alkaline pH, or cell wall stress, possibly via a role in posttranslational translocation; potential Cdc28p substrate; FRT2 has a paralog, FRT1, that arose from the whole genome duplication	181.468	0.517252	0.226619	2.28459	0.0223371	0.0941029
YAL029C	MYO4	protein_coding	I	Type V myosin motor involved in actin-based transport of cargos; required for mRNA transport, including ASH1 mRNA, and facilitating the growth and movement of ER tubules into the growing bud along with She3p; MYO4 has a paralog, MYO2, that arose from the whole genome duplication	2088.08	-0.0148794	0.0997998	-0.14904	0.881522	0.940795
YAL030W	SNC1	protein_coding	I	Vesicle membrane receptor protein (v-SNARE); involved in the fusion between Golgi-derived secretory vesicles with the plasma membrane; proposed to be involved in endocytosis; member of the synaptobrevin/VAMP family of R-type v-SNARE proteins; SNC1 has a paralog, SNC2, that arose from the whole genome duplication	185.324	0.146397	0.147183	0.992445	0.32098	0.527444
YAL031C	GIP4	protein_coding	I	Cytoplasmic protein that regulates protein phosphatase 1 Glc7p; protein overexpression relocalizes Glc7p from the nucleus and prevents chromosome segregation; potential Cdc28p substrate	566.921	0.235772	0.163299	1.44465	0.148557	0.331607
YAL032C	PRP45	protein_coding	I	Protein required for pre-mRNA splicing; associates with the spliceosome and interacts with splicing factors Prp22p and Prp46p; orthologous to human transcriptional coactivator SKIP and can activate transcription of a reporter gene	262.928	0.117631	0.128973	0.912541	0.361484	0.57068
YAL033W	POP5	protein_coding	I	Subunit of both RNase MRP and nuclear RNase P; RNase MRP cleaves pre-rRNA, while nuclear RNase P cleaves tRNA precursors to generate mature 5' ends and facilitates turnover of nuclear RNAs	172.044	-0.296939	0.183258	-1.62047	0.105132	0.263011
YAL034C	FUN19	protein_coding	I	Non-essential protein of unknown function; expression induced in response to heat stress; FUN19 has a paralog, YOR338W, that arose from the whole genome duplication	373.045	0.488528	0.195322	2.50312	0.0123104	0.0620242
YAL034W-A	MTW1	protein_coding	I	Essential component of the MIND kinetochore complex; joins kinetochore subunits contacting DNA to those contacting microtubules; critical to kinetochore assembly; complex consists of Mtw1p Including Nnf1p-Nsl1p-Dsn1p (MIND)	60.0977	-0.740458	0.237735	-3.11326	0.00185036	0.0167455
YAL035W	FUN12	protein_coding	I	Translation initiation factor eIF5B; GTPase that promotes Met-tRNAiMet binding to ribosomes and ribosomal subunit joining; promotes GTP-dependent maturation of 18S rRNA by Nob1p; protein abundance increases in response to DNA replication stress; homolog of bacterial IF2	3321.09	-0.494184	0.187279	-2.63863	0.00832429	0.0479268
YAL036C	RBG1	protein_coding	I	Member of the DRG family of GTP-binding proteins; associates with translating ribosomes; interacts with Tma46p, Ygr250cp, Gir2p and Yap1p via two-hybrid	566.811	-0.104456	0.170538	-0.6126	0.540141	0.729007
YAL037C-B		protein_coding	I	Dubious open reading frame; unlikely to encode a functional protein, based on available experimental and comparative sequence data; identified by gene-trapping, microarray-based expression analysis, and genome-wide homology searching	9.20605	-0.532997	0.481365	-1.10786	0.267922	0.472415
YAL037W		protein_coding	I	Putative protein of unknown function; YAL037W has a paralog, YOR342C, that arose from the whole genome duplication	59.3966	0.00168057	0.364167	0.00295772	0.99764	0.99904
YAL038W	CDC19	protein_coding	I	Pyruvate kinase; functions as a homotetramer in glycolysis to convert phosphoenolpyruvate to pyruvate, the input for aerobic (TCA cycle) or anaerobic (glucose fermentation) respiration; regulated via allosteric activation by fructose bisphosphate; CDC19 has a paralog, PYK2, that arose from the whole genome duplication	53104.2	-0.53487	0.19221	-2.78223	0.00539864	0.0355228
YAL039C	CYC3	protein_coding	I	Cytochrome c heme lyase (holocytochrome c synthase); attaches heme to apo-cytochrome c (Cyc1p or Cyc7p) in the mitochondrial intermembrane space; human ortholog may have a role in microphthalmia with linear skin defects (MLS)	216.344	-0.391792	0.21501	-1.82254	0.0683725	0.199148
YAL040C	CLN3	protein_coding	I	G1 cyclin involved in cell cycle progression; activates Cdc28p kinase to promote the G1 to S phase transition; plays a role in regulating transcription of the other G1 cyclins, CLN1 and CLN2; regulated by phosphorylation and proteolysis; acetly-CoA induces CLN3 transcription in response to nutrient repletion to promote cell-cycle entry.	400.45	0.263135	0.263921	0.997854	0.31835	0.525363
YAL041W	CDC24	protein_coding	I	Guanine nucleotide exchange factor for Cdc42p; also known as a GEF or GDP-release factor; required for polarity establishment and maintenance, and mutants have morphological defects in bud formation and shmooing; relocalizes from nucleus to cytoplasm upon DNA replication stress	950.619	-0.0414713	0.0882633	-0.469404	0.638781	0.796154
YAL042C-A		protein_coding	I	Dubious open reading frame; unlikely to encode a functional protein, based on available experimental and comparative sequence data; partially overlaps verified ORF ERV46/YAL042W; YAL042C-A is a non-essential gene	3.24447	-0.377892	0.714169	-0.537232	0.591107	0.763086
YAL042W	ERV46	protein_coding	I	Protein localized to COPII-coated vesicles; forms a complex with Erv41p; involved in the membrane fusion stage of transport	1287.13	-0.418493	0.0984324	-4.25156	2.12282e-05	0.000603781
YAL043C	PTA1	protein_coding	I	Subunit of holo-CPF; holo-CPF is a multiprotein complex and functional homolog of mammalian CPSF, required for the cleavage and polyadenylation of mRNA and snoRNA 3' ends; involved in pre-tRNA processing; binds to the phosphorylated CTD of RNAPII	822.384	-0.161647	0.114739	-1.40851	0.158979	0.3455
YAL044C	GCV3	protein_coding	I	H subunit of the mitochondrial glycine decarboxylase complex; glycine decarboxylase is required for the catabolism of glycine to 5,10-methylene-THF; also required for all protein lipoylation; expression is regulated by levels of 5,10-methylene-THF	1389.25	-0.201589	0.238296	-0.845993	0.397556	0.605707
YAL044W-A		protein_coding	I	Putative protein of unknown function; similar to S. pombe uvi31 which is a putative DNA repair protein	195.453	0.120647	0.142589	0.844695	0.398281	0.606512
YAL045C		protein_coding	I	Dubious open reading frame; unlikely to encode a functional protein, based on available experimental and comparative sequence data; almost completely overlaps YAL044W-A	3.88015	-0.0992061	0.720477	-0.0548992	0.956219	0.982321
YAL046C	AIM1	protein_coding	I	Protein involved in mitochondrial function or organization; null mutant displays elevated frequency of mitochondrial genome loss	136.339	0.139794	0.170457	0.81878	0.412912	0.620071
YAL047C	SPC72	protein_coding	I	Component of the cytoplasmic Tub4p (gamma-tubulin) complex; binds spindle pole bodies and links them to microtubules; is regulated by Cdc5 kinase; has roles in astral microtubule formation and stabilization	231.884	0.144224	0.124783	1.15589	0.247726	0.451822
YAL048C	GEM1	protein_coding	I	Outer mitochondrial membrane GTPase, subunit of the ERMES complex; potential regulatory subunit of the ERMES complex that links the ER to mitochondria and may promote inter-organellar calcium and phospholipid exchange as well as coordinating mitochondrial DNA replication and growth; cells lacking Gem1p contain collapsed, globular, or grape-like mitochondria; ortholog of metazoan Miro GTPases	346.309	0.624702	0.269999	2.31321	0.0207113	0.0897685
YAL049C	AIM2	protein_coding	I	Cytoplasmic protein involved in mitochondrial function or organization; null mutant displays reduced frequency of mitochondrial genome loss; potential Hsp82p interactor	265.871	-0.805643	0.151557	-5.31452	1.06938e-07	9.29606e-06
YAL051W	OAF1	protein_coding	I	Oleate-activated transcription factor; subunit of a heterodimeric complex with Pip2p, which binds to oleate-response elements (ORE) in the promoter of genes involved in beta-oxidation of fatty acids, peroxisome organization and biogenesis, activating transcription in the presence of oleate; regulates chromatin silencing at telomeres; involved in diauxic shift; OAF1 has a paralog, PIP2, that arose…	669.469	0.209548	0.104198	2.01138	0.0442855	0.14871
YAL053W	FLC2	protein_coding	I	Putative FAD transporter; required for uptake of FAD into endoplasmic reticulum; involved in cell wall maintenance; FLC2 has a paralog, YOR365C, that arose from the whole genome duplication	2132.19	0.858125	0.123221	6.96477	3.28941e-12	1.06854e-09
YAL054C	ACS1	protein_coding	I	Acetyl-coA synthetase isoform; along with Acs2p, acetyl-coA synthetase isoform is the nuclear source of acetyl-coA for histone acetylation; expressed during growth on nonfermentable carbon sources and under aerobic conditions	86.033	0.274489	0.247411	1.10963	0.267157	0.471382
YAL055W	PEX22	protein_coding	I	Putative peroxisomal membrane protein; required for import of peroxisomal proteins; functionally complements a Pichia pastoris pex22 mutation	33.1093	0.065429	0.292982	0.221958	0.824347	0.913605
YAL056W	GPB2	protein_coding	I	Multistep regulator of cAMP-PKA signaling; inhibits PKA downstream of Gpa2p and Cyr1p, thereby increasing cAMP dependency; inhibits Ras activity through direct interactions with Ira1p/2p; regulated by G-alpha protein Gpa2p; GPB2 has a paralog, GPB1, that arose from the whole genome duplication	1286.96	0.260302	0.134462	1.93609	0.0528568	0.16747
YAL058W	CNE1	protein_coding	I	Calnexin; integral membrane ER chaperone involved in folding and quality control of glycoproteins; chaperone activity is inhibited by Mpd1p, with which Cne1p interacts; 24% identical to mammalian calnexin; Ca+ binding not yet shown in yeast	195.79	0.135214	0.160595	0.839071	0.40143	0.609502
YAL059W	ECM1	protein_coding	I	Pre-ribosomal factor involved in 60S ribosomal protein subunit export; associates with the pre-60S particle; shuttles between the nucleus and cytoplasm	300.603	-0.633217	0.219312	-2.88688	0.00389083	0.0278061
YAL060W	BDH1	protein_coding	I	NAD-dependent (R,R)-butanediol dehydrogenase; catalyzes oxidation of (R,R)-2,3-butanediol to (3R)-acetoin, oxidation of meso-butanediol to (3S)-acetoin, and reduction of acetoin; enhances use of 2,3-butanediol as an aerobic carbon source	923.367	-0.62484	0.263692	-2.36885	0.0178434	0.0806612
YAL061W	BDH2	protein_coding	I	Putative medium-chain alcohol dehydrogenase with similarity to BDH1; transcription induced by constitutively active PDR1 and PDR3	226.327	0.853373	0.432126	1.98937	0.0466604	0.154327
YAL062W	GDH3	protein_coding	I	NADP(+)-dependent glutamate dehydrogenase; synthesizes glutamate from ammonia and alpha-ketoglutarate; rate of alpha-ketoglutarate utilization differs from Gdh1p; expression regulated by nitrogen and carbon sources; GDH3 has a paralog, GDH1, that arose from the whole genome duplication	85.2667	1.71618	0.391822	4.35771	1.31431e-05	0.000414619
YAL063C	FLO9	protein_coding	I	Lectin-like protein with similarity to Flo1p; thought to be expressed and involved in flocculation	15.771	0.896217	0.448818	1.973	0.0484959	0.15792
YAL063C-A		protein_coding	I	Putative protein of unknown function; identified by expression profiling and mass spectrometry	4.01422	-0.369524	0.652676	-0.569356	0.569114	0.747356
YAL064C-A	TDA8	protein_coding	I	Putative protein of unknown function; null mutant is sensitive to expression of the top1-T722A allele; not an essential gene	2.057	-0.387801	0.746522	-0.625865	0.531403
YAL064W		protein_coding	I	Protein of unknown function; may interact with ribosomes, based on co-purification experiments	3.27712	0.79569	0.719238	1.17552	0.239785	0.441781
YAL064W-B		protein_coding	I	Fungal-specific protein of unknown function	11.2261	0.386292	0.463875	0.820232	0.412084	0.619431
YAL067C	SEO1	protein_coding	I	Putative permease; member of the allantoate transporter subfamily of the major facilitator superfamily; mutation confers resistance to ethionine sulfoxide	61.2477	0.852657	0.453912	1.94577	0.0516829	0.165022
YAL069W		protein_coding	I	Dubious open reading frame; unlikely to encode a functional protein, based on available experimental and comparative sequence data	2.371	-0.723624	0.750129	-1.14194	0.253478
YAR002C-A	ERP1	protein_coding	I	Member of the p24 family involved in ER to Golgi transport; role in misfolded protein quality control; forms heterotrimeric complex with Erp2p, Emp24p, and Erv25p; localized to COPII-coated vesicles; ERP1 has a paralog, ERP6, that arose from the whole genome duplication	995.509	-0.259194	0.147355	-1.75885	0.0786026	0.21716
YAR002W	NUP60	protein_coding	I	FG-nucleoporin component of central core of the nuclear pore complex; contributes directly to nucleocytoplasmic transport and maintenance of the nuclear pore complex (NPC) permeability barrier and is involved in gene tethering at the nuclear periphery; relocalizes to the cytosol in response to hypoxia; both NUP1 and NUP60 are homologous to human NUP153	620.87	-0.0889329	0.117096	-0.759543	0.447528	0.651454
YAR003W	SWD1	protein_coding	I	Subunit of the COMPASS (Set1C) complex; COMPASS methylates histone H3 on lysine 4 and is required in transcriptional silencing near telomeres; WD40 beta propeller superfamily member with similarity to mammalian Rbbp7	232.779	0.144914	0.139723	1.03787	0.299332	0.507126
YAR007C	RFA1	protein_coding	I	Subunit of heterotrimeric Replication Protein A (RPA); RPA is a highly conserved single-stranded DNA binding protein involved in DNA replication, repair, and recombination; RPA protects against inappropriate telomere recombination, and upon telomere uncapping, prevents cell proliferation by a checkpoint-independent pathway; role in DNA catenation/decatenation pathway of chromosome disentangling; …	666.037	-0.314243	0.129638	-2.42415	0.0153443	0.0729621
YAR008W	SEN34	protein_coding	I	Subunit of the tRNA splicing endonuclease; tRNA splicing endonuclease is composed of Sen2p, Sen15p, Sen34p, and Sen54p; Sen34p contains the active site for tRNA 3' splice site cleavage and has similarity to Sen2p and to Archaeal tRNA splicing endonuclease	95.1974	-0.39772	0.249068	-1.59729	0.110202	0.271631
YAR009C		protein_coding	I	Retrotransposon TYA Gag and TYB Pol genes; in YARCTY1-1 TYB is mutant and probably non-functional; protein product forms cytoplasmic foci upon DNA replication stress	118.775	0.542442	0.256631	2.10939	0.0349109	0.126555
YAR014C	BUD14	protein_coding	I	Protein involved in bud-site selection; Bud14p-Glc7p complex is a cortical regulator of dynein; inhibitor of the actin assembly factor Bnr1p (formin); diploid mutants display a random budding pattern instead of the wild-type bipolar pattern; relative distribution to the nucleus increases upon DNA replication stress	850.241	-0.107842	0.0955893	-1.12829	0.259199	0.462764
YAR015W	ADE1	protein_coding	I	N-succinyl-5-aminoimidazole-4-carboxamide ribotide synthetase; required for 'de novo' purine nucleotide biosynthesis; red pigment accumulates in mutant cells deprived of adenine; protein abundance increases in response to DNA replication stress	1278.74	-1.11932	0.355321	-3.14462	0.00166303	0.0153971
YAR018C	KIN3	protein_coding	I	Nonessential serine/threonine protein kinase; possible role in DNA damage response; influences tolerance to high levels of ethanol	299.426	0.0379584	0.158484	0.239844	0.810451	0.907329
YAR019C	CDC15	protein_coding	I	Protein kinase of the Mitotic Exit Network; localized to the spindle pole bodies at late anaphase; promotes mitotic exit by directly switching on the kinase activity of Dbf2p; required for spindle disassembly after meiosis II; relocalizes to the cytoplasm upon DNA replication stress	376.845	0.0884088	0.147228	0.602823	0.546626	0.733083
YAR019W-A		protein_coding	I	Dubious open reading frame; unlikely to encode a functional protein, based on available experimental and comparative sequence data; partially overlaps ORF CDC15/YAR019C	2.763	0.0660435	0.732039	0.164933	0.868997
YAR020C	PAU7	protein_coding	I	Member of the seripauperin multigene family; active during alcoholic fermentation, regulated by anaerobiosis, inhibited by oxygen, repressed by heme	12.1446	0.0709711	0.488605	0.164658	0.869213	0.934794
YAR023C		protein_coding	I	Putative integral membrane protein; member of DUP240 gene family	54.2153	-0.156245	0.283582	-0.550532	0.581955	0.756362
YAR027W	UIP3	protein_coding	I	Putative integral membrane protein of unknown function; interacts with Ulp1p at the nuclear periphery; member of DUP240 gene family	376.889	0.0448532	0.138123	0.32513	0.745083	0.869587
YAR028W		protein_coding	I	Putative integral membrane protein; member of DUP240 gene family; GFP-fusion protein is induced in response to the DNA-damaging agent MMS	371.673	1.21203	0.215784	5.61697	1.94332e-08	2.14181e-06
YAR029W		protein_coding	I	Member of DUP240 gene family but contains no transmembrane domains; green fluorescent protein (GFP)-fusion protein localizes to the cytoplasm in a punctate pattern	91.579	1.42484	0.28534	4.98413	6.2241e-07	3.83702e-05
YAR030C		protein_coding	I	Dubious open reading frame; unlikely to encode a functional protein, based on available experimental and comparative sequence data; partially overlaps the uncharacterized ORF YAR029W and the verified gene PRM9	10.7741	0.663369	0.501926	1.32055	0.186651	0.382115
YAR031W	PRM9	protein_coding	I	Pheromone-regulated protein; contains 3 predicted transmembrane segments and an FF sequence, a motif involved in COPII binding; member of DUP240 gene family; PRM9 has a paralog, PRM8, that arose from a segmental duplication	39.8485	1.41443	0.299527	4.67615	2.92308e-06	0.000128607
YAR033W	MST28	protein_coding	I	Putative integral membrane protein, involved in vesicle formation; forms complex with Mst27p; member of DUP240 gene family; binds COPI and COPII vesicles; MST28 has a paralog, MST27, that arose from a segmental duplication	28.1244	0.346477	0.344598	0.994082	0.320183	0.527343
YAR035W	YAT1	protein_coding	I	Outer mitochondrial carnitine acetyltransferase; minor ethanol-inducible enzyme involved in transport of activated acyl groups from the cytoplasm into the mitochondrial matrix; phosphorylated	178.735	1.95361	0.394074	4.94311	7.68843e-07	4.56279e-05
YAR042W	SWH1	protein_coding	I	Protein similar to mammalian oxysterol-binding protein; contains ankyrin repeats; localizes to the Golgi and the nucleus-vacuole junction; SWH1 has a paralog, OSH2, that arose from the whole genome duplication	1039.58	-0.0474117	0.16235	-0.29206	0.77024	0.88478
YAR047C		protein_coding	I	Dubious open reading frame; unlikely to encode a functional protein, based on available experimental and comparative sequence data	13.7347	0.647284	0.493576	1.30616	0.191498	0.387136
YAR050W	FLO1	protein_coding	I	Lectin-like protein involved in flocculation; cell wall protein that binds mannose chains on the surface of other cells, confers floc-forming ability that is chymotrypsin sensitive and heat resistant; FLO1 has a paralog, FLO5, that arose from a segmental duplication	44.3365	0.305425	0.325453	0.958301	0.337911	0.547254
YAR071W	PHO11	protein_coding	I	One of three repressible acid phosphatases; glycoprotein that is transported to the cell surface by the secretory pathway; induced by phosphate starvation and coordinately regulated by PHO4 and PHO2; PHO11 has a paralog, PHO12, that arose from a segmental duplication	7.63618	0.85558	0.54011	1.51785	0.129053	0.303208
YAR073W	IMD1	protein_coding	I	Nonfunctional protein with homology to IMP dehydrogenase; blocked reading frame, located close to the telomere; not expressed at detectable levels; YAR073W and YAR075W comprise a continuous reading frame in most strains of S. cerevisiae; YAR073W/YAR075W together have a paralog, IMD2, that arose from a segmental duplication	4.96062	0.212579	0.661314	0.321007	0.748205	0.871635
YAR075W		protein_coding	I	Non-functional protein with homology IMP dehydrogenase; YAR073W/IMD1 and YAR075W comprise a continuous reading frame in most strains of S. cerevisiae; YAR073W/YAR075W together have a paralog, IMD2, that arose from a segmental duplication	2.73584	-0.0953846	0.742433	-0.134803	0.892768
YBL001C	ECM15	protein_coding	II	Non-essential protein of unknown function; likely exists as tetramer, may be regulated by the binding of small-molecule ligands (possibly sulfate ions), may have a role in yeast cell-wall biogenesis	643.394	0.0513886	0.120695	0.425176	0.670708	0.818122
YBL002W	HTB2	protein_coding	II	Histone H2B; core histone protein required for chromatin assembly and chromosome function; nearly identical to HTB1; Rad6p-Bre1p-Lge1p mediated ubiquitination regulates reassembly after DNA replication, transcriptional activation, meiotic DSB formation and H3 methylation	2074.03	0.112246	0.0915047	1.22606	0.220175	0.420978
YBL003C	HTA2	protein_coding	II	Histone H2A; core histone protein required for chromatin assembly and chromosome function; one of two nearly identical (see also HTA1) subtypes; DNA damage-dependent phosphorylation by Mec1p facilitates DNA repair; acetylated by Nat4p	882.426	-0.215237	0.164104	-1.31199	0.189522	0.384882
YBL004W	UTP20	protein_coding	II	Component of the small-subunit (SSU) processome; SSU processome is involved in the biogenesis of the 18S rRNA	5991.47	-0.0419199	0.200832	-0.208719	0.834668	0.917139
YBL005W	PDR3	protein_coding	II	Transcriptional activator of the pleiotropic drug resistance network; regulates expression of ATP-binding cassette (ABC) transporters through binding to cis-acting PDRE sites (PDR responsive elements); post-translationally up-regulated in cells lacking functional mitochondrial genome; involved in diauxic shift; relative distribution to nucleus increases upon DNA replication stress; APCC(Cdh1) sub…	574.381	0.128113	0.150234	0.85464	0.392751	0.601354
YBL005W-B		protein_coding	II	Retrotransposon TYA Gag and TYB Pol genes; transcribed/translated as one unit; polyprotein is processed to make a nucleocapsid-like protein (Gag), reverse transcriptase (RT), protease (PR), and integrase (IN); similar to retroviral genes	523.918	0.472438	0.174964	2.69939	0.00694676	0.0421492
YBL006C	LDB7	protein_coding	II	Component of the RSC chromatin remodeling complex; interacts with Rsc3p, Rsc30p, Npl6p, and Htl1p to form a module important for a broad range of RSC functions	313.655	-0.326854	0.132797	-2.46141	0.0138392	0.0676291
YBL006W-A		protein_coding	II	Dubious open reading frame; unlikely to encode a functional protein, based on available experimental and comparative sequence data; completely overlaps the verified gene LDB7/YBL006C	3.12612	0.801755	0.731772	1.22235	0.221575
YBL007C	SLA1	protein_coding	II	Cytoskeletal protein binding protein; required for assembly of the cortical actin cytoskeleton; interacts with proteins regulating actin dynamics and proteins required for endocytosis; found in the nucleus and cell cortex; has 3 SH3 domains	3518.06	-0.111703	0.104602	-1.06787	0.285577	0.491872
YBL008W	HIR1	protein_coding	II	Subunit of the HIR complex; HIR is a nucleosome assembly complex involved in regulation of histone gene transcription; contributes to nucleosome formation, heterochromatic gene silencing, and formation of functional kinetochores	335.115	-0.163909	0.111603	-1.46907	0.141813	0.322741
YBL009W	ALK2	protein_coding	II	Protein kinase; along with its paralog, ALK1, required for proper spindle positioning and nuclear segregation following mitotic arrest, proper organization of cell polarity factors in mitosis, proper localization of formins and polarity factors, and survival in cells that activate spindle assembly checkpoint; phosphorylated in response to DNA damage; ALK2 has a paralog, ALK1, that arose from the …	245.799	-0.200053	0.140519	-1.42416	0.154399	0.339734
YBL010C		protein_coding	II	Putative protein of unknown function; green fluorescent protein (GFP)-fusion protein colocalizes with clathrin-coated vesicles	102.659	-0.119234	0.175697	-0.679284	0.496958	0.692688
YBL011W	SCT1	protein_coding	II	Glycerol 3-phosphate/dihydroxyacetone phosphate sn-1 acyltransferase; dual substrate-specific acyltransferase of the glycerolipid biosynthesis pathway; prefers 16-carbon fatty acids; similar to Gpt2p; gene is constitutively transcribed	1338.96	0.0205133	0.106201	0.193026	0.846938	0.92374
YBL012C		protein_coding	II	Dubious open reading frame; unlikely to encode a functional protein, based on available experimental and comparative sequence data	2.09252	-0.122427	0.749675	-0.144342	0.88523
YBL013W	FMT1	protein_coding	II	Methionyl-tRNA formyltransferase; catalyzes the formylation of initiator Met-tRNA in mitochondria; potential Cdc28p substrate	76.0552	0.00134021	0.21061	0.00400838	0.996802	0.998744
YBL014C	RRN6	protein_coding	II	Component of the core factor (CF) rDNA transcription factor complex; CF is required for transcription of 35S rRNA genes by RNA polymerase I and is composed of Rrn6p, Rrn7p, and Rrn11p	633.336	0.0397125	0.109306	0.363295	0.716384	0.848661
YBL015W	ACH1	protein_coding	II	Protein with CoA transferase activity; particularly for CoASH transfer from succinyl-CoA to acetate; has minor acetyl-CoA-hydrolase activity; phosphorylated; required for acetate utilization and for diploid pseudohyphal growth	522.953	0.161695	0.175821	0.91862	0.358295	0.567849
YBL016W	FUS3	protein_coding	II	Mitogen-activated serine/threonine protein kinase involved in mating; phosphoactivated by Ste7p; substrates include Ste12p, Far1p, Bni1p, Sst2p; inhibits invasive growth during mating by phosphorylating Tec1p, promoting its; inhibits recruitment of Ste5p, Cdc42p-mediated asymmetry and mating morphogenesis	386.423	-0.953866	0.196339	-4.85749	1.18881e-06	6.43624e-05
YBL017C	PEP1	protein_coding	II	Type I transmembrane sorting receptor for multiple vacuolar hydrolases; cycles between the late-Golgi and prevacuolar endosome-like compartments	3297.56	0.0987149	0.0575866	1.71424	0.0864838	0.230574
YBL018C	POP8	protein_coding	II	Subunit of both RNase MRP and nuclear RNase P; RNase MRP cleaves pre-rRNA, while nuclear RNase P cleaves tRNA precursors to generate mature 5' ends and facilitates turnover of nuclear RNAs; relocalizes to the cytosol in response to hypoxia	159.478	0.0274731	0.183602	0.148712	0.881781	0.940795
YBL019W	APN2	protein_coding	II	Class II abasic (AP) endonuclease involved in repair of DNA damage; homolog of human HAP1 and E. coli exoIII	176.29	0.523434	0.174205	3.00252	0.00267756	0.0212763
YBL020W	RFT1	protein_coding	II	Membrane protein required for translocation of Man5GlcNac2-PP-Dol; required for translocation of Man5GlcNac2-PP-Dol from the cytoplasmic side to the lumenal side of the ER membrane but is not the flippase; mutation is suppressed by expression of human p53 protein; essential gene	558.876	-0.39879	0.115394	-3.4561	0.000548048	0.00698402
YBL021C	HAP3	protein_coding	II	Subunit of the Hap2p/3p/4p/5p CCAAT-binding complex; complex is heme-activated and glucose-repressed; complex is a transcriptional activator and global regulator of respiratory gene expression; contains sequences contributing to both complex assembly and DNA binding	90.45	-0.232259	0.207209	-1.12114	0.26223	0.466325
YBL022C	PIM1	protein_coding	II	ATP-dependent Lon protease; involved in degradation of misfolded proteins in mitochondria; required for biogenesis and maintenance of mitochondria	2200.33	-0.245169	0.1058	-2.3173	0.0204875	0.0889231
YBL023C	MCM2	protein_coding	II	Protein involved in DNA replication; component of the Mcm2-7 hexameric helicase complex that binds chromatin as a part of the pre-replicative complex; relative distribution to the nucleus increases upon DNA replication stress	463.825	-0.688675	0.133714	-5.15016	2.60271e-07	1.88988e-05
YBL024W	NCL1	protein_coding	II	S-adenosyl-L-methionine-dependent tRNA: m5C-methyltransferase; methylates cytosine to m5C at several positions in tRNAs and intron-containing pre-tRNAs; increases proportion of tRNALeu(CAA) with m5C at wobble position in response to hydrogen peroxide, causing selective translation of mRNA from genes enriched in TTG codon; loss of NCL1 confers hypersensitivity to oxidative stress; similar to Nop2p…	1660.36	-0.164592	0.191464	-0.859601	0.390009	0.600082
YBL025W	RRN10	protein_coding	II	Protein involved in promoting high level transcription of rDNA; subunit of UAF (upstream activation factor) for RNA polymerase I	66.043	0.336487	0.238483	1.40946	0.1587	0.345373
YBL026W	LSM2	protein_coding	II	Lsm (Like Sm) protein; part of heteroheptameric complexes (Lsm2p-7p and either Lsm1p or 8p): cytoplasmic Lsm1p complex involved in mRNA decay; nuclear Lsm8p complex part of U6 snRNP and possibly involved in processing tRNA, snoRNA, and rRNA; relocalizes from nucleus to cytoplasmic foci upon DNA replication stress	515.998	0.0296806	0.136822	0.216949	0.828248	0.914611
YBL027W	RPL19B	protein_coding	II	Ribosomal 60S subunit protein L19B; rpl19a and rpl19b single null mutations result in slow growth, while the double null mutation is lethal; homologous to mammalian ribosomal protein L19, no bacterial homolog; RPL19B has a paralog, RPL19A, that arose from the whole genome duplication	6316.92	-0.420994	0.199465	-2.1101	0.0348496	0.126524
YBL028C		protein_coding	II	Protein of unknown function that may interact with ribosomes; green fluorescent protein (GFP)-fusion protein localizes to the nucleolus; predicted to be involved in ribosome biogenesis	371.301	-0.277704	0.203204	-1.36652	0.171776	0.363706
YBL029C-A		protein_coding	II	Protein of unknown function; green fluorescent protein (GFP)-fusion protein localizes to the cell periphery; protein abundance increases in response to DNA replication stress; has potential orthologs in Saccharomyces species and in Yarrowia lipolytica	145.722	0.107952	0.253925	0.424869	0.670932	0.818122
YBL029W		protein_coding	II	Non-essential protein of unknown function	65.6772	-0.457707	0.360506	-1.26762	0.204932	0.40295
YBL030C	PET9	protein_coding	II	Major ADP/ATP carrier of the mitochondrial inner membrane; exchanges cytosolic ADP for mitochondrially synthesized ATP; also imports heme and ATP; phosphorylated; required for viability in many lab strains that carry a sal1 mutation; PET9 has a paralog, AAC3, that arose from the whole genome duplication	1666.13	-0.460985	0.161401	-2.856	0.00429015	0.0300554
YBL031W	SHE1	protein_coding	II	Mitotic spindle protein; interacts with components of the Dam1 (DASH) complex, its effector Sli15p, and microtubule-associated protein Bim1p; also localizes to nuclear microtubules and to the bud neck in a ring-shaped structure; inhibits dynein function	114.889	-0.37172	0.161837	-2.29752	0.0215892	0.0918957
YBL032W	HEK2	protein_coding	II	RNA binding protein involved in asymmetric localization of ASH1 mRNA; represses translation of ASH1 mRNA, an effect reversed by Yck1p-dependent phosphoryation; regulates telomere position effect and length; similarity to hnRNP-K	613.966	-0.418346	0.149308	-2.8014	0.00508811	0.0339868
YBL033C	RIB1	protein_coding	II	GTP cyclohydrolase II; catalyzes the first step of the riboflavin biosynthesis pathway	609.089	0.0900349	0.20671	0.436389	0.662554	0.813626
YBL034C	STU1	protein_coding	II	Component of the mitotic spindle; binds to interpolar microtubules via its association with beta-tubulin (Tub2p); required for interpolar microtubules to provide an outward force on the spindle poles	641.513	-0.148878	0.0958211	-1.55365	0.120267	0.287957
YBL035C	POL12	protein_coding	II	B subunit of DNA polymerase alpha-primase complex; required for initiation of DNA replication during mitotic and premeiotic DNA synthesis; also functions in telomere capping and length regulation	364.003	-0.289213	0.13627	-2.1224	0.033804	0.124336
YBL036C		protein_coding	II	Putative non-specific single-domain racemase; based on structural similarity; binds pyridoxal 5'-phosphate; expression of GFP-fusion protein induced in response to the DNA-damaging agent MMS	307.958	-0.0677856	0.132888	-0.510445	0.609739	0.775781
YBL037W	APL3	protein_coding	II	Alpha-adaptin; large subunit of the clathrin associated protein complex (AP-2); involved in vesicle mediated transport	721.558	-0.245427	0.114806	-2.13753	0.0325549	0.120896
YBL038W	MRPL16	protein_coding	II	Mitochondrial ribosomal protein of the large subunit; homologous to bacterial L16 ribosomal protein; synthetically lethal with hac1 mutant suggesting a role in the maturation of secretory proteins	549.105	0.0216708	0.114508	0.190107	0.849226	0.924615
YBL039C	URA7	protein_coding	II	Major CTP synthase isozyme (see also URA8); catalyzes the ATP-dependent transfer of the amide nitrogen from glutamine to UTP, forming CTP, the final step in de novo biosynthesis of pyrimidines; involved in phospholipid biosynthesis; capable of forming cytoplasmic filaments termed cytoophidium, especially during conditions of glucose depletion; URA7 has a paralog, URA8, that arose from the whole g…	2365.72	-0.305682	0.235639	-1.29673	0.194723	0.391976
YBL039W-B		protein_coding	II	Putative protein of unknown function	69.2185	0.16943	0.239819	0.711314	0.47689	0.67792
YBL040C	ERD2	protein_coding	II	HDEL receptor; an integral membrane protein that binds to the HDEL motif in proteins destined for retention in the endoplasmic reticulum; has a role in maintenance of normal levels of ER-resident proteins	608.021	-0.0603077	0.15666	-0.385077	0.70018	0.837781
YBL041W	PRE7	protein_coding	II	Beta 6 subunit of the 20S proteasome	887.042	-0.120221	0.149213	-0.805741	0.420392	0.627603
YBL042C	FUI1	protein_coding	II	High affinity uridine permease, localizes to the plasma membrane; also mediates low but significant transport of the cytotoxic nucleoside analog 5-fluorouridine; not involved in uracil transport; relative distribution to the vacuole increases upon DNA replication stress	842.093	-0.206117	0.276904	-0.744152	0.456784	0.661646
YBL043W	ECM13	protein_coding	II	Non-essential protein of unknown function; induced by treatment with 8-methoxypsoralen and UVA irradiation; ECM13 has a paralog, YJR115W, that arose from the whole genome duplication	295.129	-0.214188	0.41732	-0.511524	0.608984	0.775299
YBL044W		protein_coding	II	Putative protein of unknown function; YBL044W is not an essential protein	3.86375	-0.0113702	0.716853	-0.0201845	0.983896	0.993493
YBL045C	COR1	protein_coding	II	Core subunit of the ubiquinol-cytochrome c reductase complex; the ubiquinol-cytochrome c reductase complex (bc1 complex) is a component of the mitochondrial inner membrane electron transport chain	1628.26	-0.161565	0.227474	-0.710212	0.477572	0.67828
YBL046W	PSY4	protein_coding	II	Regulatory subunit of protein phosphatase PP4; presence of Psy4p in the PP4 complex (along with catalytic subunit Pph3p and Psy2p) is required for dephosphorylation of the histone variant H2AX, but not for dephosphorylation of Rad53p, during recovery from the DNA damage checkpoint; localization is cell-cycle dependent and regulated by Cdc28p phosphorylation; required for cisplatin resistance; hom…	135.857	-0.247954	0.172274	-1.43919	0.150095	0.334195
YBL047C	EDE1	protein_coding	II	Putative regulator of cytokinesis; also involved in endocytosis and has a network of interactions with other endocytic proteins; binds membranes in a ubiquitin-dependent manner; may also bind ubiquitinated membrane-associated proteins; interacts with Cmk2 and functions upstream of CMK2 in regulating non-apoptotic cell death	4002.43	0.111513	0.10757	1.03673	0.299861	0.50747
YBL048W	RRT1	protein_coding	II	Protein of unknown function; identified in a screen for mutants with increased levels of rDNA transcription; dubious open reading frame unlikely to encode a protein, based on experimental and comparative sequence data	65.8865	1.14214	0.417355	2.77788	0.00547153	0.0358115
YBL049W	MOH1	protein_coding	II	Protein of unknown function; has homology to kinase Snf7p; not required for growth on nonfermentable carbon sources; essential for survival in stationary phase; possibly linked with vacuolar transport	113.836	1.16595	0.372687	3.14888	0.00163898	0.0152346
YBL050W	SEC17	protein_coding	II	Alpha-SNAP cochaperone; SNARE-complex adaptor for Sec18 (NSF) during the disassembly of postfusion cis-SNARE complexes; stimulates the ATPase activity of Sec18p; peripheral membrane protein required for vesicular transport between ER and Golgi, the 'priming' step in homotypic vacuole fusion, and autophagy; similar to mammalian alpha-SNAP	618.788	-0.16347	0.119591	-1.3669	0.171658	0.363581
YBL051C	PIN4	protein_coding	II	Protein involved in G2/M phase progression and response to DNA damage; interacts with Rad53p; contains an RNA recognition motif, a nuclear localization signal, and several SQ/TQ cluster domains; hyperphosphorylated in response to DNA damage	678.243	-0.104106	0.137177	-0.75884	0.447948	0.651753
YBL052C	SAS3	protein_coding	II	Histone acetyltransferase catalytic subunit of NuA3 complex; acetylates histone H3, involved in transcriptional silencing; homolog of the mammalian MOZ proto-oncogene; mutant has aneuploidy tolerance; sas3gcn5 double mutation is lethal	466.775	-0.0367282	0.0969833	-0.379239	0.70451	0.841052
YBL053W		protein_coding	II	Dubious open reading frame; unlikely to encode a functional protein, based on available experimental and comparative sequence data	8.88866	-0.403156	0.607268	-0.660892	0.508682	0.70241
YBL054W	TOD6	protein_coding	II	PAC motif binding protein involved in rRNA and ribosome biogenesis; subunit of the RPD3L histone deacetylase complex; Myb-like HTH transcription factor; hypophosphorylated by rapamycin treatment in a Sch9p-dependent manner; activated in stochastic pulses of nuclear localization	427.198	0.231121	0.208739	1.10729	0.268169	0.472492
YBL055C		protein_coding	II	3'-->5' exonuclease and endonuclease with a possible role in apoptosis; has similarity to mammalian and C. elegans apoptotic nucleases	494.868	-0.0120196	0.131433	-0.0916675	0.926962	0.965524
YBL056W	PTC3	protein_coding	II	Type 2C protein phosphatase (PP2C); dephosphorylates Hog1p (see also Ptc2p) to limit maximal kinase activity induced by osmotic stress; dephosphorylates T169 phosphorylated Cdc28p (see also Ptc2p); role in DNA damage checkpoint inactivation; PTC3 has a paralog, PTC2, that arose from the whole genome duplication	1389.39	-0.166457	0.100076	-1.66339	0.0962345	0.247885
YBL057C	PTH2	protein_coding	II	One of two mitochondrially-localized peptidyl-tRNA hydrolases; negatively regulates the ubiquitin-proteasome pathway via interactions with ubiquitin-like ubiquitin-associated proteins; dispensable for cell growth; see also PTH1	379.773	0.114285	0.124591	0.917001	0.359142	0.568511
YBL058W	SHP1	protein_coding	II	UBX (ubiquitin regulatory X) domain-containing protein; regulates Glc7p phosphatase activity; shp1 mutants are impaired in growth and mitotic progression; functions in growth and mitotic progression require Cdc48p binding; mitotic phenotype is caused by reduced Glc7p activity; interacts with ubiquitylated proteins, required for degradation of a ubiquitylated model substrate	973.128	-0.294315	0.0969757	-3.03494	0.00240582	0.0199312
YBL059C-A	CMC2	protein_coding	II	Protein involved in respiratory chain complex assembly or maintenance; protein of the mitochondrial intermembrane space; contains twin Cx9C motifs that can form coiled coil-helix-coiled-coil helix fold	115.741	-0.28667	0.195728	-1.46525	0.142852	0.323976
YBL059W		protein_coding	II	Putative protein of unknown function; the authentic, non-tagged protein is detected in highly purified mitochondria in high-throughput studies; YBL059W has a paralog, YER093C-A, that arose from the whole genome duplication	66.9088	-0.144242	0.199463	-0.724664	0.468658	0.670349
YBL060W	YEL1	protein_coding	II	Guanine nucleotide exchange factor specific for Arf3p; localized to the bud neck and tip; required for localization of Arf3p to the bud neck and tip	212.176	0.337566	0.149316	2.26218	0.0236865	0.0978536
YBL061C	SKT5	protein_coding	II	Activator of Chs3p (chitin synthase III) during vegetative growth; recruits Chs3p to the bud neck via interaction with Bni4p; SKT5 has a paralog, SHC1, that arose from the whole genome duplication	760.888	-0.160834	0.118883	-1.35245	0.17623	0.368997
YBL062W		protein_coding	II	Dubious open reading frame; unlikely to encode a functional protein, based on available experimental and comparative sequence data	5.33011	0.387835	0.6762	0.609401	0.542259	0.730599
YBL063W	KIP1	protein_coding	II	Kinesin-related motor protein; required for mitotic spindle assembly, chromosome segregation, and 2 micron plasmid partitioning; functionally redundant with Cin8p for chromosomal but not plasmid functions	220.063	-0.530966	0.197574	-2.68668	0.00721664	0.0430349
YBL064C	PRX1	protein_coding	II	Mitochondrial peroxiredoxin with thioredoxin peroxidase activity; has a role in reduction of hydroperoxides; reactivation requires Trr2p and glutathione; induced during respiratory growth and oxidative stress; phosphorylated; protein abundance increases in response to DNA replication stress	640.099	0.378701	0.197428	1.91785	0.0551294	0.172458
YBL065W		protein_coding	II	Dubious open reading frame; unlikely to encode a functional protein, based on available experimental and comparative sequence data; partially overlaps verified ORF SEF1/YBL066C; YBL065W is a non-essential gene	4.31719	0.165149	0.742802	0.32912	0.742065	0.867265
YBL066C	SEF1	protein_coding	II	Putative transcription factor; has homolog in Kluyveromyces lactis	456.721	0.271031	0.128906	2.1052	0.0352742	0.127198
YBL067C	UBP13	protein_coding	II	Ubiquitin-specific protease that cleaves Ub-protein fusions; UBP13 has a paralog, UBP9, that arose from the whole genome duplication	677.905	-0.225873	0.107812	-2.09529	0.0361455	0.129253
YBL068W	PRS4	protein_coding	II	5-phospho-ribosyl-1(alpha)-pyrophosphate synthetase, synthesizes PRPP; which is required for nucleotide, histidine, and tryptophan biosynthesis; one of five related enzymes, which are active as heteromultimeric complexes; PRS4 has a paralog, PRS2, that arose from the whole genome duplication; a missense mutation in the conserved residue R196 of its human homolog PRPS1 is pathogenic	370.531	-0.1275	0.122057	-1.04509	0.295981	0.503111
YBL069W	AST1	protein_coding	II	Lipid raft associated protein; interacts with the plasma membrane ATPase Pma1p and has a role in its targeting to the plasma membrane by influencing its incorporation into lipid rafts; sometimes classified in the medium-chain dehydrogenase/reductases (MDRs) superfamily; AST1 has a paralog, AST2, that arose from the whole genome duplication	407.762	0.181366	0.174189	1.04121	0.297779	0.505055
YBL071C		protein_coding	II	Dubious open reading frame; unlikely to encode a functional protein, based on available experimental and comparative sequence data	3.02608	0.509819	0.735254	0.750323	0.45306
YBL071C-B		protein_coding	II	Putative protein of unknown function; identified by gene-trapping, microarray-based expression analysis, and genome-wide homology searching	3.13177	0.650441	0.714452	1.00087	0.316891
YBL071W-A	KTI11	protein_coding	II	Zn-ribbon protein that co-purifies with Dph1 and Dph2; in a complex required for synthesis of diphthamide on translation factor eEF2 and with Elongator subunits Iki3p, Elp2p, and Elp3p; involved in modification of wobble nucleosides in tRNAs	126.612	0.134473	0.197447	0.684968	0.493364	0.690202
YBL072C	RPS8A	protein_coding	II	Protein component of the small (40S) ribosomal subunit; homologous to mammalian ribosomal protein S8, no bacterial homolog; RPS8A has a paralog, RPS8B, that arose from the whole genome duplication	2105.24	-0.541186	0.209046	-2.58803	0.00965279	0.0529029
YBL074C	AAR2	protein_coding	II	Component of the U5 snRNP complex; required for splicing of U3 precursors; originally described as a splicing factor specifically required for splicing pre-mRNA of the MATa1 cistron	147.502	0.301855	0.190745	1.58467	0.113042	0.276095
YBL075C	SSA3	protein_coding	II	ATPase involved in protein folding and the response to stress; plays a role in SRP-dependent cotranslational protein-membrane targeting and translocation; member of the heat shock protein 70 (HSP70) family; localized to the cytoplasm; SSA3 has a paralog, SSA4, that arose from the whole genome duplication	318.052	0.170674	0.13016	1.3135	0.189015	0.384302
YBL076C	ILS1	protein_coding	II	Cytoplasmic isoleucine-tRNA synthetase; target of the G1-specific inhibitor reveromycin A	12237.2	-0.335262	0.107933	-3.1062	0.00189509	0.0171252
YBL078C	ATG8	protein_coding	II	Component of autophagosomes and Cvt vesicles; regulator of Atg1p, targets it to autophagosomes; binds the Atg1p-Atg13p complex, triggering its vacuolar degradation; unique ubiquitin-like protein whose conjugation target is lipid phosphatidylethanolamine (PE); Atg8p-PE is anchored to membranes, is involved in phagophore expansion, and may mediate membrane fusion during autophagosome formation; dec…	161.904	0.549202	0.276896	1.99021	0.0465677	0.154276
YBL079W	NUP170	protein_coding	II	Subunit of the inner ring of the nuclear pore complex (NPC); contributes to NPC assembly and nucleocytoplasmic transport; both Nup170p and NUP157p are similar to human Nup155p; NUP170 has a paralog, NUP157, that arose from the whole genome duplication	2511.85	0.109237	0.102194	1.06896	0.285088	0.491361
YBL080C	PET112	protein_coding	II	Subunit of the trimeric GatFAB AmidoTransferase(AdT) complex; involved in the formation of Q-tRNAQ; mutation is functionally complemented by the bacterial GatB ortholog	146.013	-0.195028	0.191863	-1.01778	0.308783	0.51587
YBL081W		protein_coding	II	Non-essential protein of unknown function; null mutation results in a decrease in plasma membrane electron transport	114.731	-0.105762	0.241652	-0.434875	0.663653	0.813842
YBL082C	ALG3	protein_coding	II	Dolichol-P-Man dependent alpha(1-3) mannosyltransferase; involved in the synthesis of dolichol-linked oligosaccharide donor for N-linked glycosylation of proteins	150.856	-0.074412	0.133617	-0.560012	0.575472	0.752184
YBL083C		protein_coding	II	Dubious open reading frame; unlikely to encode a functional protein, based on available experimental and comparative sequence data; overlaps verified ORF ALG3	11.8845	0.131853	0.384989	0.319599	0.749272	0.872713
YBL084C	CDC27	protein_coding	II	Subunit of the Anaphase-Promoting Complex/Cyclosome (APC/C); APC/C is a ubiquitin-protein ligase required for degradation of anaphase inhibitors, including mitotic cyclins, during the metaphase/anaphase transition	334.254	0.200874	0.12148	1.65627	0.0976669	0.250749
YBL085W	BOI1	protein_coding	II	Protein implicated in polar growth; functionally redundant with Boi2p; interacts with bud-emergence protein Bem1p; contains an SH3 (src homology 3) domain and a PH (pleckstrin homology) domain; relocalizes from bud neck to cytoplasm upon DNA replication stress; BOI1 has a paralog, BOI2, that arose from the whole genome duplication	785.096	-0.148641	0.115075	-1.29174	0.196446	0.393402
YBL086C		protein_coding	II	Protein of unknown function; green fluorescent protein (GFP)-fusion protein localizes to the cell periphery	203.885	0.0130372	0.191282	0.0680484	0.945747	0.976172
YBL087C	RPL23A	protein_coding	II	Ribosomal 60S subunit protein L23A; homologous to mammalian ribosomal protein L23 and bacterial L14; RPL23A has a paralog, RPL23B, that arose from the whole genome duplication	2211.36	-0.595631	0.22156	-2.68737	0.00720168	0.0430349
YBL088C	TEL1	protein_coding	II	Protein kinase primarily involved in telomere length regulation; contributes to cell cycle checkpoint control in response to DNA damage; acts with Red1p and Mec1p to promote interhomolog recombination by phosphorylation of Hop1; functionally redundant with Mec1p; regulates P-body formation induced by replication stress; homolog of human ataxia-telangiectasia mutated (ATM) gene, the gene responsib…	1382.27	0.414983	0.104009	3.98984	6.6119e-05	0.00146268
YBL089W	AVT5	protein_coding	II	Putative transporter; member of a family of seven S. cerevisiae genes (AVT1-7) related to vesicular GABA-glycine transporters; AVT5 has a paralog, AVT6, that arose from the whole genome duplication	187.922	0.172599	0.158841	1.08533	0.277777	0.483117
YBL090W	MRP21	protein_coding	II	Mitochondrial ribosomal protein of the small subunit; MRP21 exhibits genetic interactions with mutations in the COX2 and COX3 mRNA 5'-untranslated leader sequences	284.337	-0.492917	0.17028	-2.89484	0.00379349	0.0274162
YBL091C	MAP2	protein_coding	II	Methionine aminopeptidase; catalyzes the cotranslational removal of N-terminal methionine from nascent polypeptides; function is partially redundant with that of Map1p	808.232	-0.164539	0.0765715	-2.14897	0.031637	0.118701
YBL091C-A	SCS22	protein_coding	II	Protein involved in regulation of phospholipid metabolism; one of 6 proteins (Ist2p, Scs2p, Scs22p, Tcb1p, Tcb2p, Tcb3p) that connect ER to the plasma membrane (PM) and regulate PM phosphatidylinositol-4-phosphate (PI4P) levels by controlling access of Sac1p phosphatase to its substrate PI4P in the PM; similar to D. melanogaster inturned protein; SCS22 has a paralog, SCS2, that arose from the who…	104.988	0.0284526	0.168425	0.166553	0.867722	0.934493
YBL092W	RPL32	protein_coding	II	Ribosomal 60S subunit protein L32; overexpression disrupts telomeric silencing; homologous to mammalian ribosomal protein L32, no bacterial homolog	7983.82	-0.492037	0.186945	-2.63151	0.0085006	0.0485568
YBL093C	ROX3	protein_coding	II	Subunit of the RNA polymerase II mediator complex; associates with core polymerase subunits to form the RNA polymerase II holoenzyme	560.049	0.461086	0.124777	3.69584	0.00021916	0.00358795
YBL094C		protein_coding	II	Dubious open reading frame; unlikely to encode a functional protein, based on available experimental and comparative sequence data; partially overlaps uncharacterized ORF YBL095W	10.129	0.230938	0.508352	0.465134	0.641835	0.79851
YBL095W		protein_coding	II	Putative protein of unknown function; the authentic, non-tagged protein is detected in highly purified mitochondria in high-throughput studies	217.467	-0.139761	0.187888	-0.743035	0.45746	0.662004
YBL096C		protein_coding	II	Non-essential protein of unknown function	4.10375	0.83711	0.656575	1.27445	0.202506	0.400085
YBL097W	BRN1	protein_coding	II	Subunit of the condensin complex; required for chromosome condensation and for clustering of tRNA genes at the nucleolus; may influence multiple aspects of chromosome transmission	129.398	0.203819	0.243169	0.839958	0.400932	0.609046
YBL098W	BNA4	protein_coding	II	Kynurenine 3-mono oxygenase; required for the de novo biosynthesis of NAD from tryptophan via kynurenine; expression regulated by Hst1p; putative therapeutic target for Huntington disease	168.854	-0.580058	0.290886	-1.99355	0.0462009	0.153742
YBL099W	ATP1	protein_coding	II	Alpha subunit of the F1 sector of mitochondrial F1F0 ATP synthase; which is a large, evolutionarily conserved enzyme complex required for ATP synthesis; F1 translationally regulates ATP6 and ATP8 expression to achieve a balanced output of ATP synthase genes encoded in nucleus and mitochondria; phosphorylated; N-terminally propionylated in vivo	5358.46	-0.16072	0.174561	-0.920699	0.357207	0.56632
YBL100W-B		protein_coding	II	Retrotransposon TYA Gag and TYB Pol genes; transcribed/translated as one unit; polyprotein is processed to make a nucleocapsid-like protein (Gag), reverse transcriptase (RT), protease (PR), and integrase (IN); similar to retroviral genes	87.587	-0.347065	0.265233	-1.30796	0.190885	0.38615
YBL101C	ECM21	protein_coding	II	Protein involved in regulating endocytosis of plasma membrane proteins; identified as a substrate for ubiquitination by Rsp5p and deubiquitination by Ubp2p; promoter contains several Gcn4p binding elements; ECM21 has a paralog, CSR2, that arose from the whole genome duplication	800.979	-0.102548	0.200112	-0.511886	0.608731	0.775297
YBL102W	SFT2	protein_coding	II	Tetra-spanning membrane protein found mostly in the late Golgi; non-essential; can suppress some sed5 alleles; may be part of the transport machinery, but precise function is unknown; similar to mammalian syntaxin 5	607.629	0.275573	0.180787	1.52432	0.127428	0.301221
YBL103C	RTG3	protein_coding	II	bHLH/Zip transcription factor for retrograde (RTG) and TOR pathways; forms a complex with another bHLH/Zip protein, Rtg1p, to activate the pathways; target of Hog1p	686.213	0.537832	0.310046	1.7368	0.0824224	0.223021
YBL104C	SEA4	protein_coding	II	Subunit of the SEA (Seh1-associated) complex; SEA is a coatomer-related complex that associates dynamically with the vacuole; has an N-terminal beta-propeller fold and a C-terminal RING motif; promoter contains multiple GCN4 binding sites	557.948	0.261022	0.0940007	2.77619	0.00549995	0.0359594
YBL105C	PKC1	protein_coding	II	Protein serine/threonine kinase; essential for cell wall remodeling during growth; localized to sites of polarized growth and the mother-daughter bud neck; homolog of the alpha, beta, and gamma isoforms of mammalian protein kinase C (PKC)	1262.02	0.162572	0.100843	1.61268	0.106815	0.266251
YBL106C	SRO77	protein_coding	II	Protein with roles in exocytosis and cation homeostasis; functions in docking and fusion of post-Golgi vesicles with plasma membrane; regulates cell proliferation and colony development via the Rho1-Tor1 pathway; interacts with SNARE protein Sec9p; homolog of Drosophila lethal giant larvae tumor suppressor; SRO77 has a paralog, SRO7, that arose from the whole genome duplication	316.982	-0.15983	0.194818	-0.820333	0.412026	0.619431
YBL107C	MIX23	protein_coding	II	Mitochondrial intermembrane space protein of unknown function; imported via the MIA import machinery; contains an unusual twin cysteine motif (CX13C CX14C)	94.2807	-0.67404	0.220896	-3.04965	0.00229108	0.0192127
YBL113C		protein_coding	II	Helicase-like protein encoded within the telomeric Y' element	20.617	-0.384473	0.445571	-0.858454	0.390642	0.600323
YBR001C	NTH2	protein_coding	II	Putative neutral trehalase, required for thermotolerance; may mediate resistance to other cellular stresses; NTH2 has a paralog, NTH1, that arose from the whole genome duplication	681.932	-0.486643	0.18331	-2.65421	0.00794934	0.0464175
YBR002C	RER2	protein_coding	II	Cis-prenyltransferase involved in dolichol synthesis; major enzyme of polyprenol synthesis in both the endoplasmic reticulum (ER) and in lipid droplets; participates in ER protein sorting	269.072	-0.275165	0.119466	-2.30349	0.0212511	0.0909582
YBR003W	COQ1	protein_coding	II	Hexaprenyl pyrophosphate synthetase; catalyzes the first step in ubiquinone (coenzyme Q) biosynthesis	508.15	-0.190804	0.112002	-1.70361	0.0884537	0.233406
YBR004C	GPI18	protein_coding	II	Functional ortholog of human PIG-V; PIG-V is a mannosyltransferase that transfers the second mannose in glycosylphosphatidylinositol biosynthesis; the authentic, non-tagged protein was localized to mitochondria	612.506	0.687979	0.140223	4.90617	9.28727e-07	5.18272e-05
YBR005W	RCR1	protein_coding	II	Protein of the ER membrane involved in cell wall chitin deposition; may function in the endosomal-vacuolar trafficking pathway, helping determine whether plasma membrane proteins are degraded or routed to the plasma membrane; RCR1 has a paralog, RCR2, that arose from the whole genome duplication	288.589	0.695373	0.204933	3.39409	0.00068857	0.00823382
YBR006W	UGA2	protein_coding	II	Succinate semialdehyde dehydrogenase; involved in the utilization of gamma-aminobutyrate (GABA) as a nitrogen source; part of the 4-aminobutyrate and glutamate degradation pathways; localized to the cytoplasm	538.128	0.797812	0.314661	2.53504	0.0112435	0.0587592
YBR007C	DSF2	protein_coding	II	Deletion suppressor of mpt5 mutation; relocalizes from bud neck to cytoplasm upon DNA replication stress	495.523	0.876477	0.179794	4.87532	1.08632e-06	5.9334e-05
YBR008C	FLR1	protein_coding	II	Plasma membrane transporter of the major facilitator superfamily; member of the 12-spanner drug:H(+) antiporter DHA1 family; involved in efflux of fluconazole, diazaborine, benomyl, methotrexate, and other drugs; expression induced in cells treated with the mycotoxin patulin; relocalizes from nucleus to plasma membrane upon DNA replication stress	239.244	0.297543	0.257612	1.15533	0.247956	0.452103
YBR009C	HHF1	protein_coding	II	Histone H4; core histone protein required for chromatin assembly and chromosome function; one of two identical histone proteins (see also HHF2); contributes to telomeric silencing; N-terminal domain involved in maintaining genomic integrity	1614.05	0.223859	0.12345	1.81291	0.0698461	0.202295
YBR010W	HHT1	protein_coding	II	Histone H3; core histone protein required for chromatin assembly, part of heterochromatin-mediated telomeric and HM silencing; one of two identical histone H3 proteins (see HHT2); regulated by acetylation, methylation, and phosphorylation; H3K14 acetylation plays an important role in the unfolding of strongly positioned nucleosomes during repair of UV damage	2030.77	0.121955	0.140585	0.867168	0.38585	0.596112
YBR011C	IPP1	protein_coding	II	Cytoplasmic inorganic pyrophosphatase (PPase); homodimer that catalyzes the rapid exchange of oxygens from Pi with water, highly expressed and essential for viability, active-site residues show identity to those from E. coli PPase	6107.55	-0.119708	0.178075	-0.672196	0.501459	0.696602
YBR012C		protein_coding	II	Dubious open reading frame; unlikely to encode a functional protein, based on available experimental and comparative sequence data; expression induced by iron-regulated transcriptional activator Aft2p	82.5794	1.71214	0.421658	4.05159	5.08712e-05	0.00122647
YBR012W-B		protein_coding	II	Retrotransposon TYA Gag and TYB Pol genes; transcribed/translated as one unit; polyprotein is processed to make a nucleocapsid-like protein (Gag), reverse transcriptase (RT), protease (PR), and integrase (IN); similar to retroviral genes	113.318	1.30522	0.285289	4.56579	4.97607e-06	0.000200639
YBR013C		protein_coding	II	Putative protein of unknown function; haploid deletion mutant exhibits synthetic phenotype with alpha-synuclein	70.3224	0.0178889	0.206201	0.0851814	0.932117	0.96722
YBR014C	GRX7	protein_coding	II	Cis-golgi localized monothiol glutaredoxin; more similar in activity to dithiol than other monothiol glutaredoxins; involved in the oxidative stress response; does not bind metal ions; GRX7 has a paralog, GRX6, that arose from the whole genome duplication	253.656	0.0149057	0.129348	0.114407	0.908915	0.956655
YBR015C	MNN2	protein_coding	II	Alpha-1,2-mannosyltransferase; responsible for addition of the first alpha-1,2-linked mannose to form the branches on the mannan backbone of oligosaccharides, localizes to an early Golgi compartment	1367.26	-0.209998	0.0960358	-2.18674	0.0287618	0.111858
YBR016W		protein_coding	II	Tail-anchored plasma membrane protein with a conserved CYSTM module; predicted to be palmitoylated; has similarity to hydrophilins, which are involved in the adaptive response to hyperosmotic conditions; YBR016W has a paralog, YDL012C, that arose from the whole genome duplication	171.307	-0.357384	0.217856	-1.64042	0.100917	0.255586
YBR017C	KAP104	protein_coding	II	Transportin or cytosolic karyopherin beta 2; functions in the rg-nuclear localization signal-mediated nuclear import/reimport of mRNA-binding proteins Nab2p and Hrp1p; regulates asymmetric protein synthesis in daughter cells during mitosis	1410.59	-0.078763	0.171334	-0.459715	0.645721	0.801406
YBR018C	GAL7	protein_coding	II	Galactose-1-phosphate uridyl transferase; synthesizes glucose-1-phosphate and UDP-galactose from UDP-D-glucose and alpha-D-galactose-1-phosphate in the second step of galactose catabolism	22.3223	0.806092	0.421986	1.91022	0.0561051	0.174713
YBR019C	GAL10	protein_coding	II	UDP-glucose-4-epimerase; catalyzes the interconversion of UDP-galactose and UDP-D-glucose in galactose metabolism; also catalyzes the conversion of alpha-D-glucose or alpha-D-galactose to their beta-anomers	29.955	1.62588	0.417808	3.84363	0.000121226	0.00231962
YBR020W	GAL1	protein_coding	II	Galactokinase; phosphorylates alpha-D-galactose to alpha-D-galactose-1-phosphate in the first step of galactose catabolism; expression regulated by Gal4p; GAL1 has a paralog, GAL3, that arose from the whole genome duplication	61.2987	1.54226	0.288109	5.32152	1.02905e-07	9.20481e-06
YBR021W	FUR4	protein_coding	II	Plasma membrane localized uracil permease; expression is tightly regulated by uracil levels and environmental cues; conformational alterations induced by unfolding or substrate binding result in Rsp5p-mediated ubiquitination and degradation	153.523	-0.531336	0.271141	-1.96106	0.0498726	0.16099
YBR022W	POA1	protein_coding	II	Phosphatase that is highly specific for ADP-ribose 1''-phosphate; a tRNA splicing metabolite; may have a role in regulation of tRNA splicing	140.253	-0.0846548	0.182509	-0.465241	0.641759	0.79851
YBR023C	CHS3	protein_coding	II	Chitin synthase III; catalyzes the transfer of N-acetylglucosamine (GlcNAc) to chitin; required for synthesis of the majority of cell wall chitin, the chitin ring during bud emergence, and spore wall chitosan; contains overlapping di-leucine and di-acidic signals that mediate, respectively, intracellular trafficking by AP-1 and trafficking to plasma membrane by exomer complex; requires AP-3 compl…	1609.79	-0.301651	0.122148	-2.46962	0.0135258	0.0663074
YBR024W	SCO2	protein_coding	II	Protein anchored to mitochondrial inner membrane; may have a redundant function with Sco1p in delivery of copper to cytochrome c oxidase; interacts with Cox2p; SCO2 has a paralog, SCO1, that arose from the whole genome duplication	161.197	0.0502326	0.162161	0.309782	0.756727	0.877207
YBR025C	OLA1	protein_coding	II	P-loop ATPase with similarity to human OLA1 and bacterial YchF; identified as specifically interacting with the proteasome; null mutant displays increased translation rate and increased readthrough of premature stop codons; protein abundance increases in response to hydrogen peroxide and to DNA replication stress	3319.04	-0.602775	0.186866	-3.22529	0.00125847	0.0128252
YBR026C	ETR1	protein_coding	II	2-enoyl thioester reductase; member of the medium chain dehydrogenase/reductase family; localized to in mitochondria, where it has a probable role in fatty acid synthesis	467.444	0.200485	0.142213	1.40866	0.158935	0.3455
YBR027C		protein_coding	II	Dubious open reading frame; unlikely to encode a functional protein, based on available experimental and comparative sequence data	30.36	0.0110897	0.321065	0.0309865	0.97528	0.989875
YBR028C	YPK3	protein_coding	II	AGC kinase; phosphorylated by cAMP-dependent protein kinase (PKA) in a TORC1-dependent manner	571.065	0.00787627	0.203899	0.0385606	0.969241	0.987643
YBR029C	CDS1	protein_coding	II	Phosphatidate cytidylyltransferase (CDP-diglyceride synthetase); an enzyme that catalyzes that conversion of CTP + phosphate into diphosphate + CDP-diaclglyerol, a critical step in the synthesis of all major yeast phospholipids	1207.19	-0.00335871	0.175639	-0.0193562	0.984557	0.993493
YBR030W	RKM3	protein_coding	II	Ribosomal lysine methyltransferase; specific for monomethylation of Rpl42ap and Rpl42bp (lysine 40); nuclear SET domain containing protein; relocalizes to the cytosol in response to hypoxia	468.218	0.21155	0.155782	1.35686	0.174827	0.367643
YBR031W	RPL4A	protein_coding	II	Ribosomal 60S subunit protein L4A; N-terminally acetylated; homologous to mammalian ribosomal protein L4 and bacterial L4; RPL4A has a paralog, RPL4B, that arose from the whole genome duplication	2668.47	-0.507994	0.149121	-3.40634	0.000658413	0.00799945
YBR033W	EDS1	protein_coding	II	Putative zinc cluster protein, predicted to be a transcription factor; not an essential gene; EDS1 has a paralog, RGT1, that arose from the whole genome duplication	88.1159	1.10943	0.390733	2.84694	0.00441413	0.0305769
YBR034C	HMT1	protein_coding	II	Nuclear SAM-dependent mono- and asymmetric methyltransferase; modifies hnRNPs, including Npl3p and Hrp1p, affecting their activity and nuclear export; methylates U1 snRNP protein Snp1p and ribosomal protein Rps2p; interacts genetically with genes encoding components of Rpd3(L) and this interaction is important for Rpd3 recruitment to the subtelomeric region.	1381.46	-0.066498	0.186666	-0.356263	0.721643	0.852927
YBR035C	PDX3	protein_coding	II	Pyridoxine (pyridoxamine) phosphate oxidase; has homologs in E. coli and Myxococcus xanthus; transcription is under the general control of nitrogen metabolism	1073.69	0.549995	0.190337	2.88926	0.00386145	0.0276804
YBR036C	CSG2	protein_coding	II	Endoplasmic reticulum membrane protein; required for mannosylation of inositolphosphorylceramide and for growth at high calcium concentrations; protein abundance increases in response to DNA replication stress	1171.69	0.188244	0.0802387	2.3463	0.0189607	0.0843124
YBR037C	SCO1	protein_coding	II	Copper-binding protein of mitochondrial inner membrane; required for cytochrome c oxidase activity and respiration; may function to deliver copper to cytochrome c oxidase; similar to thioredoxins; SCO1 has a paralog, SCO2, that arose from the whole genome duplication	124.388	-0.411177	0.172017	-2.39005	0.0168462	0.0777921
YBR038W	CHS2	protein_coding	II	Chitin synthase II; catalyzes transfer of N-acetylglucosamine (GlcNAc) to chitin upon activation of zymogenic form; required for chitin synthesis in the primary septum during cytokinesis; localization regulated by Cdk1p during mitosis; phosphorylation by Dbf2p kinase regulates its dynamics and chitin synthesis during cytokinesis	577.523	0.0362138	0.135055	0.26846	0.788346	0.894197
YBR039W	ATP3	protein_coding	II	Gamma subunit of the F1 sector of mitochondrial F1F0 ATP synthase; F1F0 ATP synthase is a large, evolutionarily conserved enzyme complex required for ATP synthesis	1838.27	-0.194223	0.201025	-0.966168	0.33396	0.543625
YBR040W	FIG1	protein_coding	II	Integral membrane protein required for efficient mating; may participate in or regulate the low affinity Ca2+ influx system, which affects intracellular signaling and cell-cell fusion during mating	19.5725	0.874279	0.402157	2.14631	0.0318482	0.119132
YBR041W	FAT1	protein_coding	II	Very long chain fatty acyl-CoA synthetase and fatty acid transporter; activates imported fatty acids with a preference for very long lengths (C20-C26); has a separate function in the transport of long chain fatty acids	700.502	-0.226603	0.108527	-2.08799	0.0367983	0.130383
YBR042C	CST26	protein_coding	II	Putative transferase involved in phospholipid biosynthesis; required for incorporation of stearic acid into phosphatidylinositol; affects chromosome stability when overexpressed; CST26 has a paralog, YDR018C, that arose from the whole genome duplication	320.121	-0.239713	0.127644	-1.87821	0.0603527	0.183135
YBR043C	QDR3	protein_coding	II	Multidrug transporter of the major facilitator superfamily; member of the 12-spanner drug:H(+) antiporter DHA1 family; has a role in polyamine homeostasis; involved in spore wall asembly; sequence similarity to DTR1 and QDR1, and the triple mutant dtr1 qdr1 qdr3 exhibits reduced dityrosine fluorescence relative to the single mutants; expression is upregulated under polyamine stress; required for …	907.935	0.301639	0.226669	1.33159	0.182994	0.377578
YBR044C	TCM62	protein_coding	II	Protein involved in assembly of the succinate dehydrogenase complex; mitochondrial; putative chaperone	400.086	-0.128425	0.10377	-1.23683	0.216149	0.416197
YBR045C	GIP1	protein_coding	II	Meiosis-specific regulatory subunit of the Glc7p protein phosphatase; regulates spore wall formation and septin organization, required for expression of some late meiotic genes and for normal localization of Glc7p	192.942	1.60219	0.339351	4.7203	2.35496e-06	0.000107665
YBR046C	ZTA1	protein_coding	II	NADPH-dependent quinone reductase; GFP-tagged protein localizes to the cytoplasm and nucleus; has similarity to E. coli quinone oxidoreductase and to human zeta-crystallin	322.05	1.0597	0.422969	2.50641	0.0121963	0.0616507
YBR047W	FMP23	protein_coding	II	Putative protein of unknown function; proposed to be involved in iron or copper homeostasis; the authentic, non-tagged protein is detected in highly purified mitochondria in high-throughput studies	198.93	1.64892	0.651374	2.55408	0.0106468	0.0565135
YBR048W	RPS11B	protein_coding	II	Protein component of the small (40S) ribosomal subunit; homologous to mammalian ribosomal protein S11 and bacterial S17; RPS11B has a paralog, RPS11A, that arose from the whole genome duplication	3005.08	-0.615518	0.203497	-3.02396	0.00249488	0.020394
YBR049C	REB1	protein_coding	II	RNA polymerase I enhancer binding protein; DNA binding protein that binds to genes transcribed by both RNA polymerase I and RNA polymerase II; required for termination of RNA polymerase I transcription; REB1 has a paralog, NSI1, that arose from the whole genome duplication	1054.95	-0.147701	0.117306	-1.25921	0.207956	0.406558
YBR050C	REG2	protein_coding	II	Regulatory subunit of the Glc7p type-1 protein phosphatase; involved with Reg1p, Glc7p, and Snf1p in regulation of glucose-repressible genes, also involved in glucose-induced proteolysis of maltose permease; REG2 has a paralog, REG1, that arose from the whole genome duplication	31.8019	0.876475	0.340791	2.56442	0.0103349	0.0554667
YBR052C	RFS1	protein_coding	II	Protein of unknown function; member of a flavodoxin-like fold protein family that includes Pst2p and Ycp4p; green fluorescent protein (GFP)-fusion protein localizes to the cytoplasm in a punctate pattern; RFS1 has a paralog, PST2, that arose from the whole genome duplication	428.209	-0.458473	0.164857	-2.78072	0.00542382	0.0356306
YBR053C		protein_coding	II	Putative protein of unknown function; induced by cell wall perturbation	408.829	0.19515	0.15547	1.25435	0.209716	0.408446
YBR054W	YRO2	protein_coding	II	Protein of unknown function with similarity to archaeal rhodopsins; the authentic, non-tagged protein is detected in a phosphorylated state in highly purified mitochondria in high-throughput studies; transcriptionally regulated by Haa1p; YRO2 has a paralog, MRH1, that arose from the whole genome duplication	3077.39	0.827096	0.247144	3.34742	0.000815683	0.00941008
YBR055C	PRP6	protein_coding	II	Splicing factor; component of the U4/U6-U5 snRNP complex	692.948	0.0398876	0.0910255	0.438068	0.661337	0.813264
YBR056W		protein_coding	II	Putative glycoside hydrolase of the mitochondrial intermembrane space	1030.24	0.243296	0.160403	1.51642	0.129414	0.303705
YBR056W-A		protein_coding	II	Protein of unknown function; mRNA identified as translated by ribosome profiling data; partially overlaps dubious ORF YBR056C-B; YBR056W-A has a paralog, YDR034W-B, that arose from the whole genome duplication	162.804	0.949373	0.305252	3.11615	0.0018323	0.0166308
YBR057C	MUM2	protein_coding	II	Protein essential for meiotic DNA replication and sporulation; cytoplasmic protein; subunit of the MIS complex which controls mRNA methylation during during the induction of sporulation; also interacts with Orc2p, which is a component of the origin recognition complex	339.498	-0.740086	0.119253	-6.2055	5.4524e-10	1.05163e-07
YBR058C	UBP14	protein_coding	II	Ubiquitin-specific protease; specifically disassembles unanchored ubiquitin chains; involved in fructose-1,6-bisphosphatase (Fbp1p) degradation; similar to human isopeptidase T	897.686	0.194658	0.068169	2.85513	0.00430186	0.0300901
YBR058C-A	TSC3	protein_coding	II	Protein that stimulates the activity of serine palmitoyltransferase; involved in sphingolipid biosynthesis; Lcb1p and Lcb2p are the two components of serine palmitoyltransferase	307.218	0.0480524	0.169093	0.284111	0.776326	0.888387
YBR059C	AKL1	protein_coding	II	Ser-Thr protein kinase; member (with Ark1p and Prk1p) of the Ark kinase family; involved in endocytosis and actin cytoskeleton organization	1386.2	-0.0528357	0.106404	-0.496248	0.61972	0.78235
YBR060C	ORC2	protein_coding	II	Subunit of the origin recognition complex (ORC); ORC directs DNA replication by binding to replication origins and is also involved in transcriptional silencing; interacts with Spp1p and with trimethylated histone H3; phosphorylated by Cdc28p	399.317	-0.196903	0.123923	-1.58903	0.112054	0.274334
YBR061C	TRM7	protein_coding	II	2'-O-ribose methyltransferase; methylates the 2'-O-ribose of tRNA-Phe, tRNA-Trp, and tRNA-Leu at positions C32 and N34 of the tRNA anticodon loop; crucial biological role likely modification of tRNA-Phe; interacts with Trm732p and Rtt10p in 2'-O-methylation of C32 and N34 substrate tRNAs, respectively	342.675	0.0174987	0.13953	0.12501	0.900516	0.951882
YBR062C		protein_coding	II	Protein of unknown function that interacts with Msb2p; may play a role in activation of the filamentous growth pathway	119.771	-0.275814	0.16314	-1.69156	0.0907305	0.237686
YBR063C		protein_coding	II	Putative protein of unknown function; YBR063C is not an essential gene	329.415	0.521097	0.141714	3.67906	0.000234094	0.00376258
YBR064W		protein_coding	II	Dubious open reading frame; unlikely to encode a functional protein, based on available experimental and comparative sequence data; partially overlaps the uncharacterized ORF YBR063C	1.11984	0.574245	0.732738	0.854475	0.392842
YBR065C	ECM2	protein_coding	II	Pre-mRNA splicing factor; facilitates the cooperative formation of U2/U6 helix II in association with stem II in the spliceosome, function may be regulated by Slu7p	321.301	0.27608	0.147139	1.87765	0.0604289	0.183276
YBR066C	NRG2	protein_coding	II	Transcriptional repressor; mediates glucose repression and negatively regulates filamentous growth; activated in stochastic pulses of nuclear localization in response to low glucose	115.235	-0.33662	0.241032	-1.39582	0.162767	0.351136
YBR067C	TIP1	protein_coding	II	Major cell wall mannoprotein with possible lipase activity; transcription is induced by heat- and cold-shock; member of the Srp1p/Tip1p family of serine-alanine-rich proteins	1205.41	-0.0710698	0.235751	-0.301434	0.763083	0.880484
YBR068C	BAP2	protein_coding	II	High-affinity leucine permease; functions as a branched-chain amino acid permease involved in uptake of leucine, isoleucine and valine; contains 12 predicted transmembrane domains; BAP2 has a paralog, BAP3, that arose from the whole genome duplication	4913.26	0.521631	0.29834	1.74945	0.0802135	0.219644
YBR069C	TAT1	protein_coding	II	Amino acid transporter for valine, leucine, isoleucine, and tyrosine; low-affinity tryptophan and histidine transporter; overexpression confers FK506 and FTY720 resistance; protein abundance increases in response to DNA replication stress	1698.92	-0.414488	0.358282	-1.15424	0.248403	0.452387
YBR070C	ALG14	protein_coding	II	Component of UDP-GlcNAc transferase; required for the second step of dolichyl-linked oligosaccharide synthesis; anchors the catalytic subunit Alg13p to the ER membrane; similar to bacterial and human glycosyltransferases	144.367	-0.183644	0.202655	-0.907033	0.364389	0.573727
YBR071W		protein_coding	II	Protein of unknown function found in the cytoplasm and bud neck; mRNA expression may be regulated by the cell cycle and/or cell wall stress; overexpression of YBR071W affects endocytic protein trafficking	359.264	0.614299	0.189055	3.24977	0.00115498	0.0121498
YBR072W	HSP26	protein_coding	II	Small heat shock protein (sHSP) with chaperone activity; forms hollow, sphere-shaped oligomers that suppress unfolded proteins aggregation; long-lived protein that is preferentially retained in mother cells and forms cytoplasmic foci; oligomer activation requires heat-induced conformational change; also has mRNA binding activity	2486.23	2.3518	0.387109	6.07757	1.22015e-09	2.03533e-07
YBR073W	RDH54	protein_coding	II	DNA-dependent ATPase; DNA recombination/repair translocase, supercoils DNA and promotes DNA strand opening; stimulates strand exchange by modifying dsDNA topology; involved in recombinational repair of DNA double-strand breaks (DSBs) during mitosis and meiosis; phosphorylated in Mec1p-, Rad53p-dependent way in response to one DSB; contributes to remodelling of nucleosomes; proposed to be involved…	1318.83	-0.483404	0.144964	-3.33481	0.000853578	0.00973804
YBR074W	PFF1	protein_coding	II	Multi-spanning vacuolar membrane protease; glycosylated transmembrane protein bearing homology to the M28 family of metalloproteases; has a lumenal-facing protease domain; proposed role in vacuole physiology	1156.81	-0.0957587	0.083942	-1.14089	0.253916	0.457433
YBR076C-A		protein_coding	II	Dubious open reading frame; unlikely to encode a functional protein, based on available experimental and comparative sequence data; partially overlaps verified gene ECM8; identified by fungal homology and RT-PCR	82.8126	0.4544	0.19063	2.38152	0.0172414	0.0787879
YBR076W	ECM8	protein_coding	II	Non-essential protein of unknown function	14.2766	1.23031	0.552001	2.23616	0.0253412	0.102561
YBR077C	SLM4	protein_coding	II	Component of the EGO and GSE complexes; essential for integrity and function of EGO; EGO is involved in the regulation of microautophagy and GSE is required for proper sorting of amino acid permease Gap1p; gene exhibits synthetic genetic interaction with MSS4	185.581	0.523125	0.163478	3.19819	0.00138294	0.0135916
YBR078W	ECM33	protein_coding	II	GPI-anchored protein of unknown function; possible role in apical bud growth; GPI-anchoring on the plasma membrane crucial to function; phosphorylated in mitochondria; similar to Sps2p; ECM33 has a paralog, PST1, that arose from the whole genome duplication	4112.11	-0.120058	0.18677	-0.642755	0.520383	0.712626
YBR079C	RPG1	protein_coding	II	eIF3a subunit of the eukaryotic translation initiation factor 3 (eIF3); subunit of the core complex of eIF3; essential for translation; part of a Prt1p-Rpg1p-Nip1p subcomplex that stimulates binding of mRNA and tRNA(i)Met to ribosomes; involved in translation reinitiation	3572.94	-0.394571	0.14498	-2.72159	0.00649679	0.0399507
YBR080C	SEC18	protein_coding	II	AAA ATPase and SNARE disassembly chaperone; required for vesicular transport between ER and Golgi, the 'priming' step in homotypic vacuole fusion, autophagy, and protein secretion; releases Sec17p from SNAP complexes; has similarity to mammalian N-ethylmaleimide-sensitive factor (NSF)	1107.98	-0.0041609	0.0854025	-0.0488808	0.961014	0.984514
YBR081C	SPT7	protein_coding	II	Subunit of the SAGA transcriptional regulatory complex; involved in proper assembly of the complex; also present as a C-terminally truncated form in the SLIK/SALSA transcriptional regulatory complex	1038.17	0.0967565	0.0942129	1.02759	0.304145	0.511493
YBR082C	UBC4	protein_coding	II	Ubiquitin-conjugating enzyme (E2); key E2 partner with Ubc1p for the anaphase-promoting complex (APC); mediates degradation of abnormal or excess proteins, including calmodulin and histone H3; regulates levels of DNA Polymerase-{alpha} to promote efficient and accurate DNA replication; interacts with many SCF ubiquitin protein ligases; component of the cellular stress response; UBC4 has a paralog…	1209.44	-0.230704	0.0994163	-2.32064	0.0203065	0.0884224
YBR083W	TEC1	protein_coding	II	Transcription factor targeting filamentation genes and Ty1 expression; Ste12p activation of most filamentation gene promoters depends on Tec1p and Tec1p transcriptional activity is dependent on its association with Ste12p; binds to TCS elements upstream of filamentation genes, which are regulated by Tec1p/Ste12p/Dig1p complex; competes with Dig2p for binding to Ste12p/Dig1p; positive regulator of…	710.725	-0.680245	0.228927	-2.97066	0.00297165	0.0228805
YBR084C-A	RPL19A	protein_coding	II	Ribosomal 60S subunit protein L19A; rpl19a and rpl19b single null mutations result in slow growth, while the double null mutation is lethal; homologous to mammalian ribosomal protein L19, no bacterial homolog; RPL19A has a paralog, RPL19B, that arose from the whole genome duplication	4271.04	-0.41575	0.20087	-2.06919	0.0385284	0.134553
YBR084W	MIS1	protein_coding	II	Mitochondrial C1-tetrahydrofolate synthase; involved in interconversion between different oxidation states of tetrahydrofolate (THF); provides activities of formyl-THF synthetase, methenyl-THF cyclohydrolase, and methylene-THF dehydrogenase	2764.26	-0.695142	0.229064	-3.03376	0.0024153	0.0199828
YBR085C-A		protein_coding	II	Protein of unknown function; green fluorescent protein (GFP)-fusion protein localizes to the cytoplasm and to the nucleus; protein abundance increases in response to DNA replication stress	989.786	1.07215	0.300939	3.5647	0.000364268	0.00534029
YBR085W	AAC3	protein_coding	II	Mitochondrial inner membrane ADP/ATP translocator; exchanges cytosolic ADP for mitochondrially synthesized ATP; expressed under anaerobic conditions; similar to Aac1p; has roles in maintenance of viability and in respiration; AAC3 has a paralog, PET9, that arose from the whole genome duplication	30.1299	-0.0508996	0.378605	-0.134679	0.892866	0.947624
YBR086C	IST2	protein_coding	II	Cortical ER protein involved in ER-plasma membrane tethering; one of 6 proteins (Ist2p, Scs2p, Scs22p, Tcb1p, Tcb2p, Tcb3p) that connect ER to the plasma membrane (PM) and regulate PM phosphatidylinositol-4-phosphate (PI4P) levels by controlling access of Sac1p phosphatase to its substrate PI4P in the PM; localizes to the mother cell in small-budded cells and to the bud in medium- and large-budde…	2244.09	-0.102552	0.13491	-0.760149	0.447166	0.651454
YBR087W	RFC5	protein_coding	II	Subunit of heteropentameric Replication factor C (RF-C); RF-C is a DNA binding protein and ATPase that acts as a clamp loader of the proliferating cell nuclear antigen (PCNA) processivity factor for DNA polymerases delta and epsilon	354.851	-0.356854	0.136058	-2.62259	0.0087265	0.0496493
YBR088C	POL30	protein_coding	II	Proliferating cell nuclear antigen (PCNA); functions as the sliding clamp for DNA polymerase delta; may function as a docking site for other proteins required for mitotic and meiotic chromosomal DNA replication and for DNA repair	579.213	-0.425646	0.233182	-1.82395	0.0681594	0.198903
YBR089C-A	NHP6B	protein_coding	II	High-mobility group (HMG) protein; binds to and remodels nucleosomes; involved in recruiting FACT and other chromatin remodelling complexes to the chromosomes; functionally redundant with Nhp6Ap; required for transcriptional initiation fidelity of some tRNA genes; homologous to mammalian HMGB1 and HMGB2; NHP6B has a paralog, NHP6A, that arose from the whole genome duplication	342.493	0.112679	0.149051	0.755247	0.450101	0.653652
YBR089W		protein_coding	II	Dubious open reading frame; unlikely to encode a functional protein, based on available experimental and comparative sequence data; almost completely overlaps the verified gene POL30	4.99148	0.262285	0.707659	0.424019	0.671552	0.818253
YBR090C		protein_coding	II	Putative protein of unknown function; green fluorescent protein (GFP)-fusion protein localizes to the cytoplasm and nucleus	27.7605	0.165509	0.314861	0.524075	0.600227	0.769867
YBR091C	TIM12	protein_coding	II	Essential protein of the inner mitochondrial membrane; peripherally localized; component of the TIM22 complex, which is a twin-pore translocase that mediates insertion of numerous multispanning inner membrane proteins	73.6973	-0.252893	0.274776	-0.921038	0.357031	0.566185
YBR092C	PHO3	protein_coding	II	Constitutively expressed acid phosphatase similar to Pho5p; brought to the cell surface by transport vesicles; hydrolyzes thiamin phosphates in the periplasmic space, increasing cellular thiamin uptake; expression is repressed by thiamin	702.631	-1.27406	0.398752	-3.18285	0.00145831	0.0140417
YBR093C	PHO5	protein_coding	II	Repressible acid phosphatase; 1 of 3 repressible acid phosphatases that also mediates extracellular nucleotide-derived phosphate hydrolysis; secretory pathway derived cell surface glycoprotein; induced by phosphate starvation and coordinately regulated by PHO4 and PHO2	164.71	0.789231	0.289743	2.72089	0.00651074	0.0399843
YBR094W	PBY1	protein_coding	II	Putative tubulin tyrosine ligase associated with P-bodies; forms cytoplasmic foci upon DNA replication stress	497.977	-0.267104	0.140081	-1.90682	0.0565434	0.175811
YBR095C	RXT2	protein_coding	II	Component of the histone deacetylase Rpd3L complex; possibly involved in cell fusion and invasive growth; relocalizes to the cytosol in response to hypoxia	472.481	0.170625	0.120028	1.42239	0.154914	0.340523
YBR096W		protein_coding	II	Putative protein of unknown function; green fluorescent protein (GFP)-fusion protein localizes to the ER	530.1	0.124134	0.104509	1.18708	0.235196	0.437898
YBR097W	VPS15	protein_coding	II	Serine/threonine protein kinase involved in vacuolar protein sorting; functions as a membrane-associated complex with Vps34p; active form recruits Vps34p to the Golgi membrane; interacts with the GDP-bound form of Gpa1p; myristoylated; a fraction is localized, with Vps34p, to nuclear pores at nucleus-vacuole junctions and may facilitate transcription elongation for genes positioned at the nuclear…	752.139	0.0990403	0.0979221	1.01144	0.311808	0.518394
YBR098W	MMS4	protein_coding	II	Subunit of structure-specific Mms4p-Mus81p endonuclease; cleaves branched DNA; involved in recombination, DNA repair, and joint molecule formation/resolution during meiotic recombination; phosphorylation of the non-catalytic subunit Mms4p by Cdc28p and Cdc5p during mitotic cell cycle activates the function of Mms4p-Mus81p	187.806	0.0292431	0.157424	0.185565	0.852786	0.926827
YBR099C		protein_coding	II	Dubious open reading frame; unlikely to encode a functional protein, based on available experimental and comparative sequence data; completely overlaps the verified gene MMS4	38.2014	0.113408	0.310855	0.370479	0.711026	0.844937
YBR101C	FES1	protein_coding	II	Hsp70 (Ssa1p) nucleotide exchange factor; required for the release of misfolded proteins from the Hsp70 system to the Ub-proteasome machinery for destruction; cytosolic homolog of Sil1p, which is the nucleotide exchange factor for BiP (Kar2p) in the endoplasmic reticulum; protein abundance increases in response to DNA replication stress	1050.62	-0.000154218	0.137626	-0.000130556	0.999896	0.999896
YBR102C	EXO84	protein_coding	II	Exocyst subunit with dual roles in exocytosis and spliceosome assembly; subunit of the the exocyst complex which mediates polarized targeting and tethering of post-Golgi secretory vesicles to active sites of exocytosis at the plasma membrane (PM) prior to SNARE-mediated fusion; required for exocyst assembly and targeting the complex to specific sites on the bud tip PM; associates the U1 snRNP; ro…	673.906	0.245638	0.123701	1.98614	0.047018	0.155016
YBR103W	SIF2	protein_coding	II	WD40 repeat-containing subunit of Set3C histone deacetylase complex; complex represses early/middle sporulation genes; antagonizes telomeric silencing; binds specifically to the Sir4p N-terminus	310.801	-0.0566904	0.154848	-0.366503	0.71399	0.847125
YBR104W	YMC2	protein_coding	II	Putative mitochondrial inner membrane transporter; proposed role in oleate metabolism and glutamate biosynthesis; member of the mitochondrial carrier (MCF) family; YMC2 has a paralog, YMC1, that arose from the whole genome duplication	619.129	0.605762	0.346856	1.74571	0.0808609	0.220634
YBR105C	VID24	protein_coding	II	GID Complex regulatory subunit; binds GID Complex in response to glucose through interactions with complex member Vid28p; regulates fructose-1,6-bisphosphatase (FBPase) targeting to the vacuole; promotes proteasome-dependent catabolite degradation of FBPase; peripheral membrane protein located at Vid (vacuole import and degradation) vesicles	1337.53	0.899709	0.2173	4.14124	3.45429e-05	0.000896785
YBR106W	PHO88	protein_coding	II	Probable membrane protein; involved in phosphate transport; role in the maturation of secretory proteins; pho88 pho86 double null mutant exhibits enhanced synthesis of repressible acid phosphatase at high inorganic phosphate concentrations	2071.08	-0.404608	0.140518	-2.87923	0.00398653	0.028396
YBR107C	IML3	protein_coding	II	Outer kinetochore protein and component of the Ctf19 complex; involved in the establishment of pericentromeric cohesion during mitosis; prevents non-disjunction of sister chromatids during meiosis II; forms a stable complex with Chl4p; required for localization of Sgo1p to pericentric sites during meiosis I; orthologous to human centromere constitutive-associated network (CCAN) subunit CENP-L and…	83.796	0.0709851	0.203437	0.348514	0.727454	0.85704
YBR108W	AIM3	protein_coding	II	Protein that inhibits barbed-end actin filament elongation; interacts with Rvs167p; null mutant is viable and displays elevated frequency of mitochondrial genome loss	391.361	0.00767818	0.156342	0.0499463	0.960165	0.984245
YBR109C	CMD1	protein_coding	II	Calmodulin; Ca++ binding protein that regulates Ca++ independent processes (mitosis, bud growth, actin organization, endocytosis, etc.) and Ca++ dependent processes (stress-activated pathways), targets include Nuf1p, Myo2p and calcineurin	1048.74	0.396475	0.120052	3.30226	0.000959077	0.0105465
YBR109W-A		protein_coding	II	Putative protein of unknown function; questionable ORF from MIPS	24.8188	0.793775	0.428934	1.8802	0.0600803	0.182659
YBR110W	ALG1	protein_coding	II	Mannosyltransferase; involved in asparagine-linked glycosylation in the endoplasmic reticulum (ER); essential for viability, mutation is functionally complemented by human ortholog	528.625	0.214334	0.129271	1.65853	0.0972104	0.249889
YBR111C	YSA1	protein_coding	II	Nudix hydrolase family member with ADP-ribose pyrophosphatase activity; shown to metabolize O-acetyl-ADP-ribose to AMP and acetylated ribose 5'-phosphate	928.946	0.23576	0.240147	0.981398	0.326396	0.534497
YBR111W-A	SUS1	protein_coding	II	Component of both the SAGA histone acetylase and TREX-2 complexes; interacts with RNA polymerase II; involved in mRNA export coupled transcription activation and elongation; involved in post-transcriptional tethering of active genes to the nuclear periphery and to non-nascent mRNP	151.612	0.0335148	0.202524	0.164936	0.868994	0.934794
YBR112C	CYC8	protein_coding	II	General transcriptional co-repressor; acts together with Tup1p; also acts as part of a transcriptional co-activator complex that recruits the SWI/SNF and SAGA complexes to promoters; can form the prion	1331.38	-0.0840963	0.105419	-0.797685	0.425054	0.632164
YBR113W		protein_coding	II	Dubious open reading frame; unlikely to encode a functional protein, based on available experimental and comparative sequence data; partially overlaps the verified gene CYC8	8.24366	-0.0706595	0.67276	-0.0812783	0.935221	0.969534
YBR114W	RAD16	protein_coding	II	Nucleotide excision repair (NER) protein; binds damaged DNA during NER; binds DNA in an ATP-dependent manner (with Rad7p) during NER; required for NER of non-transcribed chromatin; subunit of Nucleotide Excision Repair Factor 4 (NEF4) and the Elongin-Cullin-Socs (ECS) ligase complex	514.569	0.0275424	0.139922	0.196846	0.843948	0.9229
YBR115C	LYS2	protein_coding	II	Alpha aminoadipate reductase; catalyzes the reduction of alpha-aminoadipate to alpha-aminoadipate 6-semialdehyde, which is the fifth step in biosynthesis of lysine; activation requires posttranslational phosphopantetheinylation by Lys5p	3503.59	-0.0748606	0.613476	0.29411	0.768674	0.883639
YBR116C		protein_coding	II	Dubious open reading frame; unlikely to encode a functional protein, based on available experimental and comparative sequence data; partially overlaps the verified gene TKL2	7.17429	0.463806	0.566949	0.807149	0.419581	0.626731
YBR117C	TKL2	protein_coding	II	Transketolase; catalyzes conversion of xylulose-5-phosphate and ribose-5-phosphate to sedoheptulose-7-phosphate and glyceraldehyde-3-phosphate in the pentose phosphate pathway; needed for synthesis of aromatic amino acids; TKL2 has a paralog, TKL1, that arose from the whole genome duplication	157.751	1.43512	0.357459	4.02365	5.7302e-05	0.00133965
YBR118W	TEF2	protein_coding	II	Translational elongation factor EF-1 alpha; also encoded by TEF1; functions in the binding reaction of aminoacyl-tRNA (AA-tRNA) to ribosomes; TEF2-RFP levels increase during replicative aging; may also have a role in tRNA re-export from the nucleus; TEF2 has a paralog, TEF1, that arose from the whole genome duplication	9368.2	-0.567324	0.19008	-2.98414	0.00284376	0.02229
YBR119W	MUD1	protein_coding	II	U1 snRNP A protein; homolog of human U1-A; involved in nuclear mRNA splicing	211.471	-0.136356	0.145628	-0.935401	0.349582	0.55839
YBR120C	CBP6	protein_coding	II	Mitochondrial protein required for translation of the COB mRNA; forms a complex with Cbp3p that binds to mt ribosomes near the polypeptide tunnel exit and promotes efficient translation of the COB mRNA; Cbp3p-Cbp6p complex also interacts with newly synthesized cytochrome b (Cobp) and Cbp4p to promote assembly of Cobp into the cytochrome bc1 complex; Cbp3p-Cbp6p complex is sequestered if assembly …	139.991	-0.412423	0.16848	-2.44792	0.0143684	0.0695411
YBR121C	GRS1	protein_coding	II	Cytoplasmic and mitochondrial glycyl-tRNA synthase; ligates glycine to the cognate anticodon-bearing tRNA; transcription termination factor that may interact with the 3'-end of pre-mRNA to promote 3'-end formation; GRS1 has a paralog, GRS2, that arose from the whole genome duplication	4570.37	-0.589532	0.199391	-2.95622	0.00311436	0.0236928
YBR122C	MRPL36	protein_coding	II	Mitochondrial ribosomal protein of the large subunit; overproduction suppresses mutations in the COX2 leader peptide-encoding region	395.647	-0.113146	0.14604	-0.774824	0.438444	0.643691
YBR123C	TFC1	protein_coding	II	Subunit of RNA polymerase III transcription initiation factor complex; one of six subunits of the RNA polymerase III transcription initiation factor complex (TFIIIC); part of the TauA globular domain of TFIIIC that binds DNA at the BoxA promoter sites of tRNA and similar genes; human homolog is TFIIIC-63	425.423	-0.105547	0.105421	-1.00088	0.316883	0.523902
YBR124W		protein_coding	II	Putative protein of unknown function	2.56776	-0.0485509	0.750276	-0.131478	0.895397
YBR125C	PTC4	protein_coding	II	Cytoplasmic type 2C protein phosphatase (PP2C); identified as a high-copy number suppressor of cnb1 mpk1 synthetic lethality; overexpression decreases high-osmolarity induced Hog1p phosphorylation and kinase activity	298.686	-0.0787987	0.130929	-0.601784	0.547318	0.733083
YBR126C	TPS1	protein_coding	II	Synthase subunit of trehalose-6-P synthase/phosphatase complex; synthesizes the storage carbohydrate trehalose; also found in a monomeric form; expression is induced by the stress response and repressed by the Ras-cAMP pathway; protein abundance increases in response to DNA replication stress and in response to prolonged exposure to boric acid	2814.85	0.115538	0.187319	0.616833	0.537345	0.72657
YBR126W-A		protein_coding	II	Protein of unknown function; identified by gene-trapping, microarray analysis, and genome-wide homology searches; mRNA identified as translated by ribosome profiling data; partially overlaps the dubious ORF YBR126W-B	30.6357	-0.189357	0.311795	-0.609852	0.54196	0.730567
YBR126W-B		protein_coding	II	Dubious open reading frame; unlikely to encode a functional protein, based on available experimental and comparative sequence data; partially overlaps the dubious ORF YBR126W-A; identified by SAGE	289.258	0.0357307	0.181693	0.195465	0.845029	0.923264
YBR127C	VMA2	protein_coding	II	Subunit B of V1 peripheral membrane domain of vacuolar H+-ATPase; an electrogenic proton pump found throughout the endomembrane system; contains nucleotide binding sites; also detected in the cytoplasm; protein abundance increases in response to DNA replication stress	6369.4	-0.245619	0.11674	-2.10395	0.0353829	0.127412
YBR128C	ATG14	protein_coding	II	Autophagy-specific subunit of phosphatidylinositol 3-kinase complex I; Atg14p targets complex I to the phagophore assembly site (PAS); required for localizing additional ATG proteins to the PAS; required for overflow degradation of misfolded proteins when ERAD is saturated; homolog of human Barkor; other members are Vps34, Vps15, and Vps30p	79.6832	0.132545	0.293013	0.453065	0.650502	0.805073
YBR129C	OPY1	protein_coding	II	Protein of unknown function; overproduction blocks cell cycle arrest in the presence of mating pheromone; the authentic, non-tagged protein is detected in highly purified mitochondria in high-throughput studies	357.353	-0.0616791	0.143689	-0.429419	0.667618	0.816152
YBR130C	SHE3	protein_coding	II	Protein adaptor between Myo4p and the She2p-mRNA complex; part of the mRNA localization machinery that restricts accumulation of certain proteins to the bud; also required for cortical ER inheritance	576.858	-0.212651	0.0983759	-2.16142	0.0306632	0.116392
YBR131W	CCZ1	protein_coding	II	Subunit of a heterodimeric guanine nucleotide exchange factor (GEF); subunit of the Mon1-Ccz1 GEF complex, which stimulates nucleotide exchange and activation of Ypt7p, a Rab family GTPase involved in membrane tethering and fusion events at the late endosome and vacuole; GEF activity is stimulated by membrane association and anionic phospholipids; involved in localizing Ypt7p to the vacuolar memb…	295.286	0.196732	0.15193	1.29627	0.194881	0.39205
YBR132C	AGP2	protein_coding	II	Plasma membrane regulator of polyamine and carnitine transport; has similarity to transporters but lacks transport activity; may act as a sensor that transduces environmental signals; has a positive or negative regulatory effect on transcription of many transporter genes	416.436	0.235348	0.166923	1.40961	0.158656	0.345373
YBR133C	HSL7	protein_coding	II	Protein arginine N-methyltransferase; exhibits septin and Hsl1p-dependent bud neck localization and periodic Hsl1p-dependent phosphorylation; required along with Hsl1p for bud neck recruitment, phosphorylation, and degradation of Swe1p; relocalizes away from bud neck upon DNA replication stress	804.351	-0.139027	0.12152	-1.14414	0.252566	0.456287
YBR135W	CKS1	protein_coding	II	Cyclin-dependent protein kinase regulatory subunit and adaptor; interacts with Cdc28p(Cdk1p); required for G1/S and G2/M phase transitions and budding; mediates the phosphorylation and degradation of Sic1p; modulates proteolysis of M-phase targets through interactions with the proteasome; role in transcriptional regulation, recruiting proteasomal subunits to target gene promoters	236.619	-0.321643	0.17105	-1.88042	0.0600503	0.182659
YBR136W	MEC1	protein_coding	II	Genome integrity checkpoint protein and PI kinase superfamily member; Mec1p and Dun1p function in same pathway to regulate dNTP pools and telomere length; signal transducer required for cell cycle arrest and transcriptional responses to damaged or unreplicated DNA; facilitates replication fork progression and regulates P-body formation under replication stress; promotes interhomolog recombination…	1048.06	-0.13788	0.106471	-1.29484	0.195375	0.392217
YBR137W		protein_coding	II	Protein with a role in ER delivery of tail-anchored membrane proteins; interacts with Sgt2p; binds to the TRC complex, which inserts proteins into the ER membrane; interacts with Msn5p karyopherin; YBR137W is not an essential gene	353.338	0.510505	0.158861	3.21161	0.00131992	0.013268
YBR138C		protein_coding	II	Cytoplasmic protein of unknown function; APCC(Cdh1) substrate; potentially phosphorylated by Cdc28p; YBR138C is not an essential gene	207.134	-0.147869	0.192832	-0.765379	0.444046	0.648675
YBR139W		protein_coding	II	Putative serine type carboxypeptidase; role in phytochelatin synthesis; green fluorescent protein (GFP)-fusion protein localizes to the vacuole; expression induced by nitrogen limitation in a GLN3, GAT1-independent manner	1185.23	0.17934	0.209495	0.855807	0.392105	0.601011
YBR140C	IRA1	protein_coding	II	GTPase-activating protein; negatively regulates RAS by converting it from the GTP- to the GDP-bound inactive form, required for reducing cAMP levels under nutrient limiting conditions, mediates membrane association of adenylate cyclase; mutations cause catalase T deficiency, defective glycogen synthesis and defective trehalose accumulation; IRA1 has a paralog, IRA2, that arose from the whole geno…	4249.39	0.315093	0.0825181	3.81861	0.000134206	0.00251007
YBR141C	BMT2	protein_coding	II	Nucleolar S-adenosylmethionine-dependent rRNA methyltransferase; methylates adenine (m1A) of the large subunit (LSU) rRNA at position 2142; belongs to Rossmann fold superfamily; green fluorescent protein (GFP)-fusion protein localizes to the nucleolus; YBR141C is not an essential gene	185.724	0.129553	0.189596	0.683206	0.494477	0.691259
YBR142W	MAK5	protein_coding	II	Essential nucleolar protein; putative DEAD-box RNA helicase required for maintenance of M1 dsRNA virus; involved in biogenesis of large (60S) ribosomal subunits	1056.61	-0.291792	0.174812	-1.66919	0.0950804	0.24626
YBR143C	SUP45	protein_coding	II	Polypeptide release factor (eRF1) in translation termination; mutant form acts as a recessive omnipotent suppressor; methylated by Mtq2p-Trm112p in ternary complex eRF1-eRF3-GTP; mutation of methylation site confers resistance to zymocin; has a role in cytokinesis through interaction with Mlc1p	2694.09	-0.265525	0.13528	-1.96275	0.0496756	0.160523
YBR145W	ADH5	protein_coding	II	Alcohol dehydrogenase isoenzyme V; involved in ethanol production; ADH5 has a paralog, ADH1, that arose from the whole genome duplication	1347.68	1.08239	0.613201	1.74625	0.0807681	0.220497
YBR146W	MRPS9	protein_coding	II	Mitochondrial ribosomal protein of the small subunit	589.864	-0.249202	0.108119	-2.30499	0.0211669	0.0907869
YBR147W	RTC2	protein_coding	II	Putative vacuolar membrane transporter for cationic amino acids; likely contributes to amino acid homeostasis by exporting cationic amino acids from the vacuole; positive regulation by Lys14p suggests that lysine may be the primary substrate; member of the PQ-loop family, with seven transmembrane domains; similar to mammalian PQLC2 vacuolar transporter; RTC2 has a paralog, YPQ1, that arose from t…	473.088	1.86769	0.678098	2.85199	0.00434466	0.0302655
YBR148W	YSW1	protein_coding	II	Protein required for normal prospore membrane formation; interacts with Gip1p, which is the meiosis-specific regulatory subunit of the Glc7p protein phosphatase; expressed specifically in spores and localizes to the prospore membrane; YSW1 has a paralog, SPO21, that arose from the whole genome duplication	122.497	1.57952	0.48671	3.27367	0.00106159	0.0114548
YBR149W	ARA1	protein_coding	II	NADP+ dependent arabinose dehydrogenase; involved in carbohydrate metabolism; purified as homodimer; naturally occurs with a N-terminus degradation product	1890.61	0.261234	0.136037	1.9202	0.054833	0.171838
YBR150C	TBS1	protein_coding	II	Putative protein of unknown function; the authentic, non-tagged protein is detected in highly purified mitochondria in high-throughput studies; TBS1 has a paralog, HAL9, that arose from the whole genome duplication	621.707	-0.111679	0.161755	-0.689697	0.490385	0.688028
YBR151W	APD1	protein_coding	II	Protein of unknown function; required for normal localization of actin patches and for normal tolerance of sodium ions and hydrogen peroxide; localizes to both cytoplasm and nucleus	661.615	0.00904874	0.0871198	0.10373	0.917384	0.962286
YBR152W	SPP381	protein_coding	II	mRNA splicing factor, component of U4/U6.U5 tri-snRNP; interacts genetically and physically with Prp38p; relocalizes to the cytosol in response to hypoxia	125.616	-0.161956	0.183313	-0.883549	0.37694	0.586013
YBR153W	RIB7	protein_coding	II	Diaminohydroxyphoshoribosylaminopyrimidine deaminase; catalyzes the second step of the riboflavin biosynthesis pathway	213.712	-0.801416	0.158126	-5.06748	4.03124e-07	2.53886e-05
YBR154C	RPB5	protein_coding	II	RNA polymerase subunit ABC27; common to RNA polymerases I, II, and III; contacts DNA and affects transactivation	1075.36	-0.141862	0.137537	-1.03152	0.302299	0.509608
YBR155W	CNS1	protein_coding	II	TPR-containing co-chaperone; binds both Hsp82p (Hsp90) and Ssa1p (Hsp70) and stimulates the ATPase activity of SSA1, ts mutants reduce Hsp82p function while over expression suppresses the phenotypes of an HSP82 ts allele and a cpr7 deletion	250.595	0.122049	0.156812	0.778456	0.4363	0.642281
YBR156C	SLI15	protein_coding	II	Subunit of the conserved chromosomal passenger complex (CPC); complex regulates kinetochore-microtubule attachments, activation of the spindle tension checkpoint, and mitotic spindle disassembly; other complex members are Ipl1p, Bir1p, and Nbl1p	276.41	-0.282181	0.175724	-1.60533	0.108421	0.269322
YBR157C	ICS2	protein_coding	II	Protein of unknown function; null mutation does not confer any obvious defects in growth, spore germination, viability, or carbohydrate utilization	145.471	0.364131	0.187316	1.9413	0.0522222	0.166313
YBR158W	AMN1	protein_coding	II	Protein required for daughter cell separation; multiple mitotic checkpoints, and chromosome stability; contains 12 degenerate leucine-rich repeat motifs; expression is induced by the Mitotic Exit Network (MEN)	1789.69	-0.32573	0.174847	-1.86282	0.0624879	0.187585
YBR159W	IFA38	protein_coding	II	Microsomal beta-keto-reductase; contains oleate response element (ORE) sequence in the promoter region; mutants exhibit reduced VLCFA synthesis, accumulate high levels of dihydrosphingosine, phytosphingosine and medium-chain ceramides	839.184	-0.479848	0.137511	-3.48942	0.000484067	0.00641309
YBR160W	CDC28	protein_coding	II	Cyclin-dependent kinase (CDK) catalytic subunit; master regulator of mitotic and meiotic cell cycles; alternately associates with G1 (CLNs), S and G2/M (CLBs) phase cyclins, which provide substrate specificity; regulates cell cycle and basal transcription, chromosome duplication and segregation, lipid biosynthesis, membrane trafficking, polarized growth, and morphogenesis; abundance increases in …	388.311	-0.352306	0.131124	-2.68696	0.00721054	0.0430349
YBR161W	CSH1	protein_coding	II	Mannosylinositol phosphorylceramide (MIPC) synthase catalytic subunit; forms a complex with regulatory subunit Csg2p; function in sphingolipid biosynthesis is overlapping with that of Sur1p; CSH1 has a paralog, SUR1, that arose from the whole genome duplication	243.367	-0.54864	0.15579	-3.52137	0.000429329	0.00599506
YBR162C	TOS1	protein_coding	II	Covalently-bound cell wall protein of unknown function; identified as a cell cycle regulated SBF target gene; deletion mutants are highly resistant to treatment with beta-1,3-glucanase; has sequence similarity to YJL171C	2513.84	-0.151271	0.141815	-1.06677	0.286075	0.492415
YBR162W-A	YSY6	protein_coding	II	Protein of unknown function; expression suppresses a secretory pathway mutation in E. coli; has similarity to the mammalian RAMP4 protein involved in secretion	359.406	0.0260589	0.147283	0.176204	0.860134	0.929508
YBR163W	EXO5	protein_coding	II	Mitochondrial 5'-3' exonuclease and sliding exonuclease; required for mitochondrial genome maintenance; distantly related to the RecB nuclease domain of bacterial RecBCD recombinases; may be regulated by the transcription factor Ace2	476.923	0.388472	0.0982435	3.95406	7.68352e-05	0.00162407
YBR164C	ARL1	protein_coding	II	Soluble GTPase with a role in regulation of membrane traffic; regulates potassium influx; role in membrane organization at trans-Golgi network; G protein of the Ras superfamily, similar to ADP-ribosylation factor	281.663	0.0687173	0.152006	0.451343	0.651743	0.806447
YBR165W	UBS1	protein_coding	II	Ubiquitin-conjugating enzyme suppressor that regulates Cdc34p; functions as a general positive regulator of Cdc34p activity; nuclear protein that may represent a link between nucleocytoplasmic transport and ubiquitin ligase activity	336.377	0.156329	0.184545	0.847915	0.396485	0.604821
YBR166C	TYR1	protein_coding	II	Prephenate dehydrogenase involved in tyrosine biosynthesis; expression is dependent on phenylalanine levels	620.693	0.355266	0.148005	2.40139	0.0163329	0.0762531
YBR167C	POP7	protein_coding	II	Subunit of both RNase MRP and nuclear RNase P; forms a soluble heterodimer with Pop6p that binds P3 domain of RNase MRP and RNase P RNAs; RNase MRP cleaves pre-rRNA, while nuclear RNase P cleaves tRNA precursors to generate mature 5' ends and facilitates turnover of nuclear RNAs	125.46	0.681086	0.180006	3.77885	0.000157554	0.0028031
YBR168W	PEX32	protein_coding	II	Peroxisomal integral membrane protein; involved in negative regulation of peroxisome size; partially functionally redundant with Pex31p; genetic interactions suggest action at a step downstream of steps mediated by Pex28p and Pex29p	208.407	0.274199	0.133295	2.05601	0.0397812	0.137398
YBR169C	SSE2	protein_coding	II	Member of the heat shock protein 70 (HSP70) family; may be involved in protein folding; localized to the cytoplasm; SSE2 has a paralog, SSE1, that arose from the whole genome duplication	1384.27	0.600193	0.122502	4.89926	9.62006e-07	5.30134e-05
YBR170C	NPL4	protein_coding	II	Substrate-recruiting cofactor of the Cdc48p-Npl4p-Ufd1p segregase; assists Cdc48p in the dislocation of misfolded, polyubiquitinated ERAD substrates that are subsequently delivered to the proteasome for degradation; also involved in the regulated destruction of resident ER membrane proteins, such as HMG-CoA reductase (Hmg1/2p) and cytoplasmic proteins (Fbp1p); role in mobilizing membrane bound tr…	614.474	0.112981	0.131274	0.861495	0.388965	0.599289
YBR171W	SEC66	protein_coding	II	Non-essential subunit of Sec63 complex; with Sec61 complex, Kar2p/BiP and Lhs1p forms a channel competent for SRP-dependent and post-translational SRP-independent protein targeting and import into the ER; other members are Sec63p, Sec62p, and Sec72p	476.9	0.0700246	0.138155	0.506721	0.612351	0.77782
YBR172C	SMY2	protein_coding	II	GYF domain protein; involved in COPII vesicle formation; interacts with the Sec23p/Sec24p subcomplex; overexpression suppresses the temperature sensitivity of a myo2 mutant; similar to S. pombe Mpd2; SMY2 has a paralog, SYH1, that arose from the whole genome duplication	1014.43	-0.127711	0.13821	-0.924026	0.355473	0.564586
YBR173C	UMP1	protein_coding	II	Chaperone required for correct maturation of the 20S proteasome; short-lived chaperone; may inhibit premature dimerization of proteasome half-mers; degraded by proteasome upon completion of its assembly	411.178	0.199453	0.143437	1.39079	0.164288	0.353387
YBR174C		protein_coding	II	Dubious open reading frame; unlikely to encode a functional protein, based on available experimental and comparative sequence data; partially overlaps the verified ORF YBR175W; null mutant is viable and sporulation defective	2.94851	-0.476923	0.742251	-0.670788	0.502356
YBR175W	SWD3	protein_coding	II	Essential subunit of the COMPASS (Set1C) complex; COMPASS methylates histone H3 on lysine 4 and is required in transcriptional silencing near telomeres; WD40 beta propeller superfamily member and ortholog of mammalian WDR5	290.652	0.649396	0.145414	4.46472	8.01738e-06	0.000284386
YBR176W	ECM31	protein_coding	II	Ketopantoate hydroxymethyltransferase; required for pantothenic acid biosynthesis, converts 2-oxoisovalerate into 2-dehydropantoate	180.06	-0.228168	0.133323	-1.71163	0.086965	0.231457
YBR177C	EHT1	protein_coding	II	Acyl-coenzymeA:ethanol O-acyltransferase; plays a minor role in medium-chain fatty acid ethyl ester biosynthesis; possesses short-chain esterase activity; localizes to lipid particles and the mitochondrial outer membrane; EHT1 has a paralog, EEB1, that arose from the whole genome duplication	1793.91	0.415085	0.232797	1.78252	0.0746645	0.210815
YBR178W		protein_coding	II	Dubious open reading frame; unlikely to encode a functional protein, based on available experimental and comparative sequence data; partially overlaps the verified gene YBR177C	2.50193	0.0316681	0.738477	0.0710017	0.943396
YBR179C	FZO1	protein_coding	II	Mitofusin; integral membrane protein involved in mitochondrial outer membrane tethering and fusion; role in mitochondrial genome maintenance; efficient tethering and degradation of Fzo1p requires an intact N-terminal GTPase domain; targeted for destruction by the ubiquitin ligase SCF-Mdm30p and the cytosolic ubiquitin-proteasome system	605.717	0.0795693	0.0909603	0.875372	0.381372	0.591265
YBR180W	DTR1	protein_coding	II	Putative dityrosine transporter of the major facilitator superfamily; member of the 12-spanner drug:H(+) antiporter DHA1 family; required for spore wall synthesis; sequence similarity to QDR1 and QDR3, and the triple mutant dtr1 qdr1 qdr3 exhibits reduced dityrosine fluorescence relative to the single mutants; expressed during sporulation	17.1026	2.0606	0.505175	3.8501	0.000118069	0.00228562
YBR181C	RPS6B	protein_coding	II	Protein component of the small (40S) ribosomal subunit; homologous to mammalian ribosomal protein S6, no bacterial homolog; RPS6B has a paralog, RPS6A, that arose from the whole genome duplication	2254.26	-0.607124	0.229115	-2.64884	0.00807698	0.0469408
YBR182C	SMP1	protein_coding	II	MADS-box transcription factor involved in osmotic stress response; SMP1 has a paralog, RLM1, that arose from the whole genome duplication	482.368	0.95048	0.215626	4.41048	1.0314e-05	0.000344097
YBR182C-A		protein_coding	II	Putative protein of unknown function; identified by gene-trapping, microarray-based expression analysis, and genome-wide homology searching	7.08988	0.194691	0.581409	0.337457	0.735773	0.862852
YBR183W	YPC1	protein_coding	II	Alkaline ceramidase; also has reverse (CoA-independent) ceramide synthase activity; catalyzes both breakdown and synthesis of phytoceramide; overexpression confers fumonisin B1 resistance; YPC1 has a paralog, YDC1, that arose from the whole genome duplication	458.555	0.52762	0.215072	2.45362	0.0141428	0.0687963
YBR184W		protein_coding	II	Putative protein of unknown function; YBR184W is not an essential gene	67.1569	0.650309	0.26675	2.43413	0.0149277	0.0715323
YBR185C	MBA1	protein_coding	II	Membrane-associated mitochondrial ribosome receptor; forms a complex with Mdm38p that may facilitate recruitment of mRNA-specific translational activators to ribosomes; possible role in protein export from the matrix to inner membrane	201.928	-0.791297	0.169116	-4.67919	2.88006e-06	0.000127883
YBR186W	PCH2	protein_coding	II	Hexameric ring ATPase that remodels chromosome axis protein Hop1p; nucleolar component of the pachytene checkpoint, which prevents chromosome segregation when recombination and chromosome synapsis are defective; also represses meiotic interhomolog recombination in rDNA; required for meiotic double-stranded break formation	17.8614	0.385549	0.532409	0.743701	0.457057	0.66173
YBR187W	GDT1	protein_coding	II	Protein of unknown function involved in calcium homeostasis; localizes to the cis- and medial-Golgi apparatus; GFP-fusion protein localizes to the vacuole; TMEM165, a human gene which causes Congenital Disorders of Glycosylation is orthologous and functionally complements the null allele; expression pattern and physical interactions suggest a possible role in ribosome biogenesis; expression reduc…	421.113	-0.489013	0.132607	-3.68746	0.000226505	0.00365965
YBR188C	NTC20	protein_coding	II	Member of the NineTeen Complex (NTC); this complex contains Prp19p and stabilizes U6 snRNA in catalytic forms of the spliceosome containing U2, U5, and U6 snRNAs	112.454	0.0459487	0.187452	0.245738	0.805885	0.904261
YBR189W	RPS9B	protein_coding	II	Protein component of the small (40S) ribosomal subunit; homologous to mammalian ribosomal protein S9 and bacterial S4; RPS9B has a paralog, RPS9A, that arose from the whole genome duplication	7954.34	-0.582882	0.229264	-2.54134	0.0110427	0.0580096
YBR190W		protein_coding	II	Dubious open reading frame; unlikely to encode a functional protein, based on available experimental and comparative sequence data; partially overlaps the verified ribosomal protein gene RPL21A/YBR191W	7.32141	0.657988	0.667017	1.14289	0.253086	0.456846
YBR191W	RPL21A	protein_coding	II	Ribosomal 60S subunit protein L21A; homologous to mammalian ribosomal protein L21, no bacterial homolog; RPL21A has a paralog, RPL21B, that arose from the whole genome duplication	4890.05	-0.496614	0.208237	-2.38432	0.0171107	0.0784462
YBR191W-A		protein_coding	II	Dubious open reading frame; unlikely to encode a functional protein, based on available experimental and comparative sequence data	583.188	-0.606612	0.256854	-2.35902	0.0183233	0.0821002
YBR192W	RIM2	protein_coding	II	Mitochondrial pyrimidine nucleotide transporter; imports pyrimidine nucleoside triphosphates and exports pyrimidine nucleoside monophosphates; member of the mitochondrial carrier family	233.848	-0.307628	0.147977	-2.07911	0.0376077	0.132108
YBR193C	MED8	protein_coding	II	Subunit of the RNA polymerase II mediator complex; associates with core polymerase subunits to form the RNA polymerase II holoenzyme; essential for transcriptional regulation	145.698	0.287007	0.158549	1.80966	0.0703485	0.203083
YBR194W	AIM4	protein_coding	II	Protein proposed to be associated with the nuclear pore complex; null mutant is viable, displays elevated frequency of mitochondrial genome loss and is sensitive to freeze-thaw stress	68.0512	-0.00737776	0.221886	-0.0331807	0.97353	0.989238
YBR195C	MSI1	protein_coding	II	Subunit of chromatin assembly factor I (CAF-1); chromatin assembly by CAF-1 affects multiple processes including silencing at telomeres, mating type loci, and rDNA; maintenance of kinetochore structure; deactivation of DNA damage checkpoint after DNA repair; chromatin dynamics during transcription; and repression of divergent noncoding transcription; Msi1p localizes to nucleus and cytoplasm and i…	215.336	-0.0535137	0.137752	-0.389391	0.696987	0.835464
YBR196C	PGI1	protein_coding	II	Glycolytic enzyme phosphoglucose isomerase; catalyzes the interconversion of glucose-6-phosphate and fructose-6-phosphate; required for cell cycle progression and completion of the gluconeogenic events of sporulation	12969.5	-0.477053	0.154406	-3.08942	0.00200549	0.017708
YBR196C-A		protein_coding	II	Putative protein of unknown function; identified by fungal homology and RT-PCR	13.3659	-0.346003	0.497561	-0.70519	0.480692	0.680622
YBR196C-B		protein_coding	II	Putative protein of unknown function; identified by expression profiling and mass spectrometry	9.66433	-0.512544	0.467491	-1.09457	0.273704	0.478963
YBR197C		protein_coding	II	Protein of unknown function; green fluorescent protein (GFP)-fusion protein localizes to the cytoplasm and nucleus; YBR197C is not an essential gene; relative distribution to the nucleus increases upon DNA replication stress; YBR197C has a paralog, YPL077C, that arose from the whole genome duplication	164.345	-0.556117	0.195429	-2.84488	0.00444284	0.0306725
YBR198C	TAF5	protein_coding	II	Subunit (90 kDa) of TFIID and SAGA complexes; involved in RNA polymerase II transcription initiation and in chromatin modification	869.226	-0.159887	0.0830277	-1.92558	0.0541563	0.170276
YBR199W	KTR4	protein_coding	II	Putative mannosyltransferase involved in protein glycosylation; member of the KRE2/MNT1 mannosyltransferase family of type II membrane proteins with a short cytoplasmic N-terminus, a membrane-spanning region and a highly conserved catalytic lumenal domain	1141.28	-0.118047	0.0812891	-1.45207	0.146481	0.327967
YBR200W	BEM1	protein_coding	II	Protein containing SH3-domains; involved in establishing cell polarity and morphogenesis; functions as a scaffold protein for complexes that include Cdc24p, Ste5p, Ste20p, and Rsr1p	425.27	-0.248809	0.123451	-2.01553	0.0438494	0.147648
YBR201C-A		protein_coding	II	Putative protein of unknown function	26.9183	0.549446	0.330054	1.66522	0.0958681	0.247231
YBR201W	DER1	protein_coding	II	ER membrane protein that promotes export of misfolded polypeptides; required for ER-associated protein degradation of misfolded or unassembled proteins; initiates export of aberrant polypeptides from ER lumen by threading them into the ER membrane and routing them to Hrd1p for ubiquitylation; N- and C- termini protrude into the cytoplasm; similar to Dfm1p; homolog of mammalian derlin-1	157.264	-0.329895	0.195207	-1.68959	0.0911056	0.238365
YBR202W	MCM7	protein_coding	II	Component of the Mcm2-7 hexameric helicase complex; MCM2-7 primes origins of DNA replication in G1 and becomes an active ATP-dependent helicase that promotes DNA melting and elongation in S-phase; forms an Mcm4p-6p-7p subcomplex	1045.78	-0.114006	0.105484	-1.08078	0.279796	0.485191
YBR203W	COS111	protein_coding	II	Protein required for antifungal drug ciclopirox olamine resistance; not related to the subtelomerically-encoded COS family; the authentic, non-tagged protein is detected in highly purified mitochondria in high-throughput studies	619.572	0.723157	0.191247	3.78247	0.000155283	0.00277799
YBR204C	LDH1	protein_coding	II	Serine hydrolase; exhibits active esterase plus weak triacylglycerol lipase activities; proposed role in lipid homeostasis, regulating phospholipid and non-polar lipid levels and required for mobilization of LD-stored lipids; localizes to the lipid droplet (LD) surface; contains a classical serine containing catalytic triad (GxSxG motif)	205.375	-0.178633	0.159512	-1.12037	0.262556	0.466599
YBR205W	KTR3	protein_coding	II	Putative alpha-1,2-mannosyltransferase; involved in O- and N-linked protein glycosylation; member of the KRE2/MNT1 mannosyltransferase family; Svp26p mediates uptake of Ktr3p into COPII vesicles; relocalizes from nucleus to vacuole upon DNA replication stress	441.937	-0.781502	0.145301	-5.37718	7.56623e-08	6.96997e-06
YBR206W		protein_coding	II	Dubious open reading frame; unlikely to encode a functional protein, based on available experimental and comparative sequence data; partially overlaps the verified gene KTR3	71.438	-0.724808	0.219138	-3.30509	0.000949459	0.0104911
YBR207W	FTH1	protein_coding	II	Putative high affinity iron transporter; involved in transport of intravacuolar stores of iron; forms complex with Fet5p; expression is regulated by iron; proposed to play indirect role in endocytosis; protein abundance increases in response to DNA replication stress	466.182	-0.205427	0.117949	-1.7417	0.0815607	0.221813
YBR208C	DUR1,2	protein_coding	II	Urea amidolyase; contains both urea carboxylase and allophanate hydrolase activities, degrades urea to CO2 and NH3; expression sensitive to nitrogen catabolite repression and induced by allophanate, an intermediate in allantoin degradation; protein abundance increases in response to DNA replication stress	1531.88	1.15761	0.353475	3.2675	0.00108504	0.0116467
YBR210W	ERV15	protein_coding	II	Protein involved in export of proteins from the endoplasmic reticulum; ERV15 has a paralog, ERV14, that arose from the whole genome duplication	202.354	0.280544	0.131633	2.12952	0.0332109	0.122815
YBR211C	AME1	protein_coding	II	Essential kinetochore protein associated with microtubules and SPBs; component of the kinetochore sub-complex COMA (Ctf19p, Okp1p, Mcm21p, Ame1p); involved in spindle checkpoint maintenance; orthologous to human centromere constitutive-associated network (CCAN) subunit CENP-U and fission yeast Mis17; relative distribution to the nucleus increases upon DNA replication stress	258.036	0.0211455	0.128407	0.165543	0.868516	0.934696
YBR212W	NGR1	protein_coding	II	RNA binding protein that negatively regulates growth rate; interacts with the 3' UTR of the mitochondrial porin (POR1) mRNA and enhances its degradation; overexpression impairs mitochondrial function; interacts with Dhh1p to mediate POR1 mRNA decay; expressed in stationary phase	723.262	0.168575	0.119767	1.40909	0.158809	0.345373
YBR213W	MET8	protein_coding	II	Bifunctional dehydrogenase and ferrochelatase; involved in the biosynthesis of siroheme, a prosthetic group used by sulfite reductase; required for sulfate assimilation and methionine biosynthesis	198.362	0.0569145	0.283125	0.205709	0.837018	0.918421
YBR214W	SDS24	protein_coding	II	Protein involved in cell separation during budding; one of two S. cerevisiae homologs (Sds23p and Sds24p) of the S. pombe Sds23 protein, which is implicated in APC/cyclosome regulation; may play an indirect role in fluid-phase endocytosis; protein abundance increases in response to DNA replication stress; SDS24 has a paralog, SDS23, that arose from the whole genome duplication	679.524	0.386761	0.237	1.63259	0.102555	0.258461
YBR215W	HPC2	protein_coding	II	Subunit of the HIR complex; HIR is a nucleosome assembly complex involved in regulation of histone gene transcription; mutants display synthetic defects with subunits of FACT, a complex that allows passage of RNA Pol II through nucleosomes	239.737	-0.00857952	0.137741	-0.0605357	0.951729	0.979338
YBR216C	YBP1	protein_coding	II	Protein involved in cellular response to oxidative stress; required for oxidation of specific cysteine residues of transcription factor Yap1p, resulting in nuclear localization of Yap1p in response to stress; YBP1 has a paralog, YBP2, that arose from the whole genome duplication	447.611	0.123956	0.0985947	1.25735	0.208628	0.407099
YBR217W	ATG12	protein_coding	II	Ubiquitin-like modifier involved in autophagy and the Cvt pathway; conserved; conjugated to Atg5p to form a complex involved in Atg8p lipidation; Atg5p-Atg12p cojugate also forms a complex with Atg16p; the Atg5-Atg12/Atg16 complex binds to membranes and is essential for autophagosome formation	81.6276	-0.0943211	0.23355	-0.402318	0.68745	0.829663
YBR218C	PYC2	protein_coding	II	Pyruvate carboxylase isoform; cytoplasmic enzyme that converts pyruvate to oxaloacetate; differentially regulated than isoform Pyc1p; mutations in the human homolog are associated with lactic acidosis; PYC2 has a paralog, PYC1, that arose from the whole genome duplication	5852.5	0.197803	0.171933	1.15037	0.249992	0.453409
YBR220C		protein_coding	II	Putative protein of unknown function; YBR220C is not an essential gene	277.127	-0.325509	0.146587	-2.22116	0.02634	0.10536
YBR221C	PDB1	protein_coding	II	E1 beta subunit of the pyruvate dehydrogenase (PDH) complex; PDH is an evolutionarily conserved multi-protein complex found in mitochondria	2812.39	-0.025845	0.100766	-0.256617	0.797475	0.898609
YBR222C	PCS60	protein_coding	II	Oxalyl-CoA synthetase; capable of catalyzing conversion of oxalate to oxalyl-CoA; catalyzes first step in pathway of oxalate degradation that functions to protect yeast from inhibitory effects of oxalate; peroxisomal protein that binds mRNA; localizes to both peroxisomal peripheral membrane and matrix, expression is highly inducible by oleic acid; similar to E. coli long chain acyl-CoA synthetase	631.002	-0.14136	0.164735	-0.857787	0.39101	0.600494
YBR223C	TDP1	protein_coding	II	Tyrosyl-DNA phosphodiesterase I; hydrolyzes 3' and 5'-phosphotyrosyl bonds; involved in the repair of DNA lesions created by topoisomerase I and topoisomerase II; mutations in human homolog result in the neurodegenerative disease SCANI	180.799	-0.312672	0.176179	-1.77444	0.0759906	0.213183
YBR224W		protein_coding	II	Dubious open reading frame; unlikely to encode a functional protein, based on available experimental and comparative sequence data; partially overlaps the verified gene TDP1	7.88024	-0.454107	0.579687	-0.782198	0.434098	0.639741
YBR225W		protein_coding	II	Putative protein of unknown function; non-essential gene identified in a screen for mutants affected in mannosylphophorylation of cell wall components	623.223	-0.0170632	0.115539	-0.146036	0.883893	0.941849
YBR226C		protein_coding	II	Dubious open reading frame; unlikely to encode a functional protein, based on available experimental and comparative sequence data; partially overlaps the uncharacterized ORF YBR225W	24.2439	0.0766783	0.36111	0.215266	0.82956	0.914883
YBR227C	MCX1	protein_coding	II	Mitochondrial matrix protein; putative ATP-binding chaperone with non-proteolytic function; similar to bacterial ClpX proteins	400.287	0.1542	0.114798	1.34283	0.179326	0.373223
YBR228W	SLX1	protein_coding	II	Endonuclease involved in DNA recombination and repair; subunit of a complex, with Slx4p, that hydrolyzes 5' branches from duplex DNA in response to stalled or converging replication forks; function overlaps with that of Sgs1p-Top3p	141.632	0.229694	0.226215	1.01462	0.310287	0.516671
YBR229C	ROT2	protein_coding	II	Glucosidase II catalytic subunit; required for normal cell wall synthesis; mutations in rot2 suppress tor2 mutations, and are synthetically lethal with rot1 mutations	1229.71	-0.0673147	0.0966132	-0.696824	0.485913	0.685812
YBR230C	OM14	protein_coding	II	Integral mitochondrial outer membrane protein; abundance is decreased in cells grown in glucose relative to other carbon sources; appears to contain 3 alpha-helical transmembrane segments; ORF encodes a 97-basepair intron	297.714	0.0584244	0.19063	0.306395	0.759304	0.877989
YBR230W-A		protein_coding	II	Putative protein of unknown function; YBR230W-A has a paralog, COQ8, that arose from the whole genome duplication	25.8328	0.312125	0.406037	0.76471	0.444444	0.648949
YBR231C	SWC5	protein_coding	II	Component of the SWR1 complex; complex exchanges histone variant H2AZ (Htz1p) for chromatin-bound histone H2A; protein abundance increases in response to DNA replication stress; relocalizes to the cytosol in response to hypoxia	76.0877	0.270741	0.247816	1.09551	0.273294	0.478516
YBR232C		protein_coding	II	Dubious open reading frame; unlikely to encode a functional protein, based on available experimental and comparative sequence data	2.29752	0.131838	0.749802	0.275879	0.782641
YBR233W	PBP2	protein_coding	II	RNA binding protein; has similarity to mammalian heterogeneous nuclear RNP K protein, involved in the regulation of telomere position effect and telomere length; relative distribution to the nucleus increases upon DNA replication stress	183.259	-0.0711367	0.149379	-0.476414	0.63378	0.792963
YBR233W-A	DAD3	protein_coding	II	Essential subunit of the Dam1 complex (aka DASH complex); complex couples kinetochores to the force produced by MT depolymerization thereby aiding in chromosome segregation; is transferred to the kinetochore prior to mitosis	76.8128	-0.168221	0.277065	-0.607054	0.543815	0.731307
YBR234C	ARC40	protein_coding	II	Subunit of the ARP2/3 complex; ARP2/3 is required for the motility and integrity of cortical actin patches	778.601	-0.0433858	0.106985	-0.406079	0.684684	0.827466
YBR235W	VHC1	protein_coding	II	Vacuolar membrane cation-chloride cotransporter (CCC); likely mediates K+ and Cl- cotransport into the vacuole; has a role in potassium homeostasis and salt tolerance; similar to mammalian electroneutral Na(+)-(K+)-C1- cotransporter family	532.647	0.312858	0.1659	1.88609	0.059283	0.181226
YBR236C	ABD1	protein_coding	II	Methyltransferase; catalyzes the transfer of a methyl group from S-adenosylmethionine to the GpppN terminus of capped mRNA; nuclear protein that relocalizes to the cytosol in response to hypoxia	442.903	0.231715	0.122698	1.88857	0.0589492	0.18053
YBR237W	PRP5	protein_coding	II	RNA helicase in the DEAD-box family; necessary for prespliceosome formation, bridges U1 and U2 snRNPs and enables stable U2 snRNP association with intron RNA	510.563	0.171219	0.123968	1.3834	0.166542	0.356735
YBR238C		protein_coding	II	Mitochondrial membrane protein; not required for respiratory growth but causes a synthetic respiratory defect in combination with rmd9 mutations; transcriptionally up-regulated by TOR; deletion increases life span; YBR238C has a paralog, RMD9, that arose from the whole genome duplication	895.922	-0.109476	0.231845	-0.472226	0.636766	0.794605
YBR239C	ERT1	protein_coding	II	Transcriptional regulator; involved in regulation of gluconeogenesis and fermentable carbon utilization; GFP-fusion protein localizes to cytoplasm, nucleus; null mutation affects periodicity of transcriptional and metabolic oscillation; plays role in restricting Ty1 transposition; member of the zinc cluster family of proteins, similar to Rds2p	216.954	0.14972	0.162188	0.925268	0.354827	0.563994
YBR240C	THI2	protein_coding	II	Transcriptional activator of thiamine biosynthetic genes; interacts with regulatory factor Thi3p to control expression of thiamine biosynthetic genes with respect to thiamine availability; acts together with Pdc2p to respond to thiaminediphosphate demand, possibly as related to carbon source availability; zinc finger protein of the Zn(II)2Cys6 type	113.488	1.05998	0.268759	3.94003	8.14697e-05	0.00171615
YBR241C		protein_coding	II	Putative transporter, member of the sugar porter family; green fluorescent protein (GFP)-fusion protein localizes to the vacuolar membrane; YBR241C is not an essential gene; YBR241C has a paralog, VPS73, that arose from the whole genome duplication	282.95	0.641985	0.158591	4.04517	5.2286e-05	0.00125568
YBR242W		protein_coding	II	Putative protein of unknown function; green fluorescent protein (GFP)-fusion protein localizes to the cytoplasm and nucleus; YBR242W is not an essential gene; YBR242W has a paralog, YGL101W, that arose from the whole genome duplication	287.323	-0.500868	0.140146	-3.57398	0.000351592	0.00517906
YBR243C	ALG7	protein_coding	II	UDP-N-acetyl-glucosamine-1-P transferase; transfers Glc-Nac-P from UDP-GlcNac to Dol-P in the ER in the first step of the dolichol pathway of protein asparagine-linked glycosylation; inhibited by tunicamycin	271.855	-0.0444205	0.12876	-0.346303	0.729115	0.858142
YBR244W	GPX2	protein_coding	II	Phospholipid hydroperoxide glutathione peroxidase; protects cells from phospholipid hydroperoxides and nonphospholipid peroxides during oxidative stress; induced by glucose starvation; protein abundance increases in response to DNA replication stress	218.216	-0.44129	0.16053	-2.74878	0.00598176	0.0379439
YBR245C	ISW1	protein_coding	II	ATPase subunit of imitation-switch (ISWI) class chromatin remodelers; with Ioc3p forms Isw1a complex involved in repression of transcription initiation; with Ioc2p and Ioc4p forms Isw1b complex involved in regulation of transcription elongation; Isw1b recruited to ORFs by H3K36 methylation and acts with Chd1p to prevent trans-histone exchange over coding regions; Isw1p import into nucleus depends…	1074.96	-0.121598	0.0962782	-1.26306	0.206567	0.40474
YBR246W	RRT2	protein_coding	II	Methylesterase performing penultimate step of diphthamide biosynthesis; hydrolyzes methylated diphthine to produce diphthine and allows Dph6-catalyzed amidation reaction to occur; deletion leads to resistance to sordarin and accumulation of methylatediphthine; WD40 domain-containing protein; involved in endosomal recycling; forms complex with Rtt10p that functions in retromer-mediated pathway for…	385.868	-0.101686	0.107038	-0.950597	0.341809	0.551704
YBR247C	ENP1	protein_coding	II	Protein associated with U3 and U14 snoRNAs; required for pre-rRNA processing and 40S ribosomal subunit synthesis; localized in the nucleus and concentrated in the nucleolus	613.131	-0.539327	0.194683	-2.77022	0.0056018	0.0363069
YBR248C	HIS7	protein_coding	II	Imidazole glycerol phosphate synthase; glutamine amidotransferase:cyclase that catalyzes the fifth step of histidine biosynthesis and also produces 5-aminoimidazole-4-carboxamide ribotide (AICAR), a purine precursor	1773.41	0.623101	0.359195	1.73468	0.0827978	0.22359
YBR249C	ARO4	protein_coding	II	3-deoxy-D-arabino-heptulosonate-7-phosphate (DAHP) synthase; catalyzes the first step in aromatic amino acid biosynthesis and is feedback-inhibited by tyrosine or high concentrations of phenylalanine or tryptophan; relative distribution to the nucleus increases upon DNA replication stress	3755.39	-0.256345	0.195194	-1.31325	0.1891	0.384302
YBR250W	SPO23	protein_coding	II	Protein of unknown function; associates with meiosis-specific protein Spo1p	46.2508	0.872105	0.425496	2.06699	0.0387354	0.134918
YBR251W	MRPS5	protein_coding	II	Mitochondrial ribosomal protein of the small subunit	329.443	-0.388091	0.134609	-2.88316	0.00393705	0.0280919
YBR252W	DUT1	protein_coding	II	deoxyuridine triphosphate diphosphatase (dUTPase); catalyzes hydrolysis of dUTP to dUMP and PPi, thereby preventing incorporation of uracil into DNA during replication; critical for the maintenance of genetic stability; also has diphosphatase activity on deoxyinosine triphosphate	223.295	-0.914847	0.178864	-5.11217	3.18485e-07	2.11736e-05
YBR253W	SRB6	protein_coding	II	Subunit of the RNA polymerase II mediator complex; associates with core polymerase subunits to form the RNA polymerase II holoenzyme; essential for transcriptional regulation	203.381	0.336908	0.182602	1.84561	0.0649485	0.192835
YBR254C	TRS20	protein_coding	II	Core component of transport protein particle (TRAPP) complexes I-III; TRAPP complexes are related multimeric guanine nucleotide-exchange factors for the GTPase Ypt1p, regulating ER-Golgi traffic (TRAPPI), intra-Golgi traffic (TRAPPII), endosome-Golgi traffic (TRAPPII and III) and autophagy (TRAPPIII); mutation of conserved residues leads to defects in endocytic recycling and a block in sporulatio…	235.809	0.27677	0.159523	1.73438	0.0828514	0.22359
YBR255C-A		protein_coding	II	Putative protein of unknown function; may interact with respiratory chain complexes III (ubiquinol-cytochrome c reductase) or IV (cytochrome c oxidase); identified by sequence comparison with hemiascomycetous yeast species	51.2534	-0.484163	0.214601	-2.25574	0.0240868	0.0990429
YBR255W	MTC4	protein_coding	II	Protein of unknown function; required for normal growth rate at 15 degrees C; green fluorescent protein (GFP)-fusion protein localizes to the cytoplasm in a punctate pattern; mtc4 is synthetically sick with cdc13-1	340.04	0.448221	0.197385	2.27324	0.0230115	0.0959151
YBR256C	RIB5	protein_coding	II	Riboflavin synthase; catalyzes the last step of the riboflavin biosynthesis pathway	2334.96	1.0364	0.371089	2.7946	0.00519635	0.0344488
YBR257W	POP4	protein_coding	II	Subunit of both RNase MRP and nuclear RNase P; RNase MRP cleaves pre-rRNA, while nuclear RNase P cleaves tRNA precursors to generate mature 5' ends and facilitates turnover of nuclear RNAs; binds to the RPR1 RNA subunit in RNase P	257.305	0.358058	0.151734	2.36022	0.0182641	0.0820188
YBR258C	SHG1	protein_coding	II	Subunit of the COMPASS (Set1C) complex; COMPASS methylates histone H3 on lysine 4 and is required in transcriptional silencing near telomeres	42.1505	0.083635	0.286382	0.297032	0.766442	0.882059
YBR259W		protein_coding	II	Protein of unknown function; YBR259W is not an essential gene; forms cytoplasmic foci upon DNA replication stress	303.463	0.130802	0.126154	1.0377	0.299412	0.507126
YBR260C	RGD1	protein_coding	II	GTPase-activating protein (RhoGAP) for Rho3p and Rho4p; possibly involved in control of actin cytoskeleton organization	516.833	-0.182381	0.0912041	-1.99968	0.0455351	0.152244
YBR261C	TAE1	protein_coding	II	AdoMet-dependent proline methyltransferase; catalyzes the dimethylation of ribosomal proteins Rpl12 and Rps25 at N-terminal proline residues; has a role in protein synthesis; fusion protein localizes to the cytoplasm	303.285	0.123182	0.135514	0.908046	0.363854	0.573177
YBR262C	MIC12	protein_coding	II	Component of the MICOS complex; MICOS (formerly MINOS or MitOS) is a mitochondrial inner membrane complex that extends into the intermembrane space and has a role in the maintenance of crista junctions, inner membrane architecture, and formation of contact sites to the outer membrane	238.748	-0.270865	0.152459	-1.77576	0.0757732	0.212869
YBR263W	SHM1	protein_coding	II	Mitochondrial serine hydroxymethyltransferase; converts serine to glycine plus 5,10 methylenetetrahydrofolate; involved in generating precursors for purine, pyrimidine, amino acid, and lipid biosynthesis; reverse reaction generates serine	2074.09	-0.3058	0.110282	-2.77289	0.00555603	0.0360966
YBR264C	YPT10	protein_coding	II	Rab family GTP-binding protein; contains the PEST signal sequence specific for proteolytic enzymes; may be involved in vesicular transport; overexpression leads to accumulation of Golgi-like cisternae with budding vesicles	117.901	-0.0338685	0.158308	-0.215826	0.829124	0.914793
YBR265W	TSC10	protein_coding	II	3-ketosphinganine reductase; catalyzes the second step in phytosphingosine synthesis; essential for growth in the absence of exogenous dihydrosphingosine or phytosphingosine; localized to lipid droplets; member of short chain dehydrogenase/reductase protein family	409.286	-0.296386	0.113088	-2.62119	0.00876242	0.0497074
YBR267W	REI1	protein_coding	II	Cytoplasmic pre-60S factor; required for the correct recycling of shuttling factors Alb1, Arx1 and Tif6 at the end of the ribosomal large subunit biogenesis; involved in bud growth in the mitotic signaling network	426.583	-0.651391	0.211091	-3.08578	0.00203019	0.0178161
YBR268W	MRPL37	protein_coding	II	Mitochondrial ribosomal protein of the large subunit	98.5181	0.00626057	0.204938	0.0281814	0.977517	0.991005
YBR269C	SDH8	protein_coding	II	Protein required for assembly of succinate dehydrogenase; interacts with flavinylated Sdh1p and may function as a chaperone for free Sdh1p, protecting its FAD cofactor from redox reactions before assembly of the complex; soluble protein of the mitochondrial matrix; respiratory defect of null mutant is functionally complemented by Drosophila and human orthologs	244.951	-0.0268578	0.155064	-0.172341	0.863169	0.93203
YBR270C	BIT2	protein_coding	II	Subunit of TORC2 membrane-associated complex; involved in regulation of actin cytoskeletal dynamics during polarized growth and cell wall integrity; interacts with Slm1p and Slm2p, homologous PH domain-containing TORC2 substrates; BIT2 has a paralog, BIT61, that arose from the whole genome duplication	130.089	0.175176	0.214906	0.821018	0.411636	0.61939
YBR271W	EFM2	protein_coding	II	S-adenosylmethionine-dependent methyltransferase; seven-beta-strand lysine methyltransferase which dimethylates translation elongation factor EF2 (Eft1p and Eft2p) at lysine 613 and methylates EF3 (Yef3p) at lysine 187; green fluorescent protein (GFP)-fusion protein localizes to the cytoplasm; involved in regulation of translational termination; predicted involvement in ribosome biogenesis	248.363	-0.180969	0.188624	-0.959906	0.337103	0.546662
YBR272C	HSM3	protein_coding	II	Proteasome-interacting protein; involved in the assembly of the base subcomplex of the 19S proteasomal regulatory particle (RP); involved in DNA mismatch repair during slow growth; weak similarity to Msh1p; related to human 19S subunit S5b; structural study suggests Hsm3p is a scaffold protein for Rpt1p-Rpt2p complex formation	229.038	0.362913	0.155077	2.33898	0.0193366	0.0854418
YBR273C	UBX7	protein_coding	II	UBX (ubiquitin regulatory X) domain-containing protein; interacts with Cdc48p; UBX7 has a paralog, UBX6, that arose from the whole genome duplication	454.687	-0.0674819	0.130246	-0.51786	0.604556	0.77253
YBR274W	CHK1	protein_coding	II	Serine/threonine kinase and DNA damage checkpoint effector; mediates cell cycle arrest via phosphorylation of Pds1p; phosphorylated by checkpoint signal transducer Mec1p; homolog of S. pombe and mammalian Chk1 checkpoint kinase	334.231	0.0686046	0.11012	0.622972	0.533303	0.722623
YBR275C	RIF1	protein_coding	II	Protein that binds to the Rap1p C-terminus; acts synergistically with Rif2p to help control telomere length and establish telomeric silencing; contributes to resection of DNA double strand breaks (DSBs); deletion results in telomere elongation	1032.04	0.119459	0.0975664	1.22445	0.220781	0.421616
YBR276C	PPS1	protein_coding	II	Protein phosphatase; has specificity for serine, threonine, and tyrosine residues; has a role in the DNA synthesis phase of the cell cycle	670.187	-0.0366797	0.089704	-0.409417	0.682234	0.825313
YBR277C		protein_coding	II	Dubious open reading frame; unlikely to encode a functional protein, based on available experimental and comparative sequence data; partially overlaps the verified gene YBR278W	3.40197	0.930069	0.6713	1.32136	0.186382	0.381795
YBR278W	DPB3	protein_coding	II	Third-largest subunit of DNA polymerase II (DNA polymerase epsilon); required to maintain fidelity of chromosomal replication and also for inheritance of telomeric silencing; stabilizes the interaction of Pol epsilon with primer-template DNA, positively affecting the processivity of the polymerase and exonuclease activities of Pol epsilon; mRNA abundance peaks at the G1/S boundary of the cell cyc…	104.599	0.0747118	0.205648	0.361586	0.717662	0.849848
YBR279W	PAF1	protein_coding	II	Component of the Paf1p complex involved in transcription elongation; binds to and modulates the activity of RNA polymerases I and II; required for expression of a subset of genes, including cell cycle-regulated genes; involved in SER3 repression by helping to maintain SRG1 transcription-dependent nucleosome occupancy; homolog of human PD2/hPAF1	674.629	-0.0174912	0.090687	-0.192776	0.847134	0.92374
YBR280C	SAF1	protein_coding	II	F-Box protein involved in proteasome-dependent degradation of Aah1p; involved in proteasome-dependent degradation of Aah1p during entry of cells into quiescence; interacts with Skp1	209.06	-0.0535175	0.184828	-0.288679	0.772827	0.886267
YBR281C	DUG2	protein_coding	II	Component of glutamine amidotransferase (GATase II); forms a complex with Dug3p to degrade glutathione (GSH) and other peptides containing a gamma-glu-X bond in an alternative pathway to GSH degradation by gamma-glutamyl transpeptidase (Ecm38p)	622.266	-0.516463	0.132666	-3.89333	9.88757e-05	0.00198137
YBR282W	MRPL27	protein_coding	II	Mitochondrial ribosomal protein of the large subunit; homolog of human Bcl-2 interacting protein BMRP	170.618	-0.172702	0.169539	-1.01862	0.308382	0.515809
YBR283C	SSH1	protein_coding	II	Subunit of the Ssh1 translocon complex; Sec61p homolog involved in co-translational pathway of protein translocation; not essential	2038.11	-0.229808	0.141551	-1.62347	0.104488	0.262049
YBR284W		protein_coding	II	Putative metallo-dependent hydrolase superfamily protein; similar to AMP deaminases but lacks key catalytic residues and does not rescue purine nucleotide metabolic defect of quadruple aah1 ade8 amd1 his1 mutant; null mutant exhibits longer telomeres, altered Ty mobility, decreased resistance to rapamycin and wortmannin; induced in response to hydrostatic pressure; not an essential gene; YBR284W …	104.51	0.150879	0.333464	0.458735	0.646424	0.802117
YBR285W		protein_coding	II	Putative protein of unknown function; YBR285W is not an essential gene	28.8167	-0.096367	0.415727	-0.232059	0.816492	0.909872
YBR286W	APE3	protein_coding	II	Vacuolar aminopeptidase Y; processed to mature form by Prb1p	4921.58	0.00148439	0.169241	0.00875016	0.993018	0.996733
YBR287W		protein_coding	II	Protein of unknown function; green fluorescent protein (GFP)-fusion protein localizes to the ER; YBR287W is not an essential gene	1627.96	0.286875	0.128984	2.22405	0.026145	0.104744
YBR288C	APM3	protein_coding	II	Mu3-like subunit of the clathrin associated protein complex (AP-3); functions in transport of alkaline phosphatase to the vacuole via the alternate pathway	547.174	-0.27263	0.132344	-2.06012	0.0393875	0.136803
YBR289W	SNF5	protein_coding	II	Subunit of the SWI/SNF chromatin remodeling complex; involved in transcriptional regulation; functions interdependently in transcriptional activation with Snf2p and Snf6p; relocates to the cytosol under hypoxic conditions	591.575	0.166786	0.105294	1.58552	0.112848	0.275949
YBR290W	BSD2	protein_coding	II	Heavy metal ion homeostasis protein; facilitates trafficking of Smf1p and Smf2p metal transporters to vacuole where they are degraded; acts as an adaptor protein with Rsp5p in the regulated endocytosis of Smf1p and is itself ubiquitylated by Rsp5p; controls metal ion transport, prevents metal hyperaccumulation, functions in copper detoxification	424.617	0.328498	0.121868	2.69819	0.00697177	0.0421492
YBR291C	CTP1	protein_coding	II	Mitochondrial inner membrane citrate transporter; member of the mitochondrial carrier family	130.101	-0.0289858	0.220404	-0.128035	0.898121	0.950644
YBR292C		protein_coding	II	Dubious open reading frame; unlikely to encode a functional protein, based on available experimental and comparative sequence data; YBR292C is not an essential gene	11.3769	0.275365	0.510404	0.546181	0.584942	0.758777
YBR293W	VBA2	protein_coding	II	Permease of basic amino acids in the vacuolar membrane	338.524	0.544361	0.246526	2.21017	0.0270935	0.107458
YBR294W	SUL1	protein_coding	II	High affinity sulfate permease of the SulP anion transporter family; sulfate uptake is mediated by specific sulfate transporters Sul1p and Sul2p, which control the concentration of endogenous activated sulfate intermediates	789.661	0.521805	0.631934	1.05014	0.293652	0.500945
YBR295W	PCA1	protein_coding	II	Cadmium transporting P-type ATPase; may also have a role in copper and iron homeostasis; stabilized by Cd binding, which prevents ubiquitination; S288C and other lab strains contain a G970R mutation which eliminates Cd transport function	472.524	0.386611	0.21541	1.79721	0.0723025	0.206369
YBR296C	PHO89	protein_coding	II	Plasma membrane Na+/Pi cotransporter; active in early growth phase; similar to phosphate transporters of Neurospora crassa; transcription regulated by inorganic phosphate concentrations and Pho4p; mutations in related human transporter genes hPit1 and hPit2 are associated with hyperphosphatemia-induced calcification of vascular tissue and familial idiopathic basal ganglia calcification	26.5303	0.993272	0.52346	1.92562	0.0541524	0.170276
YBR297W	MAL33	protein_coding	II	MAL-activator protein; part of complex locus MAL3; nonfunctional in genomic reference strain S288C	195.947	0.967963	0.259405	3.74044	0.0001837	0.00313204
YBR298C	MAL31	protein_coding	II	Maltose permease; high-affinity maltose transporter (alpha-glucoside transporter); encoded in the MAL3 complex locus; member of the 12 transmembrane domain superfamily of sugar transporters; functional in genomic reference strain S288C	151.482	0.0130429	0.29048	0.0447137	0.964336	0.984909
YBR299W	MAL32	protein_coding	II	Maltase (alpha-D-glucosidase); inducible protein involved in maltose catabolism; encoded in the MAL3 complex locus; functional in genomic reference strain S288C; hydrolyzes the disaccharides maltose, turanose, maltotriose, and sucrose	5.32273	0.0232698	0.618946	0.0524664	0.958157	0.983166
YBR301W	PAU24	protein_coding	II	Cell wall mannoprotein; has similarity to Tir1p, Tir2p, Tir3p, and Tir4p; member of the seripauperin multigene family encoded mainly in subtelomeric regions; expressed under anaerobic conditions, completely repressed during aerobic growth	2.56377	0.55225	0.73507	0.815994	0.414503
YCL001W	RER1	protein_coding	III	Protein involved in retention of membrane proteins; including Sec12p, in the ER; localized to Golgi; functions as a retrieval receptor in returning membrane proteins to the ER	641.402	-0.396936	0.159189	-2.49353	0.0126481	0.0633634
YCL001W-A		protein_coding	III	Putative protein of unknown function; YCL001W-A gene has similarity to DOM34 and is present in a region duplicated between chromosomes XIV and III	9.63429	-0.074748	0.476249	-0.160337	0.872616	0.935845
YCL001W-B		protein_coding	III	Putative protein of unknown function; present in a region duplicated between chromosomes XIV and III; YCL001W-B has a paralog, DOM34, that arose from the whole genome duplication	6.65062	-0.331519	0.508863	-0.653651	0.513337	0.706582
YCL002C		protein_coding	III	Putative protein of unknown function; YCL002C is not an essential gene	288.917	-0.146338	0.144514	-1.01328	0.310929	0.517265
YCL004W	PGS1	protein_coding	III	Phosphatidylglycerolphosphate synthase; catalyzes the synthesis of phosphatidylglycerolphosphate from CDP-diacylglycerol and sn-glycerol 3-phosphate in the first committed and rate-limiting step of cardiolipin biosynthesis	177.593	0.396774	0.154544	2.56819	0.0102232	0.0550938
YCL005W	LDB16	protein_coding	III	Protein of unknown function; null mutants have decreased net negative cell surface charge; GFP-fusion protein expression is induced in response to the DNA-damaging agent MMS; native protein is detected in purified mitochondria	163.144	-0.136491	0.188016	-0.726009	0.467833	0.669957
YCL005W-A	VMA9	protein_coding	III	Vacuolar H+ ATPase subunit e of the V-ATPase V0 subcomplex; essential for vacuolar acidification; interacts with the V-ATPase assembly factor Vma21p in the ER; involved in V0 biogenesis	275.126	-0.325846	0.151895	-2.1457	0.0318973	0.119243
YCL007C		protein_coding	III	Dubious open reading frame; unlikely to encode a functional protein, based on available experimental and comparative sequence data; overlaps verified ORF YCL005W-A; mutations in YCL007C were thought to confer sensitivity to calcofluor white, but this phenotype was later shown to be due to the defect in YCL005W-A	5.34694	0.345405	0.630402	0.575995	0.564619	0.745345
YCL008C	STP22	protein_coding	III	Component of the ESCRT-I complex; ESCRT-I is involved in ubiquitin-dependent sorting of proteins into the endosome; prevents polyubiquitination of the arrestin-related protein Rim8p, thereby directing its monoubiquitination by Rsp5p; homologous to the mouse and human Tsg101 tumor susceptibility gene; mutants exhibit a Class E Vps phenotype;	239.374	-0.102233	0.232078	-0.440421	0.659632	0.812124
YCL009C	ILV6	protein_coding	III	Regulatory subunit of acetolactate synthase; acetolactate synthase catalyzes the first step of branched-chain amino acid biosynthesis; enhances activity of the Ilv2p catalytic subunit, localizes to mitochondria	3866.62	0.0463465	0.223634	0.207149	0.835894	0.917506
YCL010C	SGF29	protein_coding	III	Component of the HAT/Core module of the SAGA, SLIK, and ADA complexes; HAT/Core module also contains Gcn5p, Ngg1p, and Ada2p; binds methylated histone H3K4; involved in transcriptional regulation through SAGA and TBP recruitment to target promoters and H3 acetylation	331.896	0.295913	0.185513	1.59469	0.110782	0.272408
YCL011C	GBP2	protein_coding	III	Poly(A+) RNA-binding protein; key surveillance factor for the selective export of spliced mRNAs from the nucleus to the cytoplasm; preference for intron-containing genes; similar to Npl3p; also binds single-stranded telomeric repeat sequence in vitro; relocalizes to the cytosol in response to hypoxia; GBP2 has a paralog, HRB1, that arose from the whole genome duplication	1060.52	-0.0704189	0.0975145	-0.722299	0.470111	0.671407
YCL012C		protein_coding	III	Putative protein of unknown function; orthologs are present in S. bayanus, S. paradoxus and Ashbya gossypii; YCL012C is not an essential gene	190.762	0.0679065	0.251583	0.271193	0.786243	0.893846
YCL014W	BUD3	protein_coding	III	Protein involved in bud-site selection; required for axial budding pattern; localizes with septins to bud neck in mitosis and may constitute an axial landmark for next round of budding	1065.45	0.173301	0.117207	1.47867	0.139229	0.318676
YCL016C	DCC1	protein_coding	III	Subunit of a complex with Ctf8p and Ctf18p; shares some components with Replication Factor C; required for sister chromatid cohesion and telomere length maintenance	206.738	0.179948	0.216985	0.830683	0.406153	0.614389
YCL017C	NFS1	protein_coding	III	Cysteine desulfurase; involved in iron-sulfur cluster (Fe/S) biogenesis and in thio-modification of mitochondrial and cytoplasmic tRNAs; essential protein located predominantly in mitochondria	1230.15	0.224037	0.135418	1.6543	0.0980671	0.251672
YCL018W	LEU2	protein_coding	III	Beta-isopropylmalate dehydrogenase (IMDH); catalyzes the third step in the leucine biosynthesis pathway; can additionally catalyze the conversion of &#946;-ethylmalate into &#945;-ketovalerate	1320.11	7.27929	0.462723	8.74331	2.26379e-18	1.39721e-15
YCL019W		protein_coding	III	Retrotransposon TYA Gag and TYB Pol genes; transcribed/translated as one unit; polyprotein is processed to make a nucleocapsid-like protein (Gag), reverse transcriptase (RT), protease (PR), and integrase (IN); similar to retroviral genes	26.8627	5.43537	0.577596	6.43505	1.23434e-10	2.56825e-08
YCL021W-A		protein_coding	III	Putative protein of unknown function	181.862	0.796119	0.26442	3.00706	0.00263787	0.0210893
YCL022C		protein_coding	III	Dubious open reading frame; unlikely to encode a functional protein, based on available experimental and comparative sequence data; completely overlaps verified gene KCC4/YCL024W	2.95296	-0.0450677	0.750819	0.0354007	0.97176
YCL024W	KCC4	protein_coding	III	Protein kinase of the bud neck involved in the septin checkpoint; associates with septin proteins, negatively regulates Swe1p by phosphorylation, shows structural homology to bud neck kinases Gin4p and Hsl1p; KCC4 has a paralog, GIN4, that arose from the whole genome duplication	365.007	-0.601142	0.208021	-2.88937	0.0038601	0.0276804
YCL025C	AGP1	protein_coding	III	Low-affinity amino acid permease with broad substrate range; involved in uptake of asparagine, glutamine, and other amino acids; expression regulated by SPS plasma membrane amino acid sensor system (Ssy1p-Ptr3p-Ssy5p); AGP1 has a paralog, GNP1, that arose from the whole genome duplication	3812.57	0.445966	0.307573	1.45039	0.14695	0.328496
YCL026C-A	FRM2	protein_coding	III	Type II nitroreductase, using NADH as reductant; mutants are defective in fatty acid mediated repression of genes involved in fatty acid biosynthesis indicative of a role in lipid signaling; involved in the oxidative stress response; transcription induction by cadmium and selenite indicates a possible role in the metal stress response; expression induced in cells treated with the mycotoxin patulin	24.2009	1.99125	0.558225	3.50763	0.000452125	0.006133
YCL026C-B	HBN1	protein_coding	III	Protein of unknown function; similar to bacterial nitroreductases; green fluorescent protein (GFP)-fusion protein localizes to the cytoplasm and nucleus; protein becomes insoluble upon intracellular iron depletion; protein abundance increases in response to DNA replication stress	136.401	-0.281552	0.26871	-1.04775	0.294754	0.502269
YCL027W	FUS1	protein_coding	III	Membrane protein localized to the shmoo tip; required for cell fusion; expression regulated by mating pheromone; proposed to coordinate signaling, fusion, and polarization events required for fusion; potential Cdc28p substrate	261.11	-1.0573	0.3417	-3.09049	0.00199826	0.0176695
YCL028W	RNQ1	protein_coding	III	[PIN(+)] prion; an infectious protein conformation that is generally an ordered protein aggregate	554.347	-0.327488	0.135493	-2.4171	0.0156447	0.073822
YCL029C	BIK1	protein_coding	III	Microtubule-associated protein; component of the interface between microtubules and kinetochore, involved in sister chromatid separation; essential in polyploid cells but not in haploid or diploid cells; ortholog of mammalian CLIP-170	295.974	0.0191532	0.154358	0.123805	0.901469	0.952065
YCL030C	HIS4	protein_coding	III	Multifunctional enzyme containing phosphoribosyl-ATP pyrophosphatase; phosphoribosyl-AMP cyclohydrolase, and histidinol dehydrogenase activities; catalyzes the second, third, ninth and tenth steps in histidine biosynthesis	10240.6	0.332012	0.46054	0.718565	0.472409	0.673529
YCL031C	RRP7	protein_coding	III	Essential protein involved in rRNA processing and ribosome biogenesis; protein abundance increases in response to DNA replication stress	904.289	-0.121029	0.115662	-1.04636	0.295395	0.502668
YCL032W	STE50	protein_coding	III	Adaptor protein for various signaling pathways; involved in mating response, invasive/filamentous growth, osmotolerance; acts as an adaptor that links G protein-associated Cdc42p-Ste20p complex to the effector Ste11p to modulate signal transduction	145.685	-0.0548109	0.17483	-0.313174	0.754148	0.87573
YCL033C	MXR2	protein_coding	III	Methionine-R-sulfoxide reductase; involved in the response to oxidative stress; protects iron-sulfur clusters from oxidative inactivation along with MXR1; involved in the regulation of lifespan	152.881	-0.0732295	0.18811	-0.389813	0.696675	0.835252
YCL034W	LSB5	protein_coding	III	Protein of unknown function; binds Las17p, which is a homolog of human Wiskott-Aldrich Syndrome protein involved in actin patch assembly and actin polymerization; may mediate disassembly of the Pan1 complex from the endocytic coat	435.551	0.199988	0.18263	1.09474	0.273632	0.478963
YCL035C	GRX1	protein_coding	III	Glutathione-dependent disulfide oxidoreductase; hydroperoxide and superoxide-radical responsive, heat-stable, with active site cysteine pair; protects cells from oxidative damage; GRX1 has a paralog, GRX2, that arose from the whole genome duplication; protein abundance increases in response to DNA replication stress	901.157	0.533048	0.124162	4.29309	1.76203e-05	0.000512984
YCL036W	GFD2	protein_coding	III	Protein of unknown function; identified as a high-copy suppressor of a dbp5 mutation; GFD2 has a paralog, YDR514C, that arose from the whole genome duplication	280.447	-0.395491	0.301545	-1.31086	0.189906	0.385052
YCL037C	SRO9	protein_coding	III	Cytoplasmic RNA-binding protein; shuttles between nucleus and cytoplasm and is exported from the nucleus in an mRNA export-dependent manner; associates with translating ribosomes; involved in heme regulation of Hap1p as a component of the HMC complex, also involved in the organization of actin filaments; contains a La motif; SRO9 has a paralog, SLF1, that arose from the whole genome duplication	1061.68	-0.1401	0.24179	-0.579459	0.562279	0.743283
YCL038C	ATG22	protein_coding	III	Vacuolar integral membrane protein required for efflux of amino acids; required for efflux of amino acids during autophagic body breakdown in the vacuole; null mutation causes a gradual loss of viability during starvation	392.12	0.639735	0.236236	2.70899	0.00674877	0.0411595
YCL039W	GID7	protein_coding	III	Subunit of GID Complex that binds directly to central component Vid30p; GID complex is involved in proteasome-dependent catabolite inactivation of fructose-1,6-bisphosphatase; Gid7p contains six WD40 repeats; computational analysis suggests that Gid7p and Moh1p have similar functions	355.536	0.188138	0.181552	1.03711	0.299685	0.507311
YCL040W	GLK1	protein_coding	III	Glucokinase; catalyzes the phosphorylation of glucose at C6 in the first irreversible step of glucose metabolism; one of three glucose phosphorylating enzymes; expression regulated by non-fermentable carbon sources; GLK1 has a paralog, EMI2, that arose from the whole genome duplication	2826.51	0.0608873	0.217404	0.279991	0.779484	0.890508
YCL041C		protein_coding	III	Dubious open reading frame; unlikely to encode a functional protein, based on available experimental and comparative sequence data; partially overlaps both the verified gene PDI1/YCL043C and the uncharacterized gene YCL042W	11.6003	-0.283714	0.60248	-0.473844	0.635611	0.794177
YCL042W		protein_coding	III	Putative protein of unknown function; epitope-tagged protein localizes to the cytoplasm	13.6992	0.285133	0.476127	0.628333	0.529786	0.721022
YCL043C	PDI1	protein_coding	III	Protein disulfide isomerase; multifunctional protein of ER lumen, essential for formation of disulfide bonds in secretory and cell-surface proteins, unscrambles non-native disulfide bonds; key regulator of Ero1p; forms complex with Mnl1p that has exomannosidase activity, processing unfolded protein-bound Man8GlcNAc2 oligosaccharides to Man7GlcNAc2, promoting degradation in unfolded protein respon…	4884.24	-0.116245	0.147416	-0.788559	0.43037	0.63653
YCL044C	MGR1	protein_coding	III	Subunit of the mitochondrial (mt) i-AAA protease supercomplex; i-AAA degrades misfolded mitochondrial proteins; forms a subcomplex with Mgr3p that binds to substrates to facilitate proteolysis; required for growth of cells lacking mtDNA	151.911	-0.0261383	0.242125	-0.10505	0.916336	0.961351
YCL045C	EMC1	protein_coding	III	Member of conserved endoplasmic reticulum membrane complex; involved in efficient folding of proteins in the ER; null mutant displays induction of the unfolded protein response; interacts with Gal80p; homologous to worm H17B01.4/EMC-1, fly CG2943, and human KIAA0090	1824.23	-0.16828	0.134308	-1.25297	0.210218	0.409037
YCL047C	POF1	protein_coding	III	Nicotinamide mononucleotide-specific adenylyltransferase (NMNAT); catalyzes the conversion of nicotinamide mononucleotide (NMN) to nicotinamide adenine dinucleotide (NAD+); role in the nicotinamide riboside (NR) salvage pathway of NAD+ biosynthesis; involved in NR and NAD+ homeostasis; ATPase involved in protein quality control and filamentation pathways; interacts physically with Kss1p and suppr…	154.114	-0.100476	0.175641	-0.571834	0.567434	0.746199
YCL048W	SPS22	protein_coding	III	Protein of unknown function; SPS22 has a paralog, SPS2, that arose from the whole genome duplication; redundant with Sps2p for the organization of the beta-glucan layer of the spore wall	21.1321	1.67096	0.485863	3.36719	0.000759375	0.00885985
YCL048W-A		protein_coding	III	Putative protein of unknown function; YCL048W-A has a paralog, YDR524C-B, that arose from the whole genome duplication	49.5501	1.68818	0.525522	3.16765	0.00153676	0.0145697
YCL049C		protein_coding	III	Protein of unknown function; localizes to membrane fraction; YCL049C is not an essential gene	253.974	0.236293	0.245283	0.963355	0.335369	0.544924
YCL050C	APA1	protein_coding	III	AP4A phosphorylase; bifunctional diadenosine 5',5'''-P1,P4-tetraphosphate phosphorylase and ADP sulfurylase involved in catabolism of bis(5'-nucleosidyl) tetraphosphates; catalyzes phosphorolysis of dinucleoside oligophosphates, cleaving substrates' alpha/beta-anhydride bond and introducing Pi into the beta-position of the corresponding NDP formed; protein abundance increases under DNA replicatio…	864.398	-0.526844	0.19276	-2.73293	0.0062773	0.0391162
YCL051W	LRE1	protein_coding	III	Protein involved in control of cell wall structure and stress response; direct inhibitor of the nuclear Dbf2 related (NDR) kinase Cbk1p-Mob2p; overproduction confers resistance to cell-wall degrading enzymes; exhibits genetic interactions with genes involved in the cell wall integrity pathway; LRE1 has a paralog, HLR1, that arose from the whole genome duplication	447.172	-0.171445	0.145135	-1.18121	0.237519	0.440082
YCL052C	PBN1	protein_coding	III	Component of glycosylphosphatidylinositol-mannosyltransferase I; essential component; required for the autocatalytic post-translational processing of the protease B precursor Prb1p; localizes to ER in lumenal orientation; homolog of mammalian PIG-X	586.046	-0.084242	0.144677	-0.582112	0.560491	0.742669
YCL054W	SPB1	protein_coding	III	AdoMet-dependent methyltransferase; involved in rRNA processing and 60S ribosomal subunit maturation; methylates G2922 in the tRNA docking site of the large subunit rRNA and in the absence of snR52, U2921; suppressor of PAB1 mutants	1008.2	-0.124918	0.20374	-0.613163	0.539769	0.728824
YCL055W	KAR4	protein_coding	III	Transcription factor required for response to pheromones; also required during meiosis; exists in two forms, a slower-migrating form more abundant during vegetative growth and a faster-migrating form induced by pheromone	398.455	-0.431517	0.206492	-2.08947	0.0366655	0.130383
YCL056C	PEX34	protein_coding	III	Protein that regulates peroxisome populations; peroxisomal integral membrane protein; interacts with Pex11p, Pex25p, and Pex27p to control both constitutive peroxisome division and peroxisome morphology and abundance during peroxisome proliferation	75.9365	0.0208245	0.237503	0.088059	0.92983	0.965821
YCL057C-A	MIC10	protein_coding	III	Conserved component of the MICOS complex; MICOS (formerly MINOS or MitOS) is a mitochondrial inner membrane complex that extends into the intermembrane space and has a role in the maintenance of crista junctions, inner membrane architecture, and formation of contact sites to the outer membrane; ortholog of human MINOS1	238.2	0.145919	0.16956	0.859546	0.390039	0.600082
YCL057W	PRD1	protein_coding	III	Zinc metalloendopeptidase; found in the cytoplasm and intermembrane space of mitochondria; with Cym1p, involved in degradation of mitochondrial proteins and of presequence peptides cleaved from imported proteins; protein abundance increases in response to DNA replication stress	1050.31	-0.120538	0.21433	-0.562358	0.573872	0.751366
YCL058C	FYV5	protein_coding	III	Protein involved in regulation of the mating pathway; binds with Matalpha2p to promoters of haploid-specific genes; required for survival upon exposure to K1 killer toxin; involved in ion homeostasis	150.255	0.333444	0.21652	1.53991	0.123582	0.294156
YCL058W-A	ADF1	protein_coding	III	Transcriptional repressor encoded by the FYV5 antisense strand; negatively regulates transcription of FYV5 by binding to the promoter on the sense strand	24.2052	0.890415	0.453151	2.00403	0.0450667	0.15076
YCL059C	KRR1	protein_coding	III	Nucleolar protein required for rRNA synthesis and ribosomal assembly; required for the synthesis of 18S rRNA and for the assembly of 40S ribosomal subunit; essential gene	679.286	-0.319626	0.18232	-1.753	0.079602	0.218968
YCL061C	MRC1	protein_coding	III	S-phase checkpoint protein required for DNA replication; couples DNA helicase and DNA polymerase; interacts with and stabilizes Pol2p at stalled replication forks during stress, where it forms a pausing complex with Tof1p and is phosphorylated by Mec1p; with Hog1p defines a novel S-phase checkpoint that permits eukaryotic cells to prevent conflicts between DNA replication and transcription; prote…	499.807	-0.181045	0.114726	-1.57815	0.114532	0.278523
YCL063W	VAC17	protein_coding	III	Phosphoprotein involved in vacuole inheritance; degraded in late M phase of the cell cycle; acts as a vacuole-specific receptor for myosin Myo2p	285.728	0.187103	0.145148	1.28829	0.197647	0.394399
YCL064C	CHA1	protein_coding	III	Catabolic L-serine (L-threonine) deaminase; catalyzes the degradation of both L-serine and L-threonine; required to use serine or threonine as the sole nitrogen source, transcriptionally induced by serine and threonine	421.48	0.867417	0.499137	1.78766	0.0738303	0.20922
YCL073C	GEX1	protein_coding	III	Proton:glutathione antiporter; localized to the vacuolar and plasma membranes; imports glutathione from the vacuole and exports it through the plasma membrane; has a role in resistance to oxidative stress and modulation of the PKA pathway; GEX1 has a paralog, GEX2, that arose from a segmental duplication	3.65034	-0.931248	0.749497	-1.5208	0.12831	0.302495
YCL074W		pseudogene	III	Pseudogene: encodes fragment of Ty Pol protein	14.408	0.832668	0.749578	1.36152	0.173348	0.36528
YCL075W		pseudogene	III	Pseudogene: encodes fragment of Ty Pol protein	6.44666	-0.128049	0.750427	-0.147628	0.882636	0.941038
YCL076W		protein_coding	III	Dubious open reading frame; unlikely to encode a functional protein, based on available experimental and comparative sequence data	2.503	-0.103017	0.74781	-0.137698	0.890479
YCR002C	CDC10	protein_coding	III	Component of the septin ring, required for cytokinesis; septins are GTP-binding proteins that assemble into rod-like hetero-oligomers that can associate to form filaments; septin rings at the mother-bud neck act as scaffolds for recruiting cell division factors and as barriers to prevent diffusion of specific proteins between mother and daughter cells; N-terminus interacts with phosphatidylinosit…	720.825	0.163215	0.100642	1.62159	0.104891	0.262633
YCR003W	MRPL32	protein_coding	III	Mitochondrial ribosomal protein of the large subunit; protein abundance increases in response to DNA replication stress	273.215	-0.240477	0.124115	-1.93676	0.0527741	0.167466
YCR004C	YCP4	protein_coding	III	Protein of unknown function; has sequence and structural similarity to flavodoxins; predicted to be palmitoylated; the authentic, non-tagged protein is detected in highly purified mitochondria in high-throughput studies	804.64	-0.240565	0.159318	-1.51011	0.131016	0.305873
YCR005C	CIT2	protein_coding	III	Citrate synthase; catalyzes the condensation of acetyl coenzyme A and oxaloacetate to form citrate, peroxisomal isozyme involved in glyoxylate cycle; expression is controlled by Rtg1p and Rtg2p transcription factors; CIT2 has a paralog, CIT1, that arose from the whole genome duplication	12414.8	1.41392	0.443326	3.19226	0.00141163	0.0137467
YCR006C		protein_coding	III	Dubious open reading frame; unlikely to encode a functional protein, based on available experimental and comparative sequence data	61.0644	0.792991	0.315724	2.51333	0.0119598	0.0610048
YCR007C		protein_coding	III	Putative integral membrane protein; member of DUP240 gene family; YCR007C is not an essential gene	105.287	0.488035	0.338254	1.452	0.146501	0.327967
YCR008W	SAT4	protein_coding	III	Ser/Thr protein kinase involved in salt tolerance; funtions in regulation of Trk1p-Trk2p potassium transporter; overexpression affects the Fe-S and lipoamide containing proteins in the mitochondrion; required for lipoylation of Lat1p, Kgd2p and Gcv3p; partially redundant with Hal5p; has similarity to Npr1p; localizes to the cytoplasm and mitochondrion	1055.18	-0.0146905	0.119678	-0.123037	0.902078	0.952382
YCR009C	RVS161	protein_coding	III	Amphiphysin-like lipid raft protein; interacts with Rvs167p and regulates polarization of the actin cytoskeleton, endocytosis, cell polarity, cell fusion and viability following starvation or osmotic stress	1004.28	-0.43637	0.107401	-4.063	4.84456e-05	0.00118184
YCR010C	ADY2	protein_coding	III	Acetate transporter required for normal sporulation; phosphorylated in mitochondria; ADY2 has a paralog, ATO2, that arose from the whole genome duplication	19.612	0.713127	0.542812	1.36194	0.173216	0.365126
YCR011C	ADP1	protein_coding	III	Putative ATP-dependent permease of the ABC transporter family	1364.55	0.0575518	0.145238	0.396312	0.691875	0.832182
YCR012W	PGK1	protein_coding	III	3-phosphoglycerate kinase; catalyzes transfer of high-energy phosphoryl groups from the acyl phosphate of 1,3-bisphosphoglycerate to ADP to produce ATP; key enzyme in glycolysis and gluconeogenesis	18510.3	-0.809943	0.182287	-4.44229	8.90066e-06	0.000305194
YCR013C		protein_coding	III	Dubious open reading frame; unlikely to encode a functional protein, based on available experimental and comparative sequence data; transcription of both YCR013C and the overlapping essential gene PGK1 is reduced in a gcr1 null mutant	3.93394	-0.692169	0.661328	-1.02989	0.303059	0.510364
YCR014C	POL4	protein_coding	III	DNA polymerase IV; undergoes pair-wise interactions with Dnl4p-Lif1p and Rad27p to mediate repair of DNA double-strand breaks by non-homologous end joining (NHEJ); homologous to mammalian DNA polymerase beta	225.487	0.210954	0.152983	1.37893	0.167916	0.358248
YCR015C		protein_coding	III	Putative protein of unknown function; YCR015C is not an essential gene	172.005	0.0307367	0.16843	0.181621	0.85588	0.927892
YCR016W		protein_coding	III	Putative protein of unknown function; green fluorescent protein (GFP)-fusion protein localizes to the nucleolus and nucleus; predicted to be involved in ribosome biogenesis	346.435	-0.300567	0.183679	-1.63642	0.101752	0.256751
YCR017C	CWH43	protein_coding	III	Putative sensor/transporter protein involved in cell wall biogenesis; contains 14-16 transmembrane segments and several putative glycosylation and phosphorylation sites; null mutation is synthetically lethal with pkc1 deletion	1539.12	-0.130432	0.137756	-0.946867	0.343706	0.553725
YCR018C	SRD1	protein_coding	III	Protein involved in the processing of pre-rRNA to mature rRNA; contains a C2/C2 zinc finger motif; srd1 mutation suppresses defects caused by the rrp1-1 mutation	190.766	0.268813	0.277044	0.968972	0.332559	0.541857
YCR018C-A		protein_coding	III	Putative protein of unknown function; encoded opposite a Ty1 LTR	8.23333	0.379512	0.523478	0.719131	0.47206	0.673343
YCR019W	MAK32	protein_coding	III	Protein necessary for stability of L-A dsRNA-containing particles	152.823	0.192873	0.2043	0.943145	0.345607	0.554714
YCR020C	PET18	protein_coding	III	Protein of unknown function; has weak similarity to proteins involved in thiamin metabolism; expression is induced in the absence of thiamin	145.127	1.18153	0.215486	5.48276	4.18747e-08	4.10239e-06
YCR020C-A	MAK31	protein_coding	III	Non-catalytic subunit of N-terminal acetyltransferase of the NatC type; required for replication of dsRNA virus; member of the Sm protein family	199.641	0.161199	0.237451	0.681138	0.495784	0.692064
YCR020W-B	HTL1	protein_coding	III	Component of the RSC chromatin remodeling complex; RSC functions in transcriptional regulation and elongation, chromosome stability, and establishing sister chromatid cohesion; involved in telomere maintenance	117.335	0.494141	0.227624	2.17237	0.0298274	0.114132
YCR021C	HSP30	protein_coding	III	Negative regulator of the H(+)-ATPase Pma1p; stress-responsive protein; hydrophobic plasma membrane localized; induced by heat shock, ethanol treatment, weak organic acid, glucose limitation, and entry into stationary phase	556.776	0.927713	0.58894	1.58029	0.114041	0.277926
YCR023C		protein_coding	III	Vacuolar membrane protein of unknown function; member of the multidrug resistance family; YCR023C is not an essential gene	509.703	0.385814	0.299569	1.28698	0.198102	0.394908
YCR024C	SLM5	protein_coding	III	Mitochondrial asparaginyl-tRNA synthetase	208.412	-0.135076	0.184012	-0.732387	0.463933	0.667146
YCR024C-A	PMP1	protein_coding	III	Regulatory subunit for the plasma membrane H(+)-ATPase Pma1p; small single-membrane span proteolipid; forms unique helix and positively charged cytoplasmic domain that is able to specifically segregate phosphatidylserines; PMP1 has a paralog, PMP2, that arose from the whole genome duplication	1343.58	0.233104	0.103597	2.24979	0.0244622	0.100453
YCR024C-B		protein_coding	III	Putative protein of unknown function; identified by expression profiling and mass spectrometry	2590.93	0.0346064	0.132899	0.260228	0.794688	0.897241
YCR025C		protein_coding	III	Dubious open reading frame; unlikely to encode a functional protein, based on available experimental and comparative sequence data; YCR025C is not an essential gene	11.9503	0.484017	0.442396	1.08755	0.276794	0.482819
YCR026C	NPP1	protein_coding	III	Nucleotide pyrophosphatase/phosphodiesterase; mediates extracellular nucleotide phosphate hydrolysis along with Npp2p and Pho5p; activity and expression enhanced during conditions of phosphate starvation; involved in spore wall assembly; NPP1 has a paralog, NPP2, that arose from the whole genome duplication, and an npp1 npp2 double mutant exhibits reduced dityrosine fluorescence relative to the s…	578.08	-0.0904764	0.18709	-0.483461	0.628769	0.789254
YCR027C	RHB1	protein_coding	III	Putative Rheb-related GTPase; involved in regulating canavanine resistance and arginine uptake; member of the Ras superfamily of G-proteins	203.465	0.184047	0.134135	1.37217	0.170011	0.361207
YCR028C	FEN2	protein_coding	III	Plasma membrane H+-pantothenate symporter; confers sensitivity to the antifungal agent fenpropimorph; relocalizes from vacuole to cytoplasm upon DNA replication stress	303.06	0.204693	0.158025	1.29549	0.19515	0.392217
YCR028C-A	RIM1	protein_coding	III	ssDNA-binding protein essential for mitochondrial genome maintenance; involved in mitochondrial DNA replication	481.433	-0.597451	0.129779	-4.60321	4.16022e-06	0.000172328
YCR030C	SYP1	protein_coding	III	Negative regulator of WASP-Arp23 complex; involved in endocytic site formation; directly inhibits Las17p stimulation of Arp23 complex-mediated actin assembly in vitro; may regulate assembly and disassembly of the septin ring; colocalizes and interacts with septin subunits; potential role in actin cytoskeletal organization	637.693	-0.0200074	0.159798	-0.124415	0.900987	0.951882
YCR031C	RPS14A	protein_coding	III	Protein component of the small (40S) ribosomal subunit; required for ribosome assembly and 20S pre-rRNA processing; mutations confer cryptopleurine resistance; homologous to mammalian ribosomal protein S14 and bacterial S11; RPS14A has a paralog, RPS14B, that arose from the whole genome duplication	4886.18	-0.491772	0.206421	-2.38184	0.0172266	0.0787879
YCR032W	BPH1	protein_coding	III	Protein homologous to Chediak-Higashi syndrome and Beige proteins; both of which are implicated in disease syndromes in human and mouse, respectively, due to defective lysosomal trafficking; mutant phenotype and genetic interactions suggest a role in protein sorting	1473.02	0.227061	0.145392	1.5622	0.118242	0.28474
YCR033W	SNT1	protein_coding	III	Subunit of the Set3C deacetylase complex; interacts directly with the Set3C subunit, Sif2p; putative DNA-binding protein; mutant has increased aneuploidy tolerance; relocalizes to the cytosol in response to hypoxia	1546.53	0.0268207	0.104612	0.25653	0.797542	0.898609
YCR034W	ELO2	protein_coding	III	Fatty acid elongase, involved in sphingolipid biosynthesis; acts on fatty acids of up to 24 carbons in length; mutations have regulatory effects on 1,3-beta-glucan synthase, vacuolar ATPase, and the secretory pathway; ELO2 has a paralog, ELO1, that arose from the whole genome duplication	616.291	-0.543553	0.208153	-2.60988	0.00905734	0.0507801
YCR035C	RRP43	protein_coding	III	Exosome non-catalytic core component; involved in 3'-5' RNA processing and degradation in both the nucleus and the cytoplasm; has similarity to E. coli RNase PH and to human hRrp43p (OIP2, EXOSC8); protein abundance increases in response to DNA replication stress	729.987	0.202627	0.118887	1.70467	0.0882553	0.233251
YCR036W	RBK1	protein_coding	III	Putative ribokinase	531.106	0.454366	0.152182	2.98671	0.00281998	0.0221719
YCR037C	PHO87	protein_coding	III	Low-affinity inorganic phosphate (Pi) transporter; acts upstream of Pho81p in regulation of the PHO pathway; expression is independent of Pi concentration and Pho4p activity; contains 12 membrane-spanning segments; PHO87 has a paralog, PHO90, that arose from the whole genome duplication	747.008	-0.173177	0.125796	-1.3767	0.168604	0.359208
YCR038C	BUD5	protein_coding	III	GTP/GDP exchange factor for Rsr1p (Bud1p); required for both axial and bipolar budding patterns; mutants exhibit random budding in all cell types	166.345	-0.00904995	0.182494	-0.0482604	0.961509	0.984514
YCR041W		protein_coding	III	Dubious open reading frame; unlikely to encode a functional protein, based on available experimental and comparative sequence data	15.3416	-0.448913	0.378395	-1.18553	0.235806	0.438504
YCR042C	TAF2	protein_coding	III	TFIID subunit (150 kDa); involved in RNA polymerase II transcription initiation	824.617	0.176093	0.116059	1.5188	0.128813	0.303018
YCR043C		protein_coding	III	Putative protein of unknown function; green fluorescent protein (GFP)-fusion protein localizes to the Golgi apparatus; YCR043C is not an essential gene	220.421	-0.507417	0.163453	-3.1045	0.00190599	0.0171985
YCR044C	PER1	protein_coding	III	Protein of the endoplasmic reticulum; required for GPI-phospholipase A2 activity that remodels the GPI anchor as a prerequisite for association of GPI-anchored proteins with lipid rafts; functionally complemented by human ortholog PERLD1	375.052	-0.330313	0.104254	-3.16855	0.00153203	0.0145472
YCR045C	RRT12	protein_coding	III	Probable subtilisin-family protease; role in formation of the dityrosine layer of spore walls; localizes to the spore wall and also the nuclear envelope and ER region in mature spores	11.2005	0.381134	0.568831	0.71127	0.476917	0.67792
YCR045W-A		protein_coding	III	Dubious open reading frame; unlikely to encode a functional protein, based on available experimental and comparative sequence data; completely overlaps with YCR045C; identified by gene-trapping, microarray expression analysis, and genome-wide homology searching	60.7733	-0.05947	0.216368	-0.276435	0.782214	0.892171
YCR046C	IMG1	protein_coding	III	Mitochondrial ribosomal protein of the large subunit; required for respiration and for maintenance of the mitochondrial genome	180.875	-0.60987	0.161958	-3.76554	0.000166192	0.00288939
YCR047C	BUD23	protein_coding	III	Methyltransferase; methylates residue G1575 of 18S rRNA; required for rRNA processing and nuclear export of 40S ribosomal subunits independently of methylation activity; diploid mutant displays random budding pattern	177.387	-0.0842858	0.213835	-0.39428	0.693375	0.832877
YCR048W	ARE1	protein_coding	III	Acyl-CoA:sterol acyltransferase; endoplasmic reticulum enzyme that contributes the major sterol esterification activity in the absence of oxygen; ARE1 has a paralog, ARE2, that arose from the whole genome duplication	506.222	0.200327	0.167452	1.19644	0.231526	0.43368
YCR051W		protein_coding	III	Putative protein of unknown function; green fluorescent protein (GFP)-fusion protein localizes to the cytoplasm and nucleus; contains ankyrin (Ank) repeats; YCR051W is not an essential gene	323.65	-0.126228	0.162704	-0.776447	0.437485	0.643048
YCR052W	RSC6	protein_coding	III	Component of the RSC chromatin remodeling complex; essential for mitotic growth; RSC6 has a paralog, SNF12, that arose from the whole genome duplication	764.454	-0.025589	0.151195	-0.169202	0.865638	0.933552
YCR053W	THR4	protein_coding	III	Threonine synthase; conserved protein that catalyzes formation of threonine from O-phosphohomoserine; expression is regulated by the GCN4-mediated general amino acid control pathway	2434.07	0.112015	0.126909	0.882582	0.377462	0.58653
YCR054C	CTR86	protein_coding	III	Essential protein of unknown function; with orthologs in Ashbya gossypii and Candida albicans; similar to human ATXN10, mutations in which cause spinocerebellar ataxia type 10; codon usage corresponds to that observed for yeast genes expressed at low levels; relative distribution to the nucleus increases upon DNA replication stress	323.437	0.133002	0.169141	0.786543	0.43155	0.637469
YCR057C	PWP2	protein_coding	III	Conserved 90S pre-ribosomal component; essential for proper endonucleolytic cleavage of the 35 S rRNA precursor at A0, A1, and A2 sites; contains eight WD-repeats; PWP2 deletion leads to defects in cell cycle and bud morphogenesis	1565.87	-0.19292	0.203493	-0.948023	0.343118	0.553219
YCR059C	YIH1	protein_coding	III	Negative regulator of eIF2 kinase Gcn2p; competes with Gcn2p for binding to Gcn1p; may contribute to regulation of translation in response to starvation via regulation of Gcn2p; binds to monomeric actin and to ribosomes and polyribosomes; ortholog of mammalian IMPACT	214.591	-0.477407	0.223864	-2.13239	0.0329746	0.122195
YCR060W	TAH1	protein_coding	III	Component of conserved R2TP complex (Rvb1-Rvb2-Tah1-Pih1); R2TP complex interacts with Hsp90 (Hsp82p and Hsc82p) to mediate assembly of large protein complexes such as box C/D snoRNPs and RNA polymerase II; contains a single TPR domain with at least two TPR motifs; plays a role in determining prion variants	118.787	0.318893	0.17709	1.79897	0.0720237	0.205992
YCR061W		protein_coding	III	Protein of unknown function; green fluorescent protein (GFP)-fusion protein localizes to the cytoplasm in a punctate pattern; induced by treatment with 8-methoxypsoralen and UVA irradiation	228.911	0.189874	0.260479	0.728949	0.466033	0.66892
YCR063W	BUD31	protein_coding	III	Component of the SF3b subcomplex of the U2 snRNP; increases efficiency of first and second step pre-mRNA splicing; diploid mutants display a random budding pattern instead of the wild-type bipolar pattern; facilitates passage through G1/S Start, but is not required for G2/M transition or exit from mitosis	73.9899	0.551651	0.260188	2.11923	0.034071	0.125096
YCR064C		protein_coding	III	Dubious open reading frame; unlikely to encode a functional protein, based on available experimental and comparative sequence data; partially overlaps the verified gene BUD31	11.1338	-0.362232	0.520841	-0.692371	0.488704	0.686934
YCR065W	HCM1	protein_coding	III	Forkhead transcription factor; drives S-phase specific expression of genes involved in chromosome segregation, spindle dynamics, and budding; suppressor of calmodulin mutants with specific SPB assembly defects; telomere maintenance role; regulates replicative lifespan; ortholog of C. elegans lifespan regulator PHA-4	477.718	0.0752121	0.151804	0.495211	0.620451	0.782437
YCR066W	RAD18	protein_coding	III	E3 ubiquitin ligase; forms heterodimer with Rad6p to monoubiquitinate PCNA-K164; heterodimer binds single-stranded DNA and has single-stranded DNA dependent ATPase activity; required for postreplication repair; SUMO-targeted ubiquitin ligase (STUbl) that contains a SUMO-interacting motif (SIM) which stimulates its ubiquitin ligase activity towards the sumoylated form of PCNA	160.585	0.270055	0.152953	1.76686	0.0772522	0.215357
YCR067C	SED4	protein_coding	III	Integral ER membrane protein that stimulates Sar1p GTPase activity; involved in COPII vesicle budding through disassociation of coat proteins from membranes onto liposomes; binds Sec16p; SED4 has a paralog, SEC12, that arose from the whole genome duplication	866.948	-0.0415489	0.134123	-0.309596	0.756868	0.877207
YCR068W	ATG15	protein_coding	III	Lipase required for intravacuolar lysis of autophagic and Cvt bodies; targeted to intravacuolar vesicles during autophagy via the multivesicular body (MVB) pathway	390.578	0.500256	0.235284	2.12682	0.0334351	0.123496
YCR069W	CPR4	protein_coding	III	Peptidyl-prolyl cis-trans isomerase (cyclophilin); catalyzes the cis-trans isomerization of peptide bonds N-terminal to proline residues; has a potential role in the secretory pathway; CPR4 has a paralog, CPR8, that arose from the whole genome duplication	616.054	0.104527	0.177125	0.589799	0.555326	0.738491
YCR071C	IMG2	protein_coding	III	Mitochondrial ribosomal protein of the large subunit; conserved in metazoa, with similarity to human mitochondrial ribosomal protein MRPL49	129.448	-0.3097	0.216126	-1.43354	0.151705	0.335719
YCR072C	RSA4	protein_coding	III	WD-repeat protein involved in ribosome biogenesis; may interact with ribosomes; required for maturation and efficient intra-nuclear transport or pre-60S ribosomal subunits, localizes to the nucleolus	516.343	-0.0508538	0.224777	-0.226339	0.820937	0.911676
YCR073C	SSK22	protein_coding	III	MAP kinase kinase kinase of HOG1 mitogen-activated signaling pathway; functionally redundant with Ssk2p; interacts with and is activated by Ssk1p; phosphorylates Pbs2p; SSK22 has a paralog, SSK2, that arose from the whole genome duplication	688.334	0.677984	0.22155	3.06255	0.00219463	0.0187363
YCR073W-A	SOL2	protein_coding	III	Protein with a possible role in tRNA export; shows similarity to 6-phosphogluconolactonase non-catalytic domains but does not exhibit this enzymatic activity; homologous to Sol3p and Sol4p; SOL2 has a paralog, SOL1, that arose from the whole genome duplication	294.249	0.00609159	0.223482	0.0270739	0.978401	0.991575
YCR075C	ERS1	protein_coding	III	Protein with similarity to human cystinosin; cystinosin is a H(+)-driven transporter involved in L-cystine export from lysosomes and implicated in the disease cystinosis; contains seven transmembrane domains	107.263	-0.0021118	0.208184	-0.0134775	0.989247	0.99528
YCR075W-A		protein_coding	III	Putative protein of unknown function; identified by homology to Ashbya gossypii; YCR075W-A has a paralog, YNR034W-A, that arose from the whole genome duplication	43.8137	-0.179468	0.266218	-0.676779	0.498546	0.694119
YCR076C	FUB1	protein_coding	III	Proteasome-binding protein; interacts physically with multiple subunits of the 20S proteasome and genetically with genes encoding 20S core particle and 19S regulatory particle subunits; exhibits boundary activity which blocks the propagation of heterochromatic silencing; contains a PI31 proteasome regulator domain and sequence similarity with human PSMF1, a proteasome inhibitor; not an essential …	145.694	0.566917	0.184322	3.07416	0.00211097	0.0182853
YCR077C	PAT1	protein_coding	III	Deadenylation-dependent mRNA-decapping factor; also required for faithful chromosome transmission, maintenance of rDNA locus stability, and protection of mRNA 3'-UTRs from trimming; associated with topoisomerase II; binds to mRNAs under glucose starvation, most often in the 3' UTR; functionally linked to Pab1p; forms cytoplasmic foci upon DNA replication stress; phosphorylation by PKA inhibits P …	1761.3	-0.235699	0.145335	-1.62176	0.104855	0.262633
YCR079W	PTC6	protein_coding	III	Mitochondrial type 2C protein phosphatase (PP2C); has similarity to mammalian PP1Ks; involved in mitophagy; null mutant is sensitive to rapamycin and has decreased phosphorylation of the Pda1 subunit of pyruvate dehydrogenase	253.425	0.1739	0.160999	1.08052	0.279913	0.485191
YCR081C-A		protein_coding	III	Dubious open reading frame; unlikely to encode a functional protein, based on available experimental and comparative sequence data; completely overlaps with SRB8/YCR081W; identified by gene-trapping, microarray expression analysis, and genome-wide homology searching	3.33281	0.348053	0.736709	0.651469	0.514744	0.707215
YCR081W	SRB8	protein_coding	III	Subunit of the RNA polymerase II mediator complex; associates with core polymerase subunits to form the RNA polymerase II holoenzyme; essential for transcriptional regulation; involved in glucose repression	1002.35	0.462444	0.147177	3.14287	0.00167303	0.015458
YCR082W	AHC2	protein_coding	III	Component of the ADA histone acetyltransferase complex; Ach2p and Ach1p are unique to the ADA complex and not shared with the related SAGA and SLIK complexes; may tether Ach1p to the complex	586.152	-0.0413489	0.108889	-0.379656	0.704201	0.841052
YCR083W	TRX3	protein_coding	III	Mitochondrial thioredoxin; highly conserved oxidoreductase required to maintain the redox homeostasis of the cell, forms the mitochondrial thioredoxin system with Trr2p, redox state is maintained by both Trr2p and Glr1p	250.478	0.109158	0.174798	0.625115	0.531896	0.722163
YCR084C	TUP1	protein_coding	III	General repressor of transcription; forms complex with Cyc8p, involved in the establishment of repressive chromatin structure through interactions with histones H3 and H4, appears to enhance expression of some genes	1153.64	0.0691117	0.159803	0.432444	0.665419	0.814979
YCR085W		protein_coding	III	Dubious open reading frame; unlikely to encode a functional protein, based on available experimental and comparative sequence data	5.09685	-0.318064	0.680198	-0.484955	0.627708	0.788564
YCR086W	CSM1	protein_coding	III	Nucleolar protein that mediates homolog segregation during meiosis I; forms a complex with Lrs4p and then Mam1p at kinetochores; required for condensin recruitment to the replication fork barrier site and rDNA repeat segregation	78.4191	0.290534	0.190874	1.51874	0.128827	0.303018
YCR087C-A		protein_coding	III	Putative protein of unknown function; green fluorescent protein (GFP)-fusion protein localizes to the nucleolus; YCR087C-A is not an essential gene	150.198	-0.567504	0.301426	-1.88212	0.0598196	0.182324
YCR087W		protein_coding	III	Dubious open reading frame; unlikely to encode a functional protein, based on available experimental and comparative sequence data; partially overlaps uncharacterized gene YCR087C-A; YCR087W is not an essential gene	11.8782	-0.39949	0.447844	-0.890926	0.372969	0.582333
YCR088W	ABP1	protein_coding	III	Actin-binding protein of the cortical actin cytoskeleton; important for activation of the Arp2/3 complex that plays a key role actin in cytoskeleton organization; inhibits barbed-end actin filament elongation; phosphorylation within its Proline-Rich Regio, mediated by Cdc28p and Pho85p, protects Abp1p from proteolysis mediated by its own PEST sequences; mammalian homologue of HIP-55 (hematopoieti…	1888.53	-0.0763203	0.154103	-0.495291	0.620395	0.782437
YCR089W	FIG2	protein_coding	III	Cell wall adhesin, expressed specifically during mating; may be involved in maintenance of cell wall integrity during mating; FIG2 has a paralog, AGA1, that arose from the whole genome duplication	254.608	0.506268	0.242045	2.09594	0.0360878	0.129196
YCR090C		protein_coding	III	Putative protein of unknown function; green fluorescent protein (GFP)-fusion protein localizes to the cytoplasm and nucleus; YCR090C is not an essential gene	324.665	-0.367927	0.123973	-2.96783	0.0029991	0.0229943
YCR091W	KIN82	protein_coding	III	Putative serine/threonine protein kinase; implicated in the regulation of phospholipid asymmetry through the activation of phospholipid translocases (flippases) Lem3p-Dnf1p/Dnf2p; KIN82 has a paralog, FPK1, that arose from the whole genome duplication	286.913	0.336546	0.257533	1.30983	0.190254	0.385505
YCR092C	MSH3	protein_coding	III	Mismatch repair protein; forms dimers with Msh2p that mediate repair of insertion or deletion mutations and removal of nonhomologous DNA ends, contains a PCNA (Pol30p) binding motif required for genome stability	324.6	-0.250424	0.13149	-1.9044	0.0568578	0.176434
YCR093W	CDC39	protein_coding	III	Component of the CCR4-NOT1 core complex; this complex has multiple roles in regulating mRNA levels including regulation of transcription and destabilizing mRNAs by deadenylation; basal transcription factor	4359.84	0.0206209	0.12381	0.166574	0.867705	0.934493
YCR094W	CDC50	protein_coding	III	Endosomal protein that interacts with phospholipid flippase Drs2p; interaction with Cdc50p is essential for Drs2p catalytic activity; mutations affect cell polarity and polarized growth; similar to Lem3p; CDC50 has a paralog, YNR048W, that arose from the whole genome duplication	274.467	0.084072	0.159612	0.526346	0.598647	0.76896
YCR095C	OCA4	protein_coding	III	Cytoplasmic protein required for replication of Brome mosaic virus; S. cerevisiae is a model system for studying replication of positive-strand RNA viruses in their natural hosts	334.031	0.18426	0.164102	1.12402	0.261003	0.465043
YCR095W-A		protein_coding	III	Putative protein of unknown function	11.9707	0.301239	0.474212	0.638338	0.523253	0.71497
YCR097W	HMRA1	protein_coding	III	Silenced copy of a1 at HMR; homeobox corepressor that interacts with Alpha2p to repress haploid-specific gene transcription in diploid cells	97.6969	0.0411512	0.700323	0.428132	0.668555	0.81677
YCR098C	GIT1	protein_coding	III	Plasma membrane permease; mediates uptake of glycerophosphoinositol and glycerophosphocholine as sources of the nutrients inositol and phosphate; expression and transport rate are regulated by phosphate and inositol availability	48.2247	2.35463	0.493125	4.69708	2.63902e-06	0.000118029
YCR099C		protein_coding	III	Putative protein of unknown function	34.7777	-0.881783	0.433128	-2.03118	0.0422371	0.143629
YCR100C		protein_coding	III	Putative protein of unknown function	57.1982	-0.869236	0.386434	-2.24077	0.0250412	0.101882
YCR101C		protein_coding	III	Putative protein of unknown function; localizes to the membrane fraction; YCR101C is not an essential gene	31.524	-0.885345	0.405322	-2.17877	0.029349	0.113121
YCR102C		protein_coding	III	Putative protein of unknown function; involved in copper metabolism; similar to C. carbonum toxD gene; member of the quinone oxidoreductase family	26.5212	1.02979	0.357255	2.85014	0.00436998	0.0303392
YCR102W-A		protein_coding	III	Dubious open reading frame; unlikely to encode a functional protein, based on available experimental and comparative sequence data	6.36844	0.513698	0.557733	0.894417	0.371099	0.580589
YCR104W	PAU3	protein_coding	III	Member of the seripauperin multigene family; encoded mainly in subtelomeric region; active during alcoholic fermentation; regulated by anaerobiosis; negatively regulated by oxygen; repressed by heme	3.80382	2.22535	0.655756	2.88818	0.00387475	0.0277436
YCR105W	ADH7	protein_coding	III	NADPH-dependent medium chain alcohol dehydrogenase; has broad substrate specificity; member of the cinnamyl family of alcohol dehydrogenases; may be involved in fusel alcohol synthesis or in aldehyde tolerance	16.6511	-0.126016	0.536637	-0.237019	0.812642	0.908464
YCR106W	RDS1	protein_coding	III	Putative zinc cluster transcription factor; involved in conferring resistance to cycloheximide	303.657	0.666089	0.548614	1.19753	0.2311	0.433277
YCR107W	AAD3	protein_coding	III	Putative aryl-alcohol dehydrogenase; similar to P. chrysosporium aryl-alcohol dehydrogenase; mutational analysis has not yet revealed a physiological role; AAD3 has a paralog, AAD15, that arose from a segmental duplication; members of the AAD gene family comprise three pairs (AAD3 + AAD15, AAD6/AAD16 + AAD4, AAD10 + AAD14) whose two genes are more related to one another than to other members of t…	144.945	0.838149	0.403063	2.0682	0.0386208	0.134743
YDL001W	RMD1	protein_coding	IV	Cytoplasmic protein required for sporulation	227.143	-0.177021	0.19176	-0.923514	0.355739	0.564863
YDL002C	NHP10	protein_coding	IV	Non-essential INO80 chromatin remodeling complex subunit; preferentially binds DNA ends, protecting them from exonucleatic cleavage; deletion affects telomere maintenance via recombination; related to mammalian high mobility group proteins	281.981	-0.198481	0.179172	-1.10757	0.268049	0.472415
YDL003W	MCD1	protein_coding	IV	Essential alpha-kleisin subunit of the cohesin complex; required for sister chromatid cohesion in mitosis and meiosis; apoptosis induces cleavage and translocation of a C-terminal fragment to mitochondria; expression peaks in S phase	360.231	-0.0936113	0.209981	-0.445535	0.655933	0.810008
YDL004W	ATP16	protein_coding	IV	Delta subunit of the central stalk of mitochondrial F1F0 ATP synthase; F1F0 ATP synthase is a large, evolutionarily conserved enzyme complex required for ATP synthesis; F1 translationally regulates ATP6 and ATP8 expression to achieve a balanced output of ATP synthase genes encoded in nucleus and mitochondria; phosphorylated	921.253	0.00371465	0.197264	0.0187756	0.98502	0.993493
YDL005C	MED2	protein_coding	IV	Subunit of the RNA polymerase II mediator complex; associates with core polymerase subunits to form the RNA polymerase II holoenzyme; essential for transcriptional regulation; relocalizes to the cytosol in response to hypoxia	380.279	0.127346	0.156135	0.816201	0.414385	0.621431
YDL006W	PTC1	protein_coding	IV	Type 2C protein phosphatase (PP2C); dephosphorylates Hog1p, inactivating osmosensing MAPK cascade; involved in Fus3p activation during pheromone response; deletion affects precursor tRNA splicing, mitochondrial inheritance, and sporulation	239.288	-0.153857	0.13691	-1.12372	0.261131	0.465136
YDL007W	RPT2	protein_coding	IV	ATPase of the 19S regulatory particle of the 26S proteasome; one of six ATPases of the regulatory particle; involved in the degradation of ubiquitinated substrates; required for normal peptide hydrolysis by the core 20S particle; N-myristoylation of Rpt2p at Gly2 is involved in regulating the proper intracellular distribution of proteasome activity by controlling the nuclear localization of the 2…	1238.04	0.031648	0.136233	0.232306	0.816301	0.909872
YDL008W	APC11	protein_coding	IV	Catalytic core subunit, Anaphase-Promoting Complex/Cyclosome (APC/C); which is a ubiquitin-protein ligase required for degradation of anaphase inhibitors, including mitotic cyclins, during the metaphase/anaphase transition; contains a RING-H2 domain that is required for activity	115.053	-0.404224	0.161062	-2.50993	0.0120754	0.0613221
YDL010W	GRX6	protein_coding	IV	Cis-golgi localized monothiol glutaredoxin, binds Fe-S cluster; more similar in activity to dithiol than other monothiol glutaredoxins; involved in the oxidative stress response; GRX6 has a paralog, GRX7, that arose from the whole genome duplication	171.565	0.189517	0.221413	0.855396	0.392332	0.601011
YDL012C		protein_coding	IV	Tail-anchored plasma membrane protein with a conserved CYSTM module; possibly involved in response to stress; may contribute to non-homologous end-joining (NHEJ) based on ydl012c htz1 double null phenotype; YDL012C has a paralog, YBR016W, that arose from the whole genome duplication	165.545	-0.148709	0.210436	-0.706724	0.479738	0.679855
YDL013W	SLX5	protein_coding	IV	Subunit of the Slx5-Slx8 SUMO-targeted ubiquitin ligase complex; stimulated by SUMO-modified substrates; contains a RING domain and two SIMs (SUMO-interacting motifs); forms SUMO-dependent nuclear foci, including DNA repair centers; the SUMO-targeted ubiquitin ligase complex is also known as the STUbL complex	453.779	0.0593766	0.140515	0.423919	0.671625	0.818253
YDL014W	NOP1	protein_coding	IV	Histone glutamine methyltransferase, modifies H2A at Q105 in nucleolus; component of the small subunit processome complex, which is required for processing of pre-18S rRNA; ortholog of mammalian fibrillarin	1729.9	-0.431647	0.254959	-1.69246	0.0905576	0.237522
YDL015C	TSC13	protein_coding	IV	Enoyl reductase; catalyzes the last step in each cycle of very long chain fatty acid elongation; localizes to the ER, highly enriched in a structure marking nuclear-vacuolar junctions; coimmunoprecipitates with elongases Fen1p and Sur4p; protein increases in abundance and relative distribution to ER foci increases upon DNA replication stress	1506.02	-0.0687209	0.124765	-0.550885	0.581712	0.756362
YDL016C		protein_coding	IV	Dubious open reading frame; unlikely to encode a functional protein, based on available experimental and comparative sequence data; partially overlaps the verified ORF CDC7/YDL153C, the catalytic subunit of a complex that regulates DNA replication	218.201	-0.203143	0.170357	-1.19273	0.232974	0.435336
YDL017W	CDC7	protein_coding	IV	DDK (Dbf4-dependent kinase) catalytic subunit; required for origin firing and replication fork progression in mitotic S phase through phosphorylation of Mcm2-7p complexes and Cdc45p; kinase activity correlates with cyclical DBF4 expression; required for pre-meiotic DNA replication, meiotic DSB formation, recruitment of the monopolin complex to kinetochores during meiosis I and as a gene-specific …	167.224	0.383926	0.144574	2.6556	0.00791685	0.0463155
YDL018C	ERP3	protein_coding	IV	Protein with similarity to Emp24p and Erv25p; member of the p24 family involved in ER to Golgi transport	218.365	-0.48361	0.14273	-3.38789	0.000704314	0.00835967
YDL019C	OSH2	protein_coding	IV	Member of an oxysterol-binding protein family with seven members; in S. cerevisiae, family members have overlapping, redundant functions in sterol metabolism and collectively perform a function essential for viability; OSH2 has a paralog, SWH1, that arose from the whole genome duplication	1276.2	0.0313946	0.145209	0.216227	0.828811	0.914611
YDL020C	RPN4	protein_coding	IV	Transcription factor that stimulates expression of proteasome genes; Rpn4p levels are in turn regulated by the 26S proteasome in a negative feedback control mechanism; RPN4 is transcriptionally regulated by various stress responses; relative distribution to the nucleus increases upon DNA replication stress	1241.32	0.149656	0.144845	1.03433	0.300982	0.50881
YDL021W	GPM2	protein_coding	IV	Homolog of Gpm1p phosphoglycerate mutase; converts 3-phosphoglycerate to 2-phosphoglycerate in glycolysis; may be non-functional; GPM2 has a paralog, GPM3, that arose from the whole genome duplication	111.768	-0.320601	0.24942	-1.28646	0.198282	0.394908
YDL022C-A		protein_coding	IV	Protein of unknown function; partially overlaps the verified gene DIA3; identified by fungal homology and RT-PCR; mRNA identified as translated by ribosome profiling data	5.83138	1.11798	0.692933	1.69195	0.0906546	0.237588
YDL022W	GPD1	protein_coding	IV	NAD-dependent glycerol-3-phosphate dehydrogenase; key enzyme of glycerol synthesis, essential for growth under osmotic stress; expression regulated by high-osmolarity glycerol response pathway; protein abundance increases in response to DNA replication stress; constitutively inactivated via phosphorylation by the protein kinases YPK1 and YPK2, dephosphorylation increases catalytic activity; GPD1 …	1197.46	-0.689179	0.265308	-2.59662	0.00941473	0.0520212
YDL024C	DIA3	protein_coding	IV	Protein of unknown function; involved in invasive and pseudohyphal growth	96.2597	1.54018	0.299526	5.12487	2.97737e-07	2.04181e-05
YDL025C	RTK1	protein_coding	IV	Putative protein kinase, potentially phosphorylated by Cdc28p; interacts with ribosome biogenesis factors, Cka2, Gus1 and Arc1; protein abundance increases in response to DNA replication stress	795.203	0.283329	0.345557	0.820827	0.411745	0.61939
YDL026W		protein_coding	IV	Dubious open reading frame; unlikely to encode a functional protein, based on available experimental and comparative sequence data	4.15803	0.0182217	0.717433	0.0813424	0.93517	0.969534
YDL027C		protein_coding	IV	Putative protein of unknown function; the authentic, non-tagged protein is detected in highly purified mitochondria in high-throughput studies; YDL027C is not an essential gene	397.471	0.299468	0.159229	1.88182	0.0598606	0.182341
YDL028C	MPS1	protein_coding	IV	Dual-specificity kinase; autophosphorylation required for function; required for spindle pole body (SPB) duplication and spindle checkpoint function; contributes to bi-orientation by promoting formation of force-generating kinetochore-microtubule attachments in meiosis I; substrates include SPB proteins Spc42p, Spc110p, and Spc98p, mitotic exit network protein Mob1p, kinetochore protein Cnn1p, an…	551.224	-0.0664325	0.140599	-0.472266	0.636737	0.794605
YDL029W	ARP2	protein_coding	IV	Essential component of the Arp2/3 complex; Arp2/3 is a highly conserved actin nucleation center required for the motility and integrity of actin patches; involved in endocytosis and membrane growth and polarity; required for efficient Golgi-to-ER trafficking in COPI mutants	1366.1	-0.0381286	0.136656	-0.279162	0.780121	0.890508
YDL030W	PRP9	protein_coding	IV	Subunit of the SF3a splicing factor complex; required for spliceosome assembly; acts after the formation of the U1 snRNP-pre-mRNA complex	258.422	-0.00177254	0.155433	-0.0107449	0.991427	0.996107
YDL031W	DBP10	protein_coding	IV	Putative ATP-dependent RNA helicase of the DEAD-box protein family; constituent of 66S pre-ribosomal particles; essential protein involved in ribosome biogenesis	1381.48	-0.112568	0.190954	-0.589487	0.555534	0.738491
YDL032W		protein_coding	IV	Dubious open reading frame; unlikely to encode a functional protein, based on available experimental and comparative sequence data; partially overlaps verified gene SLM3/YDL033C; YDL032W is not an essential gene	6.58906	1.3071	0.704294	2.28429	0.0223546	0.0941029
YDL033C	SLM3	protein_coding	IV	tRNA-specific 2-thiouridylase; responsible for 2-thiolation of the wobble base of mitochondrial tRNAs; human ortholog is implicated in myoclonus epilepsy associated with ragged red fibers (MERRF)	209.863	-0.160318	0.166765	-0.961709	0.336196	0.545622
YDL035C	GPR1	protein_coding	IV	Plasma membrane G protein coupled receptor (GPCR); interacts with the heterotrimeric G protein alpha subunit, Gpa2p, and with Plc1p; sensor that integrates nutritional signals with the modulation of cell fate via PKA and cAMP synthesis	1278.27	0.306657	0.112076	2.73784	0.00618438	0.0387512
YDL036C	PUS9	protein_coding	IV	Mitochondrial tRNA:pseudouridine synthase; catalyzes the formation of pseudouridine at position 32 in mitochondrial tRNAs; contains an N-terminal mitochondrial targeting sequence; PUS9 has a paralog, RIB2, that arose from the whole genome duplication	227.192	-0.568687	0.167571	-3.39311	0.000691043	0.00823382
YDL037C	BSC1	protein_coding	IV	Protein of unconfirmed function; similar to cell surface flocculin Flo11p; ORF exhibits genomic organization compatible with a translational readthrough-dependent mode of expression	73.588	-0.808236	0.38758	-2.09373	0.0362841	0.129598
YDL039C	PRM7	protein_coding	IV	Pheromone-regulated protein; predicted to have one transmembrane segment; promoter contains Gcn4p binding elements	182.434	-0.346741	0.405344	-0.857618	0.391103	0.600494
YDL040C	NAT1	protein_coding	IV	Subunit of protein N-terminal acetyltransferase NatA; NatA is comprised of Nat1p, Ard1p, and Nat5p; N-terminally acetylates many proteins, which influences multiple processes such as the cell cycle, heat-shock resistance, mating, sporulation, and telomeric silencing	2056.77	-0.377474	0.1145	-3.29667	0.000978396	0.0106502
YDL041W		protein_coding	IV	Dubious open reading frame; unlikely to encode a functional protein, based on available experimental and comparative sequence data; overlaps the verified gene SIR2/YDL042C	4.43142	-0.212499	0.735469	-0.298658	0.765201	0.8811
YDL042C	SIR2	protein_coding	IV	Conserved NAD+ dependent histone deacetylase of the Sirtuin family; involved in regulation of lifespan; plays roles in silencing at HML, HMR, telomeres, and the rDNA locus; negatively regulates initiation of DNA replication; functions as a regulator of autophagy like mammalian homolog SIRT1, and also of mitophagy; SIR2 has a paralog, HST1, that arose from the whole genome duplication	300.634	-0.0338522	0.148474	-0.228403	0.819333	0.910993
YDL043C	PRP11	protein_coding	IV	Subunit of the SF3a splicing factor complex; required for spliceosome assembly	157.804	-0.105222	0.178046	-0.590839	0.554628	0.738105
YDL044C	MTF2	protein_coding	IV	Mitochondrial protein that interacts with mitochondrial RNA polymerase; interacts with an N-terminal region of mitochondrial RNA polymerase (Rpo41p) and couples RNA processing and translation to transcription	253.931	0.162031	0.18375	0.883851	0.376777	0.585907
YDL045C	FAD1	protein_coding	IV	Flavin adenine dinucleotide (FAD) synthetase; performs the second step in synthesis of FAD from riboflavin	262.777	0.0156784	0.149452	0.105333	0.916112	0.961279
YDL045W-A	MRP10	protein_coding	IV	Mitochondrial ribosomal protein of the small subunit; contains twin cysteine-x9-cysteine motifs; oxidized by Mia40p during import into mitochondria	155.333	-0.383082	0.173542	-2.20768	0.0272667	0.107879
YDL046W	NPC2	protein_coding	IV	Functional homolog of human NPC2/He1; human NPC2 is a cholesterol-binding protein whose deficiency causes Niemann-Pick type C2 disease involving retention of cholesterol in lysosomes	588.105	0.219295	0.158704	1.38151	0.167122	0.357283
YDL047W	SIT4	protein_coding	IV	Type 2A-related serine-threonine phosphatase; functions in the G1/S transition of the mitotic cycle; regulator of COPII coat dephosphorylation; required for ER to Golgi traffic; interacts with Hrr25p kinase; cytoplasmic and nuclear protein that modulates functions mediated by Pkc1p including cell wall and actin cytoskeleton organization; similar to human PP6	582.024	-0.0746398	0.130966	-0.570077	0.568626	0.747006
YDL048C	STP4	protein_coding	IV	Protein containing a Kruppel-type zinc-finger domain; similar to Stp1p, Stp2p; predicted transcription factor; relative distribution to the nucleus increases upon DNA replication stress; STP4 has a paralog, STP3, that arose from the whole genome duplication	1095.59	0.35284	0.315943	1.11669	0.264128	0.468312
YDL049C	KNH1	protein_coding	IV	Protein with similarity to Kre9p; Kre9p is involved in cell wall beta 1,6-glucan synthesis; overproduction suppresses growth defects of a kre9 null mutant; required for propionic acid resistance	191.253	-0.804318	0.166316	-4.83338	1.34231e-06	7.08098e-05
YDL051W	LHP1	protein_coding	IV	RNA binding protein required for maturation of tRNA and U6 snRNA; acts as a molecular chaperone for RNAs transcribed by polymerase III; homologous to human La (SS-B) autoantigen	839.045	-0.437417	0.197824	-2.21094	0.0270402	0.107326
YDL052C	SLC1	protein_coding	IV	1-acyl-sn-glycerol-3-phosphate acyltransferase; catalyzes the acylation of lysophosphatidic acid to form phosphatidic acid, a key intermediate in lipid metabolism; enzymatic activity detected in lipid particles and microsomes	365.986	-0.43616	0.136731	-3.19007	0.00142238	0.0138251
YDL053C	PBP4	protein_coding	IV	Pbp1p binding protein; interacts strongly with Pab1p-binding protein 1 (Pbp1p) in the yeast two-hybrid system; also interacts with Lsm12p in a copurification assay; relative distribution to the nucleus increases upon DNA replication stress	472.984	0.087012	0.14724	0.590799	0.554655	0.738105
YDL054C	MCH1	protein_coding	IV	Protein with similarity to mammalian monocarboxylate permeases; monocarboxylate permeases are involved in transport of monocarboxylic acids across the plasma membrane but mutant is not deficient in monocarboxylate transport	735.836	1.03907	0.456253	2.28112	0.0225415	0.0945795
YDL055C	PSA1	protein_coding	IV	GDP-mannose pyrophosphorylase (mannose-1-phosphate guanyltransferase); synthesizes GDP-mannose from GTP and mannose-1-phosphate in cell wall biosynthesis; required for normal cell wall structure	8614.58	-0.639527	0.175962	-3.63399	0.000279077	0.00436067
YDL056W	MBP1	protein_coding	IV	Transcription factor; involved in regulation of cell cycle progression from G1 to S phase, forms a complex with Swi6p that binds to MluI cell cycle box regulatory element in promoters of DNA synthesis genes	777.176	-0.0177358	0.114492	-0.154697	0.87706	0.939098
YDL057W		protein_coding	IV	Putative protein of unknown function; YDL057W is not an essential gene	115.354	0.11074	0.195012	0.571369	0.567749	0.746199
YDL058W	USO1	protein_coding	IV	Essential protein involved in vesicle-mediated ER to Golgi transport; binds membranes and functions during vesicle docking to the Golgi; required for assembly of the ER-to-Golgi SNARE complex	1544.35	-0.204339	0.0973485	-2.099	0.0358166	0.128673
YDL059C	RAD59	protein_coding	IV	Protein involved DNA double-strand break repair; repairs breaks in DNA during vegetative growth via recombination and single-strand annealing; anneals complementary single-stranded DNA; forms nuclear foci upon DNA replication stress; required for loading of Rad52p to DSBs; paralog of Rad52p	174.811	0.415183	0.317028	1.32469	0.185273	0.380281
YDL060W	TSR1	protein_coding	IV	Protein required for processing of 20S pre-rRNA in the cytoplasm; associates with pre-40S ribosomal particles; inhibits the premature association of 60S subunits with assembling 40S subunits in the cytoplasm; similar to Bms1p; relocalizes from nucleus to cytoplasm upon DNA replication stress	1117.91	-0.251949	0.186072	-1.354	0.175738	0.368455
YDL061C	RPS29B	protein_coding	IV	Protein component of the small (40S) ribosomal subunit; homologous to mammalian ribosomal protein S29 and bacterial S14; RPS29B has a paralog, RPS29A, that arose from the whole genome duplication	763.994	-0.476807	0.1836	-2.59627	0.00942426	0.0520273
YDL062W		protein_coding	IV	Dubious open reading frame; unlikely to encode a functional protein, based on available experimental and comparative sequence data; partially overlaps uncharacterized ORF YDL063C; YDL062W is not essential	2.54504	0.386074	0.743148	0.6431	0.520159
YDL063C	SYO1	protein_coding	IV	Transport adaptor or symportin; facilitates synchronized nuclear coimport of the two 5S-rRNA binding proteins Rpl5p and Rpl11p; required for biogenesis of the large ribosomal subunit; green fluorescent protein (GFP)-fusion protein localizes to the cytoplasm and nucleus	1043.83	-0.0805643	0.214641	-0.375351	0.7074	0.842221
YDL064W	UBC9	protein_coding	IV	SUMO-conjugating enzyme involved in the Smt3p conjugation pathway; nuclear protein required for S- and M-phase cyclin degradation and mitotic control; involved in proteolysis mediated by the anaphase-promoting complex cyclosome (APCC)	298.934	-0.432768	0.168502	-2.56826	0.0102211	0.0550938
YDL065C	PEX19	protein_coding	IV	Chaperone and import receptor for newly-synthesized class I PMPs; binds peroxisomal membrane proteins (PMPs) in the cytoplasm and delivers them to the peroxisome for subsequent insertion into the peroxisomal membrane; interacts with Myo2p and contributes to peroxisome partitioning	203.934	-0.453524	0.224918	-2.01686	0.04371	0.147259
YDL066W	IDP1	protein_coding	IV	Mitochondrial NADP-specific isocitrate dehydrogenase; catalyzes the oxidation of isocitrate to alpha-ketoglutarate; not required for mitochondrial respiration and may function to divert alpha-ketoglutarate to biosynthetic processes	5890.15	0.699691	0.311965	2.24092	0.0250315	0.101882
YDL067C	COX9	protein_coding	IV	Subunit VIIa of cytochrome c oxidase (Complex IV); Complex IV is the terminal member of the mitochondrial inner membrane electron transport chain	427.909	0.902155	0.29463	3.061	0.00220598	0.0187693
YDL069C	CBS1	protein_coding	IV	Mitochondrial translational activator of the COB mRNA; membrane protein that interacts with translating ribosomes, acts on the COB mRNA 5'-untranslated leader	113.583	0.215029	0.241095	0.892994	0.371861	0.581486
YDL070W	BDF2	protein_coding	IV	Protein involved in transcription initiation; acts at TATA-containing promoters; associates with the basal transcription factor TFIID; contains two bromodomains; corresponds to the C-terminal region of mammalian TAF1; redundant with Bdf1p; protein abundance increases in response to DNA replication stress; BDF2 has a paralog, BDF1, that arose from the whole genome duplication	2034.45	0.476658	0.191608	2.48796	0.0128477	0.0639998
YDL071C		protein_coding	IV	Dubious open reading frame; unlikely to encode a functional protein, based on available experimental and comparative sequence data; partially overlaps the verified ORF BDF2/YDL070W	4.69115	-0.23348	0.595356	-0.396252	0.691919	0.832182
YDL072C	YET3	protein_coding	IV	Protein of unknown function; YET3 null mutant decreases the level of secreted invertase; homolog of human BAP31 protein; protein abundance increases in response to DNA replication stress	876.089	0.291903	0.174145	1.67647	0.0936461	0.243456
YDL073W		protein_coding	IV	Putative protein of unknown function; YDL073W is not an essential gene	643.264	0.315829	0.114139	2.76825	0.00563585	0.0364236
YDL074C	BRE1	protein_coding	IV	E3 ubiquitin ligase; forms heterodimer with Rad6p to monoubiquinate histone H2B-K123, which is required for the subsequent methylation of histone H3-K4 and H3-K79; required for DSBR, transcription, silencing, and checkpoint control; interacts with RNA-binding protein Npl3p, linking histone ubiquitination to mRNA processing; Bre1p-dependent histone ubiquitination promotes pre-mRNA splicing	1588.6	0.0401433	0.101912	0.394216	0.693422	0.832877
YDL075W	RPL31A	protein_coding	IV	Ribosomal 60S subunit protein L31A; associates with karyopherin Sxm1p; loss of both Rpl31p and Rpl39p confers lethality; homologous to mammalian ribosomal protein L31, no bacterial homolog; RPL31A has a paralog, RPL31B, that arose from the whole genome duplication	4550.93	-0.554199	0.219601	-2.52289	0.0116395	0.0601668
YDL076C	RXT3	protein_coding	IV	Component of the Rpd3L histone deacetylase complex; involved in histone deacetylation; protein abundance increases in response to DNA replication stress	275.074	0.286905	0.164283	1.74671	0.0806873	0.220497
YDL077C	VAM6	protein_coding	IV	Subunit of the HOPS endocytic tethering complex; vacuole membrane protein that functions as a Rab GTPase effector, interacting with both GTP- and GDP-bound conformations of Ypt7p, facilitating tethering and promoting several membrane fusion events at the late endosome and vacuole; required for both membrane and protein trafficking	598.184	-0.215882	0.118036	-1.8289	0.067414	0.197662
YDL078C	MDH3	protein_coding	IV	Peroxisomal malate dehydrogenase; catalyzes interconversion of malate and oxaloacetate; involved in the glyoxylate cycle	920.988	-0.224401	0.159263	-1.40922	0.158771	0.345373
YDL079C	MRK1	protein_coding	IV	Glycogen synthase kinase 3 (GSK-3) homolog; one of four GSK-3 homologs in S. cerevisiae that function to activate Msn2p-dependent transcription of stress responsive genes and that function in protein degradation; MRK1 has a paralog, RIM11, that arose from the whole genome duplication	96.6869	0.478876	0.242494	1.98308	0.0473582	0.155476
YDL080C	THI3	protein_coding	IV	Regulatory protein that binds Pdc2p and Thi2p transcription factors; activates thiamine biosynthesis transcription factors Pdc2p and Thi2p by binding to them, but releases and de-activates them upon binding to thiamine pyrophosphate (TPP), the end product of the pathway; has similarity to decarboxylases but enzymatic activity is not detected	393.396	-0.00322042	0.145555	-0.0221121	0.982359	0.993444
YDL081C	RPP1A	protein_coding	IV	Ribosomal stalk protein P1 alpha; involved in the interaction between translational elongation factors and the ribosome; free (non-ribosomal) P1 stimulates the phosphorylation of the eIF2 alpha subunit (Sui2p) by Gcn2p; accumulation of P1 in the cytoplasm is regulated by phosphorylation and interaction with the P2 stalk component	5694.02	-0.218653	0.184274	-1.18643	0.235454	0.43822
YDL082W	RPL13A	protein_coding	IV	Ribosomal 60S subunit protein L13A; not essential for viability; homologous to mammalian ribosomal protein L13, no bacterial homolog; RPL13A has a paralog, RPL13B, that arose from the whole genome duplication	3688.62	-0.704353	0.232884	-3.02362	0.00249773	0.020394
YDL083C	RPS16B	protein_coding	IV	Protein component of the small (40S) ribosomal subunit; homologous to mammalian ribosomal protein S16 and bacterial S9; RPS16B has a paralog, RPS16A, that arose from the whole genome duplication	3439.66	-0.643708	0.200205	-3.21437	0.00130733	0.0131844
YDL084W	SUB2	protein_coding	IV	Component of the TREX complex required for nuclear mRNA export; member of the DEAD-box RNA helicase superfamily and is involved in early and late steps of spliceosome assembly; homolog of the human splicing factor hUAP56; relocalizes from nucleus to cytoplasm upon DNA replication stress	4464.75	-0.277319	0.171183	-1.61986	0.105262	0.263132
YDL085C-A		protein_coding	IV	Putative protein of unknown function; green fluorescent protein (GFP)-fusion protein localizes to the cytoplasm and nucleus	186.789	0.181087	0.169764	1.06357	0.287523	0.493903
YDL085W	NDE2	protein_coding	IV	Mitochondrial external NADH dehydrogenase; catalyzes the oxidation of cytosolic NADH; Nde1p and Nde2p are involved in providing the cytosolic NADH to the mitochondrial respiratory chain; NDE2 has a paralog, NDE1, that arose from the whole genome duplication	45.6954	0.899228	0.40163	2.22886	0.0258229	0.104033
YDL086C-A		protein_coding	IV	Dubious open reading frame; unlikely to encode a functional protein, based on available experimental and comparative sequence data; overlaps uncharacterized ORF YDL086W; identified by gene-trapping, microarray expression analysis, and genome-wide homology searching	13.9048	-0.199844	0.438817	-0.453497	0.650191	0.804849
YDL086W		protein_coding	IV	Putative carboxymethylenebutenolidase; the authentic, non-tagged protein is detected in highly purified mitochondria in high-throughput studies; YDL086W is not an essential gene	514.697	0.381548	0.137414	2.77531	0.00551484	0.0359983
YDL087C	LUC7	protein_coding	IV	Essential protein associated with the U1 snRNP complex; splicing factor involved in recognition of 5' splice site; contains two zinc finger motifs; N-terminal zinc finger binds pre-mRNA; relocalizes to the cytosol in response to hypoxia	137.388	-0.0456369	0.15945	-0.285668	0.775133	0.887703
YDL088C	ASM4	protein_coding	IV	FG-nucleoporin component of central core of nuclear pore complex (NPC); contributes directly to nucleocytoplasmic transport; induces membrane tubulation, which may contribute to nuclear pore assembly; ASM4 has a paralog, NUP53, that arose from the whole genome duplication	574.861	0.131166	0.120758	1.0869	0.277081	0.482819
YDL089W	NUR1	protein_coding	IV	Protein of unknown function; interacts with Csm1p, Lrs4p; required for rDNA repeat stability; null mutant causes increase in unequal sister-chromatid exchange; GFP-fusion protein localizes to the nuclear periphery, possible Cdc28p substrate	197.944	-0.216195	0.147954	-1.46127	0.14394	0.325064
YDL090C	RAM1	protein_coding	IV	Beta subunit of the CAAX farnesyltransferase (FTase); this complex prenylates the a-factor mating pheromone and Ras proteins; required for the membrane localization of Ras proteins and a-factor; homolog of the mammalian FTase beta subunit	213.818	-0.261097	0.159432	-1.63784	0.101454	0.256226
YDL091C	UBX3	protein_coding	IV	Subunit of the DSC ubiquitin ligase complex; UBX (ubiquitin regulatory X) domain-containing protein that interacts with Cdc48p; green fluorescent protein (GFP)-fusion protein localizes to the cytoplasm in a punctate pattern; ortholog of fission yeast Ucp10	164.624	-0.0664867	0.171875	-0.387268	0.698558	0.836534
YDL092W	SRP14	protein_coding	IV	Signal recognition particle (SRP) subunit; interacts with the RNA component of SRP to form the Alu domain, which is the region of SRP responsible for arrest of nascent chain elongation during membrane targeting; homolog of mammalian SRP14	309.039	-0.0766032	0.144479	-0.530526	0.595747	0.76692
YDL093W	PMT5	protein_coding	IV	Protein O-mannosyltransferase; transfers mannose residues from dolichyl phosphate-D-mannose to protein serine/threonine residues; acts in a complex with Pmt3p, can instead interact with Pmt2p in some conditions; target for new antifungals	400.592	-0.0265955	0.131792	-0.202295	0.839686	0.919869
YDL094C		protein_coding	IV	Dubious open reading frame; unlikely to encode a functional protein, based on available experimental and comparative sequence data; partially overlaps verfied gene PMT5/YDL093W; YDL094C is not essential	6.55721	-0.534591	0.58324	-0.900542	0.367832	0.577527
YDL095W	PMT1	protein_coding	IV	Protein O-mannosyltransferase of the ER membrane; transfers mannose from dolichyl phosphate-D-mannose to protein serine and threonine residues; 1 of 7 related proteins involved in O-glycosylation which is essential for cell wall rigidity; involved in ER quality control; amino terminus faces cytoplasm, carboxyl terminus faces ER lumen	2374.91	-0.255948	0.141976	-1.80268	0.0714378	0.205076
YDL097C	RPN6	protein_coding	IV	Essential, non-ATPase regulatory subunit of the 26S proteasome lid; required for the assembly and activity of the 26S proteasome; the human homolog (S9 protein) partially rescues Rpn6p depletion; protein abundance increases in response to DNA replication stress	1041.76	-0.0841629	0.170489	-0.493665	0.621543	0.78305
YDL098C	SNU23	protein_coding	IV	Component of the U4/U6.U5 snRNP complex; involved in mRNA splicing via spliceosome	72.2183	-0.397886	0.232019	-1.71471	0.0863992	0.230448
YDL099W	BUG1	protein_coding	IV	Cis-golgi localized protein involved in ER to Golgi transport; forms a complex with the mammalian GRASP65 homolog, Grh1p; mutants are compromised for the fusion of ER-derived vesicles with Golgi membranes	243.792	-0.193526	0.17592	-1.09964	0.271487	0.476164
YDL100C	GET3	protein_coding	IV	Guanine nucleotide exchange factor for Gpa1p; amplifies G protein signaling; functions as a chaperone under ATP-depleted oxidative stress conditions; subunit of the GET complex, which is involved in ATP dependent Golgi to ER trafficking and insertion of tail-anchored (TA) proteins into the ER membrane under non-stress conditions; has low-level ATPase activity; protein abundance increases in respo…	1648.24	-0.175205	0.160733	-1.09008	0.27568	0.481465
YDL101C	DUN1	protein_coding	IV	Cell-cycle checkpoint serine-threonine kinase; required for DNA damage-induced transcription of certain target genes, phosphorylation of Rad55p and Sml1p, and transient G2/M arrest after DNA damage; Mec1p and Dun1p function in same pathway to regulate both dNTP pools and telomere length; also regulates postreplicative DNA repair	226.278	-0.391029	0.177821	-2.19955	0.027839	0.109122
YDL102W	POL3	protein_coding	IV	Catalytic subunit of DNA polymerase delta; required for chromosomal DNA replication during mitosis and meiosis, intragenic recombination, repair of double strand DNA breaks, and DNA replication during nucleotide excision repair (NER)	668.145	-0.23889	0.173062	-1.38041	0.167461	0.357637
YDL103C	QRI1	protein_coding	IV	UDP-N-acetylglucosamine pyrophosphorylase; catalyzes the formation of UDP-N-acetylglucosamine (UDP-GlcNAc), which is important in cell wall biosynthesis, protein N-glycosylation, and GPI anchor biosynthesis; protein abundance increases in response to DNA replication stress	593.231	-0.126029	0.16723	-0.753674	0.451045	0.654561
YDL104C	QRI7	protein_coding	IV	Protein involved in threonylcarbamoyl adenosine biosynthesis; Sua5p and Qri7p are necessary and sufficient for RNA t6A modification in vitro; highly conserved mitochondrial protein; essential for t6A modification of mitochondrial tRNAs that decode ANN codons; similar to Kae1p and E. coli YgjD, both of which are also required for tRNA t6A modification; when directed to the cytoplasm, complements t…	89.7408	-0.449057	0.262702	-1.70979	0.0873044	0.23186
YDL105W	NSE4	protein_coding	IV	Component of the SMC5-SMC6 complex; this complex plays a key role in the removal of X-shaped DNA structures that arise between sister chromatids during DNA replication and repair	152.857	0.196846	0.187013	1.05414	0.291818	0.499612
YDL106C	PHO2	protein_coding	IV	Homeobox transcription factor; regulatory targets include genes involved in phosphate metabolism; binds cooperatively with Pho4p to the PHO5 promoter; phosphorylation of Pho2p facilitates interaction with Pho4p; relocalizes to the cytosol in response to hypoxia	428.117	0.0111668	0.189939	0.0609427	0.951405	0.979168
YDL107W	MSS2	protein_coding	IV	Peripherally bound inner membrane protein of the mitochondrial matrix; involved in membrane insertion of C-terminus of Cox2p, interacts genetically and physically with Cox18p	99.645	0.0103645	0.205392	0.0502849	0.959895	0.984132
YDL108W	KIN28	protein_coding	IV	Serine/threonine protein kinase, subunit of transcription factor TFIIH; involved in transcription initiation at RNA polymerase II promoters; phosphorylates Ser5 residue of the PolII C-terminal domain (CTD) at gene promoters; relocalizes to the cytosol in response to hypoxia	224.218	0.248019	0.137943	1.7981	0.072161	0.206226
YDL109C		protein_coding	IV	Putative lipase; involved in lipid metabolism; not an essential gene; YDL109C has a paralog, ROG1, that arose from the whole genome duplication	207.39	-0.0638507	0.194656	-0.326093	0.744354	0.869117
YDL110C	TMA17	protein_coding	IV	ATPase dedicated chaperone that adapts proteasome assembly to stress; Tma17p is induced upon stress; interacts with Rpt6p to assist its pairing to Rpt3p and early steps in proteasome biogenesis; associates with ribosomes; heterozygous deletion demonstrated increases in chromosome instability in a rad9 deletion background; protein abundance is decreased upon intracellular iron depletion	298.27	-0.45671	0.236549	-1.92989	0.0536205	0.169099
YDL111C	RRP42	protein_coding	IV	Exosome non-catalytic core component; involved in 3'-5' RNA processing and degradation in both the nucleus and the cytoplasm; has similarity to E. coli RNase PH and to human hRrp42p (EXOSC7)	614.961	-0.081336	0.130193	-0.6247	0.532168	0.722163
YDL112W	TRM3	protein_coding	IV	2'-O-ribose methyltransferase; catalyzes the ribose methylation of the guanosine nucleotide at position 18 of tRNAs	1542.52	0.0115003	0.183129	0.062806	0.949921	0.978457
YDL113C	ATG20	protein_coding	IV	Sorting nexin family member; required for the cytoplasm-to-vacuole targeting (Cvt) pathway and for endosomal sorting; has a Phox homology domain that binds phosphatidylinositol-3-phosphate; interacts with Snx4p; potential Cdc28p substrate	627.639	0.290346	0.200277	1.45074	0.146853	0.328416
YDL114W		protein_coding	IV	Putative short-chain dehydrogenase/reductase; YDL114W is not an essential gene	9.93661	0.235113	0.572433	0.440255	0.659752	0.812124
YDL115C	IWR1	protein_coding	IV	RNA polymerase II transport factor, conserved from yeast to humans; also has a role in transporting RNA polymerase III into the nucleus; interacts with most of the RNAP II subunits; nucleo-cytoplasmic shuttling protein; deletion causes hypersensitivity to K1 killer toxin; protein increases in abundance and relocalizes from nucleus to cytoplasm upon DNA replication stress	267.195	0.525881	0.189921	2.76998	0.00560603	0.0363069
YDL116W	NUP84	protein_coding	IV	Subunit of the Nup84p subcomplex of the nuclear pore complex (NPC); contributes to nucleocytoplasmic transport and NPC biogenesis; also plays roles in several processes that may require localization of genes or chromosomes at the nuclear periphery, including double-strand break repair, transcription and chromatin silencing; homologous to human NUP107	1210.59	-0.0346551	0.129255	-0.268018	0.788686	0.894197
YDL117W	CYK3	protein_coding	IV	SH3-domain protein located in the bud neck and cytokinetic actin ring; relocalizes from bud neck to nucleus upon DNA replication stress; activates the chitin synthase activity of Chs2p during cytokinesis; suppressor of growth and cytokinesis defects of chs2 phospho-mutants	908.543	-0.0862057	0.141564	-0.608922	0.542576	0.730805
YDL119C		protein_coding	IV	Putative mitochondrial transport protein; GFP-fusion protein is induced in response to the DNA-damaging agent MMS; the authentic, non-tagged protein is detected in purified mitochondria	122.137	0.315434	0.207204	1.52244	0.127898	0.301864
YDL120W	YFH1	protein_coding	IV	Mitochondrial matrix iron chaperone; oxidizes and stores iron; interacts with Isu1p to promote Fe-S cluster assembly; mutation results in multiple Fe/S-dependent enzyme deficiencies; human frataxin homolog is mutated in Friedrich's ataxia	290.241	-0.370575	0.128781	-2.87772	0.00400565	0.0284171
YDL121C		protein_coding	IV	Putative protein of unknown function; green fluorescent protein (GFP)-fusion protein localizes to the endoplasmic reticulum; YDL121C is not an essential protein	374.931	-0.043822	0.201487	-0.21749	0.827826	0.914611
YDL122W	UBP1	protein_coding	IV	Ubiquitin-specific protease; removes ubiquitin from ubiquitinated proteins; cleaves at the C terminus of ubiquitin fusions irrespective of their size; capable of cleaving polyubiquitin chains	1647.3	0.0770178	0.164478	0.468303	0.639568	0.796491
YDL123W	SNA4	protein_coding	IV	Protein of unknown function; localized to the vacuolar outer membrane; predicted to be palmitoylated	127.82	0.282118	0.263776	1.0735	0.283046	0.48866
YDL124W		protein_coding	IV	NADPH-dependent alpha-keto amide reductase; reduces aromatic alpha-keto amides, aliphatic alpha-keto esters, and aromatic alpha-keto esters; member of the aldo-keto reductase (AKR) family; protein abundance increases in response to DNA replication stress	3857.56	0.29929	0.27525	1.08768	0.276736	0.482819
YDL125C	HNT1	protein_coding	IV	Adenosine 5'-monophosphoramidase; interacts physically and genetically with Kin28p, a CDK and TFIIK subunit, and genetically with CAK1; member of the histidine triad (HIT) superfamily of nucleotide-binding proteins and similar to Hint; protein abundance increases in response to DNA replication stress	957.405	-0.0281508	0.189246	-0.148706	0.881786	0.940795
YDL126C	CDC48	protein_coding	IV	AAA ATPase; subunit of polyubiquitin-selective segregase complex involved in ERAD, cell wall integrity during heat stress, mitotic spindle disassembly; subunit of complex involved in mitochondria-associated degradation; role in mobilizing membrane bound transcription factors by regulated ubiquitin/proteasome-dependent processing, in macroautophagy, PMN, RAD, ribophagy, homotypic ER membrane fusio…	7651.67	0.116971	0.151943	0.769779	0.441431	0.645925
YDL127W	PCL2	protein_coding	IV	Cyclin, interacts with cyclin-dependent kinase Pho85p; member of the Pcl1,2-like subfamily, involved in the regulation of polarized growth and morphogenesis and progression through the cell cycle; localizes to sites of polarized cell growth; PCL2 has a paralog, PCL9, that arose from the whole genome duplication	175.403	-0.137953	0.23974	-0.575726	0.564801	0.745345
YDL128W	VCX1	protein_coding	IV	Vacuolar membrane antiporter with Ca2+/H+ and K+/H+ exchange activity; involved in control of cytosolic Ca2+ and K+ concentrations; has similarity to sodium/calcium exchangers, including the bovine Na+/Ca2+,K+ antiporter	1583.62	0.00228256	0.170652	0.0133934	0.989314	0.99528
YDL129W		protein_coding	IV	Protein of unknown function; green fluorescent protein (GFP)-fusion protein localizes to the cytoplasm and the nucleus; YDL129W is not an essential gene; relative distribution to the nucleus increases upon DNA replication stress	144.521	-0.299896	0.246904	-1.21387	0.224798	0.425599
YDL130W	RPP1B	protein_coding	IV	Ribosomal protein P1 beta; component of the ribosomal stalk, which is involved in interaction of translational elongation factors with ribosome; free (non-ribosomal) P1 stimulates the phosphorylation of the eIF2 alpha subunit (Sui2p) by Gcn2p; accumulation is regulated by phosphorylation and interaction with the P2 stalk component	2706.43	-0.527947	0.216001	-2.44345	0.0145476	0.0700921
YDL130W-A	STF1	protein_coding	IV	Protein involved in regulation of the mitochondrial F1F0-ATP synthase; Stf1p and Stf2p act as stabilizing factors that enhance inhibitory action of the Inh1p protein; protein abundance increases in response to DNA replication stress; STF1 has a paralog, INH1, that arose from the whole genome duplication	136.795	0.684744	0.256734	2.66617	0.00767199	0.0452904
YDL131W	LYS21	protein_coding	IV	Homocitrate synthase isozyme; catalyzes the condensation of acetyl-CoA and alpha-ketoglutarate to form homocitrate, which is the first step in the lysine biosynthesis pathway; LYS21 has a paralog, LYS20, that arose from the whole genome duplication	1958.69	0.403994	0.360739	1.11984	0.262784	0.466868
YDL132W	CDC53	protein_coding	IV	Cullin; structural protein of SCF complexes (which also contain Skp1p, Cdc34p, Hrt1p and an F-box protein) involved in ubiquitination; SCF promotes the G1-S transition by targeting G1 cyclins and the Cln-CDK inhibitor Sic1p for degradation	1157.12	-0.137651	0.118209	-1.16443	0.24425	0.447333
YDL133C-A	RPL41B	protein_coding	IV	Ribosomal 60S subunit protein L41B; comprises only 25 amino acids; rpl41a rpl41b double null mutant is viable; homologous to mammalian ribosomal protein L41, no bacterial homolog; RPL41B has a paralog, RPL41A, that arose from the whole genome duplication	753.973	-0.0749534	0.25302	-0.296246	0.767042	0.88228
YDL133W	SRF1	protein_coding	IV	Regulator of phospholipase D (Spo14p); interacts with Spo14p and regulates its catalytic activity; capable of buffering the toxicity of C16:0 platelet activating factor, a lipid that accumulates intraneuronally in Alzheimer's patients	371.523	-0.201769	0.132614	-1.52118	0.128214	0.302383
YDL134C	PPH21	protein_coding	IV	Catalytic subunit of protein phosphatase 2A (PP2A); functionally redundant with Pph22p; methylated at C terminus; forms alternate complexes with several regulatory subunits; involved in signal transduction and regulation of mitosis; forms nuclear foci upon DNA replication stress; PPH21 has a paralog, PPH22, that arose from the whole genome duplication	969.84	-0.107019	0.108002	-0.990628	0.321867	0.528482
YDL135C	RDI1	protein_coding	IV	Rho GDP dissociation inhibitor; involved in the localization and regulation of Cdc42p and Rho1p; protein abundance increases in response to DNA replication stress	414.371	-0.296559	0.134192	-2.20996	0.0271082	0.107458
YDL136W	RPL35B	protein_coding	IV	Ribosomal 60S subunit protein L35B; homologous to mammalian ribosomal protein L35 and bacterial L29; RPL35B has a paralog, RPL35A, that arose from the whole genome duplication	287.028	-0.667822	0.198875	-3.35711	0.00078761	0.00910324
YDL137W	ARF2	protein_coding	IV	ADP-ribosylation factor; GTPase of the Ras superfamily involved in regulation of coated formation vesicles in intracellular trafficking within the Golgi; ARF2 has a paralog, ARF1, that arose from the whole genome duplication	1640.98	0.0424343	0.15353	0.276214	0.782384	0.892171
YDL138W	RGT2	protein_coding	IV	Plasma membrane high glucose sensor that regulates glucose transport; contains 12 predicted transmembrane segments and a long C-terminal tail required for induction of hexose transporters; RGT2 has a paralog, SNF3, that arose from the whole genome duplication	489.75	0.349432	0.186445	1.87504	0.0607869	0.184
YDL139C	SCM3	protein_coding	IV	Nonhistone component of centromeric chromatin; binds to histone H3 variant, Cse4p, and recruits it to centromeres; involved in the assembly and maintenance of Cse4-H4 at centromeres; required for kinetochore assembly and G2/M progression; may protect Cse4p from ubiquitylation; homolog of mammalian HJURP	80.9766	0.0436829	0.2322	0.189399	0.84978	0.924853
YDL140C	RPO21	protein_coding	IV	RNA polymerase II largest subunit B220; part of central core; phosphorylation of C-terminal heptapeptide repeat domain regulates association with transcription and splicing factors; similar to bacterial beta-prime	4108.55	0.378512	0.215106	1.75983	0.0784365	0.216993
YDL141W	BPL1	protein_coding	IV	Biotin:apoprotein ligase; covalently modifies proteins with the addition of biotin, required for acetyl-CoA carboxylase (Acc1p) holoenzyme formation	585.445	0.0998232	0.151353	0.659272	0.509721	0.703017
YDL142C	CRD1	protein_coding	IV	Cardiolipin synthase; produces cardiolipin, which is a phospholipid of the mitochondrial inner membrane that is required for normal mitochondrial membrane potential and function; required to maintain tubular mitochondrial morphology and functions in mitochondrial fusion; also required for normal vacuolar ion homeostasis	207.118	-0.00574165	0.249228	-0.0227771	0.981828	0.993444
YDL143W	CCT4	protein_coding	IV	Subunit of the cytosolic chaperonin Cct ring complex; related to Tcp1p, required for the assembly of actin and tubulins in vivo	1431.68	-0.387258	0.182037	-2.12724	0.0334001	0.12344
YDL144C		protein_coding	IV	Protein of unknown function; green fluorescent protein (GFP)-fusion protein localizes to the cytoplasm and nucleus; YDL144C is not an essential gene; protein abundance increases in response to DNA replication stress	199.589	-0.0226676	0.182988	-0.124576	0.900859	0.951882
YDL145C	COP1	protein_coding	IV	Alpha subunit of COPI vesicle coatomer complex; complex surrounds transport vesicles in the early secretory pathway	5281.64	-0.302846	0.161561	-1.87443	0.0608707	0.184081
YDL146W	LDB17	protein_coding	IV	Protein involved in the regulation of endocytosis; transiently recruited to actin cortical patches in a SLA1-dependent manner after late coat component assembly; GFP-fusion protein localizes to the periphery, cytoplasm, bud, and bud neck	253.307	-0.171189	0.134383	-1.27468	0.202421	0.400045
YDL147W	RPN5	protein_coding	IV	Subunit of the CSN and 26S proteasome lid complexes; similar to mammalian p55 subunit and to another S. cerevisiae regulatory subunit, Rpn7p; Rpn5p is an essential protein; the COP9 signalosome is also known as the CSN	2409.83	0.146088	0.118545	1.2325	0.217763	0.41805
YDL148C	NOP14	protein_coding	IV	Nucleolar protein; forms a complex with Noc4p that mediates maturation and nuclear export of 40S ribosomal subunits; also present in the small subunit processome complex, which is required for processing of pre-18S rRNA	1022.22	-0.237556	0.193835	-1.22561	0.220346	0.42103
YDL149W	ATG9	protein_coding	IV	Transmembrane protein involved in forming Cvt and autophagic vesicles; cycles between the phagophore assembly site (PAS) and other cytosolic punctate structures, not found in autophagosomes; may be involved in membrane delivery to the PAS	384.754	-0.0734862	0.186248	-0.392877	0.69441	0.83367
YDL150W	RPC53	protein_coding	IV	RNA polymerase III subunit C53	568.899	-0.209379	0.152431	-1.3737	0.169535	0.36065
YDL151C	BUD30	protein_coding	IV	Dubious open reading frame; unlikely to encode a functional protein, based on available experimental and comparative sequence data; not conserved in closely related Saccharomyces species; 96% of ORF overlaps the verified gene RPC53; diploid mutant displays a weak budding pattern phenotype in a systematic assay	1.63672	-0.0511644	0.711228	-0.112943	0.910075
YDL153C	SAS10	protein_coding	IV	Subunit of U3-containing Small Subunit (SSU) processome complex; involved in production of 18S rRNA and assembly of small ribosomal subunit; disrupts silencing when overproduced; mutant has increased aneuploidy tolerance; essential gene	237.286	0.112535	0.282926	0.397948	0.690668	0.831605
YDL154W	MSH5	protein_coding	IV	Protein of the MutS family; forms a dimer with Msh4p that facilitates crossovers between homologs during meiosis; msh5-Y823H mutation confers tolerance to DNA alkylating agents; homologs present in C. elegans and humans	128.555	-0.373955	0.208887	-1.78973	0.0734973	0.208467
YDL155W	CLB3	protein_coding	IV	B-type cyclin involved in cell cycle progression; activates Cdc28p to promote the G2/M transition; may be involved in DNA replication and spindle assembly; accumulates during S phase and G2, then targeted for ubiquitin-mediated degradation; relative distribution to the nucleus increases upon DNA replication stress; CLB3 has a paralog, CLB4, that arose from the whole genome duplication	485.807	0.14817	0.131068	1.13031	0.258346	0.461864
YDL156W	CMR1	protein_coding	IV	DNA-binding protein with preference for UV-damaged DNA; protein sequence contains three WD domains (WD-40 repeat); green fluorescent protein (GFP)-fusion protein localizes to the cytoplasm and nucleus; potential regulatory target of Mbp1p, which binds to the promoter region; co-localizes with Hos2p in nuclear foci in response to DNA damage by MMS	181.937	-0.174012	0.143067	-1.21625	0.22389	0.424662
YDL157C		protein_coding	IV	Putative protein of unknown function; the authentic, non-tagged protein is detected in highly purified mitochondria in high-throughput studies	243.284	-0.18917	0.213592	-0.885451	0.375913	0.585302
YDL158C		protein_coding	IV	Dubious open reading frame; unlikely to encode a functional protein, based on available experimental and comparative sequence data	91.9612	-0.118506	0.283072	-0.419016	0.675204	0.82098
YDL159W	STE7	protein_coding	IV	Signal transducing MAP kinase kinase; involved in pheromone response where it phosphorylates Fus3p; involved in the pseudohyphal/invasive growth pathway where it phosphorylates of Kss1p; phosphorylated by Ste11p; degraded by ubiquitin pathway	393.077	0.410404	0.147534	2.78374	0.00537356	0.0353955
YDL160C	DHH1	protein_coding	IV	Cytoplasmic DExD/H-box helicase, stimulates mRNA decapping; coordinates distinct steps in mRNA function and decay, interacts with both the decapping and deadenylase complexes, role in translational repression, mRNA decay, and processing body dynamics; may have a role in mRNA export; C-terminus of Dhh1p interacts with Ngr1p and promotes POR1, but not EDC1 mRNA decay; forms cytoplasmic foci upon DN…	1912.84	0.0600169	0.129675	0.462874	0.643455	0.800071
YDL160C-A	MHF2	protein_coding	IV	Component of the heterotetrameric MHF histone-fold complex; in humans the MHF complex interacts with both DNA and Mph1p ortholog FANCM to stabilize and remodel blocked replication forks and repair damaged DNA; mhf2 srs2 double mutants are MMS hypersensitive; orthologous to human centromere constitutive-associated network (CCAN) subunit CENP-X, also known as MHF2	23.4545	-0.0635533	0.331084	-0.193369	0.84667	0.92374
YDL161W	ENT1	protein_coding	IV	Epsin-like protein involved in endocytosis and actin patch assembly; functionally redundant with Ent2p; binds clathrin via a clathrin-binding domain motif at C-terminus; relocalizes from bud neck to cytoplasm upon DNA replication stress; ENT1 has a paralog, ENT2, that arose from the whole genome duplication	346.728	0.0490792	0.122981	0.399265	0.689698	0.8309
YDL164C	CDC9	protein_coding	IV	DNA ligase found in the nucleus and mitochondria; an essential enzyme that joins Okazaki fragments during DNA replication; also acts in ribonucleotide excision repair, base excision repair, and recombination,	378.111	-0.174443	0.152778	-1.14203	0.253442	0.457113
YDL165W	CDC36	protein_coding	IV	Component of the CCR4-NOT core complex; this complex has multiple roles in regulating mRNA levels including regulation of transcription and destabilizing mRNAs through deadenylation; basal transcription factor	379.537	0.144852	0.136412	1.06192	0.288271	0.494912
YDL166C	FAP7	protein_coding	IV	Essential NTPase required for small ribosome subunit synthesis; mediates processing of the 20S pre-rRNA at site D in the cytoplasm but associates only transiently with 43S preribosomes via Rps14p, may be the endonuclease for site D; depletion leads to accumulation of pre-40S ribosomes in 80S-like ribosomes	178.657	-0.259402	0.196819	-1.31845	0.187354	0.382517
YDL167C	NRP1	protein_coding	IV	Putative RNA binding protein of unknown function; localizes to stress granules induced by glucose deprivation; predicted to be involved in ribosome biogenesis	717.648	-0.122294	0.203801	-0.60007	0.54846	0.733975
YDL168W	SFA1	protein_coding	IV	Bifunctional alcohol dehydrogenase and formaldehyde dehydrogenase; formaldehyde dehydrogenase activity is glutathione-dependent; functions in formaldehyde detoxification and formation of long chain and complex alcohols, regulated by Hog1p-Sko1p; protein abundance increases in response to DNA replication stress	366.174	-0.166293	0.202428	-0.821614	0.411296	0.61931
YDL169C	UGX2	protein_coding	IV	Protein of unknown function; transcript accumulates in response to any combination of stress conditions	58.1594	0.211081	0.381006	0.552715	0.580458	0.756167
YDL170W	UGA3	protein_coding	IV	Transcriptional activator for GABA-dependent induction of GABA genes; binds to DNA elements found in the promoters of target genes and increases their expression in the presence of GABA (gamma-aminobutyrate); zinc finger transcription factor of the Zn(2)-Cys(6) binuclear cluster domain type; localized to the nucleus; examples of GABA genes include UGA1, UGA2, and UGA4	1472.82	1.37268	0.540813	2.56404	0.0103463	0.0554719
YDL171C	GLT1	protein_coding	IV	NAD(+)-dependent glutamate synthase (GOGAT); synthesizes glutamate from glutamine and alpha-ketoglutarate; with Gln1p, forms the secondary pathway for glutamate biosynthesis from ammonia; expression regulated by nitrogen source; assembles into filaments as cells approach stationary phase and under cytosolic acidification and starvation conditions	12905	0.108127	0.125622	0.860684	0.389412	0.599664
YDL172C		protein_coding	IV	Dubious open reading frame; unlikely to encode a functional protein, based on available experimental and comparative sequence data	4.09131	-0.622481	0.716302	-0.967989	0.33305	0.54237
YDL173W	PAR32	protein_coding	IV	Putative protein of unknown function; hyperphosphorylated upon rapamycin treatment in a Tap42p-dependent manner; green fluorescent protein (GFP)-fusion protein localizes to the cytoplasm; PAR32 is not an essential gene	622.196	0.241446	0.176202	1.36994	0.170704	0.362086
YDL174C	DLD1	protein_coding	IV	D-lactate dehydrogenase; oxidizes D-lactate to pyruvate, transcription is heme-dependent, repressed by glucose, and derepressed in ethanol or lactate; located in the mitochondrial inner membrane	929.836	-0.954314	0.168316	-5.66912	1.4353e-08	1.6405e-06
YDL175C	AIR2	protein_coding	IV	RNA-binding subunit of the TRAMP nuclear RNA surveillance complex; involved in nuclear RNA processing and degradation; involved in TRAMP complex assembly as a bridge between Mtr4p and Trf4p; stimulates the poly(A) polymerase activity of Pap2p in vitro; has 5 zinc knuckle motifs; AIR2 has a paralog, AIR1, that arose from the whole genome duplication; Air2p and Air1p have nonredundant roles in regu…	219.19	0.0629368	0.172779	0.364151	0.715745	0.84823
YDL176W		protein_coding	IV	Protein of unknown function; predicted by computational methods to be involved in fructose-1,6-bisphosphatase (Fbp1p) degradation; interacts with components of the GID complex; YDL176W is not an essential gene	332.365	0.401003	0.159444	2.51583	0.0118751	0.0610048
YDL177C		protein_coding	IV	Putative protein of unknown function; similar to the mouse IMPACT gene; YDL177C is not an essential gene	134.335	0.712689	0.288068	2.47368	0.0133728	0.0657664
YDL178W	DLD2	protein_coding	IV	D-lactate dehydrogenase; located in the mitochondrial matrix	735.171	-0.675153	0.169008	-3.99466	6.47862e-05	0.00145404
YDL179W	PCL9	protein_coding	IV	Cyclin; forms a functional kinase complex with Pho85p cyclin-dependent kinase (Cdk), expressed in late M/early G1 phase, activated by Swi5p; PCL9 has a paralog, PCL2, that arose from the whole genome duplication	266.818	0.0874269	0.184152	0.473512	0.635848	0.794177
YDL180W		protein_coding	IV	Putative protein of unknown function; green fluorescent protein (GFP)-fusion protein localizes to the vacuole	396.004	-0.0376744	0.220936	-0.16964	0.865293	0.933343
YDL181W	INH1	protein_coding	IV	Protein that inhibits ATP hydrolysis by the F1F0-ATP synthase; inhibitory function is enhanced by stabilizing proteins Stf1p and Stf2p; has a calmodulin-binding motif and binds calmodulin in vitro; INH1 has a paralog, STF1, that arose from the whole genome duplication	235.052	0.290145	0.324645	0.892071	0.372355	0.581669
YDL182W	LYS20	protein_coding	IV	Homocitrate synthase isozyme; catalyzes the condensation of acetyl-CoA and alpha-ketoglutarate to form homocitrate, which is the first step in the lysine biosynthesis pathway; LYS20 has a paralog, LYS21, that arose from the whole genome duplication	1457.92	0.69786	0.612921	1.13052
YDL183C		protein_coding	IV	Protein that may form an active mitochondrial KHE system; mitochondrial inner-membrane protein; non-essential gene; KHE system stands for K+/H+ exchanger system	98.5613	0.351386	0.293813	1.19723	0.231218	0.433367
YDL184C	RPL41A	protein_coding	IV	Ribosomal 60S subunit protein L41A; comprises only 25 amino acids; rpl41a rpl41b double null mutant is viable; homologous to mammalian ribosomal protein L41, no bacterial homolog; RPL41A has a paralog, RPL41B, that arose from the whole genome duplication	71.7959	-0.307544	0.345538	-0.885829	0.37571	0.58528
YDL185W	VMA1	protein_coding	IV	Subunit A of the V1 peripheral membrane domain of V-ATPase; protein precursor undergoes self-catalyzed splicing to yield the extein Tfp1p and the intein Vde (PI-SceI), which is a site-specific endonuclease; the V1 peripheral membrane domain of the vacuolar H+-ATPase (V-ATPase) has eight subunits; involved in methionine restriction extension of chronological lifespan in an autophagy-dependent mann…	12578.8	-0.263305	0.153454	-1.7158	0.0861985	0.230111
YDL186W		protein_coding	IV	Putative protein of unknown function; YDL186W is not an essential gene	5.50927	-0.558373	0.664023	-0.855613	0.392212	0.601011
YDL187C		protein_coding	IV	Dubious open reading frame; unlikely to encode a functional protein, based on available experimental and comparative sequence data	20.6009	-0.0464595	0.347375	-0.137985	0.890252	0.945883
YDL188C	PPH22	protein_coding	IV	Catalytic subunit of protein phosphatase 2A (PP2A); functionally redundant with Pph21p; methylated at C terminus; forms alternate complexes with several regulatory subunits; involved in signal transduction and regulation of mitosis; protein abundance increases in response to DNA replication stress; PPH22 has a paralog, PPH21, that arose from the whole genome duplication	531.164	-0.177193	0.136302	-1.30024	0.19352	0.390201
YDL189W	RBS1	protein_coding	IV	Protein of unknown function; identified as a high copy suppressor of psk1 psk2 mutations that confer temperature-sensitivity for galactose utilization; proposed to bind single-stranded nucleic acids via its R3H domain	579.552	0.154795	0.136552	1.13345	0.257026	0.45995
YDL190C	UFD2	protein_coding	IV	Ubiquitin chain assembly factor (E4); cooperates with a ubiquitin-activating enzyme (E1), a ubiquitin-conjugating enzyme (E2), and a ubiquitin protein ligase (E3) to conjugate ubiquitin to substrates; also functions as an E3	1436.73	0.0350203	0.115229	0.304099	0.761053	0.879299
YDL191W	RPL35A	protein_coding	IV	Ribosomal 60S subunit protein L35A; homologous to mammalian ribosomal protein L35 and bacterial L29; RPL35A has a paralog, RPL35B, that arose from the whole genome duplication	562.892	-0.686709	0.188269	-3.64643	0.000265913	0.00420824
YDL192W	ARF1	protein_coding	IV	ADP-ribosylation factor; GTPase of the Ras superfamily involved in regulation of coated vesicle formation in intracellular trafficking within the Golgi; ARF1 has a paralog, ARF2, that arose from the whole genome duplication	2872.25	-0.454948	0.160424	-2.83571	0.00457243	0.0313567
YDL193W	NUS1	protein_coding	IV	Putative prenyltransferase; required for cell viability; proposed to be involved in protein trafficking because tet-repressible mutant shows accumulation of hypoglycosylated forms of CPY	356.076	-0.172987	0.143633	-1.20427	0.228487	0.430865
YDL194W	SNF3	protein_coding	IV	Plasma membrane low glucose sensor, regulates glucose transport; contains 12 predicted transmembrane segments and a long C-terminal tail required for induction of hexose transporters; also senses fructose and mannose; SNF3 has a paralog, RGT2, that arose from the whole genome duplication	204.786	0.118616	0.186625	0.639224	0.522677	0.714499
YDL195W	SEC31	protein_coding	IV	Component of the Sec13p-Sec31p complex of the COPII vesicle coat; COPII coat is required for vesicle formation in ER to Golgi transport; mutant has increased aneuploidy tolerance	2492.1	0.0556988	0.160163	0.347779	0.728006	0.85704
YDL196W		protein_coding	IV	Dubious open reading frame; unlikely to encode a functional protein, based on available experimental and comparative sequence data; open reading frame is located in promoter region of essential gene SEC31	2.76784	0.465456	0.723273	0.732289	0.463992
YDL197C	ASF2	protein_coding	IV	Anti-silencing protein; causes derepression of silent loci when overexpressed	363.366	-0.0869082	0.174771	-0.496454	0.619574	0.78235
YDL198C	GGC1	protein_coding	IV	Mitochondrial GTP/GDP transporter; essential for mitochondrial genome maintenance; has a role in mitochondrial iron transport; member of the mitochondrial carrier family	1171.55	0.450561	0.523212	0.859504	0.390062	0.600082
YDL199C		protein_coding	IV	Putative transporter; member of the sugar porter family	279.13	0.311696	0.279849	1.11866	0.263287	0.467225
YDL200C	MGT1	protein_coding	IV	DNA repair methyltransferase (6-O-methylguanine-DNA methylase); involved in protection against DNA alkylation damage	107.921	0.677266	0.256817	2.63156	0.00849928	0.0485568
YDL201W	TRM8	protein_coding	IV	Noncatalytic subunit of a tRNA methyltransferase complex; Trm8p and Trm82p comprise an enzyme that catalyzes a methyl-transfer from S-adenosyl-l-methionine to the N(7) atom of guanine at position 46 in tRNA; Trm8 lacks catalytic activity if not bound to Trm82p	498.035	-0.380503	0.224782	-1.69229	0.0905908	0.237522
YDL202W	MRPL11	protein_coding	IV	Mitochondrial ribosomal protein of the large subunit; localizes to vacuole in response to H2O2	227.451	-0.21323	0.202604	-1.0527	0.292478	0.500309
YDL203C	ACK1	protein_coding	IV	Protein that functions in the cell wall integrity pathway; functions upstream of Pkc1p; GFP-fusion protein expression is induced in response to the DNA-damaging agent MMS; non-tagged Ack1p is detected in purified mitochondria	451.709	0.161761	0.11178	1.44748	0.147763	0.330194
YDL204W	RTN2	protein_coding	IV	Reticulon protein; stabilizes membrane curvature; involved in nuclear pore assembly and maintenance of tubular ER morphology; interacts with exocyst subunit Sec6p, Yip3p, and Sbh1p; much less abundant than Rtn1p; rtn1 rtn2 yop1 triple mutant lacks tubular ER; member of RTNLA (reticulon-like A) subfamily; protein increases in abundance and relocalizes to plasma membrane upon DNA replication stress…	396.42	0.448043	0.210763	2.13021	0.0331544	0.122679
YDL205C	HEM3	protein_coding	IV	Porphobilinogen deaminase; catalyzes the conversion of 4-porphobilinogen to hydroxymethylbilane, the third step in heme biosynthesis; localizes to the cytoplasm and nucleus; expression is regulated by Hap2p-Hap3p, but not by levels of heme	634.508	-0.135969	0.145188	-0.936725	0.3489	0.557752
YDL206W		protein_coding	IV	Putative protein of unknown function; YDL206W is not an essential protein	331.343	0.131766	0.168008	0.785157	0.432362	0.638101
YDL207W	GLE1	protein_coding	IV	Cytoplasmic nucleoporin required for polyadenylated mRNA export; contains a nuclear export signal; when bound to inositol hexakisphosphate (IP6), functions as an activator for the Dbp5p ATPase activity at the nuclear pore complex during mRNA export; mediates translation initiation; required for efficient translation termination	315.774	0.104947	0.162821	0.644735	0.519099	0.711957
YDL208W	NHP2	protein_coding	IV	Protein related to mammalian high mobility group (HMG) proteins; nuclear protein; essential for function of H/ACA-type snoRNPs, which are involved in 18S rRNA processing	884.942	-0.347166	0.199452	-1.74037	0.0817934	0.222147
YDL209C	CWC2	protein_coding	IV	Member of the NineTeen Complex (NTC); this complex contains Prp19p and stabilizes U6 snRNA in catalytic forms of the spliceosome containing U2, U5, and U6 snRNAs; binds directly to U6 snRNA; similar to S. pombe Cwf2	122.298	-0.0962367	0.202969	-0.474386	0.635225	0.794177
YDL210W	UGA4	protein_coding	IV	GABA (gamma-aminobutyrate) permease; serves as a GABA transport protein involved in the utilization of GABA as a nitrogen source; catalyzes the transport of putrescine and delta-aminolevulinic acid (ALA); localized to the vacuolar membrane	80.1865	2.31052	0.578902	3.9248	8.68002e-05	0.00180381
YDL211C		protein_coding	IV	Protein of unknown function; green fluorescent protein (GFP)-fusion protein localizes to the vacuole; YDL211C has a paralog, TDA7, that arose from the whole genome duplication	59.5348	-0.319854	0.263016	-1.21557	0.22415	0.425024
YDL212W	SHR3	protein_coding	IV	Endoplasmic reticulum packaging chaperone; required for incorporation of amino acid permeases into COPII coated vesicles for transport to the cell surface	1338.65	0.00707159	0.164788	0.0428542	0.965818	0.985294
YDL213C	NOP6	protein_coding	IV	rRNA-binding protein required for 40S ribosomal subunit biogenesis; contains an RNA recognition motif (RRM); hydrophilin essential to overcome the stress of the desiccation-rehydration process; NOP6 may be a fungal-specific gene as no homologs have been yet identified in higher eukaryotes	228.238	0.134468	0.218552	0.615228	0.538404	0.727618
YDL214C	PRR2	protein_coding	IV	Serine/threonine protein kinase; inhibits pheromone induced signalling downstream of MAPK, possibly at the level of the Ste12p transcription factor; mutant has increased aneuploidy tolerance; PRR2 has a paralog, NPR1, that arose from the whole genome duplication	57.6227	1.00866	0.303603	3.33936	0.000839731	0.00961562
YDL215C	GDH2	protein_coding	IV	NAD(+)-dependent glutamate dehydrogenase; degrades glutamate to ammonia and alpha-ketoglutarate; expression sensitive to nitrogen catabolite repression and intracellular ammonia levels; genetically interacts with GDH3 by suppressing stress-induced apoptosis	1758.87	0.820573	0.215071	3.81588	0.000135699	0.00251227
YDL216C	RRI1	protein_coding	IV	Catalytic subunit of the COP9 signalosome (CSN) complex; acts as an isopeptidase in cleaving the ubiquitin-like protein Nedd8 from SCF ubiquitin ligases; metalloendopeptidase involved in the adaptation to pheromone signaling	117.145	-0.28143	0.209651	-1.34182	0.179653	0.373547
YDL217C	TIM22	protein_coding	IV	Essential core component of the mitochondrial TIM22 complex; involved in insertion of polytopic proteins into the inner membrane; forms the channel through which proteins are imported	163.926	0.105811	0.149864	0.705381	0.480573	0.68061
YDL218W		protein_coding	IV	Putative protein of unknown function; YDL218W transcription is regulated by Azf1p and induced by starvation and aerobic conditions; expression also induced in cells treated with the mycotoxin patulin	20.4241	0.126283	0.363918	0.344862	0.730198	0.858717
YDL219W	DTD1	protein_coding	IV	D-Tyr-tRNA(Tyr) deacylase; functions in protein translation, may affect nonsense suppression via alteration of the protein synthesis machinery; ubiquitous among eukaryotes	185.262	-0.347219	0.202948	-1.71003	0.0872598	0.23186
YDL220C	CDC13	protein_coding	IV	Single stranded DNA-binding protein found at TG1-3 telomere G-tails; key roles in regulation of telomerase, telomere end protection, conventional telomere replication; regulates telomere replication through recruitment of specific sub-complexes, essential function is telomere capping; forms homodimer via N-terminus; disruption of dimerization leads to short telomeres; autophagy and proteasome are…	237.845	-0.0238509	0.157573	-0.151747	0.879387	0.940271
YDL221W		protein_coding	IV	Dubious open reading frame; unlikely to encode a functional protein, based on available experimental and comparative sequence data; partially overlaps the 3' end of essential gene CDC13	5.48175	-0.350521	0.615524	-0.568212	0.569891	0.748057
YDL222C	FMP45	protein_coding	IV	Integral membrane protein localized to mitochondria; required for sporulation and maintaining sphingolipid content; similar to SUR7; FMP45 has a paralog, YNL194C, that arose from the whole genome duplication	116.28	0.68662	0.35646	1.93462	0.0530374	0.167929
YDL223C	HBT1	protein_coding	IV	Shmoo tip protein, substrate of Hub1p ubiquitin-like protein; mutants are defective for mating projection formation, thereby implicating Hbt1p in polarized cell morphogenesis; HBT1 has a paralog, YNL195C, that arose from the whole genome duplication	547.395	0.734085	0.249097	2.95063	0.00317123	0.0239277
YDL224C	WHI4	protein_coding	IV	Putative RNA binding protein; regulates the cell size requirement for passage through Start and commitment to cell division; WHI4 has a paralog, WHI3, that arose from the whole genome duplication	898.42	0.153872	0.119655	1.28645	0.198286	0.394908
YDL225W	SHS1	protein_coding	IV	Component of the septin ring that is required for cytokinesis; septins are GTP-binding proteins that assemble into rod-like hetero-oligomers that can associate with other rods to form filaments; septin rings at the mother-bud neck act as scaffolds for recruiting cell division factors and as barriers to prevent diffusion of specific proteins; undergoes sumoylation and phosphorylation during mitosi…	724.79	0.106599	0.154241	0.691453	0.489281	0.686973
YDL226C	GCS1	protein_coding	IV	ADP-ribosylation factor GTPase activating protein (ARF GAP); involved in ER-Golgi transport; required for prospore membrane formation; regulates phospholipase Spo14p; shares functional similarity with Glo3p; GCS1 has a paralog, SPS18, that arose from the whole genome duplication	659.767	-0.0106632	0.109733	-0.0976492	0.922211	0.964073
YDL227C	HO	protein_coding	IV	Site-specific endonuclease; required for gene conversion at the MAT locus (homothallic switching) through the generation of a ds DNA break; expression restricted to mother cells in late G1 as controlled by Swi4p-Swi6p, Swi5p, and Ash1p	471.466	-1.02054	0.358576	-2.83448	0.00459002	0.0314269
YDL229W	SSB1	protein_coding	IV	Cytoplasmic ATPase that is a ribosome-associated molecular chaperone; functions with J-protein partner Zuo1p; may be involved in folding of newly-made polypeptide chains; member of the HSP70 family; interacts with phosphatase subunit Reg1p; SSB1 has a paralog, SSB2, that arose from the whole genome duplication	12518.1	-0.712492	0.249236	-2.85736	0.00427186	0.0299662
YDL230W	PTP1	protein_coding	IV	Phosphotyrosine-specific protein phosphatase; dephosphorylates a broad range of substrates in vivo, including Fpr3p; localized to the cytoplasm and the mitochondria; proposed to be a negative regulator of filamentation	177.699	-0.159872	0.160953	-0.993115	0.320654	0.527343
YDL231C	BRE4	protein_coding	IV	Zinc finger protein containing five transmembrane domains; null mutant exhibits strongly fragmented vacuoles and sensitivity to brefeldin A, a drug which is known to affect intracellular transport	1460.95	0.529255	0.164482	3.21773	0.00129209	0.0130734
YDL232W	OST4	protein_coding	IV	Subunit of the oligosaccharyltransferase complex of the ER lumen; complex catalyzes protein asparagine-linked glycosylation; type I membrane protein required for incorporation of Ost3p or Ost6p into the OST complex	49.8073	-0.557473	0.234783	-2.37405	0.0175939	0.0798065
YDL233W	MFG1	protein_coding	IV	Regulator of filamentous growth; interacts with FLO11 promoter and regulates FLO11 expression; binds to transcription factors Flo8p and Mss11p; green fluorescent protein (GFP)-fusion protein localizes to the nucleus; YDL233W is not an essential gene	181.24	0.251425	0.209449	1.20346	0.228797	0.431055
YDL234C	GYP7	protein_coding	IV	GTPase-activating protein for yeast Rab family members; members include Ypt7p (most effective), Ypt1p, Ypt31p, and Ypt32p (in vitro); involved in vesicle mediated protein trafficking	1293.57	0.338178	0.215467	1.57093	0.1162	0.281338
YDL235C	YPD1	protein_coding	IV	Osmotic stress-responsive phosphorelay intermediate sensor protein; phosphorylated by the plasma membrane sensor Sln1p in response to osmotic stress and then in turn phosphorylates the response regulators Ssk1p in the cytosol and Skn7p in the nucleus	317.884	-0.0162284	0.141486	-0.114546	0.908805	0.956655
YDL236W	PHO13	protein_coding	IV	Alkaline phosphatase specific for p-nitrophenyl phosphate; also has protein phosphatase activity	762.621	0.202516	0.154626	1.30917	0.190478	0.385695
YDL237W	AIM6	protein_coding	IV	Putative protein of unknown function; required for respiratory growth; YDL237W is not an essential gene	712.21	0.16108	0.164576	0.978274	0.327939	0.536454
YDL238C	GUD1	protein_coding	IV	Guanine deaminase; a catabolic enzyme of the guanine salvage pathway producing xanthine and ammonia from guanine; activity is low in exponentially-growing cultures but expression is increased in post-diauxic and stationary-phase cultures	329.671	0.493126	0.331545	1.48783	0.136796	0.314871
YDL239C	ADY3	protein_coding	IV	Protein required for spore wall formation; thought to mediate assembly of a Don1p-containing structure at the leading edge of the prospore membrane via interaction with spindle pole body components; potentially phosphorylated by Cdc28p; ADY3 has a paralog, CNM67, that arose from the whole genome duplication	496.131	0.728868	0.308302	2.36566	0.0179978	0.081082
YDL240W	LRG1	protein_coding	IV	GTPase-activating protein (GAP); contains Rho1p-specific GAP activity, interacting with activated forms of Rho1p; functions along with Sac7p as a negative regulator of the Pkc1p-mediated cell wall integrity signaling pathway; negative regulator of cell wall 1,3-beta-glucan biosynthesis; required for efficient cell fusion; contains a RhoGAP domain and three Lin-11-Isl1-Mec-3 (LIM) domains	661.876	-0.283255	0.15231	-1.85965	0.0629347	0.188835
YDL241W		protein_coding	IV	Putative protein of unknown function; YDL241W is not an essential gene	12.6321	-0.087526	0.462915	-0.183984	0.854026	0.927511
YDL242W		protein_coding	IV	Dubious open reading frame; unlikely to encode a functional protein, based on available experimental and comparative sequence data	3.60022	0.424933	0.727016	0.69505	0.487024	0.686595
YDL243C	AAD4	protein_coding	IV	Putative aryl-alcohol dehydrogenase; involved in oxidative stress response; similar to P. chrysosporium aryl-alcohol dehydrogenase; expression induced in cells treated with the mycotoxin patulin; members of the AAD gene family comprise three pairs (AAD3 + AAD15, AAD6/AAD16 + AAD4, AAD10 + AAD14) whose two genes are more related to one another than to other members of the family	59.5184	0.783582	0.290036	2.70205	0.00689124	0.0418629
YDL244W	THI13	protein_coding	IV	Protein involved in synthesis of the thiamine precursor HMP; member of a subtelomeric gene family including THI5, THI11, THI12, and THI13; hydroxymethylpyrimidine is also known as HMP	6.39835	1.47969	0.634426	2.1951	0.0281563	0.109918
YDL245C	HXT15	protein_coding	IV	Protein of unknown function with similarity to hexose transporters; expression is induced by low levels of glucose and repressed by high levels of glucose	1.4301	-0.0814401	0.725428	-0.115145	0.90833
YDL248W	COS7	protein_coding	IV	Protein of unknown function; member of the DUP380 subfamily of conserved, often subtelomerically-encoded proteins; the authentic, non-tagged protein is detected in highly purified mitochondria in high-throughput studies	44.7602	-2.09536	0.476495	-4.33122	1.48286e-05	0.000448638
YDR001C	NTH1	protein_coding	IV	Neutral trehalase, degrades trehalose; required for thermotolerance and may mediate resistance to other cellular stresses; may be phosphorylated by Cdc28p; inhibited by Dcs1p; NTH1 has a paralog, NTH2, that arose from the whole genome duplication	3234.99	0.464392	0.137749	3.37194	0.000746405	0.00874157
YDR002W	YRB1	protein_coding	IV	Ran GTPase binding protein; involved in nuclear protein import and RNA export, ubiquitin-mediated protein degradation during the cell cycle; shuttles between the nucleus and cytoplasm; is essential; homolog of human RanBP1	1962.93	-0.222663	0.217599	-1.02318	0.306221	0.514004
YDR003W	RCR2	protein_coding	IV	Vacuolar protein; presumably functions within the endosomal-vacuolar trafficking pathway, affecting events that determine whether plasma membrane proteins are degraded or routed to the plasma membrane; RCR2 has a paralog, RCR1, that arose from the whole genome duplication	281.419	0.136418	0.160246	0.853477	0.393395	0.601784
YDR003W-A		protein_coding	IV	Putative protein of unknown function; identified by expression profiling and mass spectrometry	66.4193	0.741486	0.298063	2.49613	0.0125557	0.0630545
YDR004W	RAD57	protein_coding	IV	Protein that stimulates strand exchange; stimulates strand exchange by stabilizing the binding of Rad51p to single-stranded DNA; involved in the recombinational repair of double-strand breaks in DNA during vegetative growth and meiosis; forms heterodimer with Rad55p	171.119	0.183685	0.197253	0.930582	0.35207	0.560767
YDR005C	MAF1	protein_coding	IV	Highly conserved negative regulator of RNA polymerase III; involved in tRNA processing and stability; inhibits tRNA degradation via rapid tRNA decay (RTD) pathway; binds N-terminal domain of Rpc160p subunit of Pol III to prevent closed-complex formation; localization and activity are regulated by phosphorylation, mediated by TORC1, protein kinase A, and Sch9p; localizes to cytoplasm during vegeta…	498.391	0.00316302	0.153272	0.0209278	0.983303	0.993444
YDR006C	SOK1	protein_coding	IV	Protein of unknown function; overexpression suppresses the growth defect of mutants lacking protein kinase A activity; involved in cAMP-mediated signaling; localized to the nucleus; similar to the mouse testis-specific protein PBS13	1468.09	0.397628	0.124506	3.1944	0.00140122	0.0137058
YDR007W	TRP1	protein_coding	IV	Phosphoribosylanthranilate isomerase; catalyzes the third step in tryptophan biosynthesis; in 2004, the sequence of TRP1 from strain S228C was updated by changing the previously annotated internal STOP (TAA) to serine (TCA)	31.7807	0.248566	0.621746	0.548477	0.583364	0.757208
YDR009W	GAL3	protein_coding	IV	Transcriptional regulator; involved in activation of the GAL genes in response to galactose; forms a complex with Gal80p to relieve Gal80p inhibition of Gal4p; binds galactose and ATP but does not have galactokinase activity; GAL3 has a paralog, GAL1, that arose from the whole genome duplication	42.4218	0.578931	0.317591	1.82895	0.0674076	0.197662
YDR010C		protein_coding	IV	Dubious open reading frame; unlikely to encode a functional protein, based on available experimental and comparative sequence data	4.24103	0.592004	0.688254	0.937369	0.348569	0.557494
YDR011W	SNQ2	protein_coding	IV	Plasma membrane ATP-binding cassette (ABC) transporter; multidrug transporter involved in multidrug resistance and resistance to singlet oxygen species	3571.01	0.452697	0.309387	1.46457	0.143038	0.323976
YDR012W	RPL4B	protein_coding	IV	Ribosomal 60S subunit protein L4B; homologous to mammalian ribosomal protein L4 and bacterial L4; RPL4B has a paralog, RPL4A, that arose from the whole genome duplication	1206.13	-0.663776	0.144482	-4.59362	4.35617e-06	0.000179242
YDR013W	PSF1	protein_coding	IV	Subunit of the GINS complex (Sld5p, Psf1p, Psf2p, Psf3p); complex is localized to DNA replication origins and implicated in assembly of the DNA replication machinery	162.551	0.187429	0.176006	1.06559	0.286607	0.492878
YDR014W	RAD61	protein_coding	IV	Subunit of a complex that inhibits sister chromatid cohesion; also negatively regulates chromosome condensation; inhibited by Eco1p-acetylated cohesin subunits Smc3p and Mcd1p; binds Smc3p ATPase head of cohesin; related to the human Wapl protein that controls the association of cohesin with chromatin	269.31	0.108938	0.141004	0.77367	0.439126	0.644198
YDR014W-A	HED1	protein_coding	IV	Meiosis-specific protein; down-regulates Rad51p-mediated mitotic recombination when the meiotic recombination machinery is impaired; prevents the recruitment of Rad54p to site-specific DNA double-strand breaks in vivo; early meiotic gene, transcribed specifically during meiotic prophase	6.2015	-0.356023	0.616163	-0.575905	0.56468	0.745345
YDR016C	DAD1	protein_coding	IV	Essential subunit of the Dam1 complex (aka DASH complex); complex couples kinetochores to the force produced by MT depolymerization thereby aiding in chromosome segregation; is transferred to the kinetochore prior to mitosis	81.1644	0.031164	0.286785	0.107157	0.914665	0.960087
YDR017C	KCS1	protein_coding	IV	Inositol hexakisphosphate and inositol heptakisphosphate kinase; generation of high energy inositol pyrophosphates by Kcs1p is required for many processes such as vacuolar biogenesis, stress response, and telomere maintenance; inositol hexakisphosphate is also known as IP6; inositol heptakisphosphate is also known as IP7	1114.79	-0.191749	0.139674	-1.37286	0.169795	0.360873
YDR018C		protein_coding	IV	Probable membrane protein with three predicted transmembrane domains; similar to C. elegans F55A11.5 and maize 1-acyl-glycerol-3-phosphate acyltransferase; YDR018C has a paralog, CST26, that arose from the whole genome duplication	46.7089	1.15985	0.316047	3.66134	0.000250901	0.00401182
YDR019C	GCV1	protein_coding	IV	T subunit of the mitochondrial glycine decarboxylase complex; glycine decarboxylase is required for the catabolism of glycine to 5,10-methylene-THF; expression is regulated by levels of levels of 5,10-methylene-THF in the cytoplasm	2652.6	-0.187735	0.346025	-0.542447	0.58751	0.76067
YDR020C	DAS2	protein_coding	IV	Putative protein of unknown function; non-essential gene identified in a screen for mutants with increased levels of rDNA transcription; weak similarity with uridine kinases and with phosphoribokinases	147.134	-0.325714	0.175974	-1.85057	0.0642317	0.191794
YDR021W	FAL1	protein_coding	IV	Nucleolar protein required for maturation of 18S rRNA; member of the eIF4A subfamily of DEAD-box ATP-dependent RNA helicases	245.299	-0.476714	0.221286	-2.15517	0.0311487	0.117369
YDR022C	ATG31	protein_coding	IV	Autophagy-specific protein required for autophagosome formation; may form a complex with Atg17p and Atg29p that localizes other proteins to the pre-autophagosomal structure; high-copy suppressor of CIK1 deletion	92.0996	0.392525	0.221787	1.76592	0.0774092	0.2156
YDR023W	SES1	protein_coding	IV	Cytosolic seryl-tRNA synthetase; class II aminoacyl-tRNA synthetase that aminoacylates tRNA(Ser), displays tRNA-dependent amino acid recognition which enhances discrimination of the serine substrate, interacts with peroxin Pex21p	4314.89	-0.412455	0.200334	-2.05857	0.0395354	0.136962
YDR024W	FYV1	protein_coding	IV	Dubious open reading frame; unlikely to encode a functional protein, based on available experimental and comparative sequence data; not conserved in closely related Saccharomyces species; mutation decreases survival upon exposure to K1 killer toxin	173.962	-0.145799	0.327156	-0.444793	0.656469	0.810113
YDR025W	RPS11A	protein_coding	IV	Protein component of the small (40S) ribosomal subunit; homologous to mammalian ribosomal protein S11 and bacterial S17; N-terminally propionylated in vivo; RPS11A has a paralog, RPS11B, that arose from the whole genome duplication	3660.36	-0.614485	0.223835	-2.74427	0.00606459	0.038247
YDR026C	NSI1	protein_coding	IV	RNA polymerase I termination factor; binds to rDNA terminator element, required for efficient Pol I termination; required for rDNA silencing at NTS1; facilities association of Sir2p with NTS1, contributes to rDNA stability and cell longevity; interacts physically with Fob1p and RENT subunits, Sir2p and Net1p; may interact with ribosomes, based on co-purification experiments; Myb-like DNA-binding …	447.385	-0.25477	0.128068	-1.98916	0.0466831	0.154327
YDR027C	VPS54	protein_coding	IV	Component of the GARP (Golgi-associated retrograde protein) complex; GARP is required for the recycling of proteins from endosomes to the late Golgi, and for mitosis after DNA damage induced checkpoint arrest; potentially phosphorylated by Cdc28p; members of the GARP complex are Vps51p-Vps52p-Vps53p-Vps54p	648.37	-0.00298241	0.15039	-0.0195108	0.984434	0.993493
YDR028C	REG1	protein_coding	IV	Regulatory subunit of type 1 protein phosphatase Glc7p; involved in negative regulation of glucose-repressible genes; involved in regulation of the nucleocytoplasmic shuttling of Hxk2p; REG1 has a paralog, REG2, that arose from the whole genome duplication	2516.21	-0.0938818	0.104744	-0.896109	0.370194	0.579666
YDR030C	RAD28	protein_coding	IV	Protein involved in DNA repair; related to the human CSA protein that is involved in transcription-coupled repair nucleotide excision repair	169.003	0.741674	0.231117	3.21586	0.00130055	0.0131375
YDR031W	MIX14	protein_coding	IV	Mitochondrial intermembrane space protein of unknown function; required for normal oxygen consumption; contains twin cysteine-x9-cysteine motifs; protein abundance increases in response to DNA replication stress	162.76	0.300213	0.246841	1.21791	0.223258	0.423853
YDR032C	PST2	protein_coding	IV	Protein with similarity to a family of flavodoxin-like proteins; induced by oxidative stress in a Yap1p dependent manner; the authentic, non-tagged protein is detected in highly purified mitochondria in high-throughput studies; protein abundance increases in response to DNA replication stress; PST2 has a paralog, RFS1, that arose from the whole genome duplication	819.36	-0.0930586	0.173234	-0.537499	0.590923	0.763008
YDR033W	MRH1	protein_coding	IV	Protein that localizes primarily to the plasma membrane; also found at the nuclear envelope; long-lived protein that is asymmetrically retained in the plasma membrane of mother cells; the authentic, non-tagged protein is detected in mitochondria in a phosphorylated state; MRH1 has a paralog, YRO2, that arose from the whole genome duplication	7015.86	-0.120375	0.19983	-0.602347	0.546943	0.733083
YDR034C	LYS14	protein_coding	IV	Transcriptional activator involved in regulating lysine biosynthesis; involved in the regulation of genes of the lysine biosynthesis pathway; requires 2-aminoadipate semialdehyde as co-inducer	1511.7	0.803308	0.259012	3.10255	0.0019186	0.0172685
YDR034C-A		protein_coding	IV	Putative protein of unknown function; contained within the solo Ty1 LTR element YDRWdelta7	3.66965	-0.606446	0.737373	-0.839451	0.401216	0.609327
YDR034C-D		protein_coding	IV	Retrotransposon TYA Gag and TYB Pol genes; transcribed/translated as one unit; polyprotein is processed to make a nucleocapsid-like protein (Gag), reverse transcriptase (RT), protease (PR), and integrase (IN); similar to retroviral genes	61.2918	-0.512341	0.269378	-1.90033	0.0573903	0.177787
YDR034W-B		protein_coding	IV	Predicted tail-anchored plasma membrane protein; contains conserved CYSTM module; related proteins in other organisms may be involved in response to stress; green fluorescent protein (GFP)-fusion protein localizes to the cell periphery; YDR034W-B has a paralog, YBR056W-A, that arose from the whole genome duplication	20.0906	0.703372	0.549015	1.33969	0.180345	0.374273
YDR035W	ARO3	protein_coding	IV	3-deoxy-D-arabino-heptulosonate-7-phosphate (DAHP) synthase; catalyzes the first step in aromatic amino acid biosynthesis and is feedback-inhibited by phenylalanine or high concentration of tyrosine or tryptophan	4288.83	0.726523	0.332951	2.18199	0.0291103	0.112574
YDR036C	EHD3	protein_coding	IV	3-hydroxyisobutyryl-CoA hydrolase; member of a family of enoyl-CoA hydratase/isomerases; non-tagged protein is detected in highly purified mitochondria in high-throughput studies; phosphorylated; mutation affects fluid-phase endocytosis	306.442	-0.199953	0.157768	-1.26753	0.204966	0.40295
YDR037W	KRS1	protein_coding	IV	Lysyl-tRNA synthetase	9653.89	0.0749993	0.172695	0.434286	0.664081	0.813882
YDR038C	ENA5	protein_coding	IV	Protein with similarity to P-type ATPase sodium pumps; member of the Na+ efflux ATPase family	76.8318	0.00824693	0.185902	0.044455	0.964542	0.984909
YDR040C	ENA1	protein_coding	IV	P-type ATPase sodium pump; involved in Na+ and Li+ efflux to allow salt tolerance	54.7286	-0.0511377	0.278587	-0.182185	0.855438	0.927739
YDR041W	RSM10	protein_coding	IV	Mitochondrial ribosomal protein of the small subunit; has similarity to E. coli S10 ribosomal protein; essential for viability, unlike most other mitoribosomal proteins	257.893	-0.384664	0.154403	-2.49133	0.0127267	0.063654
YDR042C		protein_coding	IV	Putative protein of unknown function; expression is increased in ssu72-ts69 mutant	40.1101	0.988577	0.32191	3.06076	0.0022078	0.0187693
YDR043C	NRG1	protein_coding	IV	Transcriptional repressor; recruits the Cyc8p-Tup1p complex to promoters; mediates glucose repression and negatively regulates a variety of processes including filamentous growth and alkaline pH response; activated in stochastic pulses of nuclear localization in response to low glucose	765.842	0.752705	0.166011	4.53879	5.6579e-06	0.000218253
YDR044W	HEM13	protein_coding	IV	Coproporphyrinogen III oxidase; an oxygen requiring enzyme that catalyzes the sixth step in the heme biosynthetic pathway; transcription is repressed by oxygen and heme (via Rox1p and Hap1p)	312.214	-0.334965	0.203594	-1.64521	0.0999271	0.25433
YDR045C	RPC11	protein_coding	IV	RNA polymerase III subunit C11; mediates pol III RNA cleavage activity and is important for termination of transcription; homologous to TFIIS	158.144	-0.951831	0.197253	-4.82257	1.41724e-06	7.28932e-05
YDR046C	BAP3	protein_coding	IV	Amino acid permease; involved in uptake of cysteine, leucine, isoleucine and valine; BAP3 has a paralog, BAP2, that arose from the whole genome duplication	1867.25	0.149358	0.174343	0.856807	0.391552	0.600869
YDR047W	HEM12	protein_coding	IV	Uroporphyrinogen decarboxylase; catalyzes the fifth step in the heme biosynthetic pathway; localizes to both the cytoplasm and nucleus; a hem12 mutant has phenotypes similar to patients with porphyria cutanea tarda	379.364	-0.349545	0.196989	-1.77424	0.0760234	0.213183
YDR049W	VMS1	protein_coding	IV	Component of a Cdc48p-complex involved in protein quality control; exhibits cytosolic and ER-membrane localization, with Cdc48p, during normal growth, and contributes to ER-associated degradation (ERAD) of specific substrates at a step after their ubiquitination; forms a mitochondrially-associated complex with Cdc48p and Npl4p under oxidative stress that is required for ubiquitin-mediated mitocho…	421.369	-0.129956	0.114097	-1.1387	0.254829	0.45841
YDR050C	TPI1	protein_coding	IV	Triose phosphate isomerase, abundant glycolytic enzyme; mRNA half-life is regulated by iron availability; transcription is controlled by activators Reb1p, Gcr1p, and Rap1p through binding sites in the 5' non-coding region; inhibition of Tpi1p activity by PEP (phosphoenolpyruvate) stimulates redox metabolism in respiring cells; E104D mutation in human TPI causes a rare autosomal disease	12340.5	-0.528678	0.233241	-2.26564	0.0234737	0.0971695
YDR051C	DET1	protein_coding	IV	Acid phosphatase; involved in the non-vesicular transport of sterols in both directions between the endoplasmic reticulum and plasma membrane; deletion confers sensitivity to nickel	313.157	-0.206412	0.168122	-1.22781	0.219519	0.420377
YDR052C	DBF4	protein_coding	IV	Regulatory subunit of Cdc7p-Dbf4p kinase complex; required for Cdc7p kinase activity and initiation of DNA replication; phosphorylates the Mcm2-7 family of proteins; cell cycle regulated; relative distribution to the nucleus increases upon DNA replication stress	615.88	-0.127543	0.131487	-0.96991	0.332091	0.541524
YDR054C	CDC34	protein_coding	IV	Ubiquitin-conjugating enzyme (E2); catalytic subunit of SCF ubiquitin-protein ligase complex (together with Skp1p, Rbx1p, Cdc53p, and an F-box protein) that regulates cell cycle progression by targeting key substrates for degradation; protein abundance increases in response to DNA replication stress	804.595	0.140786	0.118719	1.18628	0.235511	0.43822
YDR055W	PST1	protein_coding	IV	Cell wall protein that contains a putative GPI-attachment site; secreted by regenerating protoplasts; up-regulated by activation of the cell integrity pathway, as mediated by Rlm1p; upregulated by cell wall damage via disruption of FKS1; PST1 has a paralog, ECM33, that arose from the whole genome duplication	2671.75	1.04839	0.189422	5.53568	3.1003e-08	3.18917e-06
YDR056C		protein_coding	IV	Putative protein of unknown function; green fluorescent protein (GFP)-fusion protein localizes to the endoplasmic reticulum; YDR056C is not an essential protein	393.72	-0.012518	0.136708	-0.0920122	0.926688	0.965524
YDR057W	YOS9	protein_coding	IV	ER quality-control lectin; integral subunit of the HRD ligase; participates in efficient ER retention of misfolded proteins by recognizing them and delivering them to Hrd1p; binds to glycans with terminal alpha-1,6 linked mannose on misfolded N-glycosylated proteins and participates in targeting proteins to ERAD; member of the OS-9 protein family	325.354	0.264348	0.124788	2.11883	0.0341047	0.125145
YDR058C	TGL2	protein_coding	IV	Triacylglycerol lipase that is localized to the mitochondria; has lipolytic activity towards triacylglycerols and diacylglycerols when expressed in E. coli	203.002	0.269462	0.178394	1.51352	0.130149	0.304734
YDR059C	UBC5	protein_coding	IV	Ubiquitin-conjugating enzyme; mediates selective degradation of short-lived, abnormal, or excess proteins, including histone H3; central component of the cellular stress response; expression is heat inducible; protein abundance increases in response to DNA replication stress; UBC5 has a paralog, UBC4, that arose from the whole genome duplication	129.363	0.206529	0.244403	0.847297	0.39683	0.605048
YDR060W	MAK21	protein_coding	IV	Constituent of 66S pre-ribosomal particles; required for large (60S) ribosomal subunit biogenesis; acts as part of a Mak21p-Noc2p-Rrp5p module that associates with nascent pre-rRNA during transcription and has a role in bigenesis of the large ribosomal subunit; involved in nuclear export of pre-ribosomes; required for maintenance of dsRNA virus; homolog of human CAATT-binding protein	2753.73	-0.258253	0.211789	-1.21928	0.222739	0.423259
YDR061W		protein_coding	IV	Protein with similarity to ABC transporter family members; lacks predicted membrane-spanning regions; transcriptionally activated by Yrm1p along with genes involved in multidrug resistance	599.223	-0.134406	0.150036	-0.895835	0.370341	0.579696
YDR062W	LCB2	protein_coding	IV	Component of serine palmitoyltransferase; responsible along with Lcb1p for the first committed step in sphingolipid synthesis, which is the condensation of serine with palmitoyl-CoA to form 3-ketosphinganine	1664.83	-0.15735	0.1388	-1.13367	0.256932	0.459945
YDR063W	AIM7	protein_coding	IV	Protein that interacts with Arp2/3 complex; interacts with Arp2/3 complex to stimulate actin filament debranching and inhibit actin nucleation; has similarity to Cof1p and also to human glia maturation factor (GMF); null mutant displays elevated mitochondrial genome loss	153.208	-0.448391	0.16036	-2.79625	0.00516988	0.0343102
YDR064W	RPS13	protein_coding	IV	Protein component of the small (40S) ribosomal subunit; homologous to mammalian ribosomal protein S13 and bacterial S15	5813.06	-0.706688	0.186236	-3.79388	0.000148312	0.00266875
YDR065W	RRG1	protein_coding	IV	Protein of unknown function; required for vacuolar acidification and mitochondrial genome maintenance; the authentic, non-tagged protein is detected in highly purified mitochondria in high-throughput studies	197.549	0.119189	0.190956	0.62414	0.532536	0.722376
YDR066C	RTR2	protein_coding	IV	Protein of unknown function; exhibits genetic interactions with Rtr1p; green fluorescent protein (GFP)-fusion protein localizes to the cytoplasm; YDR066C is not an essential gene; relocalizes from nucleus to cytoplasmic foci upon DNA replication stress; RTR2 has a paralog, RTR1, that arose from the whole genome duplication	54.473	0.132824	0.235174	0.560928	0.574847	0.751685
YDR067C	OCA6	protein_coding	IV	Cytoplasmic protein required for replication of Brome mosaic virus; S. cerevisiae is a model system for studying positive-strand RNA virus replication; null mutation confers sensitivity to tunicamycin and DTT	336.413	-0.0379289	0.164544	-0.228688	0.819112	0.910993
YDR068W	DOS2	protein_coding	IV	Protein of unknown function; green fluorescent protein (GFP)-fusion protein localizes to the cytoplasm	216.331	-0.00807463	0.177705	-0.0450081	0.964101	0.984909
YDR069C	DOA4	protein_coding	IV	Ubiquitin hydrolase; deubiquitinates intralumenal vesicle (ILVs) cargo proteins; required for recycling ubiquitin from proteasome-bound ubiquitinated intermediates, acts at the late endosome/prevacuolar compartment to recover ubiquitin from ubiquitinated membrane proteins destined for the vacuole; DOA4 has a paralog, UBP5, that arose from the whole genome duplication	380.927	0.261594	0.132664	1.97259	0.0485418	0.15792
YDR070C	FMP16	protein_coding	IV	Protein of unknown function; may be involved in responding to conditions of stress; the authentic, non-tagged protein is detected in highly purified mitochondria in high-throughput studies; protein abundance increases in response to DNA replication stress	161.462	1.04329	0.380476	2.74595	0.00603368	0.0381166
YDR071C	PAA1	protein_coding	IV	Polyamine acetyltransferase; acetylates polyamines (e.g. putrescine, spermidine, spermine) and also aralkylamines (e.g. tryptamine, phenylethylamine); may be involved in transcription and/or DNA replication	901.625	-0.209899	0.154554	-1.35817	0.17441	0.366964
YDR072C	IPT1	protein_coding	IV	Inositolphosphotransferase; involved in synthesis of mannose-(inositol-P)2-ceramide (M(IP)2C), the most abundant sphingolipid; can mutate to resistance to the antifungals syringomycin E and DmAMP1 and to K. lactis zymocin	1347.55	-0.213033	0.169809	-1.25457	0.209634	0.408446
YDR073W	SNF11	protein_coding	IV	Subunit of the SWI/SNF chromatin remodeling complex; involved in transcriptional regulation; interacts with a highly conserved 40-residue sequence of Snf2p; relocates to the cytosol under hypoxic conditions	275.257	0.122082	0.166467	0.733289	0.463382	0.666821
YDR074W	TPS2	protein_coding	IV	Phosphatase subunit of the trehalose-6-P synthase/phosphatase complex; involved in synthesis of the storage carbohydrate trehalose; expression is induced by stress conditions and repressed by the Ras-cAMP pathway; protein abundance increases in response to DNA replication stress	2867.97	-0.244948	0.267182	-0.917066	0.359108	0.568511
YDR075W	PPH3	protein_coding	IV	Catalytic subunit of protein phosphatase PP4 complex; Pph3p and Psy2p form active complex, Psy4p may provide substrate specificity; regulates recovery from the DNA damage checkpoint, the gene conversion- and single-strand annealing-mediated pathways of meiotic double-strand break repair and efficient Non-Homologous End-Joining (NHEJ) pathway; involved in activation of Gln3p to alleviate nitrogen …	316.353	0.268823	0.155345	1.72984	0.0836588	0.225
YDR076W	RAD55	protein_coding	IV	Protein that stimulates strand exchange; stimulates strand exchange by stabilizing the binding of Rad51p to single-stranded DNA; involved in the recombinational repair of double-strand breaks in DNA during vegetative growth and meiosis; forms heterodimer with Rad57p	169.345	0.676628	0.324389	2.08705	0.0368835	0.130455
YDR077W	SED1	protein_coding	IV	Major stress-induced structural GPI-cell wall glycoprotein; associates with translating ribosomes, possible role in mitochondrial genome maintenance; ORF contains two distinct variable minisatellites; SED1 has a paralog, SPI1, that arose from the whole genome duplication	9164.63	0.794456	0.163765	4.85165	1.22437e-06	6.57113e-05
YDR078C	SHU2	protein_coding	IV	Component of Shu complex (aka PCSS complex); Shu complex also includes Psy3, Csm2, Shu1, and promotes error-free DNA repair, Shu complex mediates inhibition of Srs2p function; promotes formation of Rad51p filaments	45.3126	-0.547391	0.281182	-1.94643	0.0516027	0.164851
YDR079C-A	TFB5	protein_coding	IV	Component of RNA polymerase II general transcription factor TFIIH; involved in transcription initiation and in nucleotide-excision repair; relocalizes to the cytosol in response to hypoxia; homolog of Chlamydomonas reinhardtii REX1-S protein involved in DNA repair	27.0886	0.138443	0.308457	0.440408	0.659642	0.812124
YDR079W	PET100	protein_coding	IV	Chaperone that facilitates the assembly of cytochrome c oxidase; integral to the mitochondrial inner membrane; interacts with a subcomplex of subunits VII, VIIa, and VIII (Cox7p, Cox9p, and Cox8p) but not with the holoenzyme	109.565	0.0683724	0.220933	0.309317	0.75708	0.877207
YDR080W	VPS41	protein_coding	IV	Subunit of the HOPS endocytic tethering complex; vacuole membrane protein that functions as a Rab GTPase effector, interacting specifically with the GTP-bound conformation of Ypt7p, facilitating tethering, docking and promoting membrane fusion events at the late endosome and vacuole; required for both membrane and protein trafficking; Yck3p-mediated phosphorylation regulates the organization of v…	548.428	0.407137	0.147431	2.76181	0.00574818	0.0369375
YDR081C	PDC2	protein_coding	IV	Transcription factor for thiamine-regulated genes; required for expression of the two isoforms of pyruvate decarboxylase (PDC1 and PDC5) along with thiamine biosynthetic genes; binds a DNA sequence in the PDC5 promoter; mutant fails to grow on 2% glucose and thus is scored as inviable under standard conditions	765.011	0.141594	0.115926	1.22192	0.22174	0.422531
YDR082W	STN1	protein_coding	IV	Telomere end-binding and capping protein; plays a key role with Pol12p in linking telomerase action with completion of lagging strand synthesis, and in a regulatory step required for telomere capping; similar to human Stn1	268.917	0.347769	0.189048	1.84084	0.0656452	0.194229
YDR083W	RRP8	protein_coding	IV	Nucleolar S-adenosylmethionine-dependent rRNA methyltransferase; methylates adenine (m1A) of the large subunit (LSU) rRNA at position 645; involved in pre-rRNA cleavage at site A2; mutation is synthetically lethal with a gar1 mutation; deletion disrupts telomere maintenance by influencing the expression of neighboring gene STN1	424.488	-0.324669	0.191649	-1.69437	0.0901941	0.236884
YDR084C	TVP23	protein_coding	IV	Integral membrane protein; localized to late Golgi vesicles along with the v-SNARE Tlg2p; green fluorescent protein (GFP)-fusion protein localizes to the cytoplasm in a punctate pattern	199.656	-0.210232	0.165916	-1.26743	0.205	0.40295
YDR085C	AFR1	protein_coding	IV	Protein required for pheromone-induced projection (shmoo) formation; regulates septin architecture during mating; has an RVXF motif that mediates targeting of Glc7p to mating projections; interacts with Cdc12p; AFR1 has a paralog, YER158C, that arose from the whole genome duplication	433.831	0.0286642	0.225902	0.129075	0.897299	0.950425
YDR086C	SSS1	protein_coding	IV	Subunit of the Sec61p translocation complex (Sec61p-Sss1p-Sbh1p); this complex forms a channel for passage of secretory proteins through the endoplasmic reticulum membrane, and of the Ssh1p complex (Ssh1p-Sbh2p-Sss1p); interacts with Ost4p and Wbp1p	855.101	0.0577365	0.154117	0.374464	0.708059	0.84268
YDR087C	RRP1	protein_coding	IV	Essential evolutionarily conserved nucleolar protein; necessary for biogenesis of 60S ribosomal subunits and for processing of pre-rRNAs to mature rRNA; associated with several distinct 66S pre-ribosomal particles	503.187	-0.128671	0.256852	-0.500826	0.616493	0.780513
YDR088C	SLU7	protein_coding	IV	RNA splicing factor; required for ATP-independent portion of 2nd catalytic step of spliceosomal RNA splicing; interacts with Prp18p; contains zinc knuckle domain	294.723	0.0939818	0.172468	0.546696	0.584587	0.758477
YDR089W		protein_coding	IV	Protein of unknown function; deletion confers resistance to nickel; contains an SPX domain, which is found in proteins involved in phosphate homeostasis; relocalizes from vacuole to cytoplasm upon DNA replication stress	588.339	-0.599551	0.230476	-2.60126	0.00928829	0.0515998
YDR090C		protein_coding	IV	Putative protein of unknown function	262.579	0.472229	0.232369	2.03155	0.0421988	0.143578
YDR091C	RLI1	protein_coding	IV	Essential Fe-S protein; required for ribosome biogenesis, translation initiation/termination; facilitates binding of multifactor complex (MFC) of initiation factors to small ribosomal subunit; Dom34-Hbs1 complex and Rli1p work in dissociating inactive ribosomes, thereby facilitating translation restart; forms complex with Lto1p and Yae1p; dependency on ROS-labile FeS clusters, activity in nuclear…	2119.75	-0.481408	0.201931	-2.38384	0.0171331	0.0784462
YDR092W	UBC13	protein_coding	IV	E2 ubiquitin-conjugating enzyme; involved in the error-free DNA postreplication repair pathway; interacts with Mms2p to assemble ubiquitin chains at the Ub Lys-63 residue; DNA damage triggers redistribution from the cytoplasm to the nucleus	387.202	0.151315	0.115293	1.31136	0.189736	0.384882
YDR093W	DNF2	protein_coding	IV	Aminophospholipid translocase (flippase); localizes primarily to the plasma membrane; contributes to endocytosis, protein transport and cell polarity; type 4 P-type ATPase; DNF2 has a paralog, DNF1, that arose from the whole genome duplication	1466.56	-0.0453838	0.132518	-0.342517	0.731962	0.860344
YDR094W		protein_coding	IV	Dubious open reading frame; unlikely to encode a functional protein, based on available experimental and comparative sequence data; partially overlaps verified ORF DNF2/YDR093W	16.5053	-0.414112	0.382652	-1.08243	0.279061	0.484451
YDR095C		protein_coding	IV	Dubious open reading frame; unlikely to encode a functional protein, based on available experimental and comparative sequence data	3.21598	-1.06688	0.731029	-1.49966	0.133702	0.310112
YDR096W	GIS1	protein_coding	IV	Histone demethylase and transcription factor; regulates genes during nutrient limitation; activity modulated by proteasome-mediated proteolysis; has JmjC and JmjN domain in N-terminus that interact, promoting stability and proper transcriptional activity; contains two transactivating domains downstream of Jmj domains and a C-terminal DNA binding domain; relocalizes to the cytosol in response to h…	565.972	-0.156072	0.16413	-0.95059	0.341813	0.551704
YDR097C	MSH6	protein_coding	IV	Protein required for mismatch repair in mitosis and meiosis; forms a complex with Msh2p to repair both single-base & insertion-deletion mispairs; also involved in interstrand cross-link repair; potentially phosphorylated by Cdc28p	933.617	-0.161523	0.160806	-1.0044	0.315187	0.521817
YDR098C	GRX3	protein_coding	IV	Glutathione-dependent oxidoreductase; hydroperoxide and superoxide-radical responsive; monothiol glutaredoxin subfamily member along with Grx4p and Grx5p; protects cells from oxidative damage; with Grx4p, binds to Aft1p in iron-replete conditions, promoting its dissociation from promoters; evidence exists indicating that the translation start site is not Met1 as currently annotated, but rather Me…	711.059	0.191182	0.143253	1.33456	0.182022	0.376235
YDR098C-B		protein_coding	IV	Retrotransposon TYA Gag and TYB Pol genes; transcribed/translated as one unit; polyprotein is processed to make a nucleocapsid-like protein (Gag), reverse transcriptase (RT), protease (PR), and integrase (IN); similar to retroviral genes	31.2419	2.86352	0.692746	3.96969	7.19674e-05	0.00156402
YDR099W	BMH2	protein_coding	IV	14-3-3 protein, minor isoform; controls proteome at post-transcriptional level, binds proteins and DNA, involved in regulation of many processes including exocytosis, vesicle transport, Ras/MAPK signaling, and rapamycin-sensitive signaling; protein increases in abundance and relative distribution to the nucleus increases upon DNA replication stress; BMH2 has a paralog, BMH1, that arose from the w…	3416.78	0.0115448	0.118176	0.0976678	0.922196	0.964073
YDR100W	TVP15	protein_coding	IV	Integral membrane protein; localized to late Golgi vesicles along with the v-SNARE Tlg2p	257.739	0.183931	0.15931	1.1537	0.248621	0.452401
YDR101C	ARX1	protein_coding	IV	Nuclear export factor for the ribosomal pre-60S subunit; shuttling factor which directly binds FG rich nucleoporins and facilities translocation through the nuclear pore complex; interacts directly with Alb1p; responsible for Tif6p recycling defects in the absence of Rei1; associated with the ribosomal export complex	1765.61	-0.0151523	0.224741	-0.067435	0.946235	0.976453
YDR102C		protein_coding	IV	Dubious open reading frame; unlikely to encode a functional protein, based on available experimental and comparative sequence data; homozygous diploid deletion strain exhibits high budding index	7.27926	-0.0299782	0.559406	-0.0529643	0.95776	0.983049
YDR103W	STE5	protein_coding	IV	Pheromone-responsive MAPK scaffold protein; couples activation of the G-protein-coupled pheromone receptor to MAPK activation; intramolecular interaction of PH and VWA domains blocks activation of assembled signaling cascade components (Ste11p, Ste7p and Fus3p) under basal conditions; Gbeta-gamma (Ste4p-Ste18p)-dependent docking at the plasma membrane and binding of PI(4,5)P2 by the PH domain rel…	705.564	-0.168471	0.127081	-1.3254	0.185038	0.380281
YDR104C	SPO71	protein_coding	IV	Meiosis-specific protein required for spore wall formation; localizes to prospore membrane (PSM) and is required for PSM closure during sporulation; mediates PSM size; interacts with Spo1p and Vps13p and recruits Vps13p to the PSM during sporulation; mutants exhibit reduction in PSM PtdIns-phosphate pools; dispensable for both nuclear divisions during meiosis; contains two PH domains	443.541	0.0494695	0.185135	0.268018	0.788686	0.894197
YDR105C	TMS1	protein_coding	IV	Vacuolar membrane protein of unknown function; is conserved in mammals; predicted to contain eleven transmembrane helices; interacts with Pdr5p, a protein involved in multidrug resistance	379.832	-0.192862	0.13293	-1.45095	0.146794	0.328416
YDR106W	ARP10	protein_coding	IV	Component of the dynactin complex; localized to the pointed end of the Arp1p filament; may regulate membrane association of the complex	22.6595	0.0372118	0.364163	0.102736	0.918173	0.962787
YDR107C	TMN2	protein_coding	IV	Protein with a role in cellular adhesion and filamentous growth; similar to Tmn3p; member of the evolutionarily conserved Transmembrane Nine family of proteins with nine membrane-spanning segments; TMN2 has a paralog, EMP70, that arose from the whole genome duplication	396.13	0.484343	0.136755	3.54076	0.000398972	0.00568696
YDR108W	TRS85	protein_coding	IV	Component of transport protein particle (TRAPP) complex III; TRAPPIII is a multimeric guanine nucleotide-exchange factor for the GTPase Ypt1p, regulating endosome-Golgi traffic and required for membrane expansion during autophagy and the CVT pathway; directs Ypt1p to the PAS; late post-replication meiotic role	347.404	0.36651	0.156232	2.34597	0.0189776	0.0843266
YDR109C		protein_coding	IV	Putative kinase	284.741	0.436042	0.15149	2.87831	0.00399808	0.028396
YDR110W	FOB1	protein_coding	IV	Nucleolar protein that binds the rDNA replication fork barrier site; required for replication fork blocking, recombinational hotspot activity, condensin recruitment to replication fork barrier (RFB), and rDNA repeat segregation; related to retroviral integrases	388.744	0.0955171	0.160971	0.594211	0.552371	0.737132
YDR111C	ALT2	protein_coding	IV	Catalytically inactive alanine transaminase; expression is repressed in the presence of alanine and repression is mediated by Nrg1p; ALT2 has a paralog, ALT1, that arose from the whole genome duplication	293.146	-1.56164	0.265772	-5.87176	4.3119e-09	5.91401e-07
YDR113C	PDS1	protein_coding	IV	Securin; inhibits anaphase by binding separin Esp1p; blocks cyclin destruction and mitotic exit, essential for meiotic progression and mitotic cell cycle arrest; localization is cell-cycle dependent and regulated by Cdc28p phosphorylation	187.234	-0.026896	0.164885	-0.164038	0.869701	0.934993
YDR114C		protein_coding	IV	Putative protein of unknown function; deletion mutant exhibits poor growth at elevated pH and calcium	2.31485	-0.20919	0.733516	-0.283727	0.77662
YDR115W		protein_coding	IV	Putative mitochondrial ribosomal protein of the large subunit; similar to E. coli L34 ribosomal protein; required for respiratory growth, as are most mitochondrial ribosomal proteins; protein increases in abundance and relocalizes to the plasma membrane upon DNA replication stress	142.189	-0.860889	0.197457	-4.35732	1.31668e-05	0.000414619
YDR116C	MRPL1	protein_coding	IV	Mitochondrial ribosomal protein of the large subunit	259.681	-0.482654	0.158323	-3.04834	0.00230107	0.0192703
YDR117C	TMA64	protein_coding	IV	Protein of unknown function that associates with ribosomes; has a putative RNA binding domain; in mammals the corresponding protein, eIF2D, has been shown to possess translation initiation factor activity	469.63	-0.304616	0.111843	-2.72368	0.00645582	0.0398055
YDR118W	APC4	protein_coding	IV	Subunit of the Anaphase-Promoting Complex/Cyclosome (APC/C); APC/C is a ubiquitin-protein ligase required for degradation of anaphase inhibitors, including mitotic cyclins, during the metaphase/anaphase transition; component of the platform domain of the APC/C, based on structural analysis; relative distribution to the nucleus increases upon DNA replication stress	237.572	-0.227981	0.17128	-1.33075	0.183271	0.377621
YDR118W-A		protein_coding	IV	Dubious open reading frame; unlikely to encode a functional protein, based on available experimental and comparative sequence data; identified using a combination of expression profiling and mass spectrometry	14.7505	-0.0783212	0.44177	-0.17647	0.859925	0.929502
YDR119W	VBA4	protein_coding	IV	Protein of unknown function; proposed role as a basic amino acid permease based on phylogeny; GFP-fusion protein localizes to vacuolar membrane; physical interaction with Atg27p suggests a possible role in autophagy; non-essential gene	1251.29	-0.145466	0.118109	-1.23166	0.218075	0.418351
YDR119W-A	COX26	protein_coding	IV	Putative protein of unknown function; copurifies with respiratory chain supercomplexes composed of Complex III (ubiquinol-cytochrome c reductase) and Complex IV (cytochrome c oxidase)	48.9549	2.23777	0.454859	4.82886	1.37318e-06	7.18245e-05
YDR120C	TRM1	protein_coding	IV	tRNA methyltransferase; two forms of protein are made by alternative translation starts; localizes to both nucleus and mitochondrion to produce modified base N2,N2-dimethylguanosine in tRNAs in both compartments; nuclear Trm1p is evenly distributed around inner membrane in WT, but mislocalizes as puncta near ER-nucleus junctions in spindle pole body (SPB) mutants; both Trm1p inner nuclear membran…	859.331	-0.015406	0.18063	-0.0852925	0.932029	0.96722
YDR121W	DPB4	protein_coding	IV	Subunit of DNA pol epsilon and of ISW2 chromatin accessibility complex; involved in both chromosomal DNA replication and inheritance of telomeric silencing; stabilizes the interaction of Pol epsilon with primer-template DNA, positively affecting the processivity of the polymerase and exonuclease activities of Pol epsilon; interacts with extranucleosomal DNA and acts as anchor point for ISW2 compl…	200.463	-0.314798	0.159411	-1.9751	0.048257	0.157505
YDR122W	KIN1	protein_coding	IV	Serine/threonine protein kinase involved in regulation of exocytosis; localizes to the cytoplasmic face of the plasma membrane; KIN1 has a paralog, KIN2, that arose from the whole genome duplication	1428.61	-0.158514	0.131335	-1.20671	0.227543	0.429479
YDR123C	INO2	protein_coding	IV	Transcription factor; component of the heteromeric Ino2p/Ino4p basic helix-loop-helix transcription activator that binds inositol/choline-responsive elements (ICREs), required for derepression of phospholipid biosynthetic genes in response to inositol depletion; involved in diauxic shift	327.113	0.259871	0.335717	0.773263	0.439367	0.644198
YDR124W		protein_coding	IV	Putative protein of unknown function; non-essential gene; expression is strongly induced by alpha factor	94.846	0.1807	0.377569	0.476684	0.633587	0.792883
YDR125C	ECM18	protein_coding	IV	Protein of unknown function; ECM18 has a paralog, ICT1, that arose from the whole genome duplication	161.257	0.499236	0.214574	2.32814	0.0199048	0.0871912
YDR126W	SWF1	protein_coding	IV	Palmitoyltransferase that acts on transmembrane proteins; including the SNAREs Snc1p, Syn8p, Tlg1p and likely all SNAREs; contains an Asp-His-His-Cys-cysteine rich (DHHC-CRD) domain; may have a role in vacuole fusion	102.946	-0.102721	0.189361	-0.541009	0.588501	0.760988
YDR127W	ARO1	protein_coding	IV	Pentafunctional arom protein; catalyzes steps 2 through 6 in the biosynthesis of chorismate, which is a precursor to aromatic amino acids	9472.88	0.205326	0.163674	1.25445	0.20968	0.408446
YDR128W	MTC5	protein_coding	IV	Subunit of the SEA (Seh1-associated) complex; SEA is a coatomer-related complex that associates dynamically with the vacuole; has N-terminal WD-40 repeats and a C-terminal RING motif; mtc5 is synthetically sick with cdc13-1; relative distribution to vacuolar membrane punctae decreases upon DNA replication stress	786.07	0.188882	0.113427	1.66508	0.095896	0.247231
YDR129C	SAC6	protein_coding	IV	Fimbrin, actin-bundling protein; cooperates with Scp1p (calponin/transgelin) in the organization and maintenance of the actin cytoskeleton; relocalizes from plasma membrane to cytoplasm upon DNA replication stress	3839.22	-0.0280009	0.184908	-0.151428	0.879638	0.940271
YDR130C	FIN1	protein_coding	IV	Spindle pole body-related intermediate filament protein; forms cell cycle-specific filaments between spindle pole bodies in dividing cells; localizes to poles and microtubules of spindle during anaphase and contributes to spindle stability; involved in Glc7p localization and regulation; relative distribution to the nucleus increases upon DNA replication stress	173.073	-0.0607529	0.146343	-0.415246	0.677962	0.822951
YDR131C		protein_coding	IV	F-box protein subunit of SCF ubiquitin ligase complex; substrate-specific adaptor subunit that recruits substrates to a core ubiquitination complex	205.855	0.0590714	0.172057	0.344728	0.730299	0.858717
YDR132C		protein_coding	IV	Protein of unknown function; protein increases in abundance and relative distribution to the nucleus increases upon DNA replication stress; YDR132C has a paralog, YLR108C, that arose from the whole genome duplication	118.152	-0.501088	0.175492	-2.85457	0.00430953	0.0300901
YDR133C		protein_coding	IV	Dubious open reading frame; unlikely to encode a functional protein, based on available experimental and comparative sequence data; partially overlaps YDR134C	155.486	-0.1725	0.245227	-0.704354	0.481212	0.681046
YDR134C		pseudogene	IV	Hypothetical protein; YDR134C has a paralog, CCW12, that arose from the whole genome duplication	231.928	0.0972289	0.233428	0.416299	0.677191	0.82276
YDR135C	YCF1	protein_coding	IV	Vacuolar glutathione S-conjugate transporter; ABC-C transporter of the ATP-binding cassette family; required for vacuole fusion; forms stable complexes with vacuole fusion machinery; regulates Vam7p recruitment to vacuoles; role in detoxifying metals (Cd, Hg, As); transports GSSG that is not immediately reduced in cytosol to vacuole; transports unconjugated bilirubin, selenodigluthatione, oxidize…	3658.54	0.0985153	0.113157	0.870593	0.383976	0.594497
YDR136C	VPS61	protein_coding	IV	Dubious open reading frame; unlikely to encode a functional protein, based on available experimental and comparative sequence data; not conserved in closely related Saccharomyces species; 4% of ORF overlaps the verified gene RGP1; deletion causes a vacuolar protein sorting defect	6.87782	-1.14393	0.610889	-1.86808	0.0617515	0.185917
YDR137W	RGP1	protein_coding	IV	Subunit of a Golgi membrane exchange factor (Ric1p-Rgp1p); this complex catalyzes nucleotide exchange on Ypt6p	487.582	-0.163501	0.132409	-1.23438	0.21706	0.41709
YDR138W	HPR1	protein_coding	IV	Subunit of THO/TREX complexes; this complex couple transcription elongation with mitotic recombination and with mRNA metabolism and export, subunit of an RNA Pol II complex; regulates lifespan; involved in telomere maintenance; similar to Top1p	766.864	0.303182	0.156785	1.93447	0.0530559	0.167929
YDR139C	RUB1	protein_coding	IV	Ubiquitin-like protein with similarity to mammalian NEDD8; conjugation (neddylation) substrates include the cullins Cdc53p, Rtt101p, and Cul3p; activated by Ula1p and Uba3p (E1 enzyme pair); conjugation mediated by Ubc12p (E2 enzyme)	180.559	-0.0891126	0.170868	-0.52159	0.601956	0.771004
YDR140W	MTQ2	protein_coding	IV	S-adenosylmethionine-dependent methyltransferase; subunit of complex with Trm112p that methylates translation release factor Sup45p (eRF1) in the ternary complex eRF1-eRF3-GTP; similar to E.coli PrmC; member of the seven beta-strand family	171.409	0.0913718	0.152349	0.598484	0.549517	0.734753
YDR141C	DOP1	protein_coding	IV	Golgi-localized, leucine-zipper domain containing protein; involved in endosome to Golgi transport, organization of the ER, establishing cell polarity, and morphogenesis; detected in highly purified mitochondria in high-throughput studies	1858.86	0.196185	0.0904845	2.16848	0.0301225	0.114905
YDR142C	PEX7	protein_coding	IV	Peroxisomal signal receptor for peroxisomal matrix proteins; recognizes the N-terminal nonapeptide signal (PTS2); WD repeat protein; defects in human homolog cause lethal rhizomelic chondrodysplasia punctata (RCDP)	235.576	-0.107081	0.152283	-0.703314	0.48186	0.681651
YDR143C	SAN1	protein_coding	IV	Ubiquitin-protein ligase; involved in proteasome-dependent degradation of aberrant nuclear proteins; targets substrates with regions of exposed hydrophobicity containing 5 or more contiguous hydrophobic residues; contains intrinsically disordered regions that contribute to substrate recognition; prefers a window of exposed hydrophobicity that causes a particular level of protein insolubility, sug…	476.203	-0.169112	0.141907	-1.19177	0.233353	0.435649
YDR144C	MKC7	protein_coding	IV	GPI-anchored aspartyl protease; member of the yapsin family of proteases involved in cell wall growth and maintenance; shares functions with Yap3p and Kex2p; MKC7 has a paralog, YPS1, that arose from the whole genome duplication	472.237	-0.103049	0.217389	-0.473786	0.635653	0.794177
YDR145W	TAF12	protein_coding	IV	Subunit (61/68 kDa) of TFIID and SAGA complexes; involved in RNA polymerase II transcription initiation and in chromatin modification, similar to histone H2A	809.232	0.324701	0.130874	2.48136	0.0130882	0.0649786
YDR146C	SWI5	protein_coding	IV	Transcription factor that recruits Mediator and Swi/Snf complexes; activates transcription of genes expressed at the M/G1 phase boundary and in G1 phase; required for expression of the HO gene controlling mating type switching; localization to nucleus occurs during G1 and appears to be regulated by phosphorylation by Cdc28p kinase; SWI5 has a paralog, ACE2, that arose from the whole genome duplic…	717.898	0.00614218	0.20653	0.0298549	0.976183	0.990302
YDR147W	EKI1	protein_coding	IV	Ethanolamine kinase; primarily responsible for phosphatidylethanolamine synthesis via the CDP-ethanolamine pathway; exhibits some choline kinase activity, thus contributing to phosphatidylcholine synthesis via the CDP-choline pathway; EKI1 has a paralog, CKI1, that arose from the whole genome duplication	441.645	0.0816165	0.191925	0.424793	0.670987	0.818122
YDR148C	KGD2	protein_coding	IV	Dihydrolipoyl transsuccinylase; component of the mitochondrial alpha-ketoglutarate dehydrogenase complex, which catalyzes the oxidative decarboxylation of alpha-ketoglutarate to succinyl-CoA in the TCA cycle; phosphorylated	1031.88	-0.468876	0.189008	-2.48068	0.0131133	0.0649786
YDR149C		protein_coding	IV	Dubious open reading frame; unlikely to encode a functional protein, based on available experimental and comparative sequence data; overlaps the verified gene NUM1/YDR150W; null mutation blocks anaerobic growth	2.34655	0.809753	0.743923	1.319	0.187169
YDR150W	NUM1	protein_coding	IV	Protein required for nuclear migration; component of the mitochondria-ER-cortex-ancor (MECA); required for the association of mitochondria with the cell cortex and for accurate distribution of mitochondrial network; interacts with Mdm36p to link the ER and motochondria at the cortex; localizes to the mother cell cortex and the bud tip; may mediate interactions of dynein and cytoplasmic microtubul…	2751.37	0.199686	0.109812	1.81853	0.0689839	0.200362
YDR151C	CTH1	protein_coding	IV	Member of the CCCH zinc finger family; similar to mammalian Tis11 protein, which activates transcription and also has a role in mRNA degradation; may function with Tis11p in iron homeostasis; CTH1 has a paralog, TIS11, that arose from the whole genome duplication	282.647	-0.0468576	0.156077	-0.299597	0.764485	0.880799
YDR152W	GIR2	protein_coding	IV	Highly-acidic RWD domain-containing protein of unknown function; cytoplasmic; forms a complex with Rbg2p; interacts with Rbg1p and Gcn1p; associates with translating ribosomes; putative intrinsically unstructured protein	505.236	-0.308364	0.161124	-1.91388	0.0556351	0.173512
YDR153C	ENT5	protein_coding	IV	Protein containing an N-terminal epsin-like domain; involved in clathrin recruitment and traffic between the Golgi and endosomes; associates with the clathrin adaptor Gga2p, clathrin adaptor complex AP-1, and clathrin	772.308	0.150694	0.128597	1.17215	0.241137	0.443077
YDR154C		protein_coding	IV	Dubious open reading frame; unlikely to encode a functional protein, based on available experimental and comparative sequence data; null mutant exhibits synthetic phenotype with alpha-synuclein	2781	0.00579431	0.160177	0.0359873	0.971292	0.988102
YDR155C	CPR1	protein_coding	IV	Cytoplasmic peptidyl-prolyl cis-trans isomerase (cyclophilin); catalyzes the cis-trans isomerization of peptide bonds N-terminal to proline residues; binds the drug cyclosporin A; N-terminally propionylated in vivo; protein abundance increases in response to DNA replication stress	3768.72	0.106406	0.153637	0.692444	0.488659	0.686934
YDR156W	RPA14	protein_coding	IV	RNA polymerase I subunit A14	201.711	-0.197296	0.17741	-1.11253	0.265912	0.470262
YDR157W		protein_coding	IV	Dubious open reading frame; unlikely to encode a functional protein, based on available experimental and comparative sequence data	98.7375	-0.366522	0.186221	-1.9698	0.0488616	0.158509
YDR158W	HOM2	protein_coding	IV	Aspartic beta semi-aldehyde dehydrogenase; catalyzes the second step in the common pathway for methionine and threonine biosynthesis; expression regulated by Gcn4p and the general control of amino acid synthesis	2332.08	0.406712	0.325792	1.24885	0.211721	0.411184
YDR159W	SAC3	protein_coding	IV	mRNA export factor; required for biogenesis of the small ribosomal subunit; component of TREX-2 complex (Sac3p-Thp1p-Sus1p-Cdc31p) involved in transcription elongation and mRNA export from the nucleus; involved in post-transcriptional tethering of active genes to the nuclear periphery and to non-nascent mRNP; similar to the human germinal center-associated nuclear protein (GANP)	1008.42	0.0799845	0.12477	0.641531	0.521178	0.713239
YDR160W	SSY1	protein_coding	IV	Component of the SPS plasma membrane amino acid sensor system; senses external amino acid concentration and transmits intracellular signals that result in regulation of expression of amino acid permease genes; other members are Ssy1p, Ptr3p, and Ssy5p	342.211	-0.0135553	0.136351	-0.0989043	0.921214	0.963847
YDR161W		protein_coding	IV	Putative protein of unknown function; non-essential gene; proposed function in rRNA and ribosome biosynthesis based on transcriptional co-regulation; genetic interactions suggest a role in ER-associated protein degradation (ERAD)	552.286	-0.151091	0.219511	-0.688291	0.49127	0.68852
YDR162C	NBP2	protein_coding	IV	Protein involved in the HOG (high osmolarity glycerol) pathway; negatively regulates Hog1p by recruitment of phosphatase Ptc1p the Pbs2p-Hog1p complex; interacts with Bck1p and down regulates the cell wall integrity pathway; found in the nucleus and cytoplasm, contains an SH3 domain and a Ptc1p binding domain (PBM)	142.548	0.295019	0.208284	1.41668	0.156576	0.342934
YDR163W	CWC15	protein_coding	IV	Non-essential protein involved in pre-mRNA splicing; component of a complex containing Cef1p; has similarity to S. pombe Cwf15p	80.8115	0.286778	0.300298	0.959517	0.337299	0.546693
YDR164C	SEC1	protein_coding	IV	Sm-like protein involved in docking and fusion of exocytic vesicles; binds to assembled SNARE complexes at the membrane and stimulates membrane fusion; localization to sites of secretion (bud neck and bud tip) is dependent on SNARE function; interacts directly with essential exocyst subunit Sec6p	523.677	0.228038	0.128363	1.77633	0.075678	0.212698
YDR165W	TRM82	protein_coding	IV	Catalytic subunit of a tRNA methyltransferase complex; Trm8p and Trm82p comprise an enzyme that catalyzes a methyl-transfer from S-adenosyl-l-methionine to the N(7) atom of guanine at position 46 in tRNA; Trm8 lacks catalytic activity if not bound to Trm82p; relocalizes to the cytosol in response to hypoxia	792.131	-0.364789	0.163961	-2.22483	0.0260925	0.104709
YDR166C	SEC5	protein_coding	IV	Essential 107kDa subunit of the exocyst complex; the exocyst mediates polarized targeting and tethering of post-Golgi secretory vesicles to active sites of exocytosis at the plasma membrane prior to SNARE-mediated fusion; involved in assembly of the exocyst complex; required with Sec3p for ER inheritance where it promotes anchoring of the cortical ER at the bud tip	814.217	0.110891	0.110882	1.00056	0.31704	0.523902
YDR167W	TAF10	protein_coding	IV	Subunit (145 kDa) of TFIID and SAGA complexes; involved in RNA polymerase II transcription initiation and in chromatin modification	162.636	0.298417	0.223623	1.33673	0.181312	0.375145
YDR168W	CDC37	protein_coding	IV	Essential Hsp90p co-chaperone; necessary for passage through the START phase of the cell cycle; stabilizes protein kinase nascent chains and participates along with Hsp90p in their folding	1167.53	-0.0145385	0.143561	-0.101251	0.919351	0.963204
YDR169C	STB3	protein_coding	IV	Ribosomal RNA processing element (RRPE)-binding protein; involved in the glucose-induced transition from quiescence to growth; restricted to nucleus in quiescent cells, released into cytoplasm after glucose repletion; binds Sin3p; relative distribution to the nucleus increases upon DNA replication stress	380.039	0.103067	0.171692	0.601068	0.547795	0.733562
YDR169C-A		protein_coding	IV	Putative protein of unknown function; identified by fungal homology and RT-PCR	8.47044	1.7558	0.674514	2.53003	0.0114053	0.0594205
YDR170C	SEC7	protein_coding	IV	Guanine nucleotide exchange factor (GEF) for ADP ribosylation factors; involved in proliferation of the Golgi, intra-Golgi transport and ER-to-Golgi transport; found in the cytoplasm and on Golgi-associated coated vesicles	3790.84	-0.163046	0.140744	-1.15845	0.246682	0.450317
YDR170W-A		protein_coding	IV	Retrotransposon TYA Gag gene; Gag is a nucleocapsid protein that is the structural constituent of virus-like particles (VLPs); similar to retroviral Gag; YDR170W-A is part of a mutant retrotransposon; distribution in the cytoplasm becomes irregular rather than punctate upon DNA replication stress	55.8276	1.77461	0.45133	3.8992	9.65103e-05	0.00194661
YDR171W	HSP42	protein_coding	IV	Small heat shock protein (sHSP) with chaperone activity; forms barrel-shaped oligomers that suppress unfolded protein aggregation; involved in cytoskeleton reorganization after heat shock; protein abundance increases and forms cytoplasmic foci in response to DNA replication stress	1582.26	-0.207541	0.282834	-0.733603	0.463191	0.666701
YDR172W	SUP35	protein_coding	IV	Translation termination factor eRF3; has a role in mRNA deadenylation and decay; altered protein conformation creates the	4353.91	-0.156916	0.164738	-0.952537	0.340825	0.550673
YDR173C	ARG82	protein_coding	IV	Inositol polyphosphate multikinase (IPMK); sequentially phosphorylates Ins(1,4,5)P3 to form Ins(1,3,4,5,6)P5; also has diphosphoinositol polyphosphate synthase activity; regulates arginine-, phosphate-, and nitrogen-responsive genes	149.401	-0.0633899	0.201598	-0.31308	0.75422	0.87573
YDR174W	HMO1	protein_coding	IV	Chromatin associated high mobility group (HMG) family member; involved in genome maintenance; rDNA-binding component of the Pol I transcription system; associates with a 5'-3' DNA helicase and Fpr1p, a prolyl isomerase; relocalizes to the cytosol in response to hypoxia	1101.33	-0.0152927	0.155031	-0.0997355	0.920554	0.963693
YDR175C	RSM24	protein_coding	IV	Mitochondrial ribosomal protein of the small subunit	408.375	-0.430743	0.155925	-2.76186	0.00574733	0.0369375
YDR176W	NGG1	protein_coding	IV	Subunit of chromatin modifying histone acetyltransferase complexes; member of the ADA complex, the SAGA complex, and the SLIK complex; transcriptional regulator involved in glucose repression of Gal4p-regulated genes	751.598	0.13823	0.156301	0.88485	0.376237	0.585511
YDR177W	UBC1	protein_coding	IV	Ubiquitin-conjugating enzyme; key E2 partner with Ubc4p for the anaphase-promoting complex (APC); mediates selective degradation of short-lived and abnormal proteins; plays a role in vesicle biogenesis and ER-associated protein degradation (ERAD); component of the cellular stress response; protein abundance increases in response to DNA replication stress key E2 partner with Ubc4p for the anaphase…	724.414	-0.0371342	0.174901	-0.212219	0.831936	0.916482
YDR178W	SDH4	protein_coding	IV	Membrane anchor subunit of succinate dehydrogenase (SDH); involved in coupling the oxidation of succinate to the transfer of electrons to ubiquinone as part of the TCA cycle and the mitochondrial respiratory chain; has similarity to human SDH subunit D (SDHD), which is implicated in paraganglioma	297.335	0.238766	0.175465	1.3639	0.172598	0.36435
YDR179C	CSN9	protein_coding	IV	Subunit of the Cop9 signalosome; Cop9 signalosome is required for deneddylation, or removal of the ubiquitin-like protein Rub1p from Cdc53p (cullin); involved in adaptation to pheromone signaling	57.8388	0.397872	0.316456	1.26447	0.206061	0.404134
YDR179W-A		protein_coding	IV	Putative protein of unknown function	338.948	0.38542	0.21777	1.77209	0.0763804	0.213893
YDR180W	SCC2	protein_coding	IV	Subunit of cohesin loading factor (Scc2p-Scc4p); a complex required for loading of cohesin complexes onto chromosomes; involved in establishing sister chromatid cohesion during DSB repair via histone H2AX; evolutionarily-conserved adherin; relocalizes to the cytosol in response to hypoxia	636.819	-0.351404	0.143754	-2.44461	0.014501	0.0700279
YDR181C	SAS4	protein_coding	IV	Subunit of the SAS complex (Sas2p, Sas4p, Sas5p); acetylates free histones and nucleosomes and regulates transcriptional silencing; required for the HAT activity of Sas2p	443.478	0.0727351	0.165213	0.442246	0.658311	0.811483
YDR182W	CDC1	protein_coding	IV	Putative lipid phosphatase of the endoplasmic reticulum; shows Mn2+ dependence and may affect Ca2+ signaling; mutants display actin and general growth defects and pleiotropic defects in cell cycle progression and organelle distribution	722.649	-0.140717	0.122789	-1.14571	0.251915	0.455662
YDR182W-A		protein_coding	IV	Putative protein of unknown function; identified by fungal homology and RT-PCR	59.0273	-0.351366	0.251019	-1.39812	0.162079	0.35014
YDR183C-A		protein_coding	IV	Dubious open reading frame unlikely to encode a functional protein; identified by fungal homology and RT-PCR	96.9509	-0.0032557	0.332458	-0.00986454	0.992129	0.996498
YDR183W	PLP1	protein_coding	IV	Protein that interacts with CCT (chaperonin containing TCP-1) complex; has a role in actin and tubulin folding; has weak similarity to phosducins, which are G-protein regulators	105.689	0.176088	0.213544	0.823416	0.410272	0.618363
YDR184C	ATC1	protein_coding	IV	Nuclear protein; possibly involved in regulation of cation stress responses and/or in the establishment of bipolar budding pattern; relative distribution to the nucleus decreases upon DNA replication stress	484.532	0.111795	0.228008	0.490393	0.623856	0.785323
YDR185C	UPS3	protein_coding	IV	Mitochondrial protein of unknown function; similar to Ups1p and Ups2p which are involved in regulation of mitochondrial cardiolipin and phosphatidylethanolamine levels; null is viable but interacts synthetically with ups1 and ups2 mutations; UPS3 has a paralog, UPS2, that arose from the whole genome duplication	86.2367	-0.618956	0.203286	-3.04346	0.00233873	0.0195327
YDR186C		protein_coding	IV	Putative protein of unknown function; may interact with ribosomes, based on co-purification experiments; green fluorescent protein (GFP)-fusion protein localizes to the cytoplasm	1950.19	0.410298	0.172658	2.37769	0.0174216	0.0793643
YDR188W	CCT6	protein_coding	IV	Subunit of the cytosolic chaperonin Cct ring complex; related to Tcp1p, essential protein that is required for the assembly of actin and tubulins in vivo; contains an ATP-binding motif	1613.74	-0.184745	0.134057	-1.37814	0.168161	0.358634
YDR189W	SLY1	protein_coding	IV	Hydrophilic protein involved in ER/Golgi vesicle trafficking; SM (Sec1/Munc-18) family protein that binds the tSNARE Sed5p and stimulates its assembly into a trans-SNARE membrane-protein complex	879.611	-0.380188	0.134414	-2.82854	0.00467609	0.0318201
YDR190C	RVB1	protein_coding	IV	ATP-dependent DNA helicase, also known as pontin; member of the AAA+ and RuvB-like protein families; similar to Rvb2p; conserved component of multiple complexes including the INO80 complex, the Swr1 complex, and the R2TP complex (Rvb1-Rvb2-Tah1-Pih1); involved in multiple processes such as chromatin remodeling, box C/D snoRNP assembly, and RNA polymerase II assembly	1371.61	-0.147182	0.179183	-0.82143	0.411402	0.61931
YDR191W	HST4	protein_coding	IV	Member of the Sir2 family of NAD(+)-dependent protein deacetylases; involved along with Hst3p in silencing at telomeres, cell cycle progression, radiation resistance, genomic stability and short-chain fatty acid metabolism	139.35	-0.147215	0.193683	-0.757998	0.448452	0.652179
YDR192C	NUP42	protein_coding	IV	FG-nucleoporin component of central core of the nuclear pore complex; also part of the nuclear pore complex (NPC) cytoplasmic filaments; contributes directly to nucleocytoplasmic transport and maintenance of the NPC permeability barrier and is involved in gene tethering at the nuclear periphery; interacts with Gle1p	206.676	-0.292693	0.151152	-1.93629	0.052832	0.16747
YDR193W		protein_coding	IV	Dubious open reading frame; unlikely to encode a functional protein, based on available experimental and comparative sequence data	2.54808	0.263643	0.749373	0.399155	0.689779
YDR194C	MSS116	protein_coding	IV	Mitochondrial transcription elongation factor; DEAD-box protein; required for efficient splicing of mitochondrial Group I and II introns; non-polar RNA helicase that also facilities strand annealing; promotes RNA folding by stabilizing an early assembly intermediate	2470.61	-0.29458	0.151319	-1.94686	0.0515509	0.164851
YDR195W	REF2	protein_coding	IV	RNA-binding protein; involved in the cleavage step of mRNA 3'-end formation prior to polyadenylation, and in snoRNA maturation; part of holo-CPF subcomplex APT, which associates with 3'-ends of snoRNA- and mRNA-encoding genes; relocalizes to the cytosol in response to hypoxia	307.798	0.0162052	0.156714	0.107939	0.914044	0.959925
YDR196C	CAB5	protein_coding	IV	Subunit of the CoA-Synthesizing Protein Complex (CoA-SPC); subunits of this complex are: Cab2p, Cab3p, Cab4p, Cab5p, Sis2p and Vhs3p; probable dephospho-CoA kinase (DPCK) that catalyzes the last step in coenzyme A biosynthesis; null mutant lethality is complemented by E. coli coaE (encoding DPCK); detected in purified mitochondria in high-throughput studies; also localized to lipid droplets	321.076	-0.0700483	0.168044	-0.415733	0.677605	0.822951
YDR197W	CBS2	protein_coding	IV	Mitochondrial translational activator of the COB mRNA; interacts with translating ribosomes, acts on the COB mRNA 5'-untranslated leader	387.941	-0.117918	0.128609	-0.915493	0.359933	0.569033
YDR198C	RKM2	protein_coding	IV	Ribosomal protein lysine methyltransferase; responsible for trimethylation of the lysine residue at position 3 of Rpl12Ap and Rpl12Bp	363.344	0.0615976	0.14737	0.41983	0.67461	0.820593
YDR200C	VPS64	protein_coding	IV	Protein required for cytoplasm to vacuole targeting of proteins; forms a complex with Far3p and Far7p to Far11p involved in recovery from pheromone-induced cell cycle arrest; mutant has increased aneuploidy tolerance; VPS64 has a paralog, FAR10, that arose from the whole genome duplication	304.496	0.23234	0.179767	1.29485	0.195373	0.392217
YDR201W	SPC19	protein_coding	IV	Essential subunit of the Dam1 complex (aka DASH complex); complex couples kinetochores to the force produced by MT depolymerization thereby aiding in chromosome segregation; also localized to nuclear side of spindle pole body	112.263	-0.166974	0.23857	-0.70064	0.483528	0.683383
YDR202C	RAV2	protein_coding	IV	Subunit of RAVE complex (Rav1p, Rav2p, Skp1p); the RAVE complex associates with the V1 domain of the vacuolar membrane (H+)-ATPase (V-ATPase) and promotes assembly and reassembly of the holoenzyme	331.661	-0.014781	0.144736	-0.101492	0.91916	0.963204
YDR203W		protein_coding	IV	Dubious open reading frame; unlikely to encode a functional protein, based on available experimental and comparative sequence data; almost completely overlaps ORF RAV2/YDR202C	4.23011	0.441244	0.720409	0.723875	0.469143	0.670503
YDR204W	COQ4	protein_coding	IV	Protein with a role in ubiquinone (Coenzyme Q) biosynthesis; possibly functioning in stabilization of Coq7p; located on the matrix face of the mitochondrial inner membrane; component of a mitochondrial ubiquinone-synthesizing complex	477.168	0.202674	0.165785	1.22284	0.221392	0.42239
YDR205W	MSC2	protein_coding	IV	Endoplasmic reticulum zinc transporter; part of a heterodimeric transporter with Zrg17p that transfers zinc from the cytosol to the ER lumen; member of the cation diffusion facilitator family of efflux pumps; localizes to ER and nucleus; mutations affect the cellular distribution of zinc and also confer defects in meiotic recombination between homologous chromatids	387.353	0.428525	0.120646	3.55675	0.000375469	0.00544242
YDR206W	EBS1	protein_coding	IV	Protein involved in translation inhibition and nonsense-mediated decay; interacts with cap binding protein Cdc33p and with Nam7p; localizes to P-bodies upon glucose starvation; mRNA abundance regulated by mRNA decay factors; EBS1 has a paralog, EST1, that arose from the whole genome duplication	1495.1	0.312669	0.108844	2.8734	0.00406084	0.0286768
YDR207C	UME6	protein_coding	IV	Rpd3L histone deacetylase complex subunit; key transcriptional regulator of early meiotic genes; involved in chromatin remodeling and transcriptional repression via DNA looping; binds URS1 upstream regulatory sequence, couples metabolic responses to nutritional cues with initiation and progression of meiosis, forms complex with Ime1p	252.386	0.0249915	0.150954	0.165714	0.868382	0.934696
YDR208W	MSS4	protein_coding	IV	Phosphatidylinositol-4-phosphate 5-kinase; involved in actin cytoskeleton organization and cell morphogenesis; multicopy suppressor of stt4 mutation	1783.4	0.258198	0.117487	2.19895	0.0278817	0.109122
YDR209C		protein_coding	IV	Dubious open reading frame; unlikely to encode a functional protein, based on available experimental and comparative sequence data; partially overlaps uncharacterized gene YDR210W	2.83578	-0.467302	0.749107	-0.724274	0.468897
YDR210C-D		protein_coding	IV	Retrotransposon TYA Gag and TYB Pol genes; transcribed/translated as one unit; polyprotein is processed to make a nucleocapsid-like protein (Gag), reverse transcriptase (RT), protease (PR), and integrase (IN); similar to retroviral genes	41.9097	0.86599	0.339235	2.55193	0.0107129	0.0568042
YDR210W		protein_coding	IV	Predicted tail-anchored plasma membrane protein; contains a conserved CYSTM module; related proteins in other organisms may be involved in response to stress; green fluorescent protein (GFP)-fusion protein localizes to the cell periphery	257.313	-0.185628	0.22992	-0.807381	0.419447	0.626731
YDR210W-B		protein_coding	IV	Retrotransposon TYA Gag and TYB Pol genes; transcribed/translated as one unit; polyprotein is processed to make a nucleocapsid-like protein (Gag), reverse transcriptase (RT), protease (PR), and integrase (IN); similar to retroviral genes	36.4491	-0.621045	0.406069	-1.53125	0.125708	0.298068
YDR211W	GCD6	protein_coding	IV	Catalytic epsilon subunit of the translation initiation factor eIF2B; eIF2B is the guanine-nucleotide exchange factor for eIF2; activity subsequently regulated by phosphorylated eIF2; first identified as a negative regulator of GCN4 expression; forms cytoplasmic foci upon DNA replication stress	2231.73	-0.0666473	0.130686	-0.509918	0.610109	0.776091
YDR212W	TCP1	protein_coding	IV	Alpha subunit of chaperonin-containing T-complex; complex mediates protein folding in the cytosol; involved in actin cytoskeleton maintenance; overexpression in neurons suppresses formation of pathogenic conformations of huntingtin protein	2626.55	-0.422072	0.166255	-2.53876	0.0111245	0.0582362
YDR213W	UPC2	protein_coding	IV	Sterol regulatory element binding protein; induces transcription of sterol biosynthetic genes and of DAN/TIR gene products; relocates from intracellular membranes to perinuclear foci on sterol depletion; UPC2 has a paralog, ECM22, that arose from the whole genome duplication	492.776	-0.405879	0.186258	-2.17938	0.0293033	0.113108
YDR214W	AHA1	protein_coding	IV	Co-chaperone that binds Hsp82p and activates its ATPase activity; plays a role in determining prion variants; similar to Hch1p; expression is regulated by stresses such as heat shock; protein abundance increases in response to DNA replication stress	1303.94	0.195082	0.140297	1.39079	0.164289	0.353387
YDR215C		protein_coding	IV	Dubious open reading frame; unlikely to encode a functional protein, based on available experimental and comparative sequence data; null mutant displays elevated sensitivity to expression of a mutant huntingtin fragment or of alpha-synuclein	4.40253	-0.433738	0.739068	-0.640419	0.5219	0.713753
YDR216W	ADR1	protein_coding	IV	Carbon source-responsive zinc-finger transcription factor; required for transcription of the glucose-repressed gene ADH2, of peroxisomal protein genes, and of genes required for ethanol, glycerol, and fatty acid utilization	1763.72	0.526177	0.228201	2.30719	0.0210444	0.0905096
YDR217C	RAD9	protein_coding	IV	DNA damage-dependent checkpoint protein; required for cell-cycle arrest in G1/S, intra-S, and G2/M, plays a role in postreplication repair (PRR) pathway; transmits checkpoint signal by activating Rad53p and Chk1p; hyperphosphorylated by Mec1p and Tel1p; multiple cyclin dependent kinase consensus sites and the C-terminal BRCT domain contribute to DNA damage checkpoint activation; Rad9p Chk1 Activa…	1174.45	0.172998	0.130967	1.32156	0.186314	0.381783
YDR218C	SPR28	protein_coding	IV	Sporulation-specific homolog of the CDC3/10/11/12 family of genes; meiotic septin expressed at high levels during meiotic divisions and ascospore formation; the yeast CDC3/10/11/12 family is a family of bud neck microfilament genes	27.2899	1.56711	0.455822	3.39186	0.000694208	0.00825559
YDR219C	MFB1	protein_coding	IV	Mitochondria-associated F-box protein; involved in maintenance of normal mitochondrial morphology; interacts with Skp1p through the F-box motif; preferentially localizes to the mother cell during budding	676.6	0.0872594	0.1318	0.664024	0.506675	0.700712
YDR220C		protein_coding	IV	Dubious open reading frame; unlikely to encode a functional protein, based on available experimental and comparative sequence data; null mutant exhibits synthetic phenotype with alpha-synuclein	3.42895	0.45786	0.724279	0.684758	0.493497	0.690202
YDR221W	GTB1	protein_coding	IV	Glucosidase II beta subunit, forms a complex with alpha subunit Rot2p; involved in removal of two glucose residues from N-linked glycans during glycoprotein biogenesis in the ER; relocalizes from ER to cytoplasm upon DNA replication stress	769.213	0.228625	0.106329	2.15092	0.0314822	0.118192
YDR222W		protein_coding	IV	Protein of unknown function; green fluorescent protein (GFP)-fusion protein localizes to the cytoplasm in a punctate pattern; YDR222W has a paralog, YLR225C, that arose from the whole genome duplication	626.532	0.132205	0.214306	0.617093	0.537174	0.72657
YDR223W	CRF1	protein_coding	IV	Transcriptional corepressor; involved in repression of ribosomal protein (RP) gene transcription via the TOR signaling pathway which promotes accumulation of Crf1p in the nucleus; role in repression of RP genes varies by strain; CRF1 has a paralog, IFH1, that arose from the whole genome duplication	71.4786	0.146523	0.38829	0.379432	0.704367	0.841052
YDR224C	HTB1	protein_coding	IV	Histone H2B; core histone protein required for chromatin assembly and chromosome function; nearly identical to HTB2; Rad6p-Bre1p-Lge1p mediated ubiquitination regulates reassembly after DNA replication, transcriptional activation, meiotic DSB formation and H3 methylation	2889.89	0.309164	0.0962967	3.21018	0.00132652	0.0133126
YDR225W	HTA1	protein_coding	IV	Histone H2A; core histone protein required for chromatin assembly and chromosome function; one of two nearly identical subtypes (see also HTA2); DNA damage-dependent phosphorylation by Mec1p facilitates DNA repair; acetylated by Nat4p; N-terminally propionylated in vivo	2750.26	0.095656	0.140131	0.682457	0.49495	0.691607
YDR226W	ADK1	protein_coding	IV	Adenylate kinase, required for purine metabolism; localized to the cytoplasm and the mitochondria; lacks cleavable signal sequence; protein abundance increases in response to DNA replication stress	2952.32	-0.986521	0.188092	-5.24418	1.56976e-07	1.25825e-05
YDR227W	SIR4	protein_coding	IV	SIR protein involved in assembly of silent chromatin domains; silent information regulator (SIR) along with SIR2 and SIR3; involved in assembly of silent chromatin domains at telomeres and the silent mating-type loci; potentially phosphorylated by Cdc28p; some alleles of SIR4 prolong lifespan	1060.43	0.324029	0.120288	2.69549	0.00702862	0.0423178
YDR228C	PCF11	protein_coding	IV	mRNA 3' end processing factor; essential component of cleavage and polyadenylation factor IA (CF IA), involved in pre-mRNA 3' end processing and in transcription termination; binds C-terminal domain of largest subunit of RNA pol II (Rpo21p); required for gene looping; relocalizes to the cytosol in response to hypoxia	634.954	-0.0864227	0.125844	-0.684822	0.493456	0.690202
YDR229W	IVY1	protein_coding	IV	Phospholipid-binding protein that interacts with both Ypt7p and Vps33p; may partially counteract the action of Vps33p and vice versa, localizes to the rim of the vacuole as cells approach stationary phase	435.41	-0.108297	0.124275	-0.870344	0.384112	0.594497
YDR231C	COX20	protein_coding	IV	Mitochondrial inner membrane protein; required for proteolytic processing of Cox2p and its assembly into cytochrome c oxidase	227.933	0.022313	0.20233	0.112495	0.910431	0.957271
YDR232W	HEM1	protein_coding	IV	5-aminolevulinate synthase; catalyzes the first step in the heme biosynthetic pathway; an N-terminal signal sequence is required for localization to the mitochondrial matrix; expression is regulated by Hap2p-Hap3p	2401.13	-0.0289834	0.131228	-0.220812	0.825239	0.913938
YDR233C	RTN1	protein_coding	IV	Reticulon protein; stabilizes membrane curvature; involved in nuclear pore assembly and maintenance of tubular ER morphology; mutant overexpressing RTN1 shows increase in tubular ER; interacts with exocyst subunit Sec6p, Yip3p, and Sbh1p; more abundant than Rtn2p; member of the RTNLA subfamily; mutants have reduced phosphatidylserine transfer between the ER and mitochondria; RTN1 has a paralog, R…	2660.63	-0.176071	0.141362	-1.24553	0.212936	0.412894
YDR234W	LYS4	protein_coding	IV	Homoaconitase; catalyzes the conversion of homocitrate to homoisocitrate, which is a step in the lysine biosynthesis pathway	1793.27	0.368828	0.239751	1.53896	0.123814	0.294595
[truncated: 4,977 more rows]

## Sheet: rsc2_vs_WT
id	gene_name	biotype	chromosome	description	baseMean	log2FoldChange	lfcSE	stat	pvalue	padj
[truncated: 6,311 more rows]

## Sheet: hmo1_vs_WT
id	gene_name	biotype	chromosome	description	baseMean	log2FoldChange	lfcSE	stat	pvalue	padj
[truncated: 6,311 more rows]

[truncated: 13 more sheets: rsc30_vs_WT, rsc1hmo1_vs_WT, rsc2hmo1_vs_WT, rsc1rsc30_vs_WT, rsc2rsc30_vs_WT, # genes affected, Ribosomal proteins, raw_counts, summary, normalized, rlog, samples, ensembl]
