# Supplementary material for: Specialization of the chromatin remodeler RSC to mobilize partially-unwrapped nucleosomes
Source: eLife journal article supplement (doi:10.7554/elife.58130), 2020-06-04
Supplement: supp [file elife-58130-supp-v1.zip › elife_poa_e58130_Supplementary_file_1.xlsx]

## Sheet: Sheet1
Strain #	Mat	Genotype
YBC82	mat α	lys2-128∂ leu2∆1 ura3-52 trp1∆63 his3∆200 rsc2∆::HIS3
BCY211	mat a	Rsc2-TAP::TRP pep4::HIS3 prb1::LEU2 prc1::HISG can1 ade2 trp1 ura3 his3 leu2-3,112 cir° GAL+ RAF+ SUC+
BCY516	mat α	Rsc1-TAP::TRP pep4::HIS3 prb1::LEU2 lys2::GAL1/10-GAL4 can1 ade2 trp1 ura3 his3 leu2-3,112 cir+ GAL+ RAF+ SUC+
YBC604	mat α	his3∆200 leu2∆0 lys2∆0 met15∆0 trp1∆63 ura3∆0 (BY4727; Brachmann et al, 1998)
YBC695	mat a	leu2∆0 trp1∆63 his3∆200 ade2∆::hisG lys2∆0 met15∆0 rsc30∆::LEU2
YBC774	mat α	ura3-52(or ∆0) trp1∆63 leu2∆0 his3∆200 lys2∆0 rsc1∆::HIS3
YBC800	mat α	lys2-128∂ ade2∆::hisG his3∆200 leu2∆1 trp1∆63 ura3∆0(-52) rsc1∆::HIS3 rsc2∆::LEU2 [p199; 316.RSC2.2XHA]
YBC839	mat α	leu2∆0 trp1∆63 his3∆200 ade2∆::hisG lys2∆0 met15∆0 ura3∆0 rsc30∆::LEU2 rsc1∆::HIS3
YBC910	mat a	lys2-128∂ ura3-52 his3∆200 leu2∆0 trp1∆63 ade2∆::hisG lys2∆0 met15∆0 ura3∆0 rsc30∆::LEU2 rsc2∆::HIS3
YBC1544	mat a	ura3-52 trp1∆63 his3∆200 leu2::PET56 Rsc1-9myc::TRP1; (yHN1; Ng et al, 2002)
YBC1545	mat a	ura3-52 trp1∆63 his3∆200 leu2::PET56 Rsc2-9myc::TRP1 (yHN2; Ng et al, 2002)
YBC1546	mat a	ura3-52 trp1∆63 his3∆200 leu2::PET56 Rsc3-9myc::TRP1 (yHN23 Ng et al, 2002)
YBC1939	mat a	hht1-hhf1::pWZ405-F2F9-LEU2, hht2-hhf2::pWZ403-F4F10-HIS3 ura3-52 lys2-801 ade2-101 trp1∆63 his3∆200 leu2∆1 [p1408.YCp50 HHT2-HHF2.URA3]; (WZY42; Zhang et al, 1998)
YBC2090	mat a	rsc1∆::HIS3 hht1-hhf1::pWZ405-F2F9-LEU2, hht2-hhf2::pWZ403-F4F10-HIS3 ura3-52 lys2-801 (or lys2-128∂) ade2-101 (or ade2∆::hisG) trp1∆63 his3∆200 leu2∆1 (or∆0) [p1408.YCp50 HHT2-HHF2.URA3]
YBC3040	mat a	rsc1∆::HIS3 rsc2∆::Natmx hht1-hhf1::pWZ405-F2F9-LEU2 hht2-hhf2::pWZ403-F4F10-HIS3 ura3-52 lys2-801 (or lys2-128∂) ade2-101 (or ade2∆::hisG) trp1∆63 his3∆200 leu2∆1 (or∆) [p1408.YCp50 HHT2-HHF2.URA3] [p2472; 317.RSC1]
YBC3192	mat a	hta1-htb1∆::LEU2 hta2-htb2∆ ura3-52 ade2∆ trp1∆63 his3∆200 leu2∆1 [HTA1-HTB1.URA3] (YBL397; Nakanishi et al, 2008)
YBC3221	mat a	rsc1∆::kanmx hta1-htb1∆::LEU2 hta2-htb2∆ ura3-52(or∆) ade2∆ trp1∆63 his3∆200 leu2∆1(or∆0) [HTA1-HTB1.URA3]
YBC3432	mat a	rsc1∆::HIS3 rsc2∆::Natmx hht1-hhf1::pWZ405-F2F9-LEU2 hht2-hhf2::pWZ403-F4F10-HIS3 ura3-52 lys2-801 (or lys2-128∂) ade2-101 (or ade2∆::hisG) trp1∆63 his3∆200 leu2∆1 (or∆0) [p2530;H3.K56Q-H4.WT.LYS2] [p166; 316.RSC1]
YBC3433	mat a	rsc1∆::HIS3 rsc2∆::Natmx hht1-hhf1::pWZ405-F2F9-LEU2 hht2-hhf2::pWZ403-F4F10-HIS3 ura3-52 lys2-801 (or lys2-128∂) ade2-101 (or ade2∆::hisG) trp1∆63 his3∆200 leu2∆1 (or∆0) [p2924; H3.G44A-H4.WT.LYS2] [p166; 316.RSC1]
YBC3444	mat a	rsc1∆::HIS3 rsc2∆::Natmx hht1-hhf1::pWZ405-F2F9-LEU2 hht2-hhf2::pWZ403-F4F10-HIS3 ura3-52 lys2-801 (or lys2-128∂) ade2-101(or ade2∆::hisG) trp1∆63 his3∆200 leu2∆1 (or∆0) [p2927; H3.R40A-H4.WT.LYS2] [p166; 316.RSC1]
YBC3446	mat a	rsc1∆::HIS3 rsc2∆::Natmx hht1-hhf1::pWZ405-F2F9-LEU2 hht2-hhf2::pWZ403-F4F10-HIS3 ura3-52 lys2-801 (or lys2-128∂) ade2-101 (or ade2∆::hisG) trp1∆63 hs3∆200 leu2∆1 (or∆0) [p1831; H3-H4 WT. LYS2 ] [p166; 316.RSC1]
YBC3547	mat α	rsc2∆::kanmx hta1-htb1∆::LEU2 hta2-htb2∆ ura3-52 ade2∆ trp1∆63 his3∆200 leu2∆1 [HTA1-HTB1.URA3]
YBC3514	mat α	his3∆200 (or∆1) leu2∆0 met15∆0 trp1∆63 ura3-52 (or∆0) rsc1∆::HIS3 hmo1∆::kanmx
YBC3515	mat α	leu2∆0 ura3-52 (or∆0) trp1∆63 his3∆200 (or∆1) rsc2∆::HIS3 hmo1∆::kanmx
YBC3558	mat a	ura3-52 trp1∆63 his3∆200 leu2::PET56 Rsc1-9myc::TRP1 Hmo1-V5::HIS3MX
YBC3559	mat a	ura3-52 trp1∆63 his3∆200 leu2::PET56 Rsc2-9myc::TRP1 Hmo1-V5::HIS3MX
YBC3586	mat a	rsc1∆::HIS3 hht1-hhf1::pWZ405-F2F9-LEU2 hht2-hhf2::pWZ403-F4F10-HIS3 ura3-52 lys2-801 (or lys2-128∂) ade2-101 (or ade2∆::hisG) trp1∆63 his3∆200 leu2∆1 (or∆0) [p2779; H3.V46A-H4.WT.TRP1]
Supplementary File 1. Yeast strains used in this study and their genotypes. BCY211 and BCY516 are W303 background, all other strains are S288C derivatives.

## Sheet: Sheet2
Strain #	Mat	Genotype
YBC82	mat α	lys2-128∂ leu2∆1 ura3-52 trp1∆63 his3∆200 rsc2∆::HIS3
BCY211	mat a	Rsc2-TAP::TRP pep4::HIS3 prb1::LEU2 prc1::HISG can1 ade2 trp1 ura3 his3 leu2-3,112 cir° GAL+ RAF+ SUC+
BCY516	mat α	Rsc1-TAP::TRP pep4::HIS3 prb1::LEU2 lys2::GAL1/10-GAL4 can1 ade2 trp1 ura3 his3 leu2-3,112 cir+ GAL+ RAF+ SUC+
YBC604	mat α	his3∆200 leu2∆0 lys2∆0 met15∆0 trp1∆63 ura3∆0
YBC695	mat a	leu2∆0 trp1∆63 his3∆200 ade2∆::hisG lys2∆0 met15∆0 rsc30∆::LEU2
YBC774	mat α	ura3-52 (∆0) trp1∆63 leu2∆0 his3∆200 lys2∆0 rsc1∆::HIS3
YBC800	mat α	lys2-128∂ ade2∆::hisG his3∆200 leu2∆1 trp1∆63 ura3∆0(-52) rsc1∆::HIS3 rsc2∆::LEU2 [p199; 316.RSC2.2XHA]
YBC839	mat α	leu2∆0 trp1∆63 his3∆200 ade2∆::hisG lys2∆0 met15∆0 ura3∆0 rsc30∆::LEU2 rsc1∆::HIS3
YBC910	mat a	lys2-128∂ ura3-52 his3∆200 leu2∆0 trp1∆63 ade2∆::hisG lys2∆0 met15∆0 ura3∆0 rsc30∆::LEU2 rsc2∆::HIS3
YBC1544	mat a	ura3-52 trp1∆63 his3∆200 leu2::PET56 Rsc1-9myc::TRP1; (yHN1; Ng et al, G &D 200)
YBC1545	mat a	ura3-52 trp1∆63 his3∆200 leu2::PET56 Rsc2-9myc::TRP1
YBC1939	mat a	hht1-hhf1::pWZ405-F2F9-LEU2, hht2-hhf2::pWZ403-F4F10-HIS3 ura3-52 lys2-801 ade2-101 trp1∆63 his3∆200 leu2∆1 [p1408.YCp50 HHT2-HHF2.URA3]; (WZY42; Zhang et al, Embo 1998)
YBC2090	mat a	rsc1∆::HIS3 hht1-hhf1::pWZ405-F2F9-LEU2, hht2-hhf2::pWZ403-F4F10-HIS3 ura3-52 lys2-801(or lys2-128∂) ade2-101 (or ade2∆::hisG) trp1∆63 his3∆200 leu2∆1(or∆) [p1408.YCp50 HHT2-HHF2.URA3]
YBC3040	mat a	rsc1∆::HIS3 rsc2∆::Natmx hht1-hhf1::pWZ405-F2F9-LEU2, hht2-hhf2::pWZ403-F4F10-HIS3 ura3-52 lys2-801(or lys2-128∂) ade2-101(or ade2∆::hisG) trp1∆63 his3∆200 leu2∆1(or∆) [p1408.YCp50 HHT2-HHF2.URA3][p2472; 317.RSC1]
YBC3432	mat a	rsc1∆::HIS3 rsc2∆::Natmx hht1-hhf1::pWZ405-F2F9-LEU2, hht2-hhf2::pWZ403-F4F10-HIS3 ura3-52 lys2-801(or lys2-128∂) ade2-101 (or ade2∆::hisG) trp1∆63 his3∆200 leu2∆1(or∆) [p2530;H3.K56Q-H4.WT.LYS2] [p166; 316.RSC1]
YBC3433	mat a	rsc1∆::HIS3 rsc2∆::Natmx hht1-hhf1::pWZ405-F2F9-LEU2, hht2-hhf2::pWZ403-F4F10-HIS3 ura3-52 lys2-801(or lys2-128∂) ade2-101 (or ade2∆::hisG) trp1∆63 his3∆200 leu2∆1(or∆) [p2924; H3.G44A-H4.WT.LYS2][p166; 316.RSC1]
YBC3444	mat a	rsc1∆::HIS3 rsc2∆::Natmxhht1-hhf1::pWZ405-F2F9-LEU2, hht2-hhf2::pWZ403-F4F10-HIS3 ura3-52 lys2-801(or lys2-128∂) ade2-101(or ade2∆::hisG) trp1∆63 his3∆200 leu2∆1(or∆) [p2927; H3.R40A-H4.WT.LYS2] [p166; 316.RSC1]
YBC3446	mat a	rsc1∆::HIS3 rsc2∆::Natmx hht1-hhf1::pWZ405-F2F9-LEU2, hht2-hhf2::pWZ403-F4F10-HIS3 ura3-52 lys2-801(or lys2-128∂) ade2-101 (or ade2∆::hisG) trp1∆63 hs3∆200 leu2∆1(or∆) [p1831; H3-H4 WT. LYS2 ][p166; 316.RSC1]
YBC3509	mat a	his3∆1 leu2∆0 met15∆0 ura3∆0 hmo1∆::KanMX (from Invitrogen mat a collection)
YBC3514	mat α	his3∆200 (or∆1) leu2∆0 met15∆0 trp1∆63 ura3-52 (or∆0) rsc1∆::HIS3 hmo1∆::kanmx
YBC3515	mat α	leu2∆0 ura3-52 (or∆0) trp1∆63 his3∆200 (or∆1) rsc2∆::HIS3 hmo1∆::kanmx
YBC3558	mat a	ura3-52 trp1∆63 his3∆200 leu2::PET56 Rsc1-9myc::TRP1 Hmo1-V5::HIS3MX
YBC3559	mat a	ura3-52 trp1∆63 his3∆200 leu2::PET56 Rsc2-9myc::TRP1 Hmo1-V5::HIS3MX
might add later:
YBC3221	mat a	rsc1∆::Kanmx hta1-htb1∆::LEU2 hta2-htb2∆ leu2∆1(∆0) ura3-52(∆0) trp1∆63 his3∆200 ade2∆[HTA1-HTB1; URA3]
YBC3457	mat α	rsc2∆::kanmx hta1-htb1∆::LEU2 hta2-htb2∆ leu2∆1 ura3-52 trp1∆63 his3∆200 [HTA1-HTB1; URA3; 2 micron]
YBC3556	mat α	his3∆200(or∆1) leu2::PET56(or leu2∆0) ura3-52 Rsc1-9myc::TRP1 hmo1∆::Kanmx
YBC3557	mat α	his3∆200(or∆1) leu2::PET56(or leu2∆0) ura3-52 Rsc2-9myc::TRP1 hmo1∆::Kanmx
