# Supplementary material for: Specialization of the chromatin remodeler RSC to mobilize partially-unwrapped nucleosomes
Source: eLife journal article supplement (doi:10.7554/elife.58130), 2020-06-04
Supplement: supp [file elife-58130-supp-v1.zip › elife_poa_e58130_Supplementary_file_2.xlsx]

## Sheet: Sheet1
#	Plasmid Name	Source
p6	pRS314	Sikorski and Hieter, 1989
p10	pRS424	Sikorski and Hieter, 1989
p12	pRS426	Sikorski and Hieter, 1989
p198	426.RSC2	Cairns et al, 1999
p609	314.RSC1.3XMYC	Cairns et al, 1999
p705	426.RSC1	Cairns et al, 1999
p911	424.RSC30	This work
p916	426.RSC30	Angus-Hill et al, 2001
p929	424.RSC3	This work
p1310	426.RSC3	Wilson et al, 2007
p2380	pEMH7-K56Q	Hyland et al, 2005
p2609	424.RSC1.TRP1	This work
p2779	414.H3-V46A.H4-WT	Nakanishi et al, NSMB 2008
p3097	314.RSC1w/2CT2-R656.2XHA	This work
p3098	314.RSC2w/1CT2-K617.3XMYC	This work
p3132	314.RSC1 731-853∆.3XMYC	This work
p3133	314.RSC2 580-774∆.2XHA	This work
p3162	314.RSC1 391-729∆.3XMYC	This work
p3164	314.RSC1w/2CT2-E788.2XHA	This work
p3165	314.RSC2w/1CT2-A728.3XMYC	This work
p3166	314.RSC1w/2CT2-A745.2XHA	This work
p3167	314.RSC2w/1CT2-Q777.3XMYC	This work
p3390	426.HMO1	T. Formosa, Univ. of Utah
p3391	pET.8xHIS.Hmo1	T. Formosa, Univ. of Utah
p3415	424.RSC2	This work
	H3-H4 histone mutant library	Nakanishi et al, NSMB 2008
	H2A-H2B histone mutant library	Nakanishi et al, NSMB 2008
	Nucleosome Positioning Sequences
205bp 601	CCGAGTCGCTGTTCAATACATGCACAGGATGTATATATCTGACACGTGCCTGGAGACTAGGGAGTAATCCCCTTGGCGGTTAAAACGCGGGGGACAGCGCGTACGTGCGTTTAAGCGGTGCTAGAGCTTGCTACGACCAATTGAGCGGCCTCGGCACCGGGATTCTCCAGGGCGGCCGCGTATAGGGTCCATCACATAACCCGAA
174bp 5S	AATTCCAACGAATAACTTCCAGGGATTTATAAGCCGATGACGTCATAACATCCCTGACCCTTTAAATAGCTTAACTTTCATCAAGCAAGAGCCTACGACCATACCATGCTGAATATACCGGTTCTCGTCCGATCACCGAAGTCAAGCAGCATAGGGCTCGGTTAGTATGCCAGG
	UMI Adaptor Oligo
	5'-Phos-NNN NNN NNG ATC GGA AGA GCA CAC GTC TGA ACT CCA GTC UAC ACT CTT TCC CTA CAC GAC GCT CTT CCG ATC-3'
Supplementary File 2. Plasmids and DNA Sequences used in this study. w/ indicates "with".
