# Supplementary material for: Specialization of the chromatin remodeler RSC to mobilize partially-unwrapped nucleosomes
Source: eLife journal article supplement (doi:10.7554/elife.58130), 2020-06-04
Supplement: supp [file Figure 2-Source Data 1 ATPase Time Course data.xlsx]

## Sheet: RSC ATPase Time Course
	RSC2+3/30						RSC2-3/30						RSC1+3/30						RSC1-3/30
Minutes	1	2	3	4	5	6	1	2	3	4	5	6	1	2	3	4	5	6	1	2	3	4	5	6
4	0.026	0.021	0.02	0.058	0.036	0.023	0.134	0.087	0.083	0.059	0.12	0.069	0.062	0.043	0.013	0.014	0.085	0.084	0.017	0.04	0.043	0.011	0.006	0.016
10	0.082	0.067	0.061	0.142	0.115	0.086	0.102	0.088	0.076	0.147	0.156	0.151	0.129	0.087	0.1	0.095	0.093	0.09	0.005	0.082	0.071	0.038	0.012	0.043
16	0.169	0.126	0.117	0.268	0.191	0.144	0.182	0.183	0.15	0.269	0.251	0.219	0.201	0.152	0.121	0.166	0.164	0.136	0.184	0.196	0.247	0.101	0.143	0.144
30	0.242	0.231	0.224	0.41	0.31	0.274	0.341	0.233	0.325	0.37	0.437	0.366	0.316	0.258	0.238	0.203	0.237	0.197	0.502	0.307	0.247	0.183	0.174	0.157
60	0.421	0.429	0.377	0.576	0.564	0.473	0.483	0.406	0.464	0.591	0.631	0.569	0.442	0.476	0.37	0.383	0.434	0.233	0.479	0.5	0.45	0.404	0.401	0.376
90	0.561	0.583	0.51	0.752	0.623	0.639	0.694	0.355	0.504	0.746	0.784	0.704	0.434	0.493	0.412	0.451	0.456	0.493	0.461	0.478	0.431	0.489	0.452	0.449
