# Supplementary material for: Specialization of the chromatin remodeler RSC to mobilize partially-unwrapped nucleosomes
Source: eLife journal article supplement (doi:10.7554/elife.58130), 2020-06-04
Supplement: supp [file Figure 3-Source Data 1 RSC sliding 5S R40A yNuc.xls]

## Sheet: RSC sliding 5S R40A
174bp 5S R40A yNucs RSC Sliding Time Course #2 -- 022219.
		RSC1+3/30 R40A 5S yNucs							RSC2+3/30 R40A 5S yNucs
Ref Band		0	2'	10'	20'	40'	90'		0	2'	10'	20'	40'	90'
Number		Volume	Volume	Volume	Volume	Volume	Volume		Volume	Volume	Volume	Volume	Volume	Volume
Top			779053	4.03224e+06	3.4712e+06	3.96989e+06	8.39409e+06						870007	3333166
Lower		2.84918e+07	2.25055e+07	9.9133e+06	9.78499e+06	1.17546e+07	9.28798e+06		3.46485e+07	3.03623e+07	2.65483e+07	2.15097e+07	2.07624e+07	2.10528e+07
Free DNA		493607	5.69264e+06	7.58241e+06	7.32808e+06	8.50112e+06	6.30405e+06		199198	2.42752e+06	4.21791e+06	4.88095e+06	5.23067e+06	4.68456e+06
Total shifts		2.84918e+07	2.32845e+07	1.39455e+07	1.32562e+07	1.57245e+07	1.76821e+07		3.46485e+07	3.03623e+07	2.65483e+07	2.15097e+07	2.16324e+07	2.43859e+07
Total Signal		2.89854e+07	2.89772e+07	2.15279e+07	2.05843e+07	2.42257e+07	2.39861e+07		3.48477e+07	3.27898e+07	3.07662e+07	2.63907e+07	2.68631e+07	2.90705e+07
% Slid		0	0.0268851	0.187303	0.168634	0.163872	0.349956		0	0	0	0	0.0323867	0.114658
% Start		0.982971	0.776662	0.460485	0.475362	0.485215	0.387223		0.994284	0.925967	0.862904	0.81505	0.772897	0.724197
% DNA		0.0170295	0.196453	0.352212	0.356004	0.350914	0.262821		0.00571625	0.0740327	0.137096	0.18495	0.194716	0.161145
		RSC1-3/30 R40A 5S yNucs							RSC2-3/30 R40A 5S yNucs
Ref Band		0	2'	10'	20'	40'	90'		0	2'	10'	20'	40'	90'
Number		Volume	Volume	Volume	Volume	Volume	Volume		Volume	Volume	Volume	Volume	Volume	Volume
Top				4.77329e+06	6.39874e+06	9.0811e+06	1.23258e+07						3.37593e+06	4.1041e+06
Lower		3.63288e+07	2.55403e+07	1.56994e+07	1.4217e+07	1.57965e+07	1.14634e+07		3.05007e+07	2.22977e+07	2.07861e+07	2.22815e+07	2.30769e+07	1.74967e+07
Free DNA		236426	4.11924e+06	6.18562e+06	6.88863e+06	7.22623e+06	6.13995e+06		236426	2.93905e+06	3.86665e+06	4.6414e+06	5.39492e+06	4.49569e+06
Total shifts		3.63288e+07	2.55403e+07	2.04726e+07	2.06158e+07	2.48776e+07	2.37891e+07		3.05007e+07	2.22977e+07	2.07861e+07	2.22815e+07	2.64529e+07	2.16008e+07
Total Signal		3.65652e+07	2.96595e+07	2.66583e+07	2.75044e+07	3.21039e+07	2.99291e+07		3.07371e+07	2.52367e+07	2.46527e+07	2.69229e+07	3.18478e+07	2.60965e+07
% Slid		0	0	0.179055	0.232644	0.282866	0.411832		0	0	0	0	0.106002	0.157266
% Start		0.993534	0.861116	0.588912	0.5169	0.492044	0.383018		0.992308	0.883541	0.843155	0.827604	0.724601	0.670462
% DNA		0.00646586	0.138884	0.232034	0.250455	0.225089	0.20515		0.00769186	0.116459	0.156845	0.172396	0.169397	0.172272
