# Supplementary material for: Specialization of the chromatin remodeler RSC to mobilize partially-unwrapped nucleosomes
Source: eLife journal article supplement (doi:10.7554/elife.58130), 2020-06-04
Supplement: supp [file Figure 4-Source Data 1 Hmo1 enhances RSC sliding.xls]

## Sheet: 100fmol
174bp wt 5S yNucs + Hmo1 4RSCs Sliding. 030119														174bp 5S wt yNuc + Hmo1 Sliding by 4 RSC Complexes -- 030119
		100fmol RSC1+3/30						100fmol RSC2+3/30
Ref Band		No RSC	0	50	100	200			0	50	100	200
Number		Volume	Volume	Volume	Volume	Volume		Volume	Volume	Volume	Volume	Volume
Top			9.0011e+06	1.27448e+07	1.67376e+07	2.03731e+07			2.09852e+06	8.23094e+06	1.02604e+07	1.8235e+07
Bottom		3.55405e+07	2.04101e+07	1.32132e+07	1.13035e+07	1.01028e+07		3.55405e+07	2.1531e+07	1.45079e+07	1.05783e+07	1.05731e+07
Free DNA
Total shifts		3.55405e+07	2.94112e+07	2.59581e+07	2.80411e+07	3.0476e+07		3.55405e+07	2.36295e+07	2.27388e+07	2.08387e+07	2.88081e+07
% Top		0	30.6043	49.0977	59.6895	66.8499		0	8.88094	36.1977	49.2373	63.2981
%Bottom		100	69.3957	50.9023	40.3105	33.1501		100	91.1191	63.8023	50.7627	36.7019
		100fmol RSC1-3/30						100fmol RSC2-3/30
Ref Band		No RSC	0	50	100	200			0	50	100	200
Number		Volume	Volume	Volume	Volume	Volume		Volume	Volume	Volume	Volume	Volume
Top			1.4654e+07	1.93839e+07	1.93173e+07	1.69637e+07			3.01731e+06	8.05706e+06	1.12625e+07	1.2248e+07
Bottom		3.59662e+07	1.32366e+07	9.58258e+06	8.48404e+06	8.74551e+06		3.59662e+07	1.94957e+07	1.38202e+07	1.13533e+07	6.35268e+06
Free DNA
Total shifts		3.59662e+07	2.78907e+07	2.89665e+07	2.78014e+07	2.57092e+07		3.59662e+07	2.2513e+07	2.18772e+07	2.26158e+07	1.86007e+07
% Top		0	52.541	66.9183	69.4834	65.9829		0	13.4025	36.8285	49.7992	65.8471
%Bottom		100	47.459	33.0817	30.5166	34.0171		100	86.5975	63.1715	50.2008	34.1529
